# Supplementary material
Source: PubMed Central journal article supplement (PMC7768709)
Supplement: pnas.2015117117.sapp.pdf [file pnas.2015117117.sapp.pdf]

# PNAS

[www.pnas.org](http://www.pnas.org)

## **Supplementary Information for**

Reconstructing orogens without biostratigraphy: The Saharides and continental growth during the final assembly of Gondwana-Land

A. M. Celâl Şengör, Nalan Lom, Cengiz Zabcı, Gürsel Sunal, Tayfun Öner

A. M. Celâl Şengör

Email: [sengor@itu.edu.tr](mailto:sengor@itu.edu.tr)

### **This PDF file includes:**

Figure S1

Tables S1 to S2

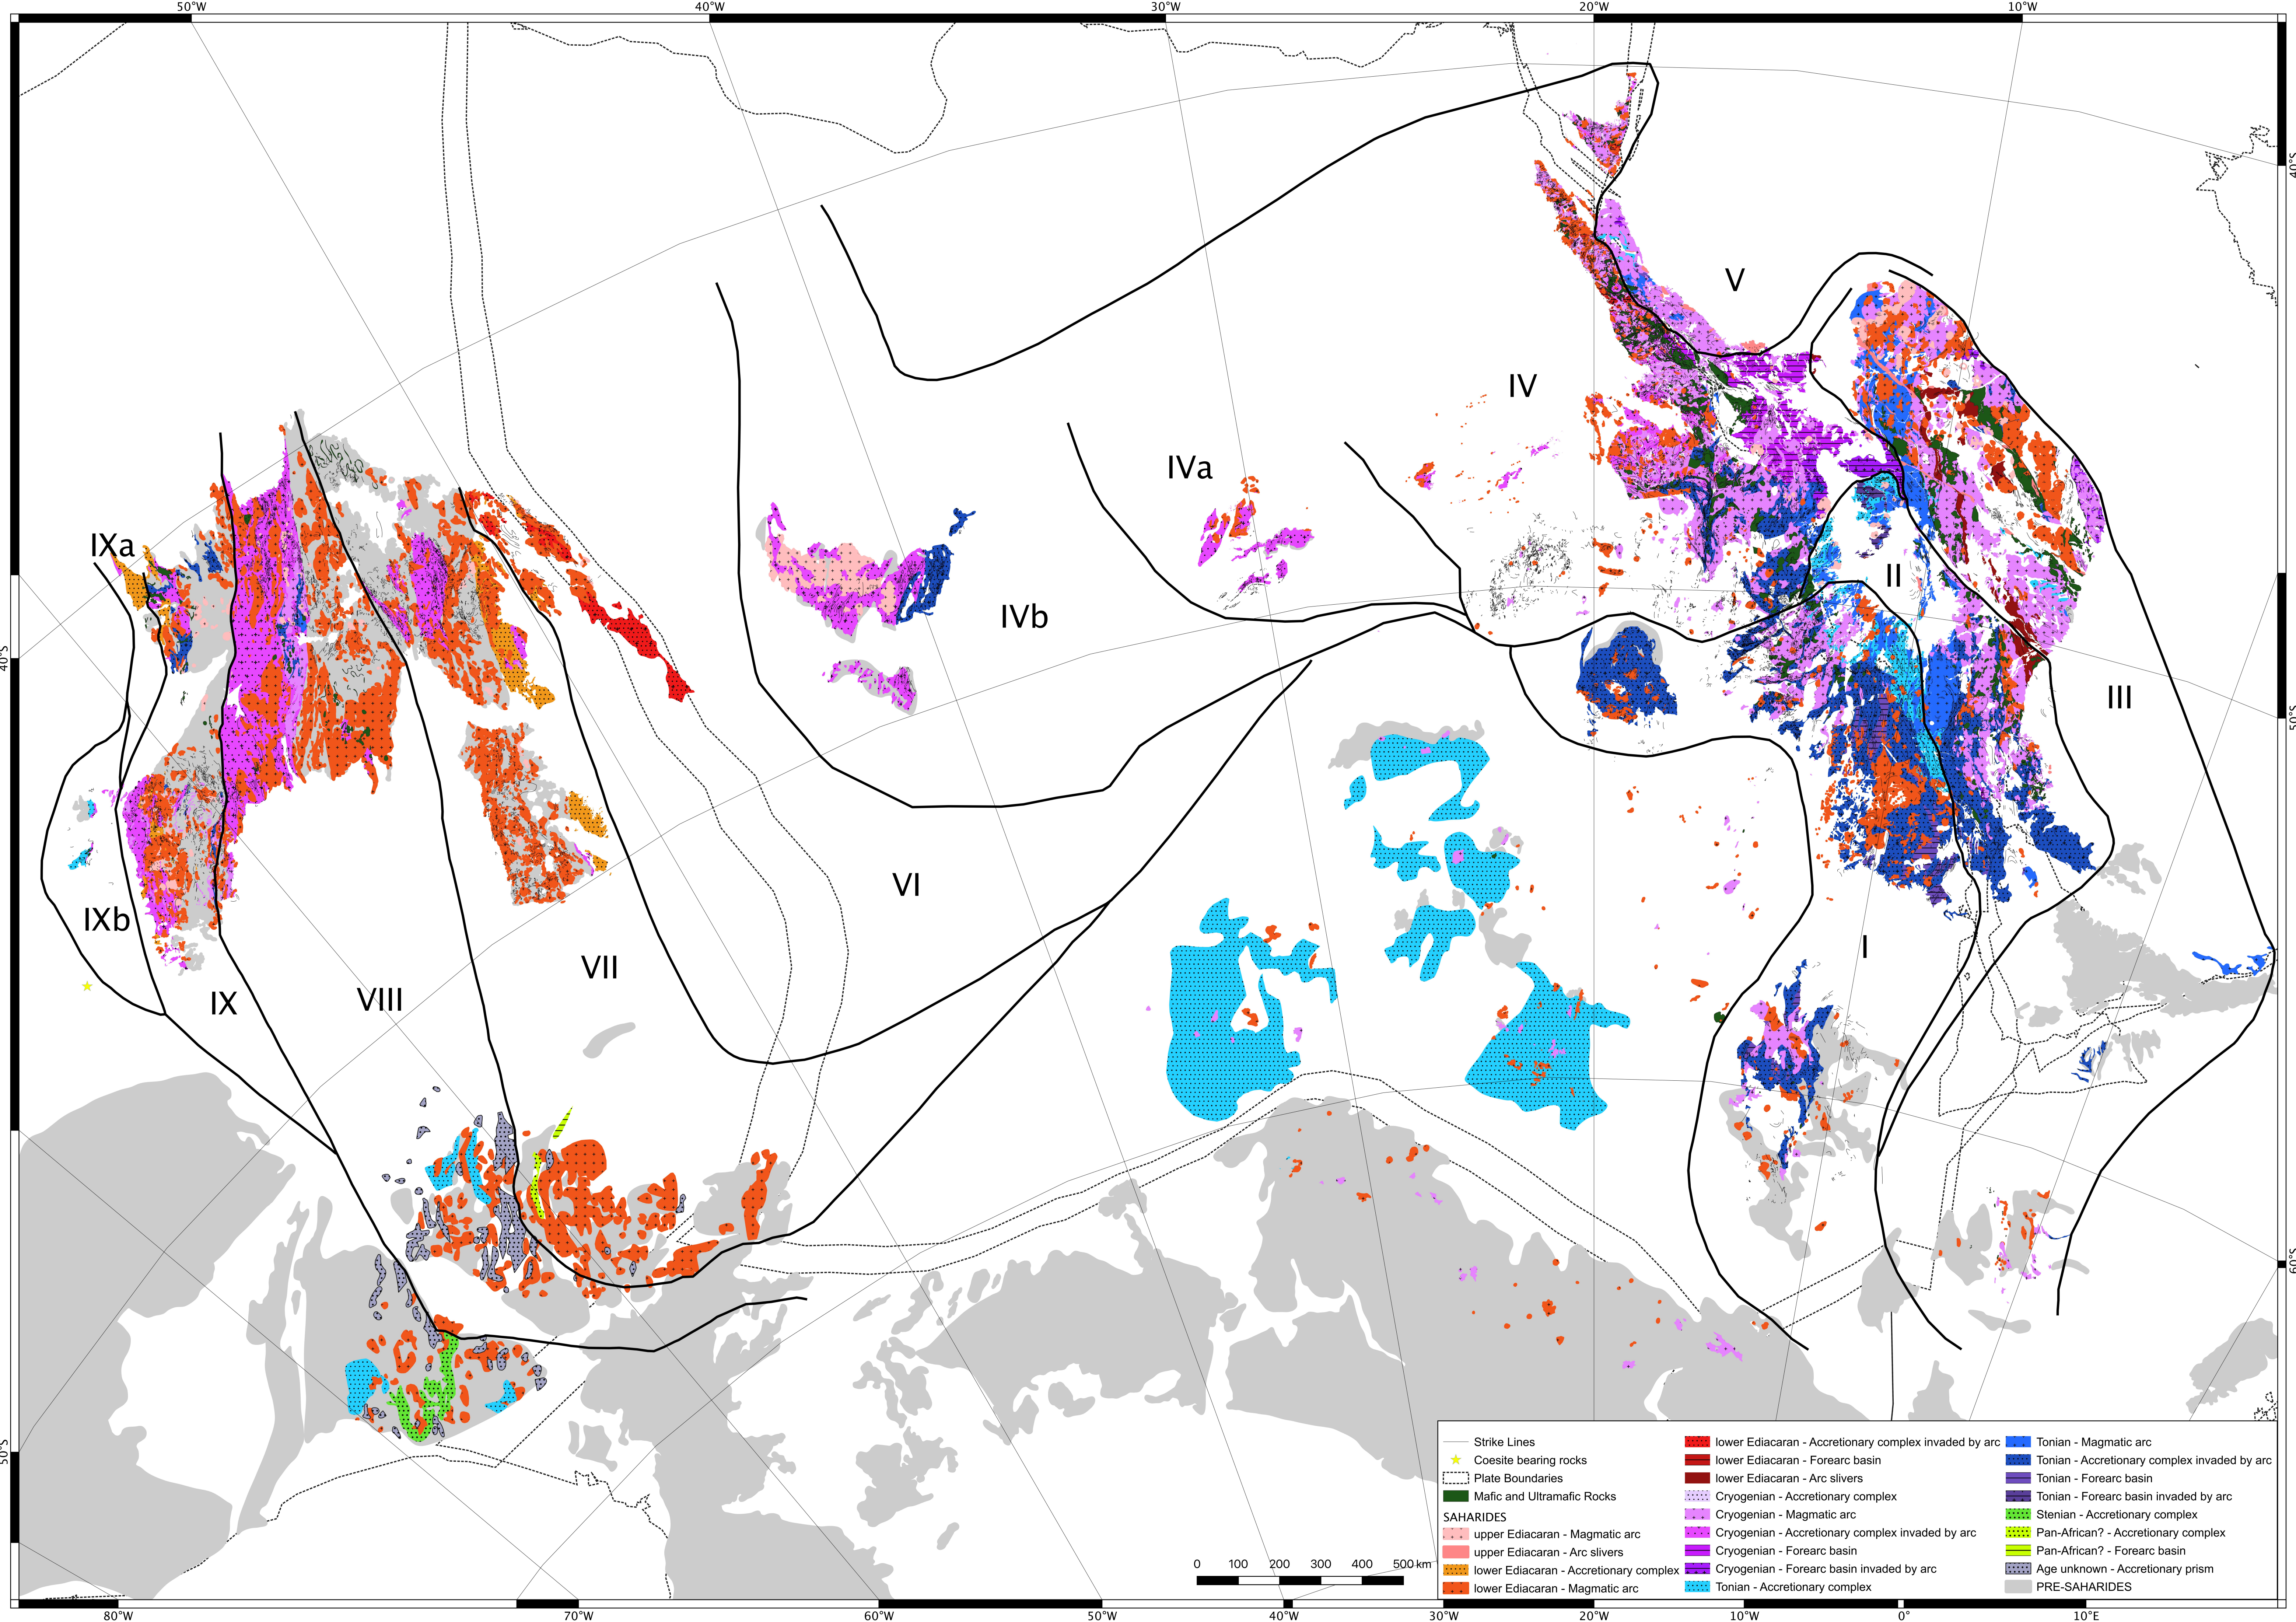

**Figure S1.** A tectonic map of the Saharides based on the identification of their tectonic environments. The Saharides are compiled from refs. 1-16 for Egypt, ref.17 for Saudi Arabia, ref.18 for Yemen, ref.19 for Sudan, ref. 20 for Ethiopia and Eretria, ref.21 for Tibesti ref. 22 for the rest. The Pre-Saharide units are generalised from ref.22, ref.18, and the refs. 23-25. All graphical features are plotted using the WGS 84 / Antarctic Polar Stereographic Projection (EPSG: 3031). The map was made on a reconstructed north Africa/Arabia ensemble using the data reported in Tables S1 and S2. GPlates freeware<sup>26</sup> was used for the reconstruction. 445 Ma reconstruction, as proxy to the Ediacaran reconstruction, is adapted from ref. 27.

**Table S1.** List of the isotopic age data

| NO | LON     | LAT     | ORG.* | COUNTRY | TECTONIC DIVISION     | UNIT                       | UNIT NAME                  | ROCK                              | METHOD | AGE (Ma) | MINERAL | AGETYPE     | MEANING     | TECTONIC ENVIRONMENT | CROSREF | ORGREF |
|----|---------|---------|-------|---------|-----------------------|----------------------------|----------------------------|-----------------------------------|--------|----------|---------|-------------|-------------|----------------------|---------|--------|
| 1  | 9.2500  | 14.0000 | fm    | Niger   | Trans-Saharan         | Damagaram                  | Birnin Kazoe heterogeneous | granite                           | Rb-Sr  | 580 ± 69 | WR      | isochrone   | emplacement | SYN-OROGENIC         |         | 28     |
| 2  | 9.5933  | 14.1447 | fm    | Niger   | Trans-Saharan         | Damagaram                  | Moha                       | fine-granied biotite monzogranite | Rb-Sr  | 530 ± 44 | WR      | isochrone   | emplacement | SYN-OROGENIC         |         | 28     |
| 3  | 9.0908  | 13.8769 | fm    | Niger   | Trans-Saharan         | Damagaram                  | Tyanza                     | granite                           | Rb-Sr  | 556 ± 63 | WR      | isochrone   | emplacement | SYN-OROGENIC         |         | 28     |
| 4  | 9.1019  | 14.0067 | fm    | Niger   | Trans-Saharan         | Damagaram                  | Dakousa                    | biotite muscovite syenogranite    | Rb-Sr  | 579 ± 14 | WR      | isochrone   | emplacement | SYN-OROGENIC         |         | 28     |
| 5  | 35.2000 | 23.7500 |       | Egypt   | Eastern Desert        | Wadi Shût                  | Tonalite pluton            | quartz diorite                    | U-Pb   | 711 ± 7  | zircon  | concordia   | emplacement | SYN-OROGENIC         |         | 29     |
| 6  | 32.2640 | 25.9440 | fm    | Egypt   | Eastern Desert        | Wadi Shût                  | Precambrian Shield         | tonalite to granodiorite          | Rb-Sr? | 612      | ?       | ?           | emplacement | ARC                  | 29      | 30     |
| 7  | 33.3060 | 25.5790 | fm    | Egypt   | Eastern Desert        | Wadi Shût                  | Precambrian Shield         | tonalite to granodiorite          | Rb-Sr? | 671      | ?       | ?           | emplacement | ARC                  | 29      | 30     |
| 8  | 33.7630 | 22.7560 | fm    | Egypt   | Eastern Desert        | Wadi Shût                  | Precambrian Shield         | tonalite to granodiorite          | Rb-Sr? | 761      | ?       | ?           | emplacement | ARC                  | 29      | 30     |
| 9  | 22.0833 | 26.6667 |       | Egypt   | East Saharan Craton   | Uweinat                    | Gebel Kamil migmatite      | leucocratic migmatite             | Rb-Sr  | 673 ± 56 | WR      | concordia   | emplacement | ?                    |         | 31     |
| 10 | 29.3330 | 22.9100 |       | Egypt   | East Saharan Craton   | Bir Safsaf                 | Pre Pan-African basement   | granite - microdiorite            | Rb-Sr  | 578 ± 9  | WR      | isochrone   | emplacement | POST-OROGENIC        |         | 31     |
| 11 | 30.0000 | 19.8330 |       | Sudan   | East Saharan Craton   | Nubian Desert microgranite | Pre Pan-African basement   | microgranite                      | Rb-Sr  | 623 ± 37 | WR      | isochrone   | emplacement | POST-OROGENIC        |         | 31     |
| 12 | 30.3330 | 19.8330 |       | Sudan   | East Saharan Craton   | Nubian Desert red granite  | Pre Pan-African basement   | granite                           | Rb-Sr  | 565 ± 8  | WR      | isochrone   | emplacement | POST-OROGENIC        |         | 31     |
| 13 | 29.5830 | 17.8330 |       | Sudan   | East Saharan Craton   | Wadi Howar East granite    | Pre Pan-African basement   | granite                           | Rb-Sr  | 562 ± 7  | WR      | isochrone   | emplacement | POST-OROGENIC        |         | 31     |
| 14 | 29.1660 | 17.7500 |       | Sudan   | East Saharan Craton   | Wadi Howar microgranites   | Pre Pan-African basement   | microgranite                      | Rb-Sr  | 585 ± 19 | WR      | isochrone   | emplacement | POST-OROGENIC        |         | 31     |
| 15 | 30.8160 | 20.4500 |       | Sudan   | Arabian-Nubian Shield | Delgo Sture Zone           | El Hamri ophiolite         | cumulate metagabbro               | Sm-Nd  | 752 ± 48 | WR      | isochrone   | formation   | OCEANIC              |         | 32     |
| 16 | 27.3680 | 18.0210 | cop   | Sudan   | Arabian-Nubian Shield | Zalingei Zone              | Jebel Rahib ophiolite      | isotropic gabbro                  | Sm-Nd  | 707 ± 54 | WR      | isochrone   | formation   | ARC                  |         | 32     |
| 17 | 30.5000 | 25.0830 |       | Egypt   | Arabian-Nubian Shield | Delgo Sture Zone           | Gneiss Basement            | tonalite                          | Pb-Pb  | 718 ± 11 | zircon  | evaporation | formation   | ARC                  |         | 32     |

| NO | LON     | LAT     | ORG.* | COUNTRY      | TECTONIC DIVISION     | UNIT                     | UNIT NAME                   | ROCK                      | METHOD | AGE (Ma) | MINERAL    | AGETYPE          | MEANING                | TECTONIC ENVIRONMENT | CROSREF | ORGREF |
|----|---------|---------|-------|--------------|-----------------------|--------------------------|-----------------------------|---------------------------|--------|----------|------------|------------------|------------------------|----------------------|---------|--------|
| 18 | 30.2660 | 20.3160 |       | Sudan        | Arabian-Nubian Shield | Delgo Sture Zone         | Eastern high-grade basement | deformed tonalite         | Pb-Pb  | 749 ± 12 | zircon     | evaporation      | formation              | ARC                  |         | 32     |
| 19 | 30.8160 | 20.5000 |       | Sudan        | Arabian-Nubian Shield | Delgo Sture Zone         | El Hamri complex            | granodiorite              | Pb-Pb  | 661 ± 12 | zircon     | evaporation      | formation              | ARC                  |         | 32     |
| 20 | 30.7830 | 20.4000 |       | Sudan        | Arabian-Nubian Shield | Delgo Sture Zone         | El Hamri complex            | tonalite                  | Pb-Pb  | 680 ± 12 | zircon     | evaporation      | formation              | ARC                  |         | 32     |
| 21 | 30.2660 | 20.3160 |       | Sudan        | Arabian-Nubian Shield | Delgo Sture Zone         | Sulb unit                   | calc-silicate rocks       | Sm-Nd  | 702 ± 27 | Gr-WR      | isochrone        | peak metamorphism      | METAMORPHISM         |         | 32     |
| 22 | 31.0830 | 20.0100 |       | Sudan        | Arabian-Nubian Shield | Delgo Sture Zone         | Eastern high-grade basement | garnet-biotite gneiss     | Sm-Nd  | 592 ± 16 | Gr-WR      | isochrone        | metamorphism           | METAMORPHISM         |         | 32     |
| 23 | 30.1160 | 20.0660 |       | Sudan        | Arabian-Nubian Shield | Delgo Sture Zone         | Eastern high-grade basement | high grade acidic gneiss  | Rb-Sr  | 546 ± 19 | WR         | isochrone        | metamorphism           | METAMORPHISM         |         | 32     |
| 24 | 27.0680 | 17.8090 | cop   | Sudan        | Arabian-Nubian Shield | Jebel Rahib              | Eastern Jebel Rahib Belt    | metagabbro                | K-Ar   | 860 ± 17 | hornblende |                  | formation              | OCEANIC              |         | 33     |
| 25 | 27.0680 | 17.8090 | cop   | Sudan        | Arabian-Nubian Shield | Jebel Rahib              | Eastern Jebel Rahib Belt    | metabasalt-pillow         | K-Ar   | 775 ± 16 | WR         |                  | formation              | OCEANIC              |         | 33     |
| 26 | 27.0680 | 17.8090 | cop   | Sudan        | Arabian-Nubian Shield | Jebel Rahib              | Eastern Jebel Rahib Belt    | metabasalt-pillow         | K-Ar   | 740 ± 15 | WR         |                  | formation              | OCEANIC              |         | 33     |
| 27 | 27.0680 | 17.8090 | cop   | Sudan        | Arabian-Nubian Shield | Jebel Rahib              | Western Jebel Rahib Belt    | granitic metasediment     | K-Ar   | 555 ± 24 | biotite    |                  | contact metamorphism   | LATE/POST-OROGENIC   |         | 33     |
| 28 | 42.2050 | 19.9940 |       | Saudi Arabia | Arabian-Nubian Shield | Wadi Ta'al Shear Zone    | Central Tabalah area        | hornblende schist         | Ar-Ar  | 765 ± 5  | hornblende | stepwise heating | dextral strike-slip    | FAULTING             |         | 34     |
| 29 | 42.2450 | 20.0200 |       | Saudi Arabia | Arabian-Nubian Shield | Wadi Ta'al Shear Zone    | Central Tabalah area        | hornblende schist         | Ar-Ar  | 764 ± 7  | hornblende | stepwise heating | dextral strike-slip    | FAULTING             |         | 34     |
| 30 | 42.3630 | 19.7210 |       | Saudi Arabia | Arabian-Nubian Shield | Tabalah Ta'al Shear Zone | Wadi Tarj area              | hornblende schist         | Ar-Ar  | 779 ± 7  | hornblende | stepwise heating | WSW directed thrusting | FAULTING             |         | 34     |
| 31 | 42.3160 | 19.6830 |       | Saudi Arabia | Arabian-Nubian Shield | Tabalah Ta'al Shear Zone | Wadi Tarj area              | non-deformed granodiorite | Ar-Ar  | 761 ± 6  | hornblende | isochrone        | emplacement            | ARC                  |         | 34     |
| 32 | 43.8150 | 20.0810 |       | Saudi Arabia | Arabian-Nubian Shield | Arabian Shield           | Murdama Group               | rhyolite                  | Rb-Sr  | 568± 29  | WR         | isochrone        | formation              | POST-OROGENIC        |         | 35     |
| 33 | 42.8500 | 20.1360 |       | Saudi Arabia | Arabian-Nubian Shield | Arabian Shield           | Junaynah quadrangle         | meta-andesite             | Rb-Sr  | 785± 96  | WR         | isochrone        | formation              | ARC                  |         | 35     |
| 34 | 43.7510 | 17.6800 |       | Saudi Arabia | Arabian-Nubian Shield | Arabian Shield           | Wadi Shuklalah              | metavolcanic              | Rb-Sr  | 593± 53  | WR         | isochrone        | formation              | POST-OROGENIC        |         | 35     |
| 35 | 42.1500 | 19.2500 |       | Saudi Arabia | Arabian-Nubian Shield | Arabian Shield           | Wadi bin Dwaynah            | metavolcanic              | Rb-Sr  | 912± 76  | WR         | isochrone        | formation              | ARC                  |         | 35     |
| 36 | 42.9660 | 19.1330 |       | Saudi Arabia | Arabian-Nubian Shield | Arabian Shield           | Khadrah Formation           | metavolcanic              | Rb-Sr  | 746± 16  | WR         | isochrone        | formation              | ARC                  |         | 35     |
| 37 | 42.6200 | 20.6400 |       | Saudi Arabia | Arabian-Nubian Shield | Arabian Shield           | Hishat al Hawi              | metavolcanic              | Rb-Sr  | 660± 43  | WR         | isochrone        | formation              | ARC                  | 35      | 36     |

| NO | LON     | LAT     | ORG.<br>* | COUNTRY         | TECTONIC<br>DIVISION      | UNIT           | UNIT NAME                | ROCK                   | METHOD | AGE (Ma) | MINERAL | AGETYPE   | MEANING   | TECTONIC<br>ENVIRONMENT | CROSRE<br>F | ORGREF |
|----|---------|---------|-----------|-----------------|---------------------------|----------------|--------------------------|------------------------|--------|----------|---------|-----------|-----------|-------------------------|-------------|--------|
| 38 | 43.8930 | 21.0660 |           | Saudi<br>Arabia | Arabian-<br>Nubian Shield | Arabian Shield | Arphan Formation         | rhyolite               | Rb-Sr  | 761± 23  | WR      | isochrone | intrusion | ARC                     | 35          | 36     |
| 39 | 43.7250 | 21.4200 |           | Saudi<br>Arabia | Arabian-<br>Nubian Shield | Arabian Shield | Juquq Formation          | pyroxene<br>andesite   | Rb-Sr  | 620± 95  | WR      | isochrone | intrusion | LATE-OROGENIC           |             | 35     |
| 40 | 41.6160 | 19.9160 |           | Saudi<br>Arabia | Arabian-<br>Nubian Shield | Arabian Shield | Biljurshi                | quartz diorite         | Rb-Sr  | 890± 67  | WR      | isochrone | intrusion | ARC                     |             | 35     |
| 41 | 41.5810 | 19.9060 |           | Saudi<br>Arabia | Arabian-<br>Nubian Shield | Arabian Shield | Biljurshi                | quartz diorite         | Rb-Sr  | 848±282  | WR      | isochrone | intrusion | ARC                     |             | 35     |
| 42 | 40.1420 | 20.5150 |           | Saudi<br>Arabia | Arabian-<br>Nubian Shield | Arabian Shield | Wadi Khadrah             | quartz diorite         | Rb-Sr  | 895±173  | WR      | isochrone | intrusion | ARC                     |             | 35     |
| 43 | 40.9260 | 20.3430 |           | Saudi<br>Arabia | Arabian-<br>Nubian Shield | Arabian Shield | Wadi ash                 | quartz diorite         | Rb-Sr  | 853± 72  | WR      | isochrone | intrusion | ARC                     |             | 35     |
| 44 | 42.2000 | 19.0500 |           | Saudi<br>Arabia | Arabian-<br>Nubian Shield | Arabian Shield | An Nimas                 | quartz diorite         | Rb-Sr  | 837± 50  | WR      | isochrone | intrusion | ARC                     |             | 35     |
| 45 | 42.2480 | 19.7330 |           | Saudi<br>Arabia | Arabian-<br>Nubian Shield | Arabian Shield | Wadi Tarj                | quartz diorite         | Rb-Sr  | 818± 95  | WR      | isochrone | intrusion | ARC                     |             | 35     |
| 46 | 41.9750 | 19.6000 |           | Saudi<br>Arabia | Arabian-<br>Nubian Shield | Arabian Shield | Al Mushirah              | quartz diorite         | Rb-Sr  | 747±178  | WR      | isochrone | intrusion | ARC                     |             | 35     |
| 47 | 42.9050 | 20.0600 |           | Saudi<br>Arabia | Arabian-<br>Nubian Shield | Arabian Shield | Jabal Umm al<br>Hashiyah | quartz diorite         | Rb-Sr  | 723±107  | WR      | isochrone | intrusion | ARC                     |             | 35     |
| 48 | 43.1410 | 20.1480 |           | Saudi<br>Arabia | Arabian-<br>Nubian Shield | Arabian Shield | Al Qarah<br>quadrangle   | quartz diorite         | Rb-Sr  | 724± 93  | WR      | isochrone | intrusion | ARC                     |             | 35     |
| 49 | 43.9900 | 21.2750 |           | Saudi<br>Arabia | Arabian-<br>Nubian Shield | Arabian Shield | Jabal Yafikh             | hornblende<br>diorite  | Rb-Sr  | 522±429  | WR      | isochrone | intrusion | POST-<br>OROGENIC       | 35          | 36     |
| 50 | 44.0000 | 18.3660 |           | Saudi<br>Arabia | Arabian-<br>Nubian Shield | Arabian Shield | Wadi Makhdhul            | quartz diorite         | Rb-Sr  | 843 ±273 | WR      | isochrone | intrusion | ARC                     |             | 35     |
| 51 | 44.0660 | 18.3830 |           | Saudi<br>Arabia | Arabian-<br>Nubian Shield | Arabian Shield | Wadi Malahah             | granodiorite           | Rb-Sr  | 684± 43  | WR      | isochrone | intrusion | ARC                     |             | 35     |
| 52 | 42.2170 | 19.0160 |           | Saudi<br>Arabia | Arabian-<br>Nubian Shield | Arabian Shield | Jabal Mina               | granodiorite<br>gneiss | Rb-Sr  | 746±114  | WR      | isochrone | intrusion | ARC                     |             | 35     |
| 53 | 42.6680 | 18.4450 |           | Saudi<br>Arabia | Arabian-<br>Nubian Shield | Arabian Shield | Wadi Bishah              | granitic gneiss        | Rb-Sr  | 664± 9   | WR      | isochrone | intrusion | ARC                     |             | 35     |
| 54 | 42.0330 | 18.7330 |           | Saudi<br>Arabia | Arabian-<br>Nubian Shield | Arabian Shield | Wadi Bagarah             | granodiorite<br>gneiss | Rb-Sr  | 763± 53  | WR      | isochrone | intrusion | ARC                     |             | 35     |
| 55 | 39.2670 | 21.5210 |           | Saudi<br>Arabia | Arabian-<br>Nubian Shield | Arabian Shield | Jiddah Airport           | granitic gneiss        | Rb-Sr  | 763±159  | WR      | isochrone | intrusion | ARC                     |             | 35     |
| 56 | 42.8680 | 18.3417 |           | Saudi<br>Arabia | Arabian-<br>Nubian Shield | Arabian Shield | Tindahah batholith       | granodiorite           | Rb-Sr  | 626± 17  | WR      | isochrone | intrusion | ARC                     | 35          | 37     |
| 57 | 41.8750 | 19.8000 |           | Saudi<br>Arabia | Arabian-<br>Nubian Shield | Arabian Shield | Wadi Shuwas              | quartz<br>monzonite    | Rb-Sr  | 636± 21  | WR      | isochrone | intrusion | ARC                     |             | 35     |
| 58 | 42.1183 | 18.8030 |           | Saudi<br>Arabia | Arabian-<br>Nubian Shield | Arabian Shield | Jabal Qal                | quartz<br>monzonite    | Rb-Sr  | 620± 18  | WR      | isochrone | intrusion | LATE-OROGENIC           |             | 35     |

| NO | LON     | LAT     | ORG.* | COUNTRY        | TECTONIC DIVISION        | UNIT                | UNIT NAME                              | ROCK                       | METHOD | AGE (Ma)     | MINERAL | AGETYPE     | MEANING   | TECTONIC ENVIRONMENT | CROSREF | ORGREF |
|----|---------|---------|-------|----------------|--------------------------|---------------------|----------------------------------------|----------------------------|--------|--------------|---------|-------------|-----------|----------------------|---------|--------|
| 59 | 43.8183 | 17.6030 |       | Saudi Arabia   | Arabian-Nubian Shield    | Arabian Shield      | Wadi Halal                             | granodiorite               | Rb-Sr  | 643 ± 20     | WR      | isochrone   | intrusion | ARC                  |         | 35     |
| 60 | 42.7150 | 20.6780 |       | Saudi Arabia   | Arabian-Nubian Shield    | Arabian Shield      | Wadi al Miyah                          | granodiorite               | Rb-Sr  | 587± 99      | WR      | isochrone   | intrusion | LATE-OROGENIC        |         | 35     |
| 61 | 42.9533 | 20.2780 |       | Saudi Arabia   | Arabian-Nubian Shield    | Arabian Shield      | Wadi Musayrah                          | granodiorite               | Rb-Sr  | 623± 18      | WR      | isochrone   | intrusion | ARC                  |         | 35     |
| 62 | 41.9013 | 20.2240 |       | Saudi Arabia   | southern Arabian shield  | Asir terrane        | Ablah group                            | rhyolite                   | U-Pb   | 613±7        | zircon  | SHRIMP-RG   | formation | ARC                  |         | 38     |
| 63 | 41.8542 | 20.1528 |       | Saudi Arabia   | southern Arabian shield  | Asir terrane        | Ablah group                            | rhyolite                   | Pb-Pb  | 641 ±1       | zircon  | evaporation | formation | ARC                  |         | 39     |
| 64 | 42.1903 | 20.1690 |       | Saudi Arabia   | southern Arabian shield  | Asir terrane        | Al Khalij pluton                       | granitoid                  | U-Pb   | 755±7        | zircon  | SHRIMP-RG   | intrusion | ARC                  |         | 38     |
| 65 | 42.7003 | 19.3990 |       | Saudi Arabia   | southern Arabian shield  | Asir terrane        | Hadabah pluton                         | granitoid                  | U-Pb   | 606±2        | zircon  | SHRIMP-RG   | intrusion | LATE-OROGENIC        |         | 38     |
| 66 | 42.8019 | 20.0720 |       | Saudi Arabia   | southern Arabian shield  | Asir terrane        | Nunaynah                               | granite                    | U-Pb   | 646± 10      | zircon  | SHRIMP-RG   | intrusion | LATE-OROGENIC        |         | 38     |
| 67 | 42.9310 | 20.1825 |       | Saudi Arabia   | southern Arabian shield  | Asir terrane        | Musayrah pluton                        | granitoid                  | U-Pb   | 654±3        | zircon  | SHRIMP-RG   | intrusion | LATE-OROGENIC        |         | 38     |
| 68 | 43.1658 | 20.2736 |       | Saudi Arabia   | southern Arabian shield  | Asir terrane        | Abss                                   | granodiorite               | U-Pb   | 651±4        | zircon  | SHRIMP-RG   | intrusion | LATE-OROGENIC        |         | 38     |
| 69 | 43.4477 | 20.1160 |       | Saudi Arabia   | southern Arabian shield  | Asir terrane        | Ash Shawhatah pluton                   | granitoid                  | U-Pb   | 640±3        | zircon  | SHRIMP-RG   | intrusion | LATE-OROGENIC        |         | 38     |
| 70 | 43.6088 | 19.5271 |       | Saudi Arabia   | southern Arabian shield  | Asir terrane        | Tathlith gneiss                        | gneiss                     | U-Pb   | 652±2        | zircon  | SHRIMP-RG   | intrusion | LATE-OROGENIC        |         | 38     |
| 71 | 32.9370 | 18.1550 | cop   | Sudan          | Mozambique Orogenic Belt | East Saharan Craton | Bayuda Desert basement                 | metavolcanic (amphibolite) | Sm-Nd  | 806 ± 19     | WR      | isochrone   | intrusion | ARC                  |         | 40     |
| 72 | 8.8610  | 19.5590 | fm    | Niger Republic | Tuareg shield            | Air Massif          | Emzeggar (Dabaga) calc-alk. granitoids | monzogranite               | U-Pb   | 714 ±19 /-18 | zircon  | isochrone   | intrusion | LATE-OROGENIC        |         | 41     |
| 73 | 9.7980  | 17.5080 | fm    | Niger Republic | Tuareg shield            | Air Massif          | Proche-Tenere                          | alkaline rhyolitic dykes   | Rb-Sr  | 529 ± 11     | WR      | isochrone   | intrusion | INTRA-PLATE          |         | 41     |
| 74 | 8.1440  | 17.3290 | fm    | Niger Republic | Tuareg shield            | Air Massif          | Dabaga Forest                          | monzogranite               | U-Pb   | 643 ±11/ -10 | zircon  | isochrone   | intrusion | LATE-OROGENIC        |         | 41     |
| 75 | 8.2410  | 19.3320 | fm    | Niger Republic | Tuareg shield            | Air Massif          | Teggar                                 | monzogranite               | Rb-Sr  | 586 ± 93     | WR      | isochrone   | intrusion | LATE-OROGENIC        |         | 41     |
| 76 | 8.5230  | 18.7220 | fm    | Niger Republic | Tuareg shield            | Air Massif          | Iferouane                              | monzogranite               | Rb-Sr  | 602 ± -14    | WR      | isochrone   | intrusion | LATE-OROGENIC        |         | 41     |
| 77 | 8.0140  | 18.7600 | fm    | Niger Republic | Tuareg shield            | Air Massif          | Renatt anatectie                       | leucocratic granite        | Rb-Sr  | 666 ± 11     | WR      | isochrone   | intrusion | LATE-OROGENIC        |         | 41     |
| 78 | 9.2340  | 17.4380 | fm    | Niger Republic | Tuareg shield            | Air Massif          | Takarakoum pluton                      | granite                    | Rb-Sr  | 701 ±26      | WR      | isochrone   | intrusion | POST-OROGENIC        | 41      | 42     |
| 79 | 9.0770  | 17.3910 | fm    | Niger Republic | Tuareg shield            | Air Massif          | Beurhot batholith                      | granite                    | Rb-Sr  | 698 ± 21     | WR      | isochrone   | intrusion | POST-OROGENIC        | 41      | 42     |

| NO | LON     | LAT     | ORG.* | COUNTRY                  | TECTONIC DIVISION | UNIT                            | UNIT NAME            | ROCK                             | METHOD | AGE (Ma)  | MINERAL | AGETYPE   | MEANING                        | TECTONIC ENVIRONMENT | CROSREF | ORGREF |
|----|---------|---------|-------|--------------------------|-------------------|---------------------------------|----------------------|----------------------------------|--------|-----------|---------|-----------|--------------------------------|----------------------|---------|--------|
| 80 | 9.3580  | 17.6520 | fm    | Niger Republic           | Tuareg shield     | Air Massif                      | Tchebarlare pluton   | granite                          | U-Pb   | 664 ± 8   | zircon  | isochrone | intrusion                      | POST-OROGENIC        |         | 41     |
| 81 | 15.3333 | 23.5833 | cop   | Libya                    | Saharan Craton    | Tibesti Massif                  | Ben Ghnema batholith | granite                          | Rb-Sr  | 586± 27   | Bt-WR   | isochrone | intrusion                      | ARC                  |         | 43     |
| 82 | 15.4167 | 23.3333 | cop   | Libya                    | Saharan Craton    | Tibesti Massif                  | Ben Ghnema batholith | granite                          | Rb-Sr  | 550± 11   | Bt-WR   | isochrone | intrusion                      | ARC                  |         | 43     |
| 83 | 15.5000 | 22.7500 | cop   | Libya                    | Saharan Craton    | Tibesti Massif                  | Ben Ghnema batholith | pegmatites                       | Rb-Sr  | 533± 5    | Ms-WR   | isochrone | intrusion                      | ARC                  |         | 43     |
| 84 | 19.1250 | 23.1620 | cop   | Libya                    | Saharan Craton    | Super Tibestian magmatic series | Kangara pluton       | alkali granite                   | Rb-Sr  | 560±4     | WR      | isochrone | intrusion                      | POST-OROGENIC        |         | 43     |
| 85 | 17.5170 | 6.0550  | fm    | Central African Republic | Congo Craton      | the Oubanguides belt            | Mpoko granulite      | granulite charnockitic affinit   | U-Pb   | 833 ±66   | zircon  | isochrone | intrusion ?<br>Granulite met.? | METAMORPHISM         |         | 44     |
| 86 | 17.2640 | 6.7740  | fm    | Central African Republic | Congo Craton      | the Oubanguides belt            | Lere granulite       | granulite charnockitic affinit   | U-Pb   | 652 ±19   | zircon  | isochrone | intrusion ?<br>Granulite met.? | METAMORPHISM         |         | 44     |
| 87 | 19.0390 | 5.8120  | fm    | Central African Republic | Congo Craton      | the Oubanguides belt            | Sibut granulite      | granulite charnockitic affinit   | U-Pb   | 639 ±3 Ma | zircon  | isochrone | intrusion ?<br>Granulite met.? | METAMORPHISM         |         | 44     |
| 88 | 39.5500 | 21.5500 |       | Saudi Arabia             | Arabian Shield    | Arabian Shield                  | Fatima               | granite                          | Rb-Sr  | 773± 16   | WR      | isochrone | intrusion                      | SYN-OROGENIC         |         | 45     |
| 89 | 39.5833 | 21.5167 |       | Saudi Arabia             | Arabian Shield    | Arabian Shield                  | Fatima volcanics     | andesite to rhyolite             | Rb-Sr  | 675 ±17   | WR      | isochrone | formation                      | POST-OROGENIC        |         | 45     |
| 90 | 38.8833 | 23.5500 |       | Saudi Arabia             | Arabian Shield    | Arabian Shield                  | Hamra                | tonalite                         | Rb-Sr  | 641 ±218  | WR      | isochrone | intrusion                      | POST-OROGENIC        |         | 45     |
| 91 | 38.9333 | 23.7500 |       | Saudi Arabia             | Arabian Shield    | Arabian Shield                  | Hamra                | alkali granite                   | Rb-Sr  | 686 ±26   | WR      | isochrone | intrusion                      | POST-OROGENIC        |         | 45     |
| 92 | 38.9167 | 23.8833 |       | Saudi Arabia             | Arabian Shield    | Arabian Shield                  | Badr volcanics       | basaltic andesites and rhyolites | Rb-Sr  | 659 ±38   | WR      | isochrone | formation                      | POST-OROGENIC        |         | 45     |
| 93 | 41.2500 | 25.5833 |       | Saudi Arabia             | Arabian Shield    | Arabian Shield                  | Nuqrah               | granite                          | Rb-Sr  | 635± 18   | WR      | isochrone | intrusion                      | POST-OROGENIC        |         | 45     |
| 94 | 41.2667 | 25.6333 |       | Saudi Arabia             | Arabian Shield    | Arabian Shield                  | Nuqrah volcanics     | diabase?                         | Rb-Sr  | 625 ±16   | WR      | isochrone | intrusion                      | POST-OROGENIC        |         | 45     |
| 95 | 35.5833 | 28.0000 |       | Saudi Arabia             | Arabian Shield    | Arabian Shield                  | Midian               | peralkaline granite              | Rb-Sr  | 586 ± 11  | WR      | isochrone | intrusion                      | POST-OROGENIC        |         | 45     |
| 96 | 37.6450 | 26.3900 |       | Saudi Arabia             | Arabian Shield    | Northwestern Shield             | Jabal Ess            | trondhjemite                     | U-Pb   | 706± 11   | zircon  | isochrone | intrusion                      | ARC                  |         | 46     |
| 97 | 37.6967 | 26.3733 |       | Saudi Arabia             | Arabian Shield    | Northwestern Shield             | Jabal Ess            | gabbro                           | U-Pb   | 780± 11   | zircon  | isochrone | intrusion                      | ARC                  |         | 46     |

| NO  | LON     | LAT     | ORG.<br>* | COUNTRY      | TECTONIC<br>DIVISION | UNIT                | UNIT NAME                     | ROCK           | METHOD | AGE (Ma) | MINERAL | AGETYPE   | MEANING   | TECTONIC<br>ENVIRONMENT | CROSRE<br>F | ORGREF                                 |
|-----|---------|---------|-----------|--------------|----------------------|---------------------|-------------------------------|----------------|--------|----------|---------|-----------|-----------|-------------------------|-------------|----------------------------------------|
| 98  | 37.7900 | 25.0200 |           | Saudi Arabia | Arabian Shield       | Northwestern Shield | Jabal al Wask                 | gabbro         | U-Pb   | 751 ± 11 | zircon  | isochrone | intrusion | ARC                     |             | 46                                     |
| 99  | 38.0300 | 25.2533 |           | Saudi Arabia | Arabian Shield       | Northwestern Shield | Jabal al Wask                 | plagiogranite  | U-Pb   | 740± 11  | zircon  | isochrone | intrusion | ARC                     |             | 46                                     |
| 100 | 37.7683 | 24.7717 |           | Saudi Arabia | Arabian Shield       | Northwestern Shield | Salajah                       | tonalite       | U-Pb   | 696 ±5   | zircon  | isochrone | intrusion | ARC                     |             | 46                                     |
| 101 | 39.3967 | 22.6367 |           | Saudi Arabia | Arabian Shield       | West-central Shield | Thurwah                       | gabbro         | U-Pb   | 870± 11  | zircon  | isochrone | intrusion | ARC                     |             | 46                                     |
| 102 | 40.8817 | 23.9133 |           | Saudi Arabia | Arabian Shield       | West-central Shield | Bir Umq Sture                 | metadiorite    | U-Pb   | 838± 10  | zircon  | isochrone | formation | ARC                     |             | 46                                     |
| 103 | 40.8050 | 25.6750 |           | Saudi Arabia | Arabian Shield       | Nabitah suture      | Tuluhah                       | plagiogranite  | U-Pb   | 823 ± 11 | zircon  | isochrone | formation | ARC                     |             | 46                                     |
| 104 | 41.9417 | 23.4267 |           | Saudi Arabia | Arabian Shield       | Nabitah suture      | Ad Dafinah                    | quartz diorite | U-Pb   | 732 ± 27 | zircon  | isochrone | formation | ARC                     |             | 46                                     |
| 105 | 43.5733 | 19.5817 |           | Saudi Arabia | Arabian Shield       | Nabitah suture      | Tathlith                      | gabbro         | U-Pb   | 627± 4   | zircon  | isochrone | intrusion | ARC                     |             | 46                                     |
| 106 | 44.6483 | 24.3450 |           | Saudi Arabia | Arabian Shield       | Eastern Shield      | Ar Ridaniyah                  | metadacite     | U-Pb   | 766 ± 7  | zircon  | isochrone | formation | ARC                     |             | 46                                     |
| 107 | 43.3440 | 23.5260 |           | Saudi Arabia | Arabian Shield       | Eastern Shield      | Urd                           | gabbro         | U-Pb   | 694 ± 8  | zircon  | isochrone | intrusion | ARC                     |             | 46                                     |
| 108 | 37.5360 | 26.2560 | fm        | Saudi Arabia | Arabian Shield       | Arabian Shield      | Midyan arc basement           | gabbro         | Sm-Nd  | 782 ± 38 | WR      | isochrone | intrusion | ARC                     | 46          | 47                                     |
| 109 | 37.8930 | 25.0280 | fm        | Saudi Arabia | Arabian Shield       | Arabian Shield      | Midyan arc basement           | gabbro         | Sm-Nd  | 743 ± 24 | WR      | isochrone | intrusion | ARC                     | 46          | 47                                     |
| 110 | 38.2560 | 25.4350 | fm        | Saudi Arabia | Arabian Shield       | Arabian Shield      | Midyan arc basement           | tonalite       | U-Pb   | 743 ± 10 | zircon  | ID-TIMS   | intrusion | ARC                     | 46          | 48                                     |
| 111 | 37.7950 | 25.4030 | fm        | Saudi Arabia | Arabian Shield       | Arabian Shield      | Midyan arc basement           | tonalite       | U-Pb   | 720 ± 05 | zircon  | ID-TIMS   | intrusion | ARC                     | 46          | 48                                     |
| 112 | 41.2460 | 25.6470 | fm        | Saudi Arabia | Arabian Shield       | Arabian Shield      | Midyan arc basement           | Na-rhyolite    | U-Pb   | 839 ± 23 | zircon  | ID-TIMS   | intrusion | ARC                     | 46          | 48                                     |
| 113 | 41.4680 | 23.5770 | fm        | Saudi Arabia | Arabian Shield       | Arabian Shield      | Arc basement                  | tonalite       | U-Pb   | 760 ± 10 | zircon  | ID-TIMS   | intrusion | ARC                     | 46          | 48                                     |
| 114 | 41.0390 | 23.3540 | fm        | Saudi Arabia | Arabian Shield       | Arabian Shield      | Arc basement                  | tonalite       | U-Pb   | 816 ± 03 | zircon  | ID-TIMS   | intrusion | ARC                     | 46          | 48                                     |
| 115 | 40.3290 | 20.4650 | fm        | Saudi Arabia | Arabian Shield       | Arabian Shield      | Arc basement                  | metavolcanics  | Rb-Sr  | 821 ± 19 | WR      | isochrone | intrusion | ARC                     | 46          | 49                                     |
| 116 | 40.7390 | 20.9400 | fm        | Saudi Arabia | Arabian Shield       | Arabian Shield      | Arc basement                  | metavolcanics  | Rb-Sr  | 847 ± 34 | WR      | isochrone | intrusion | ARC                     | 46          | 49                                     |
| 117 | 41.5780 | 23.8060 | fm        | Saudi Arabia | Arabian Shield       | Arabian Shield      | Deformation zone along suture | granodiorite   | U-Pb   | 815 ± 09 | zircon  | ?         | intrusion | SYN-OROGENIC            | 46          | J.S. Stacey, unpublished data as cited |



| NO  | LON     | LAT     | ORG.<br>* | COUNTRY         | TECTONIC<br>DIVISION | UNIT                    | UNIT NAME                        | ROCK                                     | METHOD | AGE (Ma)  | MINERAL | AGETYPE | MEANING   | TECTONIC<br>ENVIRONMENT | CROSRE<br>F | ORGREF                                         |
|-----|---------|---------|-----------|-----------------|----------------------|-------------------------|----------------------------------|------------------------------------------|--------|-----------|---------|---------|-----------|-------------------------|-------------|------------------------------------------------|
| 118 | 42.6580 | 21.2990 | fm        | Saudi<br>Arabia | Arabian Shield       | Arabian Shield          | Deformation zone<br>along suture | tonalite gneiss                          | U-Pb   | 728 ± 10  | zircon  | ?       | intrusion | SYN-OROGENIC            | 46          | J.S. Stacey,<br>unpublished<br>data as cited   |
| 119 | 45.2610 | 24.0830 | fm        | Saudi<br>Arabia | Arabian Shield       | Arabian Shield          | Al Amar Suture                   | trondhjemite                             | U-Pb   | 667 ± 17  | zircon  | ID-TIMS | intrusion |                         | 46          | Calvez et al.<br>(in prep., as<br>cited by 46) |
| 120 | 45.3050 | 23.2917 |           | Saudi<br>Arabia | Arabian Shield       | Arabian Shield          | Ar Rayn province                 | tonalite                                 | U-Pb   | 650 ± 09  | zircon  | ID-TIMS | intrusion | ARC                     |             | 50                                             |
| 121 | 44.0967 | 23.6083 |           | Saudi<br>Arabia | Arabian Shield       | Afif province           | As Sawda domain                  | bt-hb tonalite                           | U-Pb   | 677 ± 9   | zircon  | ID-TIMS | intrusion |                         |             | 50                                             |
| 122 | 44.3200 | 23.5333 |           | Saudi<br>Arabia | Arabian Shield       | Ad Dawadimi<br>province | Urd group ophiolite              | hypersthene<br>gabbro                    | U-Pb   | 694 ± 8   | zircon  | ID-TIMS | intrusion | OCEANIC                 |             | 50                                             |
| 123 | 44.4000 | 23.8150 |           | Saudi<br>Arabia | Arabian Shield       | Ad Dawadimi<br>province | Ar Rukhaman                      | two mica<br>monzogranite                 | U-Pb   | 641 ± 25  | zircon  | ID-TIMS | intrusion | POST-<br>OROGENIC       |             | 50                                             |
| 124 | 44.6000 | 23.2550 |           | Saudi<br>Arabia | Arabian Shield       | Ad Dawadimi<br>province | Jabal Sabbah                     | two mica<br>monzogranite                 | U-Pb   | 607 ± 19  | zircon  | ID-TIMS | intrusion | POST-<br>OROGENIC       |             | 50                                             |
| 125 | 44.7150 | 23.5983 |           | Saudi<br>Arabia | Arabian Shield       | Ad Dawadimi<br>province | Jabal Khura                      | bt<br>monzogranite                       | U-Pb   | 598 ± 35  | zircon  | ID-TIMS | intrusion | POST-<br>OROGENIC       |             | 50                                             |
| 126 | 45.1833 | 23.8550 |           | Saudi<br>Arabia | Arabian Shield       | Ar Rayn<br>province     | Al Amar volcanics                | biotite-<br>hornblende<br>quartz diorite | U-Pb   | 633 ± 5   | zircon  | ID-TIMS | intrusion | ARC                     |             | 50                                             |
| 127 | 45.1133 | 23.6000 |           | Saudi<br>Arabia | Arabian Shield       | Ar Rayn<br>province     | Al Amar volcanics                | hornblende<br>diorite                    | U-Pb   | 634± 6    | zircon  | ID-TIMS | intrusion | ARC                     |             | 50                                             |
| 128 | 45.1200 | 23.8917 |           | Saudi<br>Arabia | Arabian Shield       | Ar Rayn<br>province     | Jabal al Jabara                  | biotite<br>leucogranodior<br>ite (meta)  | U-Pb   | 631 ± 7   | zircon  | ID-TIMS | intrusion | ARC                     |             | 50                                             |
| 129 | 44.3550 | 23.8760 |           | Saudi<br>Arabia | Arabian Shield       | Ar Rayn<br>province     | Al Amar                          | hornblende<br>tonalite                   | U-Pb   | 623 ± 5   | zircon  | ID-TIMS | intrusion | ARC                     |             | 50                                             |
| 130 | 43.3127 | 22.1790 |           | Saudi<br>Arabia | Arabian Shield       | Zalm<br>quadrangle      | Southwest Zalm<br>quadrangle     | diorite gneiss                           | U-Pb   | 782 ± 4   | zircon  | ID-TIMS | intrusion | ARC                     |             | 51                                             |
| 131 | 42.5498 | 22.3960 |           | Saudi<br>Arabia | Arabian Shield       | Zalm<br>quadrangle      | Jidh suite                       | granodiorite<br>gneiss                   | U-Pb   | 696 ± 9   | zircon  | ID-TIMS | intrusion | ARC                     |             | 51                                             |
| 132 | 42.6273 | 22.0072 |           | Saudi<br>Arabia | Arabian Shield       | Zalm<br>quadrangle      | Subay suite                      | granodiorite<br>gneiss                   | U-Pb   | 683 ± 9   | zircon  | ID-TIMS | intrusion | SYN-OROGENIC            |             | 51                                             |
| 133 | 42.6110 | 22.7238 |           | Saudi<br>Arabia | Arabian Shield       | Zalm<br>quadrangle      | Jidh suite                       | diapiric<br>monzogranite                 | U-Pb   | 646 ± 17  | zircon  | ID-TIMS | intrusion | SYN-OROGENIC            |             | 51                                             |
| 134 | 43.0145 | 22.8240 |           | Saudi<br>Arabia | Arabian Shield       | Zalm<br>quadrangle      | Haml suite                       | granodiorite                             | U-Pb   | 632 ± 1.5 | zircon  | ID-TIMS | intrusion | FAULTING                |             | 51                                             |
| 135 | 42.6022 | 22.7302 |           | Saudi<br>Arabia | Arabian Shield       | Zalm<br>quadrangle      | Hufayrah complex                 | granite                                  | U-Pb   | 632 ± 3   | zircon  | ID-TIMS | intrusion | FAULTING                |             | 51                                             |
| 136 | 42.7998 | 22.7987 |           | Saudi<br>Arabia | Arabian Shield       | Zalm<br>quadrangle      | Bani Ghayy group                 | rhyolite                                 | U-Pb   | 620 ± 5   | zircon  | ID-TIMS | intrusion | FAULTING                |             | 51                                             |

| NO  | LON      | LAT     | ORG.<br>* | COUNTRY      | TECTONIC<br>DIVISION   | UNIT                   | UNIT NAME              | ROCK                          | METHOD | AGE (Ma)     | MINERAL | AGETYPE         | MEANING   | TECTONIC<br>ENVIRONMENT | CROSRE<br>F | ORGREF |
|-----|----------|---------|-----------|--------------|------------------------|------------------------|------------------------|-------------------------------|--------|--------------|---------|-----------------|-----------|-------------------------|-------------|--------|
| 137 | 42.7140  | 22.2522 |           | Saudi Arabia | Arabian Shield         | Zalm quadrangle        | Haml suite             | monzogranite                  | U-Pb   | 620 ± 18     | zircon  | ID-TIMS         | intrusion | FAULTING                |             | 51     |
| 138 | 31.7540  | 23.1610 | cop       | Egypt        | East Saharan Craton    | Nile Craton            | Gebel Um Shagir        | granite gneiss                | U-Pb   | 626 +4 /-3   | zircon  | ID-TIMS         | intrusion | ARC                     |             | 52     |
| 139 | 32.7680  | 23.8890 | cop       | Egypt        | East Saharan Craton    | Nile Craton            | SW Aswan               | granite                       | U-Pb   | 741 ± 3      | zircon  | ID-TIMS         | intrusion | ARC                     |             | 52     |
| 140 | 32.7110  | 24.1890 | cop       | Egypt        | East Saharan Craton    | Nile Craton            | Aswan                  | granite gneiss                | U-Pb   | 626 +4/-3    | zircon  | ID-TIMS         | intrusion | ARC                     |             | 52     |
| 141 | 32.9010  | 27.8590 | cop       | Egypt        | Northern Nubian Shield | the Ras Gharib segment | the Ras Gharib segment | diorite-tonalite              | Rb-Sr  | 881 ± 58     | WR      | isochrone       | intrusion | ARC                     |             | 53     |
| 142 | 32.8540  | 27.9220 | cop       | Egypt        | Northern Nubian Shield | the Ras Gharib segment | The extrusive rocks    | andesite and dacite porphyry  | Rb-Sr  | 620 ± 16     | WR      | isochrone       | formation | ARC                     |             | 53     |
| 143 | 32.9550  | 27.9450 | cop       | Egypt        | Northern Nubian Shield | the Ras Gharib segment | the Ras Gharib segment | granodiorite-leucogranite     | Rb-Sr  | 552 ± 7      | WR      | isochrone       | intrusion | ARC                     |             | 53     |
| 144 | 32.8910  | 27.9410 | cop       | Egypt        | Northern Nubian Shield | the Ras Gharib segment | the Ras Gharib segment | trondhjemite                  | Rb-Sr  | 516 ± 7      | WR      | isochrone       | intrusion | ARC                     |             | 53     |
| 145 | 32.9230  | 27.9240 | cop       | Egypt        | Northern Nubian Shield | the Ras Gharib segment | Dyke rocks             | dolerite, dacite              | Rb-Sr  | 493 ± 7      | WR      | isochrone       | intrusion | LATE-OROGENIC           |             | 53     |
| 146 | 32.9210  | 28.1210 | cop       | Egypt        | Northern Nubian Shield | the Ras Gharib segment | the Ras Gharib segment | peralkaline granite           | Rb-Sr  | 476 ± 2      | WR      | isochrone       | intrusion | INTRA-PLATE             |             | 53     |
| 147 | -9.0250  | 29.5920 | cop       | Morocco      | W Anti-Atlas           | Kerdous Massif         | Tarçouate Laccolith    | granodiorite                  | U-Pb   | 583.2 ± 11.3 | zircon  | upper intercept | intrusion | ARC                     |             | 54     |
| 148 | -9.0300  | 29.6000 | cop       | Morocco      | W Anti-Atlas           | Kerdous Massif         | Tarçouate Laccolith    | gabbro-diorite                | U-Pb   | 560.4 ± 1.7  | zircon  | upper intercept | intrusion | ARC                     |             | 54     |
| 149 | -10.6903 | 28.4438 | cop       | Morocco      | W Anti-Atlas           | Bas Drâa inlier        | Taurgha                | granite                       | U-Pb   | 575.3 ± 1.7  | zircon  | upper intercept | intrusion | POST-OROGENIC           |             | 54     |
| 150 | -9.0560  | 29.5580 | cop       | Morocco      | W Anti-Atlas           | Kerdous Massif         | Agouni Yessen pluton   | granitoid                     | Rb-Sr  | 549 ± 6      | WR      | isochrone       | intrusion | ARC                     | 55          | 56     |
| 151 | -8.9820  | 29.6970 | cop       | Morocco      | W Anti-Atlas           | Kerdous Massif         | Tafraoute plutons      | granitoid                     | Rb-Sr  | 549 ± 6      | WR      | isochrone       | intrusion | ARC                     | 55          | 56     |
| 152 | 44.1790  | 23.0900 | cop       | Saudi Arabia | Central Arabian Shield | Sequence A             | Hummah suite           | andesite, dacite and rhyolite | Rb-Sr  | 573 ± 23     | WR      | isochrone       | eruption  | ARC                     |             | 57     |
| 153 | 43.2990  | 22.5110 | cop       | Saudi Arabia | Central Arabian Shield | Sequence A             | Jahhad suite           | andesite, dacite and rhyolite | Rb-Sr  | 616 ± 13     | WR      | isochrone       | eruption  | ARC                     |             | 57     |
| 154 | 42.7730  | 21.1480 | cop       | Saudi Arabia | Central Arabian Shield | Sequence A             | Arfan suite            | andesite, dacite and rhyolite | Rb-Sr  | 608 ± 9      | WR      | isochrone       | eruption  | ARC                     |             | 57     |
| 155 | 42.8780  | 21.1830 | cop       | Saudi Arabia | Central Arabian Shield | Sequence A             | Juqujuq suite          | andesite, dacite and rhyolite | Rb-Sr  | 612 ± 22     | WR      | isochrone       | eruption  | ARC                     |             | 57     |
| 156 | 39.3203  | 21.4160 | cop       | Saudi Arabia | Central Arabian Shield | Sequence A             | Fatimah suite          | andesite, dacite and rhyolite | Rb-Sr  | 688 ± 30     | WR      | isochrone       | eruption  | ARC                     |             | 57     |

| NO  | LON     | LAT     | ORG.<br>*  | COUNTRY | TECTONIC<br>DIVISION         | UNIT                          | UNIT NAME                                  | ROCK                                     | METHOD | AGE (Ma)    | MINERAL | AGETYPE            | MEANING   | TECTONIC<br>ENVIRONMENT | CROSRE<br>F | ORGREF |
|-----|---------|---------|------------|---------|------------------------------|-------------------------------|--------------------------------------------|------------------------------------------|--------|-------------|---------|--------------------|-----------|-------------------------|-------------|--------|
| 157 | -6.7280 | 30.4930 | fm         | Morocco | Anti-Atlas<br>Mountains      | Bou Azzer<br>inlier           | Tazigzaout inlier                          | augen granite<br>gneiss                  | U-Pb   | 753 ± 1/ -2 | zircon  | upper<br>intercept | intrusion | ARC                     |             | 58     |
| 158 | -6.7300 | 30.4870 | fm         | Morocco | Anti-Atlas<br>Mountains      | Bou Azzer<br>inlier           | Tazigzaout inlier                          | fine-grained<br>granite                  | U-Pb   | 701 ± 2/ -1 | zircon  | upper<br>intercept | intrusion | ARC                     |             | 58     |
| 159 | -6.7320 | 30.4860 | fm         | Morocco | Anti-Atlas<br>Mountains      | Bou Azzer<br>inlier           | Tazigzaout inlier                          | metagabbro                               | U-Pb   | 752 ± 1/ -2 | zircon  | upper<br>intercept | intrusion | ARC                     |             | 58     |
| 160 | -6.7380 | 30.4830 | fm         | Morocco | Anti-Atlas<br>Mountains      | Bou Azzer<br>inlier           | Tazigzaout inlier                          | medium-<br>grained granite               | U-Pb   | 705 +2/-3   | zircon  | upper<br>intercept | intrusion | ARC                     |             | 58     |
| 161 | -6.4770 | 30.4595 |            | Morocco | Anti-Atlas<br>Mountains      | Bou Azzer<br>inlier           | Ait Abdulla                                | diorit                                   | U-Pb   | 653.8±1.6   | zircon  | upper<br>intercept | intrusion | SYN-OROGENIC            |             | 59     |
| 162 | -6.9874 | 30.5478 |            | Morocco | Anti-Atlas<br>Mountains      | Bou Azzer<br>inlier           | Bou Offroh                                 | granodiotrite                            | U-Pb   | 653.0±1.3   | zircon  | upper<br>intercept | intrusion | SYN-OROGENIC            |             | 59     |
| 163 | -6.5814 | 30.4862 |            | Morocco | Anti-Atlas<br>Mountains      | Bou Azzer<br>inlier           | Ousdrat                                    | diorite                                  | U-Pb   | 640.8± 1.4  | zircon  | upper<br>intercept | intrusion | SYN-OROGENIC            |             | 59     |
| 164 | -6.6583 | 30.4321 |            | Morocco | Anti-Atlas<br>Mountains      | Bou Azzer-El<br>Graara inlier | Bou Azzer ophiolite                        | ophiolitic<br>gabbro                     | U-Pb   | 697±8       | zircon  | SHRIMP             | formation | ARC                     |             | 60     |
| 165 | -6.6628 | 30.5155 |            | Morocco | Anti-Atlas<br>Mountains      | Bou Azzer-El<br>Graara inlier | Bou Zben pluton                            | granitoids                               | U-Pb   | 632±12      | zircon  | SHRIMP             | formation | ARC                     |             | 60     |
| 166 | -6.9779 | 30.5465 |            | Morocco | Anti-Atlas<br>Mountains      | Bou Azzer-El<br>Graara inlier | Bou Offroh pluton                          | quartz-diorite                           | U-Pb   | 659±8       | zircon  | SHRIMP             | formation | ARC                     |             | 60     |
| 167 | -6.7928 | 30.5139 |            | Morocco | Anti-Atlas<br>Mountains      | Bou Azzer-El<br>Graara inlier | Oumlill                                    | mylonitic<br>leucogranite                | U-Pb   | 741±9       | zircon  | SHRIMP             | formation | RIFTING                 |             | 60     |
| 168 | 34.9270 | 29.5260 | cop        | Israel  | Arabian-<br>Nubian Shield    | Elat granite                  | Wadi Shelomo<br>pluton                     | pegmatite vein                           | Rb-Sr  | 621 ± 12    | WR      | isochrone          | intrusion | LATE/POST-<br>OROGENIC  |             | 61     |
| 169 | 34.9380 | 29.5600 | cop        | Israel  | Arabian-<br>Nubian Shield    | Elat granite                  | Wadi Shahmon<br>pluton                     | monzogranite<br>(meta-)                  | Rb-Sr  | 640 ± 9     | WR-Ms   | isochrone          | intrusion | METAMORPHISM            |             | 61     |
| 170 | -8.7080 | 29.4830 | fm         | Morocco | Anti-Atlas                   | Tagragra<br>d'Akka Inlier     | Tagragra d'Akka<br>Inlier                  | dacite                                   | U-Pb   | 600 ± 5     | zircon  | SHRIMP             | intrusion | ARC                     |             | 62     |
| 171 | -6.4880 | 30.3720 |            | Morocco | Anti-Atlas                   | Bou Azzer<br>inlier           | Bleida                                     | granodiorite                             | U-Pb   | 579.4 ± 1.2 | zircon  | upper<br>intercept | intrusion | POST-<br>OROGENIC       |             | 63     |
| 172 | -6.4660 | 30.3620 |            | Morocco | Anti-Atlas                   | Bou Azzer<br>inlier           | Bleida                                     | granodiorite                             | U-Pb   | 578.5 ± 1.2 | zircon  | upper<br>intercept | intrusion | POST-<br>OROGENIC       |             | 63     |
| 173 | 0.9960  | 18.3960 | fm,<br>cop | Mali    | Trans-Saharan<br>mobile belt | Iforas batholith              | Yenchichi south                            | granite                                  | Rb-Sr  | 544 ±16     | WR      | isochron           | intrusion | POST-<br>OROGENIC       |             | 64     |
| 174 | 1.0410  | 18.8740 | fm,<br>cop | Mali    | Trans-Saharan<br>mobile belt | Iforas batholith              | Timedjelalen ring-<br>complex central part | rhyolitic lavas                          | Rb-Sr  | 561 ±7      | WR      | isochron           | intrusion | POST-<br>OROGENIC       |             | 64     |
| 175 | 1.3210  | 18.4600 | fm,<br>cop | Mali    | Trans-Saharan<br>mobile belt | Iforas batholith              | Kidal ring-complex<br>Lavass south         | peralkalinc<br>granite                   | Rb-Sr  | 543±9       | WR      | isochron           | intrusion | POST-<br>OROGENIC       |             | 64     |
| 176 | 1.3130  | 19.1890 | fm,<br>cop | Mali    | Trans-Saharan<br>mobile belt | Iforas batholith              | N-S dykes central<br>part                  | microsyenites<br>(alkaline<br>volcanics) | Rb-Sr  | 561 ±7      | WR      | isochron           | intrusion | POST-<br>OROGENIC       |             | 64     |
| 177 | 1.0620  | 19.0400 | fm,<br>cop | Mali    | Trans-Saharan<br>mobile belt | Iforas batholith              | Tahmert central<br>part                    | alkaline<br>granite                      | Rb-Sr  | 541±7       | WR      | isochron           | intrusion | POST-<br>OROGENIC       |             | 64     |

| NO  | LON    | LAT     | ORG.<br>*  | COUNTRY | TECTONIC<br>DIVISION         | UNIT                          | UNIT NAME                                     | ROCK                                | METHOD | AGE (Ma) | MINERAL | AGETYPE           | MEANING                    | TECTONIC<br>ENVIRONMENT | CROSRE<br>F | ORGREF |
|-----|--------|---------|------------|---------|------------------------------|-------------------------------|-----------------------------------------------|-------------------------------------|--------|----------|---------|-------------------|----------------------------|-------------------------|-------------|--------|
| 178 | 1.0200 | 18.3910 | fm,<br>cop | Mali    | Trans-Saharan<br>mobile belt | lforas batholith              | Yenchichi south                               | syenogranite                        | Rb-Sr  | 577 ±1   | WR      | isochron          | intrusion                  | POST-<br>OROGENIC       |             | 64     |
| 179 | 1.2520 | 19.0510 | fm,<br>cop | Mali    | Trans-Saharan<br>mobile belt | lforas batholith<br>E-W dykes | Telabit central part                          | quartz-two-<br>feldspar<br>porphyry | Rb-Sr  | 544 ±12  | WR      | isochron          | cooling age<br>(intrusion) | POST-<br>OROGENIC       |             | 64     |
| 180 | 1.2520 | 19.0510 | fm,<br>cop | Mali    | Trans-Saharan<br>mobile belt | lforas batholith<br>E-W dykes | Dohendal central<br>part                      | quartz-two-<br>feldspar<br>porphyry | Rb-Sr  | 556 ±10  | WR      | isochron          | cooling age<br>(intrusion) | POST-<br>OROGENIC       |             | 64     |
| 181 | 1.2520 | 19.0510 | fm,<br>cop | Mali    | Trans-Saharan<br>mobile belt | lforas batholith<br>E-W dykes | Yenchichi south                               | quartz-two-<br>feldspar<br>porphyry | Rb-Sr  | 565 ±14  | WR      | isochron          | cooling age<br>(intrusion) | POST-<br>OROGENIC       |             | 64     |
| 182 | 0.9180 | 19.1300 | fm,<br>cop | Mali    | Trans-Saharan<br>mobile belt | lforas batholith              | Aoukenek monzo-<br>granite (central part<br>) | monzo- granite                      | Rb-Sr  | 591 ±18  | WR      | isochron          | cooling age<br>(intrusion) | SYN-OROGENIC            |             | 64     |
| 183 | 1.0900 | 18.3420 | fm,<br>cop | Mali    | Trans-Saharan<br>mobile belt | lforas batholith              | Adma south                                    | granodiorite                        | Rb-Sr  | 595±24   | WR      | isochron          | cooling age<br>(intrusion) | SYN-OROGENIC            |             | 64     |
| 184 | 1.3210 | 20.2690 | fm,<br>cop | Mali    | Trans-Saharan<br>mobile belt | lforas batholith              | Tin Seyed north                               | q-monzodiorite                      | Rb-Sr  | 581±15   | WR      | isochron          | cooling age<br>(intrusion) | SYN-OROGENIC            |             | 64     |
| 185 | 0.8640 | 18.6760 | fm,<br>cop | Mali    | Trans-Saharan<br>mobile belt | lforas batholith              | Erecher tonalite<br>south                     | tonalite                            | Rb-Sr  | 602 ±13  | WR      | isochron          | cooling age<br>(intrusion) | SYN-OROGENIC            |             | 64     |
| 186 | 1.7010 | 19.1000 | fm,<br>cop | Mali    | Trans-Saharan<br>mobile belt | lforas batholith              | Ibdeken<br>granodiorite south                 | granodiorite                        | Rb-Sr  | 613 ±29  | WR      | isochron          | intrusion                  | SYN-OROGENIC            |             | 64     |
| 187 | 1.0960 | 18.3480 | fm,<br>cop | Mali    | Trans-Saharan<br>mobile belt | lforas batholith              | Adma granodiorite<br>south                    | granodiorite                        | Rb-Sr  | 620 ±6   | WR      | isochron          | intrusion                  | ARC                     |             | 64     |
| 188 | 1.2330 | 18.8460 | fm,<br>cop | Mali    | Trans-Saharan<br>mobile belt | lforas batholith              | Tafeliant dykes<br>south                      | volcanics?                          | Rb-Sr  | 634 ±15  | WR      | isochron          | intrusion                  | ARC                     |             | 64     |
| 189 | 1.3630 | 18.0010 | fm,<br>cop | Mali    | Trans-Saharan<br>mobile belt | lforas batholith              | Teggart south                                 | q-diorite                           | Rb-Sr  | 696 ±5   | WR      | isochron          | intrusion                  | ARC                     |             | 64     |
| 190 | 8.6460 | 21.9490 | fm,<br>cop | Algeria | Saharan<br>metacraton        | Tuareg shield                 | Hanane pluton                                 | granodiorite                        | U-Pb   | 582 ± 3  | zircon  | concordant<br>age | intrusion                  | FAULTING                |             | 65     |
| 191 | 8.3990 | 21.5630 | fm,<br>cop | Algeria | Saharan<br>metacraton        | Tuareg shield                 | Yvonne granite                                | granite                             | U-Pb   | 595 ± 3  | zircon  | concordant<br>age | intrusion                  | FAULTING                |             | 65     |
| 192 | 8.6110 | 22.0400 | fm,<br>cop | Algeria | Saharan<br>metacraton        | Tuareg shield                 | Ohergehem pluton                              | biotite-bearing<br>granodiorite     | U-Pb   | 594±4    | zircon  | concordant<br>age | intrusion                  | FAULTING                |             | 66     |
| 193 | 8.5890 | 22.3940 | fm,<br>cop | Algeria | Saharan<br>metacraton        | Tuareg shield                 | Arigher batholith                             | granodiorite                        | U-Pb   | 554±5    | zircon  | concordant<br>age | intrusion                  | FAULTING                |             | 66     |
| 194 | 8.4480 | 22.7200 | fm,<br>cop | Algeria | Saharan<br>metacraton        | Tuareg shield                 | Touffok pluton                                | granitoid                           | U-Pb   | 793±4    | zircon  | concordant<br>age | intrusion                  | FAULTING                |             | 66     |
| 195 | 8.6167 | 22.0667 | fm         | Algeria | Saharan<br>metacraton        | Eastern<br>Hoggar             | Tiririne Formation                            | monzonite<br>dyke                   | U-Pb   | 660 ±5   | zircon  | concordant<br>age | intrusion                  | PRE-OROGENIC            |             | 67     |
| 196 | 8.4030 | 22.7770 | fm,<br>cop | Algeria | Saharan<br>metacraton        | Tuareg shield                 | Adaf pluton                                   | foliated<br>adamellite              | U-Pb   | 604±13   | zircon  | concordant<br>age | intrusion                  | SYN-OROGENIC            |             | 67     |

| NO  | LON     | LAT     | ORG.<br>* | COUNTRY | TECTONIC<br>DIVISION      | UNIT                      | UNIT NAME                | ROCK                       | METHOD | AGE (Ma) | MINERAL   | AGETYPE            | MEANING   | TECTONIC<br>ENVIRONMENT | CROSRE<br>F | ORGREF |
|-----|---------|---------|-----------|---------|---------------------------|---------------------------|--------------------------|----------------------------|--------|----------|-----------|--------------------|-----------|-------------------------|-------------|--------|
| 197 | 8.4167  | 23.7833 | fm        | Algeria | Saharan<br>metacraton     | Tuareg shield             | Adaf pluton              | porphyritic<br>adamellite  | U-Pb   | 585±14   | zircon    | concordant<br>age  | intrusion | LATE-OROGENIC           |             | 67     |
| 198 | 34.4830 | 25.0160 | cop       | Egypt   | Nubian Shield             | Central<br>eastern desert | Sheikh Salem<br>pluton   | quartz<br>monzonite        | Rb-Sr  | 597 ± 16 | WR        | isochron           | intrusion | POST-<br>OROGENIC       | 68          | 69     |
| 199 | 34.4300 | 25.5040 | cop       | Egypt   | Nubian Shield             | Central<br>eastern desert | Kadabora pluton          | quartz<br>monzonite        | Rb-Sr  | 607 ± 8  | WR        | isochron           | intrusion | POST-<br>OROGENIC       | 68          | 69     |
| 200 | 33.8700 | 26.7300 | cop       | Egypt   | Nubian Shield             | Central<br>eastern desert | Dokhan Formation         | andesite –<br>rhyolite     | Rb-Sr  | 602 ± 12 | WR        | isochron           | eruption  | ARC                     | 68          | 30     |
| 201 | 33.0750 | 27.8400 | cop       | Egypt   | Nubian Shield             | Central<br>eastern desert | Dokhan Formation         | lithic-ignimbrite          | U-Pb   | 615±4    | zircon    | SHRIMP             | eruption  | ARC                     | 70          | 71     |
| 202 | 33.0580 | 27.8580 | cop       | Egypt   | Nubian Shield             | Central<br>eastern desert | Dokhan Formation         | crystal-poor<br>ignimbrite | U-Pb   | 616±5.4  | zircon    | SHRIMP             | eruption  | ARC                     | 70          | 71     |
| 203 | 34.8300 | 29.6520 | cop       | Israel  | Arabian-<br>Nubian Massif | Elat Volcanics            | Hare Neshef              | alkaline<br>rhyolite       | Rb-Sr  | 529 ± 12 | WR        | isochron           | eruption  | RIFTING                 | 72          | 73,74  |
| 204 | 35.3740 | 30.2840 | cop       | Jordan  | Arabian-<br>Nubian Massif | Elat Volcanics            | NE Wadi Abu<br>Khusheiba | alkaline<br>rhyolite       | Rb-Sr  | 527 ± 3  | WR        | isochron           | eruption  | RIFTING                 | 72          | 75     |
| 205 | 34.8910 | 29.4970 | cop       | Israel  | Arabian-<br>Nubian Massif | Elat Volcanics            | Wadi Tweibe              | alkaline<br>rhyolite       | Rb-Sr  | 483±13   | WR        | isochron           | eruption  | RIFTING                 | 72          | 73, 74 |
| 206 | 35.2580 | 30.0740 | cop       | Israel  | Arabian-<br>Nubian Massif | Elat Volcanics            | Gharandal                | alkaline<br>rhyolite       | Rb-Sr  | 535± 15  | WR        | isochron           | eruption  | RIFTING                 | 72          | 75     |
| 207 | 35.3040 | 30.2410 | cop       | Israel  | Arabian-<br>Nubian Massif | Elat Volcanics            | S Wadi Abu<br>Khusheiba  | rhyodacite                 | Rb-Sr  | 633 ± 14 | WR        | isochron           | eruption  | RIFTING                 | 72          | 75     |
| 208 | 34.9120 | 29.5230 | cop       | Israel  | Arabian-<br>Nubian Massif | Elat Volcanics            | Nahal Shelomo            | rhyodacite                 | Rb-Sr  | 548 ± 4  | WR        | isochron           | eruption  | RIFTING                 | 72          | 73, 74 |
| 209 | 35.2500 | 22.8500 |           | Egypt   | Arabian-<br>Nubian Massif | Easter Desert             | Wadi Kreiga              | tonalite                   | Rb-Sr  | 709      | WR        | model ages         | intrusion | ARC                     |             | 76     |
| 210 | 33.9000 | 22.5170 |           | Egypt   | Arabian-<br>Nubian Massif | Easter Desert             | Abu Swayel               | rhyodacite                 | Rb-Sr  | 768 ± 31 | WR        | isochron           | eruption  | ARC                     |             | 76     |
| 211 | 35.2670 | 23.2670 |           | Egypt   | Arabian-<br>Nubian Massif | Easter Desert             | Gebel Farid              | granite                    | Rb-Sr  | 587 ± 11 | felds.-WR | isochron           | intrusion | RIFTING                 |             | 76     |
| 212 | 32.8900 | 24.0500 |           | Egypt   | Arabian-<br>Nubian Massif | Easter Desert             | Aswan                    | k-feldspar<br>granite      | U-Pb   | 594 ±4   | zircon    | upper<br>intercept | intrusion | RIFTING                 |             | 76     |
| 213 | 34.4600 | 24.7000 | cop       | Egypt   | Arabian-<br>Nubian Massif | Easter Desert             | Hafafit                  | tonalite                   | U-Pb   | 682      | zircon    | upper<br>intercept | intrusion | SYN-OROGENIC            |             | 76     |
| 214 | 33.7500 | 25.2500 |           | Egypt   | Arabian-<br>Nubian Massif | Easter Desert             | Wadi El Mia              | granodiorite               | Rb-Sr  | 674 ± 13 | WR        | isochron           | intrusion | SYN-OROGENIC            |             | 76     |
| 215 | 33.6500 | 25.7500 |           | Egypt   | Arabian-<br>Nubian Massif | Easter Desert             | Wadi El Mahdaf           | metavolcanic               | Rb-Sr  | 622 ± 6  | WR        | isochron           | eruption  | ARC                     |             | 76     |
| 216 | 33.7500 | 26.0000 |           | Egypt   | Arabian-<br>Nubian Massif | Easter Desert             | Abu Ziran                | granodiorite               | U-Pb   | 614 ± 8  | zircon    | upper<br>intercept | intrusion | ARC                     |             | 76     |
| 217 | 33.4833 | 26.8167 |           | Egypt   | Arabian-<br>Nubian Massif | Easter Desert             | Mons Claudianus          | granodiorite               | U-Pb   | 666      | zircon    | single grain       | intrusion | ARC                     |             | 76     |

| NO  | LON     | LAT     | ORG.<br>* | COUNTRY | TECTONIC<br>DIVISION      | UNIT                           | UNIT NAME                     | ROCK                                | METHOD | AGE (Ma)  | MINERAL   | AGETYPE            | MEANING   | TECTONIC<br>ENVIRONMENT | CROSRE<br>F | ORGREF |
|-----|---------|---------|-----------|---------|---------------------------|--------------------------------|-------------------------------|-------------------------------------|--------|-----------|-----------|--------------------|-----------|-------------------------|-------------|--------|
| 218 | 33.7500 | 26.5500 |           | Egypt   | Arabian-<br>Nubian Massif | Easter Desert                  | Gegel Nuqrah                  | andesite                            | Rb-Sr  | 581 ±7    | WR        | isochron           | eruption  | RIFTING                 |             | 76     |
| 219 | 33.3667 | 24.1167 |           | Egypt   | Arabian-<br>Nubian Massif | Easter Desert                  | Gegel Qattar                  | pink granite                        | U-Pb   | 579       | zircon    | single grain       | intrusion | RIFTING                 |             | 76     |
| 220 | 32.3667 | 27.1833 |           | Egypt   | Arabian-<br>Nubian Massif | Easter Desert                  | Salah El Belih                | granodiorite                        | U-Pb   | 583       | zircon    | single grain       | intrusion | RIFTING                 |             | 76     |
| 221 | 33.2833 | 27.2500 |           | Egypt   | Arabian-<br>Nubian Massif | Easter Desert                  | Gegel Dokhan                  | andesite and<br>dacite<br>volcanics | Rb-Sr  | 592 ± 13  | WR        | isochron           | eruption  | RIFTING                 |             | 76     |
| 222 | 33.3333 | 27.2167 | cop       | Egypt   | Arabian-<br>Nubian Massif | Easter Desert                  | Qattar Dokhan area            | rhyolite and<br>andesite dykes      | Rb-Sr  | 589 ±4    | felds.-WR | isochron           | eruption  | RIFTING                 |             | 76     |
| 223 | 32.9167 | 27.6000 |           | Egypt   | Arabian-<br>Nubian Massif | Easter Desert                  | Wadi Dib                      | granodiorite                        | U-Pb   | 620       | zircon    | single grain       | intrusion | ARC                     |             | 76     |
| 224 | 33.0333 | 27.8000 |           | Egypt   | Arabian-<br>Nubian Massif | Easter Desert                  | Wadi Dib                      | felsic dyke                         | Rb-Sr  | 550       | WR        | model ages         | intrusion | RIFTING                 |             | 76     |
| 225 | 33.0500 | 27.9167 |           | Egypt   | Arabian-<br>Nubian Massif | Easter Desert                  | Gebel Dara                    | pink granite                        | U-Pb   | 596       | zircon    | single grain       | intrusion | RIFTING                 |             | 76     |
| 226 | 33.0500 | 27.9167 |           | Egypt   | Arabian-<br>Nubian Massif | Easter Desert                  | Gebel Dara                    | rhyolite dyke                       | Rb-Sr  | ~543      | WR        | model ages         | intrusion | RIFTING                 |             | 76     |
| 227 | 33.4833 | 27.9667 |           | Egypt   | Arabian-<br>Nubian Massif | Easter Desert                  | Gebel Zeit                    | riebeckite<br>granite               | Rb-Sr  | ~592      | WR        | model ages         | intrusion | RIFTING                 |             | 76     |
| 228 | 32.1000 | 28.1333 |           | Egypt   | Arabian-<br>Nubian Massif | Easter Desert                  | Gebel Gharib                  | riebeckite<br>alkali granite        | Rb-Sr  | ~544      | WR        | model ages         | intrusion | RIFTING                 |             | 76     |
| 229 | 32.5667 | 28.4167 | cop       | Egypt   | Arabian-<br>Nubian Massif | Easter Desert                  | Wadi Hawashiya<br>and Gazalla | pink granite                        | Rb-Sr  | 577 ±6    | WR        | isochron           | intrusion | RIFTING                 |             | 76     |
| 230 | 32.5833 | 28.5333 |           | Egypt   | Arabian-<br>Nubian Massif | Easter Desert                  | Um Tennesib                   | granite dyke                        | Rb-Sr  | 575 ±11   | WR        | isochron           | intrusion | RIFTING                 |             | 76     |
| 231 | 33.6730 | 28.7090 | fm        | Egypt   | Arabian-<br>Nubian Massif | Sinai                          | Feiran basement               | basalt-rhyolite<br>dyke             | Rb-Sr  | 591 ± 9   | WR        | isochron           | intrusion | RIFTING                 |             | 77     |
| 232 | 33.7180 | 28.6950 | fm        | Egypt   | Arabian-<br>Nubian Massif | Sinai                          | Feiran basement               | hb-Bt<br>orthogneiss                | U-Pb   | 782 ± 7   | zircon    | upper<br>intercept | intrusion |                         |             | 77     |
| 233 | 35.5667 | 29.9667 |           | Israel  | Arabian-<br>Nubian shield | Elat<br>Metamorphic<br>Complex | Umm-Zeriq gneiss              | orthogneiss                         | U-Pb   | 735 ± 29  | zircon    | SHRIMP II          | intrusion | ARC                     |             | 78     |
| 234 | 34.8833 | 30.3167 |           | Israel  | Arabian-<br>Nubian shield | Elat<br>Metamorphic<br>Complex | Morakh gneiss                 | orthogneiss                         | U-Pb   | 611 ± 15  | zircon    | SHRIMP II          | intrusion | POST-<br>OROGENIC       |             | 78     |
| 235 | 35.0500 | 30.1167 |           | Israel  | Arabian-<br>Nubian shield | Elat<br>Metamorphic<br>Complex | Umm-Maghra<br>gneiss          | orthogneiss                         | U-Pb   | 630 ± 13  | zircon    | SHRIMP II          | intrusion | POST-<br>OROGENIC       |             | 78     |
| 236 | 34.9833 | 29.5667 |           | Israel  | Arabian-<br>Nubian shield | Elat<br>Metamorphic<br>Complex | Shahmon gneiss                | orthogneiss                         | U-Pb   | 628 ± 6.3 | zircon    | SHRIMP II          | intrusion | POST-<br>OROGENIC       |             | 78     |

| NO  | LON     | LAT     | ORG.<br>* | COUNTRY | TECTONIC<br>DIVISION      | UNIT                           | UNIT NAME                    | ROCK                         | METHOD | AGE (Ma)    | MINERAL    | AGETYPE     | MEANING                                | TECTONIC<br>ENVIRONMENT | CROSRE<br>F | ORGREF |
|-----|---------|---------|-----------|---------|---------------------------|--------------------------------|------------------------------|------------------------------|--------|-------------|------------|-------------|----------------------------------------|-------------------------|-------------|--------|
| 237 | 34.9000 | 29.7333 |           | Israel  | Arabian-<br>Nubian shield | Elat<br>Metamorphic<br>Complex | quartz syenite<br>granophyre | quartz syenite<br>granophyre | U-Pb   | 587.7 ± 5.6 | zircon     | SHRIMP II   | intrusion                              | INTRA-PLATE             |             | 78     |
| 238 | 34.5690 | 24.6040 | fm        | Egypt   | East Saharan<br>Croton    | Eastern Desert                 | Wadi Hafafit area            | trondhjemites                | Pb-Pb  | 700 ± 12    | zircon     | evaporation | emplacement                            | ARC                     |             | 79     |
| 239 | 34.5740 | 24.6240 | fm        | Egypt   | East Saharan<br>Croton    | Eastern Desert                 | Wadi Hafafit area            | trondhjemites                | Pb-Pb  | 698 ± 14    | zircon     | evaporation | emplacement                            | ARC                     |             | 79     |
| 240 | 34.5880 | 24.6380 | fm        | Egypt   | East Saharan<br>Croton    | Eastern Desert                 | Wadi Hafafit area            | granite                      | Pb-Pb  | 677 ± 9     | zircon     | evaporation | emplacement                            | ARC                     |             | 79     |
| 241 | 35.0120 | 23.3940 | nc        | Egypt   | East Saharan<br>Croton    | Eastern Desert                 | Wadi Bitan gneiss            | granitic gneiss              | Pb-Pb  | 704 ± 8     | zircon     | evaporation | emplacement                            | ARC                     |             | 79     |
| 242 | 33.8000 | 28.7000 | cop       | Egypt   | East Saharan<br>Croton    | Eastern Desert                 | Wadi Feiran gneiss           | granitoid<br>orthogneiss     | Pb-Pb  | 796 ± 6     | zircon     | evaporation | emplacement                            | ARC                     |             | 79     |
| 243 | 33.6056 | 26.0026 |           | Egypt   | East Saharan<br>Croton    | Meatiq Gneiss<br>Dome          | Meatiq Gneiss<br>Dome        | felsite                      | U-Pb   | 747.8 ± 3   | zircon     | ID-TIMS     | crystallization                        | ARC                     |             | 80     |
| 244 | 33.5706 | 25.9994 |           | Egypt   | East Saharan<br>Croton    | Meatiq Gneiss<br>Dome          | Fawakhir                     | monzodiorite                 | U-Pb   | 597.8 ± 2.9 | zircon     | ID-TIMS     | crystallization                        | POST-<br>OROGENIC       |             | 80     |
| 245 | 33.8442 | 26.1442 |           | Egypt   | East Saharan<br>Croton    | Meatiq Gneiss<br>Dome          | Um Ba'anib                   | orthogneiss                  | U-Pb   | 630.8 ± 2.0 | zircon     | ID-TIMS     | crystallization                        |                         |             | 80     |
| 246 | 33.8542 | 26.1539 |           | Egypt   | East Saharan<br>Croton    | Meatiq Gneiss<br>Dome          | Abu Fannani Thrust<br>Sheet  | dioritic lens                | Pb-Pb  | 609.0 ± 1.0 | zircon     | ID-TIMS     | crystallization                        | SYN-OROGENIC            |             | 80     |
| 247 | 33.8498 | 26.1614 |           | Egypt   | East Saharan<br>Croton    | Meatiq Gneiss<br>Dome          | Abu Fannani Thrust<br>Sheet  | dioritic lens 2              | U-Pb   | 605.8 ± 0.9 | zircon     | ID-TIMS     | crystallization                        | SYN-OROGENIC            |             | 80     |
| 248 | 33.8326 | 26.0000 |           | Egypt   | East Saharan<br>Croton    | Meatiq Gneiss<br>Dome          | Abu Ziran                    | diorite                      | U-Pb   | 606.4 ± 1.0 | zircon     | ID-TIMS     | crystallization                        | SYN-OROGENIC            |             | 80     |
| 249 | 33.7812 | 26.0691 |           | Egypt   | East Saharan<br>Croton    | Meatiq Gneiss<br>Dome          | Arieki pluton                | granite                      | U-Pb   | 590.5 ± 3.1 | zircon     | ID-TIMS     | crystallization                        | POST-<br>OROGENIC       |             | 80     |
| 250 | 33.5121 | 26.0213 |           | Egypt   | East Saharan<br>Croton    | Meatiq Gneiss<br>Dome          | Um Had                       | granite                      | U-Pb   | 596.3 ± 1.7 | zircon     | ID-TIMS     | crystallization                        | POST-<br>OROGENIC       |             | 80     |
| 251 | 33.7180 | 26.0350 | fm        | Egypt   | East Saharan<br>Croton    | Meatiq Core<br>Complex         | Meatiq Core<br>Complex       | sheared<br>metapelite        | Ar-Ar  | 588 ± 0.5   | muscovite  | ?           | Sinistral<br>strike-slip<br>exhumation | FAULTING                | 81          | 82     |
| 252 | 33.7890 | 26.0000 | fm        | Egypt   | East Saharan<br>Croton    | Meatiq Core<br>Complex         | Meatiq Core<br>Complex       | sheared<br>granite           | Ar-Ar  | 595 ± 0.5   | muscovite  | ?           | Sinistral<br>strike-slip<br>exhumation | FAULTING                | 81          | 82     |
| 253 | 33.7790 | 26.1040 | fm        | Egypt   | East Saharan<br>Croton    | Meatiq Core<br>Complex         | Arieki pluton                | granite                      | Rb-Sr  | 579.5 ± 6   | WR         | isochrone   | emplacement                            | POST-<br>OROGENIC       | 81          | 83     |
| 254 | 33.7970 | 26.1420 | fm        | Egypt   | East Saharan<br>Croton    | Meatiq Core<br>Complex         | Um Baanib gneiss             | amphibolite                  | Ar-Ar  | 580.3 ± 0.3 | hornblende | plateau     | Sinistral<br>strike-slip<br>exhumation | FAULTING                |             | 81     |
| 255 | 33.8130 | 26.1350 | fm        | Egypt   | East Saharan<br>Croton    | Meatiq Core<br>Complex         | Um Baanib gneiss             | amphibolite                  | Ar-Ar  | 587.3 ± 0.2 | hornblende | plateau     | Sinistral<br>strike-slip<br>exhumation | FAULTING                |             | 81     |
| 256 | 33.8400 | 26.0360 | fm        | Egypt   | East Saharan<br>Croton    | Meatiq Core<br>Complex         | Um Baanib gneiss             | amphibolite                  | Ar-Ar  | 579.1 ± 0.2 | hornblende | plateau     | Sinistral<br>strike-slip<br>exhumation | FAULTING                |             | 81     |

| NO  | LON     | LAT     | ORG.<br>* | COUNTRY | TECTONIC<br>DIVISION   | UNIT                      | UNIT NAME                             | ROCK                              | METHOD | AGE (Ma)   | MINERAL    | AGETYPE     | MEANING                                | TECTONIC<br>ENVIRONMENT | CROSRE<br>F | ORGREF |
|-----|---------|---------|-----------|---------|------------------------|---------------------------|---------------------------------------|-----------------------------------|--------|------------|------------|-------------|----------------------------------------|-------------------------|-------------|--------|
| 257 | 33.8410 | 26.1360 | fm        | Egypt   | East Saharan<br>Croton | Meatiq Core<br>Complex    | Um Baanib gneiss                      | amphibolite                       | Ar-Ar  | 583.9 ±0.2 | hornblende | plateau     | Sinistral<br>strike-slip<br>exhumation | FAULTING                |             | 81     |
| 258 | 33.7900 | 26.0150 | fm        | Egypt   | East Saharan<br>Croton | Meatiq Core<br>Complex    | Meatiq                                | garnet kyanite<br>schists         | Ar-Ar  | 582.3 ±0.2 | muscovite  | plateau     | Sinistral<br>strike-slip<br>exhumation | FAULTING                |             | 81     |
| 259 | 34.2520 | 25.6760 | fm        | Egypt   | East Saharan<br>Croton | Sibai Core<br>Complex     | Sibai                                 | amphibolite                       | Ar-Ar  | 606.7 ±0.2 | hornblende | plateau     | cooling age<br>(exhumation)            | RIFTING                 |             | 81     |
| 260 | 34.3140 | 25.6190 | fm        | Egypt   | East Saharan<br>Croton | Sibai Core<br>Complex     | Abu Markhat gneiss                    | amphibolite                       | Ar-Ar  | 623.6 ±0.2 | hornblende | plateau     | cooling age<br>(exhumation)            | RIFTING                 |             | 81     |
| 261 | 34.5110 | 24.8120 | fm        | Egypt   | East Saharan<br>Croton | Sibai Core<br>Complex     | Hafafit Core<br>Complex               | orthogneisses                     | Ar-Ar  | 586.1 ±0.3 | hornblende | plateau     | cooling age<br>(exhumation)            | RIFTING                 |             | 81     |
| 262 | 34.5080 | 24.7780 | fm        | Egypt   | East Saharan<br>Croton | Sibai Core<br>Complex     | Hafafit Core<br>Complex               | orthogneisses                     | Ar-Ar  | 584.2 ±0.2 | hornblende | plateau     | cooling age<br>(exhumation)            | RIFTING                 |             | 81     |
| 263 | 34.9957 | 24.7482 |           | Egypt   | East Saharan<br>Croton | Eastern Desert            | Wadi Ghadir<br>ophiolite              | plagiogranite                     | Pb-Pb  | 746 ±19    | zircon     | evaporation | formation                              | ARC                     | 84          | 85     |
| 264 | 33.7186 | 22.6729 |           | Egypt   | East Saharan<br>Croton | Eastern Desert            | Abu Swayel<br>ophiolite               | gabbro                            | Pb-Pb  | 729 ± 17   | zircon     | evaporation | formation                              | ARC                     | 84          | 85     |
| 265 | 33.7116 | 22.6669 |           | Egypt   | East Saharan<br>Croton | Eastern Desert            | Abu Swayel<br>ophiolite               | diorite                           | Pb-Pb  | 736 ± 1 1  | zircon     | evaporation | formation                              | ARC                     | 84          | 85     |
| 266 | 35.0044 | 22.5448 |           | Sudan   | East Saharan<br>Croton | Eastern Desert            | Jabal Gerf ophiolite                  | layered gabbro                    | Pb-Pb  | 741 ± 21   | zircon     | evaporation | formation                              | ARC                     | 84          | 85     |
| 267 | 35.9257 | 21.5716 |           | Sudan   | East Saharan<br>Croton | Eastern Desert            | Onib ophiolite                        | plagiogranite                     | Pb-Pb  | 808 ±14    | zircon     | evaporation | formation                              | ARC                     | 84          | 85     |
| 268 | 35.9248 | 21.5633 |           | Sudan   | East Saharan<br>Croton | Eastern Desert            | Onib                                  | leucogranites                     | Pb-Pb  | 713 ± 12   | zircon     | evaporation | formation                              | ARC                     | 84          | 85     |
| 269 | 35.9331 | 21.5598 |           | Sudan   | East Saharan<br>Croton | Eastern Desert            | Onib                                  | leucogranites                     | Pb-Pb  | 714 ± 5    | zircon     | evaporation | formation                              | ARC                     | 84          | 85     |
| 270 | 35.9495 | 21.5985 |           | Sudan   | East Saharan<br>Croton | Eastern Desert            | Wadi Onib                             | leucogranites                     | Pb-Pb  | 646 ±10    | zircon     | evaporation | formation                              | INTRA-PLATE             | 84          | 85     |
| 271 | 33.1700 | 22.8300 |           | Egypt   | East Saharan<br>Croton | Eastern Desert            | Allaqi                                | felsic dyke                       | Pb-Pb  | 770 ± 9    | zircon     | evaporation | formation                              | ARC                     | 84          | 85     |
| 272 | 33.8040 | 26.1440 | cop       | Egypt   | East Saharan<br>Croton | Eastern Desert            | Meatiq<br>metamorphic core<br>complex | ortho-<br>amphibolite<br>xenolith | Pb-Pb  | 819 ±38    | zircon     | evaporation | formation                              | RIFTING                 |             | 86     |
| 273 | 33.7720 | 26.0800 | cop       | Egypt   | East Saharan<br>Croton | Eastern Desert            | Meatiq<br>metamorphic core<br>complex | ophiolitic cover                  | Pb-Pb  | 788 ±13    | zircon     | evaporation | formation                              | RIFTING                 |             | 86     |
| 274 | 33.8520 | 26.0870 | cop       | Egypt   | East Saharan<br>Croton | Eastern Desert            | Um Baanib                             | granitic gneiss                   | Pb-Pb  | 779 ±4     | zircon     | evaporation | formation                              | RIFTING                 |             | 86     |
| 275 | 33.8360 | 26.0000 | cop       | Egypt   | East Saharan<br>Croton | Eastern Desert            | Meatiq<br>metamorphic core<br>complex | granitic stock                    | Pb-Pb  | 644 ±20    | zircon     | evaporation | formation                              | SYN-OROGENIC            |             | 86     |
| 276 | 34.2310 | 25.2310 | cop       | Egypt   | East Saharan<br>Croton | central<br>Eastern Desert | Abu-Diab                              | granite                           | Rb-Sr  | 585±24     | WR         | isochron    | formation                              | RIFTING                 |             | 87     |



| NO  | LON     | LAT     | ORG.<br>* | COUNTRY | TECTONIC<br>DIVISION    | UNIT                      | UNIT NAME                   | ROCK                                    | METHOD | AGE (Ma) | MINERAL   | AGETYPE       | MEANING                             | TECTONIC<br>ENVIRONMENT | CROSRE<br>F | ORGREF |
|-----|---------|---------|-----------|---------|-------------------------|---------------------------|-----------------------------|-----------------------------------------|--------|----------|-----------|---------------|-------------------------------------|-------------------------|-------------|--------|
| 277 | 34.5700 | 24.7150 | fm        | Egypt   | East Saharan<br>Croton  | central<br>Eastern Desert | Wadi Hafafit<br>Culmination | biotite-gneiss                          | Rb-Sr  | 573±6    | WR-Bt-Plg | isochron      | cooling                             | RIFTING                 |             | 88     |
| 278 | 34.5750 | 24.6720 | fm        | Egypt   | East Saharan<br>Croton  | central<br>Eastern Desert | Wadi Hafafit<br>Culmination | hornblende-<br>gneiss                   | Sm-Nd  | 585±8    | WR-Gr-Plg | isochron      | cooling from<br>the thermal<br>peak | RIFTING                 |             | 88     |
| 279 | 34.5720 | 24.7410 | fm        | Egypt   | East Saharan<br>Croton  | central<br>Eastern Desert | Wadi Hafafit<br>Culmination | amphibolite                             | Sm-Nd  | 593±4    | WR-Gr-Plg | isochron      | cooling from<br>the thermal<br>peak | RIFTING                 |             | 88     |
| 280 | 34.0394 | 25.9419 |           | Egypt   | East Saharan<br>Croton  | central<br>Eastern Desert | Wadi Kareim                 | basalt                                  | U-Pb   | 730±22   | zircon    | SHRIMP-<br>RG | formation                           | ARC                     |             | 89     |
| 281 | 34.0358 | 25.9442 |           | Egypt   | East Saharan<br>Croton  | central<br>Eastern Desert | Wadi Kareim                 | Diabase                                 | U-Pb   | 743±45   | zircon    | SHRIMP-<br>RG | formation                           | ARC                     |             | 89     |
| 282 | 34.0375 | 25.9478 |           | Egypt   | East Saharan<br>Croton  | central<br>Eastern Desert | Wadi Kareim                 | Felsic Tuff                             | U-Pb   | 769±29   | zircon    | SHRIMP-<br>RG | formation                           | ARC                     |             | 89     |
| 283 | 34.1517 | 25.8317 |           | Egypt   | East Saharan<br>Croton  | central<br>Eastern Desert | Wadi El Dabbah              | andesite                                | U-Pb   | 734 ± 7  | zircon    | SHRIMP-<br>RG | formation                           | ARC                     |             | 89     |
| 284 | 33.9510 | 22.2260 |           | Egypt   | south Eastern<br>Desert | Allaqi-Heiani<br>Suture   | Wadi Abu-Fas                | layered gabbro                          | U-Pb   | 730±6    | zircon    | SHRIMP II     | crystallization<br>age              | OCEANIC                 |             | 90     |
| 285 | 34.0530 | 22.1860 |           | Egypt   | south Eastern<br>Desert | Allaqi-Heiani<br>Suture   | Jabal Moqsim                | gabbro                                  | U-Pb   | 697±5    | zircon    | SHRIMP II     | crystallization<br>age              | OCEANIC                 |             | 90     |
| 286 | 33.7660 | 22.6310 |           | Egypt   | south Eastern<br>Desert | Allaqi-Heiani<br>Suture   | Wadi Shilman                | metavolcanic                            | U-Pb   | 733±7    | zircon    | SHRIMP II     | crystallization<br>age              | ARC                     |             | 90     |
| 287 | 33.5970 | 22.6830 |           | Egypt   | south Eastern<br>Desert | Allaqi-Heiani<br>Suture   | Wadi Shilman                | granodiorite                            | U-Pb   | 629±5    | zircon    | SHRIMP II     | crystallization<br>age              | SYN-OROGENIC            |             | 90     |
| 288 | 33.2170 | 22.8630 |           | Egypt   | south Eastern<br>Desert | Allaqi-Heiani<br>Suture   | Wadi Um Ashirah             | quartz-diorite                          | U-Pb   | 709±4    | zircon    | SHRIMP II     | crystallization<br>age              | OCEANIC                 |             | 90     |
| 289 | 33.6650 | 25.5350 | fm        | Egypt   | East Saharan<br>Croton  | central<br>Eastern Desert | Gabel El Shalul<br>area     | granite                                 | U-Pb   | 637 ± 5  | zircon    | LA-ICP-MS     | crystallization<br>age              | INTRA-PLATE             |             | 91     |
| 290 | 33.6750 | 25.5440 | fm        | Egypt   | East Saharan<br>Croton  | central<br>Eastern Desert | Gabel El Shalul<br>area     | granite                                 | U-Pb   | 631 ± 6  | zircon    | LA-ICP-MS     | crystallization<br>age              | INTRA-PLATE             |             | 91     |
| 291 | 34.9436 | 23.4556 |           | Egypt   | East Saharan<br>Croton  | south Eastern<br>Desert   | Wadi Beitan<br>granitoid    | tonalitic gneiss                        | U-Pb   | 719 ± 10 | zircon    | SHRIMP II     | magmatic<br>emplacement             | ARC                     |             | 92     |
| 292 | 35.0049 | 23.2959 |           | Egypt   | East Saharan<br>Croton  | south Eastern<br>Desert   | Wadi Beitan<br>granitoid    | Granodioritic<br>gneiss                 | U-Pb   | 725 ± 9  | zircon    | SHRIMP II     | magmatic<br>emplacement             | ARC                     |             | 92     |
| 293 | 35.0090 | 23.3326 |           | Egypt   | East Saharan<br>Croton  | south Eastern<br>Desert   | Wadi Beitan<br>granitoid    | tonalitic to<br>granodioritic<br>gneiss | U-Pb   | 744 ± 10 | zircon    | SHRIMP II     | magmatic<br>emplacement             | ARC                     |             | 92     |
| 294 | 34.5643 | 29.0577 |           | Egypt   | East Saharan<br>Croton  | south Eastern<br>Desert   | Wadi Ghazala                | granite                                 | U-Pb   | 582 ± 6  | zircon    | SHRIMP        | crystallization<br>age              | RIFTING                 |             | 93     |
| 295 | 34.2813 | 28.5001 |           | Egypt   | East Saharan<br>Croton  | south Eastern<br>Desert   | Wadi Nasb                   | granite                                 | U-Pb   | 594 ± 8  | zircon    | SHRIMP        | crystallization<br>age              | RIFTING                 |             | 93     |
| 296 | 34.0706 | 28.0472 |           | Egypt   | East Saharan<br>Croton  | south Eastern<br>Desert   | Wadi Lithi                  | monzogranite                            | U-Pb   | 594 ± 14 | zircon    | SHRIMP        | crystallization<br>age              | RIFTING                 |             | 93     |

| NO  | LON     | LAT     | ORG.* | COUNTRY | TECTONIC DIVISION      | UNIT                             | UNIT NAME          | ROCK                   | METHOD | AGE (Ma)  | MINERAL          | AGETYPE     | MEANING             | TECTONIC ENVIRONMENT | CROSREF | ORGREF |
|-----|---------|---------|-------|---------|------------------------|----------------------------------|--------------------|------------------------|--------|-----------|------------------|-------------|---------------------|----------------------|---------|--------|
| 297 | 34.0835 | 28.0167 |       | Egypt   | East Saharan Croton    | south Eastern Desert             | Wadi Lithi         | alkali-granite         | U-Pb   | 579 ± 9   | zircon           | SHRIMP      | crystallization age | RIFTING              |         | 93     |
| 298 | 33.7678 | 28.9847 |       | Egypt   | East Saharan Croton    | south Eastern Desert             | Wadi Seih          | alkali-granite         | U-Pb   | 591 ± 6   | zircon           | SHRIMP      | crystallization age | RIFTING              |         | 93     |
| 299 | 34.2200 | 25.6283 |       | Egypt   | central Eastern Desert | El-Sibai area                    | El-Shush           | granodioritic gneiss   | U-Pb   | 682 ± 4   | zircon           | ID-TIMS     | crystallization age | ARC                  |         | 94     |
| 300 | 34.2200 | 25.6283 |       | Egypt   | central Eastern Desert | El-Sibai area                    | El-Shush           | granitic gneiss        | U-Pb   | 679 ± 2   | zircon           | ID-TIMS     | crystallization age | ARC                  |         | 94     |
| 301 | 34.2169 | 25.6277 |       | Egypt   | central Eastern Desert | El-Sibai area                    | El-Shush           | coarse granitic gneiss | U-Pb   | 685 ± 3   | zircon           | ID-TIMS     | crystallization age | ARC                  |         | 94     |
| 302 | 34.4322 | 25.6201 |       | Egypt   | central Eastern Desert | El-Sibai area                    | Umm Gheigh         | anorthosite            | U-Pb   | 541 ± 2   | zircon           | ID-TIMS     | crystallization age | RIFTING              |         | 94     |
| 303 | 34.4368 | 25.6149 |       | Egypt   | central Eastern Desert | El-Sibai area                    | Umm Gheigh         | syenogranite dyke      | U-Pb   | 540 ± 2   | zircon           | ID-TIMS     | crystallization age | RIFTING              |         | 94     |
| 304 | 34.2252 | 25.6190 |       | Egypt   | East Saharan Croton    | Eastern Desert                   | Sibai core complex | orthogneiss            | Pb-Pb  | 694 ±27   | zircon           | evaporation | crystallization age | ARC                  | 84      | 95     |
| 305 | 34.2600 | 25.6093 |       | Egypt   | East Saharan Croton    | Eastern Desert                   | Sibai core complex | orthogneiss            | Pb-Pb  | 679 ±7    | zircon           | evaporation | crystallization age | ARC                  | 84      | 95     |
| 306 | 34.2391 | 25.6376 |       | Egypt   | East Saharan Croton    | Eastern Desert                   | Sibai core complex | orthogneiss            | Pb-Pb  | 659 ±14   | zircon           | evaporation | crystallization age | ARC                  | 84      | 95     |
| 307 | 34.2490 | 25.7750 |       | Egypt   | East Saharan Croton    | Eastern Desert                   | Sibai core complex | granite                | Pb-Pb  | 654 ±34   | zircon           | evaporation | Exhumation-related  | INTRA-PLATE          | 84      | 95     |
| 308 | 34.2758 | 25.7091 |       | Egypt   | East Saharan Croton    | Eastern Desert                   | Sibai core complex | granite                | Pb-Pb  | 653 ±15   | zircon           | evaporation | Exhumation-related  | INTRA-PLATE          | 84      | 95     |
| 309 | 34.2391 | 25.6376 |       | Egypt   | East Saharan Croton    | Eastern Desert                   | Sibai core complex | granite                | Pb-Pb  | 645 ±5    | zircon           | evaporation | Exhumation-related  | INTRA-PLATE          | 84      | 95     |
| 310 | 34.2391 | 25.6376 |       | Egypt   | East Saharan Croton    | Eastern Desert                   | Sibai core complex | orthogneiss            | Pb-Pb  | 658 ± 16  | zircon           | evaporation | crystallization age | ARC                  | 84      | 95     |
| 311 | 34.1848 | 25.7472 |       | Egypt   | East Saharan Croton    | Eastern Desert                   | Sibai core complex | granite                | Pb-Pb  | 657 ± 24  | zircon           | evaporation | crystallization age | ARC                  | 84      | 95     |
| 312 | 34.5553 | 24.8221 |       | Egypt   | East Saharan Croton    | Central and South Eastern Desert | Nugrus             | biotite granite        | U-Pb   | 595.1±3.7 | zircon+titanite  | ID-TIMS     | crystallization age | POST-OROGENIC        |         | 96     |
| 313 | 34.5780 | 24.8400 |       | Egypt   | East Saharan Croton    | Central and South Eastern Desert | Hangalia           | granite                | U-Pb   | 629.3±4.6 | zircon           | ID-TIMS     | crystallization age | SYN-OROGENIC         |         | 96     |
| 314 | 34.7161 | 24.7668 |       | Egypt   | East Saharan Croton    | Central and South Eastern Desert | Zabara             | orthogneiss            | U-Pb   | 632.5±4.6 | zircon+polycrase | ID-TIMS     | crystallization age | SYN-OROGENIC         |         | 96     |
| 315 | 34.5159 | 24.8105 |       | Egypt   | East Saharan Croton    | Central and South Eastern Desert | Migmatitic         | tonalite gneiss        | U-Pb   | 590.1±1.9 | titanite         | ID-TIMS     | age of metamorphism | FAULTING             |         | 96     |
| 316 | 34.5159 | 24.8105 |       | Egypt   | East Saharan Croton    | Central and South Eastern Desert | Migmatitic         | tonalite gneiss        | U-Pb   | 658.8±5.3 | zircon+titanite  | ID-TIMS     | crystallization age | SYN-OROGENIC         |         | 96     |

| NO  | LON     | LAT     | ORG.* | COUNTRY | TECTONIC DIVISION     | UNIT                             | UNIT NAME                          | ROCK            | METHOD | AGE (Ma) | MINERAL    | AGETYPE         | MEANING                    | TECTONIC ENVIRONMENT | CROSREF | ORGREF |
|-----|---------|---------|-------|---------|-----------------------|----------------------------------|------------------------------------|-----------------|--------|----------|------------|-----------------|----------------------------|----------------------|---------|--------|
| 317 | 34.9306 | 24.5597 |       | Egypt   | East Saharan Croton   | Central and South Eastern Desert | El Sukkari                         | granite         | U-Pb   | 689±2.5  | zircon     | ID-TIMS         | crystallization age        | SYN-OROGENIC         |         | 96     |
| 318 | -5.0731 | 33.3853 | nc    | Morocco | Anti-Atlas Orogen     | Bleïda Group                     | Iridi                              | orthogneiss     | U-Pb   | 743 ±14  | zircon     | SHRIMP          | magmatic age               | ARC                  |         | 97     |
| 319 | -7.3880 | 30.0540 | fm    | Morocco | Anti-Atlas Orogen     | Bou Salda Formation              | Tadmant                            | rhyolites       | U-Pb   | 605 ±9   | zircon     | SHRIMP          | crystallization age        | LATE/POST-OROGENIC   |         | 97     |
| 320 | -7.7440 | 30.5260 | fm    | Morocco | Anti-Atlas Orogen     | Bou Salda Formation              | Tamriwine                          | rhyolites       | U-Pb   | 606 ±6   | zircon     | SHRIMP          | crystallization age        | LATE/POST-OROGENIC   |         | 97     |
| 321 | -7.6550 | 31.4570 | fm    | Morocco | Anti-Atlas Orogen     | Assarag Suite                    | Amlouggui                          | tonalite        | U-Pb   | 586±8    | zircon     | SHRIMP          | magmatic age               | LATE/POST-OROGENIC   |         | 97     |
| 322 | -7.7820 | 30.6590 | fm    | Morocco | Anti-Atlas Orogen     | Assarag Suite                    | Askaoun                            | granodiorite    | U-Pb   | 575±8    | zircon     | SHRIMP          | magmatic age               | LATE/POST-OROGENIC   |         | 97     |
| 323 | -7.6670 | 31.2180 | fm    | Morocco | Anti-Atlas Orogen     | Assarag Suite                    | Tourcht                            | diorite         | U-Pb   | 579±7    | zircon     | SHRIMP          | magmatic age               | LATE/POST-OROGENIC   |         | 97     |
| 324 | -7.7160 | 30.2670 | fm    | Morocco | Anti-Atlas Orogen     | Assarag Suite                    | Mzil                               | granite         | U-Pb   | 614 ±10  | zircon     | SHRIMP          | magmatic age               | LATE/POST-OROGENIC   |         | 97     |
| 325 | -7.7130 | 30.2680 | fm    | Morocco | Anti-Atlas Orogen     | Sirwa Window                     | Mzil                               | granite         | Rb-Sr  | 582 ±10  | biotite-Wr | isochrone       | cooling age (metamorphism) | RIFTING              |         | 97     |
| 326 | -7.3570 | 30.0740 | fm    | Morocco | Anti-Atlas Orogen     | Sirwa Window                     | Tilsakht                           | granite         | Rb-Sr  | 525 ±12  | biotite-Wr | isochrone       | cooling age (metamorphism) | RIFTING              |         | 97     |
| 327 | -7.6470 | 30.6010 | fm    | Morocco | Anti-Atlas Orogen     | Sirwa Window                     | Askaoun                            | granite         | Rb-Sr  | 559 ±8   | biotite-Wr | isochrone       | cooling age (metamorphism) | RIFTING              |         | 97     |
| 328 | -7.3990 | 30.8580 | fm    | Morocco | Anti-Atlas Orogen     | Ouarzazate Group                 | Tiffist Formation                  | rhyolites       | U-Pb   | 571 ±8   | zircon     | SHRIMP          | crystallization age        | POST-OROGENIC        |         | 97     |
| 329 | -7.3410 | 29.5380 | fm    | Morocco | Anti-Atlas Orogen     | Ouarzazate Group                 | Aguins Member                      | rhyolites       | U-Pb   | 577 ±6   | zircon     | SHRIMP          | crystallization age        | POST-OROGENIC        |         | 97     |
| 330 | -7.3570 | 30.0740 | fm    | Morocco | Anti-Atlas Orogen     | Ouarzazate Group                 | Tilsakht                           | granite         | U-Pb   | 579 ±7   | zircon     | SHRIMP          | crystallization age        | LATE/POST-OROGENIC   |         | 97     |
| 331 | -7.8910 | 30.8750 | fm    | Morocco | Anti-Atlas Orogen     | Ouarzazate Group                 | Imourksane                         | granite         | U-Pb   | 562 ±5   | zircon     | SHRIMP          | crystallization age        | LATE/POST-OROGENIC   |         | 97     |
| 332 | -7.6470 | 30.6010 | fm    | Morocco | Anti-Atlas Orogen     | Achkoukchi Complex               | Tazoult                            | quartz Porphyry | U-Pb   | 559 ±6   | zircon     | SHRIMP          | crystallization age        | LATE/POST-OROGENIC   |         | 97     |
| 333 | 5.2350  | 7.4820  | fm    | Nigeria | Arabian-Nubian Shield | SE Arabian Shield                | Akure-Ikerre-Ado Ekiti association | charnockite     | U-Pb   | 620 ±20  | zircon     | upper intercept | crystallization age        | LATE-OROGENIC        |         | 98     |
| 334 | 5.1400  | 7.3230  | fm    | Nigeria | Arabian-Nubian Shield | SE Arabian Shield                | Akure-Ikerre-Ado Ekiti association | charnockite     | U-Pb   | 634 ±21  | zircon     | upper intercept | crystallization age        | LATE-OROGENIC        |         | 98     |
| 335 | 5.2290  | 7.2640  | fm    | Nigeria | Arabian-Nubian Shield | SE Arabian Shield                | Akure-Ikerre-Ado Ekiti association | granite         | U-Pb   | 621 ±10  | zircon     | upper intercept | crystallization age        | LATE-OROGENIC        |         | 98     |
| 336 | 5.1040  | 7.0280  | fm    | Nigeria | Arabian-Nubian Shield | SE Arabian Shield                | Idanre association                 | charnockite     | U-Pb   | 580 ±10  | zircon     | upper intercept | crystallization age        | LATE-OROGENIC        |         | 98     |
| 337 | 5.1090  | 7.1180  | fm    | Nigeria | Arabian-Nubian Shield | SE Arabian Shield                | Idanre association                 | charnockite     | U-Pb   | 593 ± 13 | zircon     | upper intercept | crystallization age        | LATE-OROGENIC        |         | 98     |
| 338 | 5.1320  | 7.0410  | fm    | Nigeria | Arabian-Nubian Shield | SE Arabian Shield                | Idanre association                 | granite         | U-Pb   | 587 ±10  | zircon     | upper intercept | crystallization age        | LATE-OROGENIC        |         | 98     |

| NO  | LON     | LAT     | ORG.<br>* | COUNTRY | TECTONIC<br>DIVISION         | UNIT                         | UNIT NAME                      | ROCK                                   | METHOD | AGE (Ma)         | MINERAL             | AGETYPE            | MEANING                        | TECTONIC<br>ENVIRONMENT | CROSRE<br>F | ORGREF |
|-----|---------|---------|-----------|---------|------------------------------|------------------------------|--------------------------------|----------------------------------------|--------|------------------|---------------------|--------------------|--------------------------------|-------------------------|-------------|--------|
| 339 | 17.0900 | 13.0267 |           | Chad    | Central African<br>Fold Belt | Central African<br>Fold Belt | Guéra Massif                   | granite                                | U-Pb   | 568 ± 7          | zircon              | LA-ICP-MS          | crystallization<br>age         | POST-<br>OROGENIC       |             | 99     |
| 340 | 18.2783 | 12.6167 |           | Chad    | Central African<br>Fold Belt | Central African<br>Fold Belt | Guéra Massif                   | granite                                | U-Pb   | 595 ± 8          | zircon              | LA-ICP-MS          | crystallization<br>age         | ARC                     |             | 99     |
| 341 | 18.4817 | 10.8567 |           | Chad    | Central African<br>Fold Belt | Central African<br>Fold Belt | Guéra Massif                   | granite                                | U-Pb   | 556 ± 7          | zircon              | LA-ICP-MS          | crystallization<br>age         | POST-<br>OROGENIC       |             | 99     |
| 342 | 19.0067 | 11.4783 |           | Chad    | Central African<br>Fold Belt | Central African<br>Fold Belt | Guéra Massif                   | granite                                | U-Pb   | 589 ± 6          | zircon              | LA-ICP-MS          | crystallization<br>age         | ARC                     |             | 99     |
| 343 | 19.6767 | 12.2067 |           | Chad    | Central African<br>Fold Belt | Central African<br>Fold Belt | Guéra Massif                   | granite                                | U-Pb   | 561 ± 6          | zircon              | LA-ICP-MS          | crystallization<br>age         | POST-<br>OROGENIC       |             | 99     |
| 344 | 19.5317 | 11.9083 |           | Chad    | Central African<br>Fold Belt | Central African<br>Fold Belt | Guéra Massif                   | granite                                | U-Pb   | 591 ± 10         | zircon              | LA-ICP-MS          | crystallization<br>age         | ARC                     |             | 99     |
| 345 | 19.5183 | 11.9083 |           | Chad    | Central African<br>Fold Belt | Central African<br>Fold Belt | Guéra Massif                   | granite                                | U-Pb   | 550 ± 11         | zircon              | LA-ICP-MS          | crystallization<br>age         | POST-<br>OROGENIC       |             | 99     |
| 346 | 18.8483 | 12.1983 |           | Chad    | Central African<br>Fold Belt | Central African<br>Fold Belt | Guéra Massif                   | rhyolite                               | U-Pb   | 568 ± 6          | zircon              | LA-ICP-MS          | crystallization<br>age         | POST-<br>OROGENIC       |             | 99     |
| 347 | 16.3183 | 13.7267 |           | Chad    | Central African<br>Fold Belt | Central African<br>Fold Belt | Ngoura                         | granite                                | U-Pb   | 551 ± 6          | zircon              | LA-ICP-MS          | crystallization<br>age         | POST-<br>OROGENIC       |             | 99     |
| 348 | 16.0200 | 12.7800 |           | Chad    | Central African<br>Fold Belt | Central African<br>Fold Belt | Moyto                          | granite                                | U-Pb   | 545 ± 6          | zircon              | LA-ICP-MS          | crystallization<br>age         | POST-<br>OROGENIC       |             | 99     |
| 349 | 16.3520 | 9.0950  |           | Chad    | Central African<br>Fold Belt | Central African<br>Fold Belt | Doba basin                     | diorite                                | U-Pb   | 572.59 ±<br>0.33 | zircon              | CA-ID TIMS         | crystallization<br>age         | POST-<br>OROGENIC       |             | 99     |
| 350 | 32.9400 | 16.2883 | cop       | Sudan   | East Saharan<br>Croton       | Nubian Shield                | Sabaloka granulites            | granulites of<br>igneous<br>derivation | Rb-Sr  | 720± 72          | WR                  | isochrone          | crystallization<br>age         | ARC                     |             | 100    |
| 351 | 32.9400 | 16.2883 | cop       | Sudan   | East Saharan<br>Croton       | Nubian Shield                | Sabaloka granulites            | granulites of<br>igneous<br>derivation | U-Pb   | 719 ± 81         | zircon              | SHRIMP             | crystallization<br>age         | ARC                     |             | 100    |
| 352 | 5.4558  | 22.5358 | nc        | Algeria | Saharan<br>metacraton        | Central<br>Hoggar            | Tin Amzi complex               | granodiorite                           | U-Pb   | 578 ± 6          | sphene+mona<br>zite | concordant<br>age  | cooling age                    | ?                       |             | 101    |
| 353 | 5.3931  | 22.4350 | nc        | Algeria | Saharan<br>metacraton        | Central<br>Hoggar            | Tin Amzi complex               | granodiorite                           | U-Pb   | 612 +50/-20      | zircon              | upper<br>intercept | crystallization<br>age         | SYN/LATE-<br>OROGENIC   |             | 101    |
| 354 | 5.4736  | 22.6478 | nc        | Algeria | Saharan<br>metacraton        | Central<br>Hoggar            | Anfeg                          | granite                                | U-Pb   | 615 ± 5          | zircon              | upper<br>intercept | crystallization<br>age         | SYN/LATE-<br>OROGENIC   |             | 101    |
| 355 | 34.3500 | 24.4000 | cop       | Egypt   | Eastern Desert               | Meatiq and<br>Hafafit domes  | Hafafit complex                | granite gneiss                         | Rb-Sr  | 609 ± 17         | WR                  | isochrone          | cooling<br>(formation)<br>age  | ARC                     |             | 102    |
| 356 | -7.5410 | 30.8239 |           | Morocco | Anti-Atlas<br>region         | Sirwa inlier                 | Tasriwine ophiolite<br>complex | amphibolite                            | Sm-Nd  | 647.2 ± 1.7      | WR- bulk-<br>garnet | isochrone          | High grade<br>metamorphis<br>m | METAMORPHISM            |             | 103    |
| 357 | -4.9206 | 31.4158 | fm        | Morocco | Eastern Anti-<br>Atlas       | Ougnat                       | Bou Madine rhyolitic<br>dome   | rhyolite                               | U-Pb   | 552±5            | zircon              | SIMS               | crystallization<br>age         | RIFTING                 |             | 104    |

| NO  | LON     | LAT     | ORG.<br>* | COUNTRY | TECTONIC<br>DIVISION | UNIT                | UNIT NAME                   | ROCK             | METHOD | AGE (Ma)        | MINERAL | AGETYPE   | MEANING             | TECTONIC<br>ENVIRONMENT | CROSRE<br>F | ORGREF |
|-----|---------|---------|-----------|---------|----------------------|---------------------|-----------------------------|------------------|--------|-----------------|---------|-----------|---------------------|-------------------------|-------------|--------|
| 358 | -5.7281 | 31.3475 | fm        | Morocco | Eastern Anti-Atlas   | Saghro–Imiter       | Tachkakacht rhyolitic dyke  | rhyolite         | U-Pb   | 543±9           | zircon  | SIMS      | crystallization age | RIFTING                 |             | 104    |
| 359 | -6.8164 | 30.5253 | fm        | Morocco | Central Anti-Atlas   | Bou Azzer           | Aghbar trachytic sill       | trachyte         | U-Pb   | 531±5           | zircon  | SIMS      | crystallization age | RIFTING                 |             | 104    |
| 360 | -6.6703 | 30.4786 | nc        | Morocco | Central Anti-Atlas   | Bou Azzer           | Jbel Boho                   | syenite          | U-Pb   | 534 +10         | zircon  | IDTIMS    | crystallization age | RIFTING                 |             | 105    |
| 361 | -5.7281 | 31.3475 | nc        | Morocco | Central Anti-Atlas   | Bou Azzer           | Bou Azzer                   | volcanic ?       | U-Pb   | 522.4 ±2        | zircon  | IDTIMS    | crystallization age | RIFTING                 |             | 106    |
| 362 | -5.7281 | 31.3475 | nc        | Morocco | Central Anti-Atlas   | Bou Azzer           | Bou Azzer                   | ash layer        | U-Pb   | 517 ± 1.5       | zircon  | IDTIMS    | crystallization age | RIFTING                 |             | 106    |
| 363 | -8.0036 | 29.8944 | fm        | Morocco | Western Anti-Atlas   | Assif Tifarchat     | Ouarzazate Series           | ignimbrite       | U-Pb   | 565±7           | zircon  | SHRIMP    | extrusion age       | POST-OROGENIC           |             | 107    |
| 364 | -7.5822 | 30.8311 |           | Morocco | Western Anti-Atlas   | Siroua inlier       | Tasriwine ophiolite         | plagiogranites   | U-Pb   | 761.1 +1.9/-1.6 | zircon  | LA-ICP-MS | crystallization age | OP                      |             | 108    |
| 365 | -7.5822 | 30.8311 |           | Morocco | Western Anti-Atlas   | Siroua inlier       | Tasriwine ophiolite         | plagiogranites   | U-Pb   | 762 + 1/-2      | zircon  | LA-ICP-MS | crystallization age | OP                      |             | 108    |
| 366 | -7.1022 | 30.9550 | nc        | Morocco | Western Anti-Atlas   | Siroua inlier       | Jebel Bachkoun              | rhyolite         | U-Pb   | 580 ± 12        | zircon  | IDTIMS    | extrusion age       | FAULTING                |             | 109    |
| 367 | -7.1364 | 30.9661 | nc        | Morocco | Western Anti-Atlas   | Siroua inlier       | Tiouine                     | ignimbrite       | U-Pb   | 563 ± 10        | zircon  | IDTIMS    | extrusion age       | FAULTING                |             | 109    |
| 368 | -7.1364 | 30.9661 | nc        | Morocco | Western Anti-Atlas   | Siroua inlier       | Tiouine                     | ignimbrite       | U-Pb   | 586 ± 20        | zircon  | IDTIMS    | extrusion age       | FAULTING                |             | 109    |
| 369 | -6.0657 | 30.9822 |           | Morocco | Western Anti-Atlas   | Jebel Saghro inlier | Jebel Amgroud               | rhyolite flow    | U-Pb   | 556 ± 4         | zircon  | SHRIMP    | extrusion age       | FAULTING                |             | 110    |
| 370 | -6.3481 | 30.8063 |           | Morocco | Western Anti-Atlas   | Jebel Saghro inlier | Oued Alqantrat              | rhyolite flow    | U-Pb   | 558 ± 4         | zircon  | SHRIMP    | extrusion age       | FAULTING                |             | 110    |
| 371 | -6.3427 | 30.8118 |           | Morocco | Western Anti-Atlas   | Jebel Saghro inlier | Lower Ouarzazate Supergroup | rhyolite flow    | U-Pb   | 571 ± 5         | zircon  | SHRIMP    | extrusion age       | FAULTING                |             | 110    |
| 372 | -6.6253 | 30.9500 |           | Morocco | Western Anti-Atlas   | Jebel Saghro inlier | Lower Ouarzazate Supergroup | rhyodacitic tuff | U-Pb   | 571 ± 5         | zircon  | SHRIMP    | extrusion age       | FAULTING                |             | 110    |
| 373 | -6.6001 | 30.9334 |           | Morocco | Western Anti-Atlas   | Jebel Saghro inlier | Oued Dar'a caldera          | rhyolitic tuff   | U-Pb   | 574 ± 7         | zircon  | SHRIMP    | extrusion age       | FAULTING                |             | 110    |
| 374 | -6.3020 | 30.9336 |           | Morocco | Western Anti-Atlas   | Jebel Saghro inlier | Timijt swarm                | rhyolitic dike   | U-Pb   | 562 ± 5         | zircon  | SHRIMP    | extrusion age       | FAULTING                |             | 110    |
| 375 | -6.1665 | 31.0256 |           | Morocco | Western Anti-Atlas   | Jebel Saghro inlier | Isk-n-Alla                  | granite          | U-Pb   | 559 ± 5         | zircon  | SHRIMP    | intrusion age       | POST-OROGENIC           |             | 110    |
| 376 | -6.1265 | 31.0198 |           | Morocco | Western Anti-Atlas   | Jebel Saghro inlier | Tagmout                     | gabbro           | U-Pb   | 556 ± 5         | zircon  | SHRIMP    | intrusion age       | POST-OROGENIC           |             | 110    |
| 377 | -6.2865 | 30.9237 |           | Morocco | Western Anti-Atlas   | Jebel Saghro inlier | Bouskour–Sidi Flah swarm    | rhyolitic dike   | U-Pb   | 563 ± 7         | zircon  | SHRIMP    | extrusion age       | POST-OROGENIC           |             | 110    |
| 378 | -6.2745 | 30.9109 |           | Morocco | Western Anti-Atlas   | Jebel Saghro inlier | Bouskour                    | granite          | U-Pb   | 570 ± 5         | zircon  | SHRIMP    | intrusion age       | POST-OROGENIC           |             | 110    |
| 379 | -6.1332 | 31.1601 |           | Morocco | Western Anti-Atlas   | Jebel Saghro inlier | Wizergane                   | granodiorite     | U-Pb   | 576 ± 5         | zircon  | SHRIMP    | intrusion age       | POST-OROGENIC           |             | 110    |

| NO  | LON     | LAT     | ORG.<br>* | COUNTRY | TECTONIC<br>DIVISION  | UNIT                       | UNIT NAME                         | ROCK                    | METHOD | AGE (Ma)       | MINERAL | AGETYPE     | MEANING       | TECTONIC<br>ENVIRONMENT | CROSRE<br>F | ORGREF |
|-----|---------|---------|-----------|---------|-----------------------|----------------------------|-----------------------------------|-------------------------|--------|----------------|---------|-------------|---------------|-------------------------|-------------|--------|
| 380 | -6.3921 | 30.8479 |           | Morocco | Western Anti-Atlas    | Jebel Saghro inlier        | Assif Tagmout                     | pink microgranite       | U-Pb   | 574 ± 9        | zircon  | SHRIMP      | intrusion age | POST-OROGENIC           |             | 110    |
| 381 | -6.3582 | 30.8074 |           | Morocco | Western Anti-Atlas    | Jebel Saghro inlier        | Zouzmitane                        | microgranite            | U-Pb   | 588 ± 7        | zircon  | SHRIMP      | intrusion age | POST-OROGENIC           |             | 110    |
| 382 | -6.7274 | 30.5296 |           | Morocco | Western Anti-Atlas    | Bou Azzer–El Graara inlier | Tafrawt (El Graara sub-inlier)    | quartz diorite          | U-Pb   | 645 ± 7        | zircon  | SHRIMP      | intrusion age | OROGENIC                |             | 110    |
| 383 | -6.6626 | 30.5156 |           | Morocco | Western Anti-Atlas    | Bou Azzer–El Graara inlier | Tamellalet (El Graara sub-inlier) | quartz diorite          | U-Pb   | 646 ± 8        | zircon  | SHRIMP      | intrusion age | OROGENIC                |             | 110    |
| 384 | -6.7269 | 30.5007 |           | Morocco | Western Anti-Atlas    | Bou Azzer–El Graara inlier | Tazigzaout sub-inlier             | granodiorite            | U-Pb   | 650 ± 10       | zircon  | SHRIMP      | intrusion age | OROGENIC                |             | 110    |
| 385 | 34.9672 | 29.7750 | fm        | Israel  | Arabian-Nubian Shield | Timna igneous complex      | Mounth Timna                      | high-Ti dolerite        | Ar-Ar  | 531.7 ± 4.6    | WR      | convetional | formation     | POST-OROGENIC           |             | 111    |
| 386 | 34.9728 | 29.7744 | fm        | Israel  | Arabian-Nubian Shield | Timna igneous complex      | Mounth Timna                      | dolerite                | K-Ar   | 546.31 ± 10.10 | WR      | convetional | formation     | POST-OROGENIC           |             | 111    |
| 387 | 34.9567 | 29.6622 | fm        | Israel  | Arabian-Nubian Shield | Timna igneous complex      | Mounth Amram                      | dolerite                | K-Ar   | 508.93 ± 9.15  | WR      | stepwise    | formation     | POST-OROGENIC           |             | 111    |
| 388 | 34.9158 | 29.5831 | fm        | Israel  | Arabian-Nubian Shield | Elat complex               | Elat composite dikes              | rhyolite (qtz-porphry)  | U-Pb   | 590 ± 9        | zircon  | ?           | formation     | RIFTING                 | 112         | 113    |
| 389 | 34.8983 | 29.5558 | cop       | Israel  | Arabian-Nubian Shield | Elat complex               | Elat composite dikes              | dacite                  | U-Pb   | 591 ± 13       | zircon  | SIMS        | intrusion age | RIFTING                 | 112         | 113    |
| 390 | 34.8983 | 29.5558 | cop       | Israel  | Arabian-Nubian Shield | Elat complex               | Elat composite dikes              | rhyolite                | U-Pb   | 591 ± 13       | zircon  | SIMS        | intrusion age | RIFTING                 | 112         | 113    |
| 391 | 34.9769 | 29.7803 | fm        | Israel  | Arabian-Nubian Shield | Timna igneous complex      | Timna igneous complex             | quartz monzodiorite     | Pb-Pb  | 599.3 ± 2.0    | zircon  | evaporation | intrusion age | RIFTING                 |             | 114    |
| 392 | 34.9749 | 29.7813 | fm        | Israel  | Arabian-Nubian Shield | Timna igneous complex      | Timna igneous complex             | monzodiorite            | U-Pb   | 602.0 ± 5.2    | zircon  | SIMS        | intrusion age | RIFTING                 |             | 115    |
| 393 | 34.9749 | 29.7813 | fm        | Israel  | Arabian-Nubian Shield | Timna igneous complex      | Timna igneous complex             | monzodiorite            | Pb-Pb  | 610 ± 8        | zircon  | evaporation | intrusion age | RIFTING                 |             | 116    |
| 394 | 34.9708 | 29.7689 | fm        | Israel  | Arabian-Nubian Shield | Timna igneous complex      | Timna igneous complex             | alkali feldspar granite | U-Pb   | 606 ± 3        | zircon  | SIMS        | intrusion age | RIFTING                 |             | 115    |
| 395 | 34.9708 | 29.7689 | fm        | Israel  | Arabian-Nubian Shield | Timna igneous complex      | Timna igneous complex             | alkali feldspar granite | Pb-Pb  | 609 ± 10       | zircon  | evaporation | intrusion age | RIFTING                 |             | 116    |
| 396 | 34.9797 | 29.7753 | fm        | Israel  | Arabian-Nubian Shield | Timna igneous complex      | Timna igneous complex             | olivine norite          | Pb-Pb  | 611 ± 10       | zircon  | evaporation | intrusion age | RIFTING                 |             | 116    |
| 397 | 34.8953 | 29.5531 | fm        | Israel  | Arabian-Nubian Shield | Elat complex               | Yehoshafat granite                | syenogranite            | U-Pb   | 605 ± 4        | zircon  | SIMS        | intrusion age | RIFTING                 |             | 115    |
| 398 | 34.9450 | 29.6581 | fm        | Israel  | Arabian-Nubian Shield | Elat complex               | Amram alcali volcanics            | alkali rhyolite         | U-Pb   | 606 ± 3        | zircon  | SIMS        | intrusion age | RIFTING                 | 115         | 113    |

| NO  | LON     | LAT     | ORG.<br>* | COUNTRY | TECTONIC<br>DIVISION      | UNIT                     | UNIT NAME                                 | ROCK                                                | METHOD | AGE (Ma)    | MINERAL | AGETYPE          | MEANING       | TECTONIC<br>ENVIRONMENT | CROSRE<br>F | ORGREF                            |
|-----|---------|---------|-----------|---------|---------------------------|--------------------------|-------------------------------------------|-----------------------------------------------------|--------|-------------|---------|------------------|---------------|-------------------------|-------------|-----------------------------------|
| 399 | 34.9272 | 29.5219 | fm        | Israel  | Arabian-<br>Nubian Shield | Elat complex             | Elat Shlomo pluton                        | microdiorite                                        | U-Pb   | 614 ± 6     | zircon  | SIMS             | intrusion age | RIFTING                 | 115         | 113                               |
| 400 | 34.9042 | 29.5856 | fm        | Israel  | Arabian-<br>Nubian Shield | Elat complex             | Rehavam pluton                            | bt-ms<br>monzogranite                               | U-Pb   | 630.0 ± 4.9 | zircon  | SIMS             | intrusion age | POST-<br>OROGENIC       | 115         | 113                               |
| 401 | 34.9419 | 29.5881 | fm        | Israel  | Arabian-<br>Nubian Shield | Elat complex             | Elat granite                              | monzogranite                                        | U-Pb   | 634 ± 4     | zircon  | MC-LA-ICP-<br>MS | intrusion age | POST-<br>OROGENIC       |             | 117                               |
| 402 | 34.9744 | 29.7658 | cop       | Israel  | Arabian-<br>Nubian Shield | Timna igneous<br>complex | Timna igneous<br>complex                  | bt<br>monzogranite                                  | U-Pb   | 632 ± 7     | zircon  | SIMS             | intrusion age | POST-<br>OROGENIC       |             | 115                               |
| 403 | 34.9878 | 29.7697 | cop       | Israel  | Arabian-<br>Nubian Shield | Timna igneous<br>complex | Timna igneous<br>complex                  | porphyry<br>granite                                 | Pb-Pb  | 625 ± 5     | zircon  | evaporation      | intrusion age | LATE-OROGENIC           |             | 116                               |
| 404 | 34.9264 | 29.5892 | cop       | Israel  | Arabian-<br>Nubian Shield | Elat complex             | Elat complex                              | quartz diorite                                      | U-Pb   | 634 ± 2     | zircon  | ?                | intrusion age | POST-<br>OROGENIC       |             | 118                               |
| 405 | 34.9400 | 29.5775 | cop       | Israel  | Arabian-<br>Nubian Shield | Elat complex             | Shahmon<br>metabasite pluton              | quartz-diorite                                      | U-Pb   | 672 ± 4     | zircon  | MC-LA-ICP-<br>MS | intrusion age | POST-<br>OROGENIC       |             | 117                               |
| 406 | 34.9031 | 29.5786 | cop       | Israel  | Arabian-<br>Nubian Shield | Elat complex             | Roded quartz<br>dioritic gneiss<br>pluton | hbl-bt quartz<br>dioritic to<br>tonalitic<br>gneiss | U-Pb   | 742 ± 6     | zircon  | ?                | intrusion age | ARC                     | 78          | Be'eri-<br>Shlevin pers.<br>Comm. |
| 407 | 34.9799 | 29.6890 |           | Israel  | Arabian-<br>Nubian Shield | Elat complex             | Shahmon<br>metabasite pluton              | high alumina<br>hb gabbro                           | Pb-Pb  | 640 ± 10    | zircon  | evaporation      | intrusion age | POST-<br>OROGENIC       | 84          | 119                               |
| 408 | 34.9608 | 29.6811 |           | Israel  | Arabian-<br>Nubian Shield | Elat complex             | Elat gneiss pluton                        | granitic gneiss                                     | Pb-Pb  | 744 ± 5     | zircon  | evaporation      | intrusion age | ARC                     | 84          | 119                               |
| 409 | 34.8261 | 29.4336 |           | Israel  | Arabian-<br>Nubian Shield | Taba region              | Fiord pluton                              | bt tonalitic<br>gneiss                              | Pb-Pb  | 765 ± 6     | zircon  | evaporation      | intrusion age | ARC                     | 84          | 119                               |
| 410 | 34.9032 | 29.4936 |           | Israel  | Arabian-<br>Nubian Shield | Taba region              | Taba pluton                               | bt tonalitic<br>gneiss                              | Pb-Pb  | 779 ± 8     | zircon  | evaporation      | intrusion age | ARC                     | 84          | 119                               |
| 411 | 34.9799 | 29.6890 |           | Israel  | Arabian-<br>Nubian Shield | Elat complex             | Shahmon                                   | metadiorite                                         | Pb-Pb  | 643 ± 9     | zircon  | evaporation      | intrusion age | POST-<br>OROGENIC       |             | 119                               |
| 412 | 34.9799 | 29.6890 |           | Israel  | Arabian-<br>Nubian Shield | Elat complex             | Shahmon                                   | metadiorite                                         | Pb-Pb  | 641 ± 6     | zircon  | evaporation      | intrusion age | POST-<br>OROGENIC       |             | 119                               |
| 413 | 34.8247 | 29.4606 |           | Egypt   | Arabian-<br>Nubian Shield | Taba region              | Taba                                      | gneiss                                              | Pb-Pb  | 782 ± 9     | zircon  | evaporation      | intrusion age | ARC                     |             | 119                               |
| 414 | 34.8261 | 29.4336 |           | Egypt   | Arabian-<br>Nubian Shield | Taba region              | Fjord                                     | gneiss                                              | Pb-Pb  | 767 ± 5     | zircon  | evaporation      | intrusion age | ARC                     |             | 119                               |
| 415 | 37.1500 | 18.7500 |           | Sudan   | Arabian-<br>Nubian Shield | Red Sea Hills            | Erkowit                                   | granite                                             | Pb-Pb  | 856 ± 10    | zircon  | evaporation      | intrusion age | ARC                     |             | 120                               |
| 416 | 37.1780 | 18.8013 |           | Sudan   | Arabian-<br>Nubian Shield | Red Sea Hills            | Khor Dehand                               | granodiorite                                        | Pb-Pb  | 871 ± 10    | zircon  | evaporation      | intrusion age | ARC                     |             | 120                               |
| 417 | 37.8833 | 17.8833 |           | Sudan   | Arabian-<br>Nubian Shield | Red Sea Hills            | Khor Sebat                                | felsic<br>metavolcanic                              | Pb-Pb  | 840 ± 16    | zircon  | evaporation      | intrusion age | ARC                     |             | 120                               |

| NO  | LON     | LAT     | ORG.<br>* | COUNTRY | TECTONIC<br>DIVISION      | UNIT                                 | UNIT NAME                 | ROCK                   | METHOD | AGE (Ma)    | MINERAL | AGETYPE     | MEANING       | TECTONIC<br>ENVIRONMENT | CROSRE<br>F | ORGREF |
|-----|---------|---------|-----------|---------|---------------------------|--------------------------------------|---------------------------|------------------------|--------|-------------|---------|-------------|---------------|-------------------------|-------------|--------|
| 418 | 38.2500 | 18.0333 |           | Sudan   | Arabian-<br>Nubian Shield | Red Sea Hills                        | Jabal Dirtet              | rhyolite               | Pb-Pb  | 854 ± 18    | zircon  | evaporation | intrusion age | ARC                     |             | 120    |
| 419 | 38.1300 | 18.1390 |           | Sudan   | Arabian-<br>Nubian Shield | Red Sea Hills                        | Jabal Debir Anka          | granitoid              | Pb-Pb  | 827 ± 33    | zircon  | evaporation | intrusion age | ARC                     |             | 120    |
| 420 | 37.8083 | 18.0363 |           | Sudan   | Arabian-<br>Nubian Shield | Red Sea Hills                        | Jabal Um Achabe           | granite                | Pb-Pb  | 652 ± 14    | zircon  | evaporation | intrusion age | POST-<br>OROGENIC       |             | 120    |
| 421 | 36.9350 | 18.9320 |           | Sudan   | Arabian-<br>Nubian Shield | Nafirdeib<br>Series                  | Aquaba                    | rhyolites              | Pb-Pb  | 887±20      | zircon  | evaporation | intrusion age | ARC                     |             | 121    |
| 422 | 36.9350 | 18.9320 |           | Sudan   | Arabian-<br>Nubian Shield | Nafirdeib<br>Series                  | Aquaba                    | rhyolites              | Pb-Pb  | 868±10      | zircon  | evaporation | intrusion age | ARC                     |             | 121    |
| 423 | 37.1536 | 19.0633 |           | Sudan   | Arabian-<br>Nubian Shield | Nafirdeib<br>Series                  | Suakin                    | granite                | U-Pb   | 854±9       | zircon  | IDTIMS      | intrusion age | ARC                     |             | 121    |
| 424 | 32.8598 | 18.5357 |           | Sudan   | Arabian-<br>Nubian Shield | Bayuda Desert<br>and Sabaloka        | El Melagi                 | gneiss                 | U-Pb   | 917 ± 14    | zircon  | SHRIMP      | intrusion age | OROGENIC                |             | 122    |
| 425 | 33.5125 | 19.0605 |           | Sudan   | Arabian-<br>Nubian Shield | Bayuda Desert<br>and Sabaloka        | Dam Et Tor                | gneiss                 | U-Pb   | 858 ± 7     | zircon  | SHRIMP      | intrusion age | ARC                     |             | 122    |
| 426 | 33.4074 | 18.9459 |           | Sudan   | Arabian-<br>Nubian Shield | Bayuda Desert<br>and Sabaloka        | Absol                     | granodiorite           | U-Pb   | 900 ± 9     | zircon  | SHRIMP      | intrusion age | POST-<br>OROGENIC       |             | 122    |
| 427 | 33.2238 | 18.7094 |           | Sudan   | Arabian-<br>Nubian Shield | Bayuda Desert<br>and Sabaloka        | An Ithnein                | granite                | U-Pb   | 597 ± 4     | zircon  | SHRIMP      | intrusion age | POST-<br>OROGENIC       |             | 122    |
| 428 | 32.8173 | 16.3114 |           | Sudan   | Arabian-<br>Nubian Shield | Bayuda Desert<br>and Sabaloka        | Banjedid                  | granite                | U-Pb   | 605 ± 4     | zircon  | SHRIMP      | intrusion age | POST-<br>OROGENIC       |             | 122    |
| 429 | 32.7388 | 16.3383 |           | Sudan   | Arabian-<br>Nubian Shield | Bayuda Desert<br>and Sabaloka        | Babdos                    | shoshonitic<br>granite | U-Pb   | 591 ± 5     | zircon  | SHRIMP      | intrusion age | POST-<br>OROGENIC       |             | 122    |
| 430 | 33.1667 | 27.3333 |           | Egypt   | Arabian-<br>Nubian Shield | Eastern Desert                       | Abu Harba                 | granite                | U-Pb   | 595.3 ± 3.3 | zircon  | SHRIMP      | intrusion age | POST-<br>OROGENIC       |             | 123    |
| 431 | 33.3333 | 27.1667 |           | Egypt   | Arabian-<br>Nubian Shield | Eastern Desert                       | Qattar                    | granite                | U-Pb   | 604.8 ± 3.3 | zircon  | SHRIMP      | intrusion age | POST-<br>OROGENIC       |             | 123    |
| 432 | 33.5000 | 26.5000 |           | Egypt   | Arabian-<br>Nubian Shield | Eastern Desert                       | Qena–Safaga               | granite                | U-Pb   | 652.5 ± 2.6 | zircon  | SHRIMP      | intrusion age | ARC                     |             | 123    |
| 433 | 33.4333 | 26.3333 |           | Egypt   | Arabian-<br>Nubian Shield | Eastern Desert                       | Al Missikat               | granite                | U-Pb   | 596.5 ± 7   | zircon  | SHRIMP      | intrusion age | POST-<br>OROGENIC       |             | 123    |
| 434 | 33.8333 | 22.6333 |           | Egypt   | Arabian-<br>Nubian Shield | Eastern Desert                       | Um Ara                    | granite                | U-Pb   | 603 ± 14    | zircon  | SHRIMP      | intrusion age | POST-<br>OROGENIC       |             | 123    |
| 435 | 35.6667 | 22.6083 |           | Egypt   | Arabian-<br>Nubian Shield | Eastern Desert                       | Jabal Hamrdom             | granite                | U-Pb   | 585 ± 41    | zircon  | SHRIMP      | intrusion age | POST-<br>OROGENIC       | 84          | 124    |
| 436 | 33.2933 | 27.2369 |           | Egypt   | Arabian-<br>Nubian Shield | Dokhan<br>Volcanics,<br>Gebel Dokhan | Wadi Abu Maamel<br>Dokhan | andesite?              | U-Pb   | 602 ± 9     | zircon  | SHRIMP      | intrusion age | POST-<br>OROGENIC       | 84          | 125    |
| 437 | 33.2744 | 27.2358 |           | Egypt   | Arabian-<br>Nubian Shield | Dokhan<br>Volcanics,<br>Gebel Dokhan | Wadi Abu Maamel           | andesite?              | U-Pb   | 593 ± 13    | zircon  | SHRIMP      | intrusion age | POST-<br>OROGENIC       | 84          | 125    |



| NO  | LON     | LAT     | ORG.<br>* | COUNTRY      | TECTONIC<br>DIVISION  | UNIT                  | UNIT NAME        | ROCK               | METHOD | AGE (Ma) | MINERAL | AGETYPE | MEANING       | TECTONIC<br>ENVIRONMENT | CROSRE<br>F | ORGREF |
|-----|---------|---------|-----------|--------------|-----------------------|-----------------------|------------------|--------------------|--------|----------|---------|---------|---------------|-------------------------|-------------|--------|
| 438 | 39.4892 | 22.4710 |           | Saudi Arabia | Arabian-Nubian Shield | Bi'r Umq suture zone  | Qudayd           | metatonalite       | U-Pb   | 782 ± 7  | zircon  | SHRIMP  | intrusion age | SYN-OROGENIC            |             | 126    |
| 439 | 39.5598 | 22.4158 |           | Saudi Arabia | Arabian-Nubian Shield | Bi'r Umq suture zone  | Samran group     | rhyolite           | U-Pb   | 777 ± 28 | zircon  | SHRIMP  | intrusion age | PRE-OROGENIC            |             | 126    |
| 440 | 39.7374 | 22.3766 |           | Saudi Arabia | Arabian-Nubian Shield | Bi'r Umq suture zone  | Samran group     | dacite             | U-Pb   | 753 ± 6  | zircon  | SHRIMP  | intrusion age | PRE-OROGENIC            |             | 126    |
| 441 | 39.7615 | 22.3183 |           | Saudi Arabia | Arabian-Nubian Shield | Bi'r Umq suture zone  | Samran group     | andesite           | U-Pb   | 752 ± 4  | zircon  | SHRIMP  | intrusion age | PRE-OROGENIC            |             | 126    |
| 442 | 39.7939 | 22.2775 |           | Saudi Arabia | Arabian-Nubian Shield | Bi'r Umq suture zone  | Nakhu            | granite            | U-Pb   | 699 ± 7  | zircon  | SHRIMP  | intrusion age | POST-OROGENIC           |             | 126    |
| 443 | 39.8166 | 22.2548 |           | Saudi Arabia | Arabian-Nubian Shield | Bi'r Umq suture zone  | kamil            | diorite            | U-Pb   | 802 ± 5  | zircon  | SHRIMP  | intrusion age | PRE-OROGENIC            |             | 126    |
| 444 | 39.5902 | 22.5517 |           | Saudi Arabia | Arabian-Nubian Shield | Bi'r Umq suture zone  | Qudayd           | metatonalite       | U-Pb   | 751 ± 5  | zircon  | SHRIMP  | intrusion age | SYN-OROGENIC            |             | 126    |
| 445 | 39.3950 | 22.6405 |           | Saudi Arabia | Arabian-Nubian Shield | Bi'r Umq suture zone  | Thrawah          | ophiolite (gabbro) | U-Pb   | 777 ± 17 | zircon  | SHRIMP  | intrusion age | PRE-OROGENIC            |             | 126    |
| 446 | 40.6581 | 22.4232 |           | Saudi Arabia | Arabian-Nubian Shield | Bi'r Umq suture zone  | Mahd group       | rhyolite           | U-Pb   | 777 ± 5  | zircon  | SHRIMP  | intrusion age | PRE-OROGENIC            |             | 126    |
| 447 | 40.6600 | 22.4335 |           | Saudi Arabia | Arabian-Nubian Shield | Bi'r Umq suture zone  | Ramram           | granodiorite       | U-Pb   | 769 ± 6  | zircon  | SHRIMP  | intrusion age | PRE-OROGENIC            |             | 126    |
| 448 | 40.6661 | 23.4578 |           | Saudi Arabia | Arabian-Nubian Shield | Bi'r Umq suture zone  | Ramram           | granite            | U-Pb   | 749 ± 10 | zircon  | SHRIMP  | intrusion age | PRE-OROGENIC            |             | 126    |
| 449 | 40.8162 | 23.4154 |           | Saudi Arabia | Arabian-Nubian Shield | Bi'r Umq suture zone  | Dhukhr           | tonalite           | U-Pb   | 803 ± 17 | zircon  | SHRIMP  | intrusion age | PRE-OROGENIC            |             | 126    |
| 450 | 40.9256 | 23.4770 |           | Saudi Arabia | Arabian-Nubian Shield | Bi'r Umq suture zone  | Bari             | granite            | U-Pb   | 776 ± 6  | zircon  | SHRIMP  | intrusion age | PRE-OROGENIC            |             | 126    |
| 451 | 40.0586 | 23.5031 |           | Saudi Arabia | Arabian-Nubian Shield | Bi'r Umq suture zone  | Hufayriyah       | tonalite           | U-Pb   | 785 ± 6  | zircon  | SHRIMP  | intrusion age | PRE-OROGENIC            |             | 126    |
| 452 | 39.8883 | 22.4122 |           | Saudi Arabia | Arabian-Nubian Shield | Bi'r Umq suture zone  | Kamil            | diorite            | U-Pb   | 772 ± 6  | zircon  | SHRIMP  | intrusion age | PRE-OROGENIC            |             | 126    |
| 453 | 39.3660 | 22.7056 |           | Saudi Arabia | Arabian-Nubian Shield | Bi'r Umq suture zone  | Bi'rak           | microgabbro        | U-Pb   | 854 ± 15 | zircon  | SHRIMP  | intrusion age | PRE-OROGENIC            |             | 126    |
| 454 | 39.3620 | 22.7050 |           | Saudi Arabia | Arabian-Nubian Shield | Bi'r Umq suture zone  | Bi'rak           | microgabbro        | U-Pb   | 812 ± 23 | zircon  | SHRIMP  | intrusion age | PRE-OROGENIC            |             | 126    |
| 455 | 39.3243 | 22.7768 |           | Saudi Arabia | Arabian-Nubian Shield | Bi'r Umq suture zone  | Hanak            | granite            | U-Pb   | 596 ± 10 | zircon  | SHRIMP  | intrusion age | POST-OROGENIC           |             | 126    |
| 456 | 41.3943 | 23.4450 |           | Saudi Arabia | Arabian-Nubian Shield | Bi'r Umq suture zone  | Dhukhr           | diorite            | U-Pb   | 813 ± 10 | zircon  | SHRIMP  | intrusion age | PRE-OROGENIC            |             | 126    |
| 457 | 36.5322 | 26.3724 |           | Saudi Arabia | Arabian-Nubian Shield | Arabian-Nubian Shield | Imdan complex    | granitoid          | U-Pb   | 676 ± 6  | zircon  | SHRIMP  | intrusion age | ARC                     | 84          | 127    |
| 458 | 37.0033 | 26.1030 |           | Saudi Arabia | Arabian-Nubian Shield | Arabian-Nubian Shield | Ash Shab granite | granite            | U-Pb   | 609 ± 4  | zircon  | SHRIMP  | intrusion age | OROGENIC                | 84          | 127    |

| NO  | LON     | LAT     | ORG.<br>* | COUNTRY         | TECTONIC<br>DIVISION      | UNIT                      | UNIT NAME      | ROCK                         | METHOD | AGE (Ma) | MINERAL | AGETYPE | MEANING       | TECTONIC<br>ENVIRONMENT | CROSRE<br>F | ORGREF |
|-----|---------|---------|-----------|-----------------|---------------------------|---------------------------|----------------|------------------------------|--------|----------|---------|---------|---------------|-------------------------|-------------|--------|
| 459 | 37.2260 | 26.0177 |           | Saudi<br>Arabia | Arabian-<br>Nubian Shield | Arabian-<br>Nubian Shield | Unassigned     | lamprophyre<br>dike          | U-Pb   | 573 ± 6  | zircon  | SHRIMP  | intrusion age | OROGENIC                | 84          | 127    |
| 460 | 37.2596 | 26.0155 |           | Saudi<br>Arabia | Arabian-<br>Nubian Shield | Arabian-<br>Nubian Shield | Unassigned     | foliated granite             | U-Pb   | 575 ± 10 | zircon  | SHRIMP  | intrusion age | OROGENIC                | 84          | 127    |
| 461 | 37.1608 | 26.4577 |           | Saudi<br>Arabia | Arabian-<br>Nubian Shield | Arabian-<br>Nubian Shield | Unassigned     | granite                      | U-Pb   | 626 ± 4  | zircon  | SHRIMP  | intrusion age | OROGENIC                | 84          | 127    |
| 462 | 39.8271 | 21.4253 |           | Saudi<br>Arabia | Arabian-<br>Nubian Shield | Arabian-<br>Nubian Shield | Makkah         | batholith<br>gabbro          | U-Pb   | 859 ± 1  | zircon  | SHRIMP  | intrusion age | ARC                     | 84          | 127    |
| 463 | 37.1510 | 26.1352 |           | Saudi<br>Arabia | Arabian-<br>Nubian Shield | Arabian-<br>Nubian Shield | Habd           | granite                      | U-Pb   | 609 ± 4  | zircon  | SHRIMP  | intrusion age | OROGENIC                | 84          | 127    |
| 464 | 44.1997 | 22.6641 |           | Saudi<br>Arabia | Arabian-<br>Nubian Shield | Arabian-<br>Nubian Shield | Kirsh          | granite gneiss               | U-Pb   | 647 ± 8  | zircon  | SHRIMP  | intrusion age | ARC                     | 84          | 127    |
| 465 | 40.1203 | 24.0056 |           | Saudi<br>Arabia | Arabian-<br>Nubian Shield | Arabian-<br>Nubian Shield | Urayfi fm.     | rhyolite                     | U-Pb   | 747 ± 2  | zircon  | SHRIMP  | intrusion age | ARC                     | 84          | 127    |
| 466 | 41.1287 | 27.0106 |           | Saudi<br>Arabia | Arabian-<br>Nubian Shield | Arabian-<br>Nubian Shield | Hadn formation | felsic volcanic              | U-Pb   | 614 ± 6  | zircon  | SHRIMP  | intrusion age | OROGENIC                | 84          | 127    |
| 467 | 43.3300 | 24.1021 |           | Saudi<br>Arabia | Arabian-<br>Nubian Shield | Arabian-<br>Nubian Shield | Jurdhawiyah    | andesite-<br>dacite          | U-Pb   | 594 ± 16 | zircon  | SHRIMP  | intrusion age | OROGENIC                | 84          | 127    |
| 468 | 43.2771 | 23.2449 |           | Saudi<br>Arabia | Arabian-<br>Nubian Shield | Arabian-<br>Nubian Shield | Sub-Murdama    | andesite                     | U-Pb   | 623 ± 6  | zircon  | SHRIMP  | intrusion age | OROGENIC                | 84          | 127    |
| 469 | 44.1997 | 22.6641 |           | Saudi<br>Arabia | Arabian-<br>Nubian Shield | Arabian-<br>Nubian Shield | Kirsh gneiss   | pegmatite                    | U-Pb   | 637 ± 2  | zircon  | SHRIMP  | intrusion age | ARC                     | 84          | 127    |
| 470 | 43.3834 | 24.6816 |           | Saudi<br>Arabia | Arabian-<br>Nubian Shield | Arabian-<br>Nubian Shield | Habariyah      | monzogranite<br>gneiss       | U-Pb   | 573 ± 8  | zircon  | SHRIMP  | intrusion age | OROGENIC                | 84          | 127    |
| 471 | 44.5699 | 23.2668 |           | Saudi<br>Arabia | Arabian-<br>Nubian Shield | Arabian-<br>Nubian Shield | Sabah          | granite                      | U-Pb   | 571 ± 9  | zircon  | SHRIMP  | intrusion age | OROGENIC                | 84          | 127    |
| 472 | 44.5696 | 23.2668 |           | Saudi<br>Arabia | Arabian-<br>Nubian Shield | Arabian-<br>Nubian Shield | Sabah          | granite                      | U-Pb   | 579 ± 3  | zircon  | SHRIMP  | intrusion age | OROGENIC                | 84          | 127    |
| 473 | 44.5232 | 23.3177 |           | Saudi<br>Arabia | Arabian-<br>Nubian Shield | Arabian-<br>Nubian Shield | Najirah        | granite                      | U-Pb   | 576 ± 6  | zircon  | SHRIMP  | intrusion age | OROGENIC                | 84          | 127    |
| 474 | 44.7149 | 23.5613 |           | Saudi<br>Arabia | Arabian-<br>Nubian Shield | Arabian-<br>Nubian Shield | Kurs           | granite                      | U-Pb   | 565 ± 2  | zircon  | SHRIMP  | intrusion age | OROGENIC                | 84          | 127    |
| 475 | 44.6593 | 23.9765 |           | Saudi<br>Arabia | Arabian-<br>Nubian Shield | Arabian-<br>Nubian Shield | Unnamed        | granite                      | U-Pb   | 575 ± 6  | zircon  | SHRIMP  | intrusion age | OROGENIC                | 84          | 127    |
| 476 | 38.0144 | 25.2611 |           | Saudi<br>Arabia | Arabian-<br>Nubian Shield | Arabian-<br>Nubian Shield | Fashghah fm.   | Rhyolite                     | U-Pb   | 708 ± 4  | zircon  | SHRIMP  | intrusion age | ARC                     | 84          | 127    |
| 477 | 42.0810 | 24.9166 |           | Saudi<br>Arabia | Arabian-<br>Nubian Shield | Arabian-<br>Nubian Shield | Ablahn fm.     | felsic volcanic              | U-Pb   | 630 ± 7  | zircon  | SHRIMP  | intrusion age | OROGENIC                | 84          | 127    |
| 478 | 44.5880 | 23.8220 |           | Saudi<br>Arabia | Arabian-<br>Nubian Shield | Arabian-<br>Nubian Shield | Unnamed        | granite                      | U-Pb   | 575 ± 6  | zircon  | SHRIMP  | intrusion age | OROGENIC                | 84          | 127    |
| 479 | 37.9581 | 25.4083 |           | Saudi<br>Arabia | Arabian-<br>Nubian Shield | Arabian-<br>Nubian Shield | Fara           | trondjemite/gr<br>anodiorite | U-Pb   | 713 ± 9  | zircon  | SHRIMP  | intrusion age | ARC                     | 84          | 127    |

| NO  | LON     | LAT     | ORG.<br>* | COUNTRY         | TECTONIC<br>DIVISION      | UNIT                      | UNIT NAME              | ROCK                    | METHOD | AGE (Ma) | MINERAL | AGETYPE | MEANING       | TECTONIC<br>ENVIRONMENT | CROSRE<br>F | ORGREF   |
|-----|---------|---------|-----------|-----------------|---------------------------|---------------------------|------------------------|-------------------------|--------|----------|---------|---------|---------------|-------------------------|-------------|----------|
| 480 | 38.6156 | 25.2086 |           | Saudi<br>Arabia | Arabian-<br>Nubian Shield | Arabian-<br>Nubian Shield | Siqam fm.              | rhyolite                | U-Pb   | 697 ± 7  | zircon  | SHRIMP  | intrusion age | ARC                     | 84          | 127, 128 |
| 481 | 40.1264 | 24.6764 |           | Saudi<br>Arabia | Arabian-<br>Nubian Shield | Arabian-<br>Nubian Shield | Urayfi fm.             | rhyolite                | U-Pb   | 736 ± 5  | zircon  | SHRIMP  | intrusion age | ARC                     | 84          | 127, 128 |
| 482 | 40.3745 | 25.0508 |           | Saudi<br>Arabia | Arabian-<br>Nubian Shield | Arabian-<br>Nubian Shield | An Nakhli              | gneiss/granite          | U-Pb   | 731 ± 8  | zircon  | SHRIMP  | intrusion age | ARC                     | 84          | 127, 128 |
| 483 | 41.3614 | 27.0058 |           | Saudi<br>Arabia | Arabian-<br>Nubian Shield | Arabian-<br>Nubian Shield | Hadn intrusion         | tonalite                | U-Pb   | 683 ± 10 | zircon  | SHRIMP  | intrusion age | ARC                     | 84          | 127, 128 |
| 484 | 37.5474 | 25.6864 |           | Saudi<br>Arabia | Arabian-<br>Nubian Shield | Arabian-<br>Nubian Shield | Hamadat                | gneiss/granodi<br>orite | U-Pb   | 670 ± 10 | zircon  | SHRIMP  | intrusion age | ARC                     | 84          | 127, 128 |
| 485 | 38.0144 | 25.2611 |           | Saudi<br>Arabia | Arabian-<br>Nubian Shield | Arabian-<br>Nubian Shield | Fashghah fm.           | rhyolite                | U-Pb   | 711 ± 10 | zircon  | SHRIMP  | intrusion age | ARC                     | 84          | 127, 128 |
| 486 | 43.3607 | 24.1466 |           | Saudi<br>Arabia | Arabian-<br>Nubian Shield | Arabian-<br>Nubian Shield | Jurdhawiyah            | andesite-<br>dacite     | U-Pb   | 612 ± 4  | zircon  | SHRIMP  | intrusion age | OROGENIC                | 84          | 127, 128 |
| 487 | 44.3313 | 22.5661 |           | Saudi<br>Arabia | Arabian-<br>Nubian Shield | Arabian-<br>Nubian Shield | Sub-Murdama            | rhyolite                | U-Pb   | 620 ± 4  | zircon  | SHRIMP  | intrusion age | OROGENIC                | 84          | 127, 128 |
| 488 | 44.2757 | 22.5844 |           | Saudi<br>Arabia | Arabian-<br>Nubian Shield | Arabian-<br>Nubian Shield | Sub-Mudama             | rhyolite                | U-Pb   | 607 ± 3  | zircon  | SHRIMP  | intrusion age | OROGENIC                | 84          | 127, 128 |
| 489 | 43.1344 | 23.6451 |           | Saudi<br>Arabia | Arabian-<br>Nubian Shield | Arabian-<br>Nubian Shield | Murdama dike           | rhyolite                | U-Pb   | 631 ± 4  | zircon  | SHRIMP  | intrusion age | OROGENIC                | 84          | 127, 128 |
| 490 | 45.0088 | 23.9752 |           | Saudi<br>Arabia | Arabian-<br>Nubian Shield | Ar Rayn<br>terrane        | Jabal al Ashqar        | granodiorite            | U-Pb   | 632 ± 5  | zircon  | SHRIMP  | intrusion age | ARC                     |             | 129      |
| 491 | 45.1722 | 24.0077 |           | Saudi<br>Arabia | Arabian-<br>Nubian Shield | Ar Rayn<br>terrane        | Jabal umm Sharzah      | trondhjemite            | U-Pb   | 689 ± 10 | zircon  | SHRIMP  | intrusion age | ARC                     |             | 129      |
| 492 | 45.4896 | 22.9994 |           | Saudi<br>Arabia | Arabian-<br>Nubian Shield | Ar Rayn<br>terrane        | SE of Jabal<br>Ruga'an | granite                 | U-Pb   | 617 ± 5  | zircon  | SHRIMP  | intrusion age | ARC                     |             | 129      |
| 493 | 45.0686 | 23.8688 |           | Saudi<br>Arabia | Arabian-<br>Nubian Shield | Ar Rayn<br>terrane        | Jabal ar Ramadiyah     | trondhjemite            | U-Pb   | 616 ± 7  | zircon  | SHRIMP  | intrusion age | ARC                     |             | 129      |
| 494 | 45.4620 | 23.2440 |           | Saudi<br>Arabia | Arabian-<br>Nubian Shield | Ar Rayn<br>terrane        | N of Wadi Ghurrah      | granite                 | U-Pb   | 583 ± 8  | zircon  | SHRIMP  | intrusion age | OROGENIC                |             | 129      |
| 495 | 45.5419 | 23.5696 |           | Saudi<br>Arabia | Arabian-<br>Nubian Shield | Ar Rayn<br>terrane        | Bitran pluton          | alkali granite          | U-Pb   | 581 ± 6  | zircon  | SHRIMP  | intrusion age | OROGENIC                |             | 129      |
| 496 | 43.2658 | 22.3034 |           | Saudi<br>Arabia | Arabian-<br>Nubian Shield | Ar Rayn<br>terrane        | Siham gp               | rhyodacite<br>porphyry  | U-Pb   | 685 ± 3  | zircon  | SHRIMP  | intrusion age | ARC                     |             | 129      |
| 497 | 43.2658 | 22.3034 |           | Saudi<br>Arabia | Arabian-<br>Nubian Shield | Ar Rayn<br>terrane        | Siham gp               | granodiorite            | U-Pb   | 704 ± 8  | zircon  | SHRIMP  | intrusion age | ARC                     |             | 129      |
| 498 | 43.2658 | 22.3034 |           | Saudi<br>Arabia | Arabian-<br>Nubian Shield | Ar Rayn<br>terrane        | Siham gp               | granodiorite            | U-Pb   | 710 ± 7  | zircon  | SHRIMP  | intrusion age | ARC                     |             | 129      |
| 499 | 43.2658 | 22.3034 |           | Saudi<br>Arabia | Arabian-<br>Nubian Shield | Ar Rayn<br>terrane        | Post-Siham             | granite                 | U-Pb   | 659 ± 7  | zircon  | SHRIMP  | intrusion age | OROGENIC                |             | 129      |
| 500 | 43.2658 | 22.3034 |           | Saudi<br>Arabia | Arabian-<br>Nubian Shield | Ar Rayn<br>terrane        | Post-Siham             | quartz<br>porphyry      | U-Pb   | 646 ± 11 | zircon  | SHRIMP  | intrusion age | OROGENIC                |             | 129      |

| NO  | LON     | LAT     | ORG.<br>* | COUNTRY | TECTONIC<br>DIVISION      | UNIT                       | UNIT NAME                   | ROCK                        | METHOD | AGE (Ma)    | MINERAL    | AGETYPE     | MEANING                | TECTONIC<br>ENVIRONMENT | CROSRE<br>F | ORGREF |
|-----|---------|---------|-----------|---------|---------------------------|----------------------------|-----------------------------|-----------------------------|--------|-------------|------------|-------------|------------------------|-------------------------|-------------|--------|
| 501 | 46.8600 | 14.0500 |           | Yemen   | Arabian-<br>Nubian Shield | Al-Mahfid<br>terrane       | Al-Mahfid terrane           | foliated<br>granitic-gneiss | U-Pb   | 868 ± 22    | zircon     | SHRIMP      | crystallization<br>age | ARC                     |             | 130    |
| 502 | 45.3450 | 14.2920 |           | Yemen   | Arabian-<br>Nubian Shield | Abas terrane               | Abas terrane                | granitic<br>orthogneiss     | U-Pb   | 765 ± 16    | zircon     | SHRIMP      | crystallization<br>age | ARC                     |             | 130    |
| 503 | 46.9100 | 14.0400 |           | Yemen   | Arabian-<br>Nubian Shield | Al-Mahfid<br>terrane       | Al-Mahfid terrane           | granite gneiss              | U-Pb   | 764 ± 7     | zircon     | SHRIMP      | crystallization<br>age | ARC                     |             | 130    |
| 504 | 46.9100 | 14.0500 |           | Yemen   | Arabian-<br>Nubian Shield | Al-Mahfid<br>terrane       | Al-Mahfid terrane           | granite gneiss              | U-Pb   | 759 ± 9     | zircon     | SHRIMP      | crystallization<br>age | ARC                     |             | 130    |
| 505 | 45.0300 | 14.3500 |           | Yemen   | Arabian-<br>Nubian Shield | Abas terrane               | Abas terrane                | foliated grey<br>gneiss     | U-Pb   | 754 ± 13    | zircon     | SHRIMP      | crystallization<br>age | ARC                     |             | 130    |
| 506 | 45.7900 | 13.8750 |           | Yemen   | Arabian-<br>Nubian Shield | Al-Bayda arc               | Al-Bayda arc                | basaltic<br>andesite dyke   | Ar-Ar  | 823 ± 13    | hornblende | plateau age | crystallization<br>age |                         |             | 130    |
| 507 | 45.8700 | 13.9500 |           | Yemen   | Arabian-<br>Nubian Shield | Al-Bayda arc               | Al-Bayda arc                | alkali granite              | Ar-Ar  | 614 ± 11    | hornblende | plateau age | crystallization<br>age | INTRA-PLATE             |             | 130    |
| 508 | 45.7650 | 13.8700 |           | Yemen   | Arabian-<br>Nubian Shield | Al-Bayda arc               | Al-Bayda arc                | host granitoid              | K-Ar   | 740 ± 22    | biotite    |             | crystallization<br>age | POST-<br>OROGENIC       |             | 130    |
| 509 | 32.9018 | 24.0501 |           | Egypt   | Arabian-<br>Nubian Shield | Aswan region               | Monumental                  | granite                     | U-Pb   | 606 ± 2     | zircon     | ID-TIMS     | crystallization<br>age | POST-<br>OROGENIC       |             | 131    |
| 510 | 32.9016 | 24.0515 |           | Egypt   | Arabian-<br>Nubian Shield | Aswan region               | Aswan                       | tonalite                    | U-Pb   | 605.5 ± 1.4 | zircon     | ID-TIMS     | crystallization<br>age | POST-<br>OROGENIC       |             | 131    |
| 511 | 32.9137 | 24.0493 |           | Egypt   | Arabian-<br>Nubian Shield | Aswan region               | Aswan                       | tonalitic gneiss            | U-Pb   | 638 ± 12    | zircon     | ID-TIMS     | crystallization<br>age | ARC                     |             | 131    |
| 512 | 32.9137 | 24.0493 |           | Egypt   | Arabian-<br>Nubian Shield | Aswan region               | Aswan                       | tonalitic gneiss            | U-Pb   | 622 ± 11    | zircon     | LA-ICP-MS   | crystallization<br>age | ARC                     |             | 131    |
| 513 | 32.9171 | 24.0479 |           | Egypt   | Arabian-<br>Nubian Shield | Aswan region               | High-Dam                    | granite                     | U-Pb   | 595 ± 11    | zircon     | LA-ICP-MS   | crystallization<br>age | POST-<br>OROGENIC       |             | 131    |
| 514 | 32.9018 | 24.0501 |           | Egypt   | Arabian-<br>Nubian Shield | Aswan region               | Monumental                  | granite                     | U-Pb   | 604 ± 15    | zircon     | LA-ICP-MS   | crystallization<br>age | POST-<br>OROGENIC       |             | 131    |
| 515 | 34.3263 | 28.2114 |           | Egypt   | Arabian-<br>Nubian Shield | Tarr<br>carbonatite        | Wadi Tarr<br>albitite/Sinai | albitite                    | U-Pb   | 605 ± 13    | zircon     | SIMS        | crystallization<br>age | RIFTING                 |             | 132    |
| 516 | 33.9907 | 28.5220 |           | Egypt   | Arabian-<br>Nubian Shield | Katherine ring-<br>complex | Moneiga                     | quartz-diorite              | U-Pb   | 844 ± 4     | zircon     | SIMS        | crystallization<br>age | RIFTING                 |             | 133    |
| 517 | 43.7500 | 9.9300  |           | Somalia | Arabian-<br>Nubian Shield | Somali<br>basement         | Mora complex                | leucogranite                | Pb-Pb  | 842 ± 4     | zircon     | evaporation | crystallization<br>age | POST-<br>OROGENIC       |             | 134    |
| 518 | 45.1200 | 10.1500 |           | Somalia | Arabian-<br>Nubian Shield | Somali<br>basement         | Gabbro-syenite belt         | gabbro-syenite              | Pb-Pb  | 814 ± 7     | zircon     | evaporation | crystallization<br>age | POST-<br>OROGENIC       |             | 134    |
| 519 | 45.1200 | 10.1500 |           | Somalia | Arabian-<br>Nubian Shield | Somali<br>basement         | Hudiso migmatite            | migmatite                   | Pb-Pb  | 808 ± 6     | zircon     | evaporation | crystallization<br>age | POST-<br>OROGENIC       |             | 134    |
| 520 | 45.1200 | 10.1500 |           | Somalia | Arabian-<br>Nubian Shield | Somali<br>basement         | Gabbro-syenite belt         | gabbro-syenite              | Pb-Pb  | 778 ± 8     | zircon     | evaporation | crystallization<br>age | POST-<br>OROGENIC       |             | 134    |
| 521 | 45.0800 | 10.1700 |           | Somalia | Arabian-<br>Nubian Shield | Somali<br>basement         | Qabi Bahar<br>complex       | granodioritic<br>gneiss     | Pb-Pb  | 761 ± 4     | zircon     | evaporation | crystallization<br>age | POST-<br>OROGENIC       |             | 134    |

| NO  | LON     | LAT     | ORG.<br>* | COUNTRY  | TECTONIC<br>DIVISION      | UNIT               | UNIT NAME         | ROCK                                | METHOD | AGE (Ma)  | MINERAL | AGETYPE     | MEANING                | TECTONIC<br>ENVIRONMENT | CROSRE<br>F | ORGREF |
|-----|---------|---------|-----------|----------|---------------------------|--------------------|-------------------|-------------------------------------|--------|-----------|---------|-------------|------------------------|-------------------------|-------------|--------|
| 522 | 44.0800 | 9.9200  |           | Somalia  | Arabian-<br>Nubian Shield | Somali<br>basement | Mora complex      | layered<br>granitoid<br>orthogneiss | Pb-Pb  | 718 ± 9   | zircon  | evaporation | crystallization<br>age | POST-<br>OROGENIC       |             | 134    |
| 523 | 35.8000 | 18.6700 |           | Sudan    | Arabian-<br>Nubian Shield | Nakasib suture     | Adaiaamet         | diorite                             | Pb-Pb  | 812 ± 10  | zircon  | evaporation | crystallization<br>age | ARC                     |             | 135    |
| 524 | 35.8000 | 18.6700 |           | Sudan    | Arabian-<br>Nubian Shield | Nakasib suture     | Adaiaamet         | diorite                             | Pb-Pb  | 810 ± 12  | zircon  | evaporation | crystallization<br>age | ARC                     |             | 135    |
| 525 | 35.8300 | 19.0500 |           | Sudan    | Arabian-<br>Nubian Shield | Nakasib suture     | Luggag pluton     | granodiorite                        | Pb-Pb  | 762 ± 23  | zircon  | evaporation | crystallization<br>age | LATE/POST-<br>OROGENIC  |             | 135    |
| 526 | 36.0000 | 19.3000 | cop       | Sudan    | Arabian-<br>Nubian Shield | Nakasib suture     | Wadi Agwampt      | N-S-striking<br>syenitic dykes      | Rb-Sr  | 523 ± 18  | WR      | isochrone   | crystallization<br>age | INTRA-PLATE             |             | 135    |
| 527 | 35.8000 | 21.4300 |           | Sudan    | Arabian-<br>Nubian Shield | Red sea Hill       | Red sea Hill      | granodiorite                        | Pb-Pb  | 762 ± 6   | zircon  | evaporation | crystallization<br>age | ARC                     | 84          | 136    |
| 528 | 34.4300 | 21.9000 |           | Sudan    | Arabian-<br>Nubian Shield | Red sea Hill       | Red sea Hill      | basalt/rhyolite                     | Pb-Pb  | 733 ± 13  | zircon  | evaporation | crystallization<br>age | ARC                     | 84          | 136    |
| 529 | 35.3500 | 22.2100 |           | Sudan    | Arabian-<br>Nubian Shield | Red sea Hill       | Ligr pluton       | granite gneiss                      | Pb-Pb  | 844 ± 10  | zircon  | evaporation | crystallization<br>age | ARC                     | 84          | 136    |
| 530 | 35.2300 | 22.2600 |           | Sudan    | Arabian-<br>Nubian Shield | Red sea Hill       | Shinai pluton     | quartz diorite                      | Pb-Pb  | 691 ± 5   | zircon  | evaporation | crystallization<br>age | SYN-OROGENIC            | 136         | 137    |
| 531 | 38.4800 | 16.5300 |           | Ethiopia | Arabian-<br>Nubian Shield | ER Nakfa           | Tsabra            | granodiorite                        | Pb-Pb  | 838 ± 1.4 | zircon  | evaporation | crystallization<br>age | ARC                     | 84          | 138    |
| 532 | 38.5100 | 16.5000 |           | Ethiopia | Arabian-<br>Nubian Shield | ER Nakfa           | Emba              | granite                             | Pb-Pb  | 631 ± 0.7 | zircon  | evaporation | crystallization<br>age | ARC                     | 84          | 138    |
| 533 | 38.4800 | 16.5300 |           | Ethiopia | Arabian-<br>Nubian Shield | ER Nakfa           | Wogret            | granite                             | Pb-Pb  | 622 ± 1   | zircon  | evaporation | crystallization<br>age | ARC                     | 84          | 138    |
| 534 | 39.0500 | 15.4000 |           | Ethiopia | Arabian-<br>Nubian Shield | ER Asmara<br>area  | Nesafit           | diorite                             | Pb-Pb  | 811 ± 0.2 | zircon  | evaporation | crystallization<br>age | ARC                     | 84          | 138    |
| 535 | 39.4000 | 5.0000  |           | Ethiopia | Arabian-<br>Nubian Shield | Awata              | Awata             | gneiss                              | Pb-Pb  | 884 ± 0.8 | zircon  | evaporation | crystallization<br>age | ARC                     | 84          | 139    |
| 536 | 39.0800 | 5.9200  |           | Ethiopia | Arabian-<br>Nubian Shield | Zembaba area       | Zembaba area      | granite                             | Pb-Pb  | 752 ± 0.6 | zircon  | evaporation | crystallization<br>age | ARC                     | 84          | 139    |
| 537 | 38.1700 | 4.8300  |           | Ethiopia | Arabian-<br>Nubian Shield | Yavello            | Yavello           | gneiss                              | Pb-Pb  | 716 ± 1.2 | zircon  | evaporation | crystallization<br>age | ARC                     | 84          | 139    |
| 538 | 39.0800 | 5.9200  |           | Ethiopia | Arabian-<br>Nubian Shield | Alghe              | Alghe             | gneiss                              | Pb-Pb  | 560 ± 0.9 | zircon  | evaporation | crystallization<br>age |                         | 84          | 139    |
| 539 | 41.0900 | 9.1800  |           | Ethiopia | Arabian-<br>Nubian Shield | Hirna region       | Hirna area gneiss | gneiss                              | Pb-Pb  | 844 ± 1.1 | zircon  | evaporation | crystallization<br>age | ARC                     | 84          | 139    |
| 540 | 41.0800 | 9.1800  |           | Ethiopia | Arabian-<br>Nubian Shield | Harrar             | Harrar            | biotite gneiss                      | Pb-Pb  | 649 ± 0.6 | zircon  | evaporation | crystallization<br>age |                         | 84          | 139    |
| 541 | 41.0800 | 9.1800  |           | Ethiopia | Arabian-<br>Nubian Shield | Hirna region       | Hirna area gneiss | gneiss                              | Pb-Pb  | 942 ± 9   | zircon  | evaporation | crystallization<br>age | ARC                     | 84          | 139    |

| NO  | LON     | LAT     | ORG.<br>* | COUNTRY | TECTONIC<br>DIVISION | UNIT                                        | UNIT NAME                             | ROCK                                      | METHOD | AGE (Ma) | MINERAL | AGETYPE   | MEANING                | TECTONIC<br>ENVIRONMENT | CROSRE<br>F | ORGREF |
|-----|---------|---------|-----------|---------|----------------------|---------------------------------------------|---------------------------------------|-------------------------------------------|--------|----------|---------|-----------|------------------------|-------------------------|-------------|--------|
| 542 | -6.3600 | 30.4050 | fm        | Morocco | Anti-Atlas<br>Orogen | Bou Azzer-El<br>Graara inlier               | Tichibanine Group                     | rhyolite                                  | U-Pb   | 767 ±7   | zircon  | SHRIMP    | crystallization<br>age | ARC                     |             | 140    |
| 543 | -6.5020 | 30.4660 | fm        | Morocco | Anti-Atlas<br>Orogen | Bou Azzer-El<br>Graara inlier               | Tichibanine Group                     | rhyolite                                  | U-Pb   | 761 ±7   | zircon  | SHRIMP    | crystallization<br>age | ARC                     |             | 140    |
| 544 | -6.9490 | 30.5220 | fm        | Morocco | Anti-Atlas<br>Orogen | Bou Azzer-El<br>Graara inlier               | Assif n'Bougmmane<br>gneissic complex | orthogneiss                               | U-Pb   | 755 ±9   | zircon  | SHRIMP    | crystallization<br>age | ARC                     |             | 140    |
| 545 | -6.6160 | 30.4340 | fm        | Morocco | Anti-Atlas<br>Orogen | Bou Azzer-El<br>Graara inlier               | Assif n'Bougmmane<br>gneissic complex | orthogneiss                               | U-Pb   | 745 ±5   | zircon  | SHRIMP    | crystallization<br>age | ARC                     |             | 140    |
| 546 | -6.6610 | 30.4470 | fm        | Morocco | Anti-Atlas<br>Orogen | Bou Azzer-El<br>Graara inlier               | Granitic intrusion                    | granite                                   | U-Pb   | 702 ±5   | zircon  | SHRIMP    | crystallization<br>age | ARC                     |             | 140    |
| 547 | -6.8000 | 30.5140 | fm        | Morocco | Anti-Atlas<br>Orogen | Bou Azzer-El<br>Graara inlier               | Granitic intrusion                    | granite                                   | U-Pb   | 695 ±7   | zircon  | SHRIMP    | crystallization<br>age | ARC                     |             | 140    |
| 548 | -6.5930 | 30.4760 | fm        | Morocco | Anti-Atlas<br>Orogen | Bou Azzer-El<br>Graara inlier               | Bou Azzer ophiolite                   | plagiogranite                             | U-Pb   | 658 ±8   | zircon  | SHRIMP    | crystallization<br>age | ARC                     |             | 140    |
| 549 | -6.9230 | 30.4920 | fm        | Morocco | Anti-Atlas<br>Orogen | Bou Azzer-El<br>Graara inlier               | Tiddiline Group                       | rhyolitic<br>welded tuff                  | U-Pb   | 606 ±4   | zircon  | SHRIMP    | crystallization<br>age | ARC                     |             | 140    |
| 550 | -6.6160 | 30.4350 | fm        | Morocco | Anti-Atlas<br>Orogen | Bou Azzer-El<br>Graara inlier               | Tiddiline Group                       | trachyte                                  | U-Pb   | 606 ±5   | zircon  | SHRIMP    | crystallization<br>age | ARC                     |             | 140    |
| 551 | -6.9190 | 30.4890 | fm        | Morocco | Anti-Atlas<br>Orogen | Bou Azzer-El<br>Graara inlier               | Ouarzazate Group                      | rhyolitic<br>welded tuff                  | U-Pb   | 567 ±5   | zircon  | SHRIMP    | crystallization<br>age | SYN-OROGENIC            |             | 140    |
| 552 | -6.7650 | 30.6370 | fm        | Morocco | Anti-Atlas<br>Orogen | Bou Azzer-El<br>Graara inlier               | Ouarzazate Group                      | rhyolitic<br>welded tuff                  | U-Pb   | 566 ± 4  | zircon  | SHRIMP    | crystallization<br>age | SYN-OROGENIC            |             | 140    |
| 553 | -6.5450 | 30.4890 | fm        | Morocco | Anti-Atlas<br>Orogen | Bou Azzer-El<br>Graara inlier               | Ediacaran<br>intrusions               | diorite                                   | U-Pb   | 625 ±8   | zircon  | ICPMS     | crystallization<br>age | ARC                     |             | 140    |
| 554 | -6.5540 | 30.3500 | fm        | Morocco | Anti-Atlas<br>Orogen | Bou Azzer-El<br>Graara inlier               | Ediacaran<br>intrusions               | quartz diorite                            | U-Pb   | 586 ± 15 | zircon  | ICPMS     | crystallization<br>age | ARC                     |             | 140    |
| 555 | -7.7960 | 30.4870 | fm        | Morocco | Anti-Atlas<br>Orogen | Sirwa inlier                                | Adrar-n-Takoucht<br>Formation         | rhyolitic crystal<br>tuff<br>(ignimbrite) | U-Pb   | 572 ± 5  | zircon  | SHRIMP II | crystallization<br>age | POST-<br>OROGENIC       |             | 141    |
| 556 | -7.7740 | 30.4870 | fm        | Morocco | Anti-Atlas<br>Orogen | Sirwa inlier                                | Tadoughast<br>Formation               | pyroclastic tuff                          | U-Pb   | 565 ± 6  | zircon  | SHRIMP II | crystallization<br>age | RIFTING                 |             | 141    |
| 557 | -7.8520 | 30.3280 | fm        | Morocco | Anti-Atlas<br>Orogen | Agadir Melloul<br>- Jbel Iguiguil<br>inlier | Tadoughast<br>Formation               | rhyolite                                  | U-Pb   | 564 ± 6  | zircon  | SHRIMP II | crystallization<br>age | RIFTING                 |             | 141    |
| 558 | -7.8350 | 30.3330 | fm        | Morocco | Anti-Atlas<br>Orogen | Agadir Melloul<br>- Jbel Iguiguil<br>inlier | Tadoughast<br>Formation               | gray welded<br>ignimbrites                | U-Pb   | 565 ± 5  | zircon  | SHRIMP II | crystallization<br>age | RIFTING                 |             | 141    |
| 559 | -7.7860 | 30.2970 | fm        | Morocco | Anti-Atlas<br>Orogen | Agadir Melloul<br>- Jbel Iguiguil<br>inlier | Anammur<br>Formation                  | dacite crystal<br>tuff                    | U-Pb   | 561 ± 6  | zircon  | SHRIMP II | crystallization<br>age | RIFTING                 |             | 141    |
| 560 | -7.8120 | 30.2340 | fm        | Morocco | Anti-Atlas<br>Orogen | Agadir Melloul<br>inlier                    | Adrar-n-Takoucht<br>Formation         | rhyolite                                  | U-Pb   | 570 ± 5  | zircon  | SHRIMP II | crystallization<br>age | POST-<br>OROGENIC       |             | 141    |
| 561 | -7.8100 | 30.2280 | fm        | Morocco | Anti-Atlas<br>Orogen | Agadir Melloul<br>- Jbel Iguiguil<br>inlier | Tadoughast<br>Formation               | andesitic flow                            | U-Pb   | 566 ± 6  | zircon  | SHRIMP II | crystallization<br>age | RIFTING                 |             | 141    |

| NO  | LON     | LAT     | ORG.* | COUNTRY | TECTONIC DIVISION            | UNIT                                  | UNIT NAME                     | ROCK                                     | METHOD | AGE (Ma)                  | MINERAL           | AGETYPE             | MEANING             | TECTONIC ENVIRONMENT | CROSREF | ORGREF |
|-----|---------|---------|-------|---------|------------------------------|---------------------------------------|-------------------------------|------------------------------------------|--------|---------------------------|-------------------|---------------------|---------------------|----------------------|---------|--------|
| 562 | -7.8110 | 30.2120 | fm    | Morocco | Anti-Atlas Orogen            | Agadir Melloul - Jbel Iguiguil inlier | Fajjoud Formation             | gray welded massive lapillituff          | U-Pb   | 556 ± 5                   | zircon            | SHRIMP II           | crystallization age | RIFTING              |         | 141    |
| 563 | -7.8860 | 30.2140 | fm    | Morocco | Anti-Atlas Orogen            | Agadir Melloul - Jbel Iguiguil inlier | Tadoughast Formation          | gray welded ignimbrites                  | U-Pb   | 567 ± 5                   | zircon            | SHRIMP II           | crystallization age | RIFTING              |         | 141    |
| 564 | 17.7500 | 22.1667 | fm    | Libya   | Central Saharan Ghost Craton | Tibesti massif                        | Tibesti granites              | two-mica granite                         | U-Pb   | 563.2 ± 1.9               | zircon            | ID-TIMS             | crystallization age | POST-OROGENIC        |         | 142    |
| 565 | 17.7700 | 22.1700 | fm    | Libya   | Central Saharan Ghost Craton | Tibesti massif                        | Tibesti granites              | hornblende granite                       | U-Pb   | 557.6 ± 2.1               | zircon            | ID-TIMS             | crystallization age | POST-OROGENIC        |         | 142    |
| 566 | 19.2167 | 23.3333 | cop   | Libya   | Central Saharan Ghost Craton | Super Tibestian magmatic series       | Kangara pluton                | granitoids                               | Rb-Sr  | 560±4                     | WR                | Isochrone           | crystallization age | ARC                  |         | 21     |
| 567 | 17.7420 | 22.2000 | cop   | Libya   | Central Saharan Ghost Craton | Central Tibesti Massif                | Wadi Yebigue                  | porphyritic granite                      | Rb-Sr  | 558± 5                    | WR                | Isochrone           | crystallization age | POST-OROGENIC        |         | 143    |
| 568 | 17.7000 | 22.1330 | cop   | Libya   | Central Saharan Ghost Craton | Central Tibesti Massif                | Wadi Yebigue                  | two-mica granite                         | Rb-Sr  | 548 ± 12                  | WR                | Isochrone           | crystallization age | POST-OROGENIC        |         | 143    |
| 569 | 0.7120  | 20.2160 | fm    | Mali    | Trans-Saharan belt           | Western Hoggar                        | Tilemsi magmatic arc          | metaquartz diorite                       | U-Pb   | 726 +7/-3                 | zircon            | ID-TIMS             | crystallization age | ARC                  |         | 144    |
| 570 | 0.6890  | 20.3480 | fm    | Mali    | Trans-Saharan belt           | Western Hoggar                        | Tilemsi magmatic arc          | plagiogranite leucosome                  | U-Pb   | 710 +6/-5                 | zircon            | ID-TIMS             | crystallization age | ARC                  |         | 144    |
| 571 | 0.9180  | 19.6660 | fm    | Mali    | Trans-Saharan belt           | Western Hoggar                        | Tilemsi magmatic arc          | premetamorphic granodiorite              | U-Pb   | 635± 5                    | zircon            | ID-TIMS             | crystallization age | ARC                  |         | 144    |
| 572 | 2.4830  | 21.0650 | fm    | Mali    | Trans-Saharan belt           | Western Hoggar                        | Tirek granodiorite            | granodiorite                             | Ar-Ar  | 613.3± 2.2                | biotite           | Plateau             | crystallization age | SYN-OROGENIC         |         | 145    |
| 573 | 2.4550  | 20.7610 | fm    | Algeria | Trans-Saharan belt           | Western Hoggar                        | The East In Ouzzal shear zone | ultramylonite                            | Ar-Ar  | 849.3 ± 7.9 to 749.0 ±3.2 | hornblende        | In situ spot fusion | crystallization age |                      |         | 145    |
| 574 | 2.4550  | 20.7610 | fm    | Algeria | Trans-Saharan belt           | Western Hoggar                        | The East In Ouzzal shear zone | ultramylonite                            | Ar-Ar  | 649.5±2.4 to 625.9 ±2.2   | ferrotschermakite | In situ spot fusion | metamorphism        | METAMORPHISM         |         | 145    |
| 575 | 2.4430  | 20.7930 | fm    | Algeria | Trans-Saharan belt           | Western Hoggar                        | The East In Ouzzal shear zone | banded mylonite sample                   | Ar-Ar  | 525 ± 5                   | biotite           | In situ spot fusion | metamorphism        | METAMORPHISM         |         | 145    |
| 576 | 2.4430  | 20.8020 | fm    | Algeria | High Atlas+C585              | Western Hoggar                        | The East In Ouzzal shear zone | metasomatized country granitoid          | Ar-Ar  | 611.0 ± 2.1               | muscovite         | stepwise            | metamorphism        | METAMORPHISM         |         | 145    |
| 577 | 2.4500  | 20.7980 | fm    | Algeria | Trans-Saharan belt           | Western Hoggar                        | The East In Ouzzal shear zone | hydrothermally altered country granitoid | Ar-Ar  | 576.2 ± 2.0               | muscovite         | stepwise            | metamorphism        | LATE-OROGENIC        |         | 145    |
| 578 | 2.1665  | 22.0361 | cop   | Algeria | In Ouzzal rigid terrane      | Tuareg shield                         | Tin Zebane dyke               | gabbros and granites                     | Rb-Sr  | 592.2± 5.8                | WR                | Isochrone           | emplacement         | FAULTING             |         | 146    |
| 579 | 1.7665  | 19.1695 | cop   | Mali    | Trans-Saharan belt           | Western Hoggar                        | Adrar des Iforas              | ultramylonite                            | Ar-Ar  | 535±6                     | K-feldspar        | Plateau             | metamorphism        | FAULTING             |         | 147    |

| NO  | LON     | LAT     | ORG.* | COUNTRY | TECTONIC DIVISION  | UNIT                       | UNIT NAME                                    | ROCK                           | METHOD | AGE (Ma)    | MINERAL                  | AGETYPE     | MEANING                              | TECTONIC ENVIRONMENT | CROSREF | ORGREF |
|-----|---------|---------|-------|---------|--------------------|----------------------------|----------------------------------------------|--------------------------------|--------|-------------|--------------------------|-------------|--------------------------------------|----------------------|---------|--------|
| 580 | 5.5000  | 21.6667 | cop   | Algeria | Tuareg shield      | Central Hoggar             | Laouni, Azrou-n-Fad, Tefedest, Egere-Aleksod | garnet amphibolite             | Sm-Nd  | 685± 19     | amphibole-plagioclase-WR | Isochrone   | metamorphism                         | METAMORPHISM         |         | 3      |
| 581 | 5.5000  | 21.6667 | cop   | Algeria | Tuareg shield      | Central Hoggar             | Laouni, Azrou-n-Fad, Tefedest, Egere-Aleksod | garnet amphibolite             | Sm-Nd  | 522 ± 27    | biotite-garnet-WR        | Isochrone   | metamorphism                         | METAMORPHISM         |         | 3      |
| 582 | 7.3333  | 25.0833 | cop   | Algeria | Tuareg shield      | Central Hoggar             | Ounane pluton                                | granitoid                      | Rb-Sr  | 615± 15     | WR                       | Isochrone   | emplacement                          | FAULTING             |         | 3      |
| 583 | 7.0000  | 25.0833 | cop   | Algeria | Tuareg shield      | Central Hoggar             | Tisselliline pluton                          | granitoid                      | Rb-Sr  | 555± 15     | WR                       | Isochrone   | emplacement                          | FAULTING             |         | 3      |
| 584 | 4.2378  | 21.7914 | cop   | Algeria | Tuareg shield      | Western Hoggar             | Tioueine pluton                              | quartz-syenite                 | U-Pb   | 523 ± 1     | zircon                   | ID-TIMS     | emplacement                          | FAULTING             |         | 148    |
| 585 | 4.2378  | 21.7914 | cop   | Algeria | Tuareg shield      | Western Hoggar             | Tioueine pluton                              | quartz-syenite                 | Pb-Pb  | 524 ± 14    | zircon                   | evaporation | emplacement                          | FAULTING             |         | 148    |
| 586 | -9.4808 | 30.6256 | cop   | Morocco | High Atlas         | Western High Atlas         | Tizgui dacite                                | dacite                         | U-Pb   | 532 ± 12    | zircon                   | ICPMS       | emplacement                          | INTRA-PLATE          |         | 149    |
| 587 | -7.1872 | 33.7250 |       | Morocco | Coastal Block      | Western Meseta             | Oued Rhebar Volcanic Complex                 | intermediate-mafic agglomerate | U-Pb   | 507 ± 5     | zircon                   | SHRIMP      | formation                            | RIFTING              |         | 150    |
| 588 | -8.5099 | 33.2649 | fm    | Morocco | Coastal Block      | El Jadida dome             | El Jadida rhyolite                           | rhyolite                       | U-Pb   | 584.2 ± 4.8 | zircon                   | SHRIMP      | formation                            | ARC                  |         | 151    |
| 589 | -8.5103 | 33.2652 | fm    | Morocco | Coastal Block      | El Jadida horst            | El Jadida rhyolite                           | rhyolite                       | U-Pb   | 605 ± 11    | zircon                   | SHRIMP      | formation                            | ARC                  |         | 151    |
| 590 | -8.5102 | 33.2663 | fm    | Morocco | Coastal Block      | El Jadida horst            | El Jadida rhyolite                           | rhyolite                       | U-Pb   | 586.5 ± 4.9 | zircon                   | SHRIMP      | formation                            | ARC                  |         | 151    |
| 591 | -8.5099 | 33.2657 | fm    | Morocco | Coastal Block      | El Jadida horst            | El Jadida rhyolite                           | rhyolite                       | U-Pb   | 577 ± 3.8   | zircon                   | SHRIMP      | formation                            | ARC                  |         | 151    |
| 592 | -8.5101 | 33.2664 | fm    | Morocco | Coastal Block      | El Jadida horst            | El Jadida rhyolite                           | rhyolitic ignimbrites          | U-Pb   | 577.2 ± 3.1 | zircon                   | SHRIMP      | formation                            | ARC                  |         | 151    |
| 593 | -8.5103 | 33.2657 | fm    | Morocco | Coastal Block      | El Jadida horst            | El Jadida rhyolite                           | rhyolitic ignimbrites          | U-Pb   | 580 ± 1.4   | zircon                   | SHRIMP      | formation                            | ARC                  |         | 151    |
| 594 | -8.1125 | 31.1133 | nc    | Morocco | Western High Atlas | Tighardine-Takoucht massif | Tiniskt                                      | microgranite                   | U-Pb   | 521 ± 5     | zircon                   | SHRIMP      | formation                            | RIFTING              |         | 152    |
| 595 | 2.1858  | 22.6412 | fl    | Algeria | Tuareg Shield      | Western Hoggar             | Tidéridjaouine                               | eclogite                       | U-Pb   | 623 ± 2     | zircon                   | LA-ICP-MS   | syn-collisional exhumation           | OROGENIC             |         | 5      |
| 596 | 0.7160  | 19.4700 | fm    | Mali    | Tuareg Shield      | Adrar des Iforas           | Tilemsi/Adjel'Hoc terrane                    | diorite                        | U-Pb   | 643 ± 4     | zircon                   | ICP-MS      | crystallization age                  | ARC                  |         | 153    |
| 597 | 0.8420  | 19.3780 | fm    | Mali    | Tuareg Shield      | Adrar des Iforas           | Tilemsi/Adjel'Hoc terrane                    | diatexite                      | U-Pb   | 626 ± 8     | zircon                   | ICP-MS      | crystallization age                  | OROGENIC             |         | 153    |
| 598 | 0.8420  | 19.9490 | fm    | Mali    | Tuareg Shield      | Adrar des Iforas           | Tilemsi/Adjel'Hoc terrane                    | sub-alkali orthogneiss         | U-Pb   | 716 ± 6     | zircon                   | ICP-MS      | crystallization of granite protolith | ARC                  |         | 153    |
| 599 | 1.5740  | 19.7700 | fm    | Mali    | Tuareg Shield      | Adrar des Iforas           | Kidal terrane                                | tonalite                       | U-Pb   | 604 ± 5     | zircon                   | ICP-MS      | crystallization                      | SYN-OROGENIC         |         | 153    |
| 600 | 0.9650  | 19.9060 | fm    | Mali    | Tuareg Shield      | Adrar des Iforas           | Kidal terrane                                | monzogranite                   | U-Pb   | 599 ± 4     | zircon                   | ICP-MS      | crystallization                      | POST-OROGENIC        |         | 153    |
| 601 | 1.2220  | 18.2460 | fm    | Mali    | Tuareg Shield      | Adrar des Iforas           | Kidal terrane                                | metadacite                     | U-Pb   | 623 ± 6     | zircon                   | ICP-MS      | crystallization of protolith         | ARC                  |         | 153    |



| NO  | LON     | LAT     | ORG.<br>* | COUNTRY | TECTONIC<br>DIVISION   | UNIT                      | UNIT NAME                      | ROCK                   | METHOD | AGE (Ma) | MINERAL | AGETYPE   | MEANING                                              | TECTONIC<br>ENVIRONMENT | CROSRE<br>F | ORGREF |
|-----|---------|---------|-----------|---------|------------------------|---------------------------|--------------------------------|------------------------|--------|----------|---------|-----------|------------------------------------------------------|-------------------------|-------------|--------|
| 602 | 2.0320  | 18.2040 | fm        | Mali    | Tuareg Shield          | Adrar des<br>Iforas       | Tamaradant<br>Domain           | metadiorite            | U-Pb   | 630 ± 6  | zircon  | ICP-MS    | crystallization<br>of protolith                      | ARC                     |             | 153    |
| 603 | 9.6860  | 24.3770 | fm        | Algeria | Eastern<br>Hoggar      | Djanet Terrane            | Djanet Batholith               | porphyritic<br>granite | U-Pb   | 571 ± 16 | zircon  | SHRIMP    | crystallization<br>age                               | ARC                     |             | 154    |
| 604 | 9.5690  | 24.4210 | fm        | Algeria | Eastern<br>Hoggar      | Djanet Terrane            | Tin Bedjane Pluton             | syenogranite           | U-Pb   | 568 ± 5  | zircon  | SHRIMP    | crystallization                                      | OROGENIC                |             | 154    |
| 605 | 9.7280  | 24.3820 | fm        | Algeria | Eastern<br>Hoggar      | Djanet Terrane            | Tin Amali Dyke<br>Swarm        | rhyolitic dyke         | U-Pb   | 558 ± 5  | zircon  | SHRIMP    | emplacement<br>age                                   | OROGENIC                |             | 154    |
| 606 | 9.7220  | 24.1760 | fm        | Algeria | Eastern<br>Hoggar      | Djanet Terrane            | Edembo Terrane                 | migmatite              | Pb-Pb  | 596 ± 10 | zircon  | SHRIMP    | maximum age<br>for the age of<br>the migmatitization | SUTURE                  |             | 154    |
| 607 | 9.7150  | 24.1870 | fm        | Algeria | Eastern<br>Hoggar      | Djanet Terrane            | Edembo Terrane                 | granitic<br>leucosome  | U-Pb   | 568 ± 4  | zircon  | SHRIMP    | formation of<br>the granitic<br>leucosome            | SUTURE                  |             | 154    |
| 608 | 15.4500 | 23.7667 | fl        | Libya   | Mid-Saharan<br>Craton  | Tibisti Massif            | Ben Ghnema<br>batholith        | granite                | K-Ar   | 555 ± 22 | biotite | isochrone | emplacement                                          | ARC                     |             | 155    |
| 609 | 15.4167 | 23.7667 | fl        | Libya   | Mid-Saharan<br>Craton  | Tibisti Massif            | Ben Ghnema<br>batholith        | adamellite             | K-Ar   | 552 ± 24 | biotite | isochrone | emplacement                                          | ARC                     |             | 155    |
| 610 | 15.4333 | 23.7500 | fl        | Libya   | Mid-Saharan<br>Craton  | Tibisti Massif            | Ben Ghnema<br>batholith        | adamellite             | K-Ar   | 552 ± 22 | biotite | isochrone | emplacement                                          | ARC                     |             | 155    |
| 611 | 15.3833 | 23.7500 | fl        | Libya   | Mid-Saharan<br>Craton  | Tibisti Massif            | Ben Ghnema<br>batholith        | granite                | K-Ar   | 549 ± 22 | biotite | isochrone | emplacement                                          | ARC                     |             | 155    |
| 612 | 15.4667 | 23.7167 | fl        | Libya   | Mid-Saharan<br>Craton  | Tibisti Massif            | Ben Ghnema<br>batholith        | granite                | K-Ar   | 586 ± 24 | biotite | isochrone | emplacement                                          | ARC                     |             | 155    |
| 613 | 15.4500 | 23.7167 | fl        | Libya   | Mid-Saharan<br>Craton  | Tibisti Massif            | Ben Ghnema<br>batholith        | granite                | K-Ar   | 586 ± 23 | biotite | isochrone | emplacement                                          | ARC                     |             | 155    |
| 614 | 15.4167 | 23.7167 | fl        | Libya   | Mid-Saharan<br>Craton  | Tibisti Massif            | Ben Ghnema<br>batholith        | adamellite             | K-Ar   | 586 ± 24 | biotite | isochrone | emplacement                                          | ARC                     |             | 155    |
| 615 | 15.4833 | 23.7667 | fl        | Libya   | Mid-Saharan<br>Craton  | Tibisti Massif            | Ben Ghnema<br>batholith        | granite                | K-Ar   | 559 ± 22 | WR      | isochrone | emplacement                                          | ARC                     |             | 155    |
| 616 | 25.4603 | 22.4250 | fl        | Egypt   | East Saharan<br>craton | Arabian–<br>Nubian Shield | Gebel Uweinat &<br>Gebel Kamil | diorite                | U-Pb   | 580 ± 3  | zircon  | LA-ICP-MS | crystallization<br>age                               | INTRA-PLATE             |             | 156    |
| 617 | 25.4614 | 22.4243 | fl        | Egypt   | East Saharan<br>craton | Arabian–<br>Nubian Shield | Gebel Uweinat &<br>Gebel Kamil | granite                | U-Pb   | 602 ± 2  | zircon  | LA-ICP-MS | crystallization<br>age                               | INTRA-PLATE             |             | 156    |
| 618 | 25.4191 | 22.4719 | fl        | Egypt   | East Saharan<br>craton | Arabian–<br>Nubian Shield | Gebel Uweinat &<br>Gebel Kamil | granite                | U-Pb   | 584 ± 4  | zircon  | LA-ICP-MS | crystallization<br>age                               | INTRA-PLATE             |             | 156    |
| 619 | 25.9725 | 22.1785 | fl        | Egypt   | East Saharan<br>craton | Arabian–<br>Nubian Shield | Gebel Uweinat &<br>Gebel Kamil | granite                | U-Pb   | 589 ± 2  | zircon  | LA-ICP-MS | crystallization<br>age                               | INTRA-PLATE             |             | 156    |
| 620 | 26.2444 | 22.1421 | fl        | Egypt   | East Saharan<br>craton | Arabian–<br>Nubian Shield | Gebel Uweinat &<br>Gebel Kamil | granite                | U-Pb   | 607 ± 2  | zircon  | LA-ICP-MS | crystallization<br>age                               | INTRA-PLATE             |             | 156    |
| 621 | 26.4077 | 22.2669 | fl        | Egypt   | East Saharan<br>craton | Arabian–<br>Nubian Shield | Gebel Uweinat &<br>Gebel Kamil | microgranite           | U-Pb   | 583 ± 2  | zircon  | LA-ICP-MS | crystallization<br>age                               | INTRA-PLATE             |             | 156    |

| NO  | LON     | LAT     | ORG.<br>* | COUNTRY         | TECTONIC<br>DIVISION   | UNIT                      | UNIT NAME                      | ROCK         | METHOD | AGE (Ma) | MINERAL | AGETYPE   | MEANING                | TECTONIC<br>ENVIRONMENT | CROSRE<br>F | ORGREF |
|-----|---------|---------|-----------|-----------------|------------------------|---------------------------|--------------------------------|--------------|--------|----------|---------|-----------|------------------------|-------------------------|-------------|--------|
| 622 | 26.4520 | 22.2121 | fl        | Egypt           | East Saharan<br>craton | Arabian–<br>Nubian Shield | Gebel Uweinat &<br>Gebel Kamil | monzonite    | U-Pb   | 599 ± 2  | zircon  | LA-ICP-MS | crystallization<br>age | INTRA-PLATE             |             | 156    |
| 623 | 26.6091 | 22.1915 | fl        | Egypt           | East Saharan<br>craton | Arabian–<br>Nubian Shield | Gebel Uweinat &<br>Gebel Kamil | granite      | U-Pb   | 597 ± 3  | zircon  | LA-ICP-MS | crystallization<br>age | INTRA-PLATE             |             | 156    |
| 624 | 28.9660 | 22.9783 | fl        | Egypt           | East Saharan<br>craton | Arabian–<br>Nubian Shield | Bir Safsaf                     | granite      | U-Pb   | 598 ± 5  | zircon  | LA-ICP-MS | crystallization<br>age | INTRA-PLATE             |             | 156    |
| 625 | 29.2996 | 23.1317 | fl        | Egypt           | East Saharan<br>craton | Arabian–<br>Nubian Shield | Bir Safsaf                     | granodiorite | U-Pb   | 585 ± 3  | zircon  | LA-ICP-MS | crystallization<br>age | INTRA-PLATE             |             | 156    |
| 626 | 29.2975 | 23.0918 | fl        | Egypt           | East Saharan<br>craton | Arabian–<br>Nubian Shield | Bir Safsaf                     | granite      | U-Pb   | 590 ± 2  | zircon  | LA-ICP-MS | crystallization<br>age | INTRA-PLATE             |             | 156    |
| 627 | 30.9510 | 22.5710 | fl        | Egypt           | East Saharan<br>craton | Arabian–<br>Nubian Shield | Gebel El Asr                   | granodiorite | U-Pb   | 628 ± 4  | zircon  | LA-ICP-MS | crystallization<br>age | INTRA-PLATE             |             | 156    |
| 628 | 30.9510 | 22.5710 | fl        | Egypt           | East Saharan<br>craton | Arabian–<br>Nubian Shield | Gebel El Asr                   | granite      | U-Pb   | 603 ± 4  | zircon  | LA-ICP-MS | crystallization<br>age | INTRA-PLATE             |             | 156    |
| 629 | 30.9510 | 22.5710 | fl        | Egypt           | East Saharan<br>craton | Arabian–<br>Nubian Shield | Gebel El Asr                   | granodiorite | U-Pb   | 605 ± 2  | zircon  | LA-ICP-MS | crystallization<br>age | INTRA-PLATE             |             | 156    |
| 630 | 30.9510 | 22.5710 | fl        | Egypt           | East Saharan<br>craton | Arabian–<br>Nubian Shield | Gebel El Asr                   | diorite      | U-Pb   | 599 ± 2  | zircon  | LA-ICP-MS | crystallization<br>age | INTRA-PLATE             |             | 156    |
| 631 | 31.7003 | 23.1585 | fl        | Egypt           | East Saharan<br>craton | Arabian–<br>Nubian Shield | Gebel Umm<br>Shaghir           | monzonite    | U-Pb   | 602 ± 3  | zircon  | LA-ICP-MS | crystallization<br>age | INTRA-PLATE             |             | 156    |
| 632 | 34.1833 | 25.3670 | fl        | Egypt           | East Saharan<br>craton | Wadi Mubarak<br>belt      | El Umra Granite                | granite      | U-Pb   | 690 ± 21 | zircon  | Isochron  | crystallization<br>age | SYN-OROGENIC            |             | 157    |
| 633 | 34.2360 | 25.3083 | fl        | Egypt           | East Saharan<br>craton | Wadi Mubarak<br>belt      | El Umra Granite                | granite      | U-Pb   | 654 ± 5  | zircon  | Isochron  | crystallization<br>age | SYN-OROGENIC            |             | 157    |
| 634 | 30.0000 | 20.0000 | cop       | Sudan           | East Saharan<br>craton | Arabian–<br>Nubian Shield | Nubian Desert red<br>granite   | granite      | Rb-Sr  | 565 ± 8  | WR      | Isochron  | crystallization<br>age | POST-<br>OROGENIC       |             | 158    |
| 635 | 29.3000 | 23.0000 | cop       | Egypt           | East Saharan<br>craton | Arabian–<br>Nubian Shield | Bir Safsaf<br>granodiorite     | granodiorite | Rb-Sr  | 564 ± 77 | WR      | Isochron  | crystallization<br>age | POST-<br>OROGENIC       |             | 158    |
| 636 | 29.0000 | 17.6000 | cop       | Sudan           | East Saharan<br>craton | Arabian–<br>Nubian Shield | Wadi Howar<br>microgranite     | microgranite | Rb-Sr  | 585 ± 19 | WR      | Isochron  | crystallization<br>age | POST-<br>OROGENIC       |             | 158    |
| 637 | 30.0000 | 20.0000 | cop       | Sudan           | East Saharan<br>craton | Arabian–<br>Nubian Shield | Nubian Desert<br>microgranite  | microgranite | Rb-Sr  | 623 ± 37 | WR      | Isochron  | crystallization<br>age | POST-<br>OROGENIC       |             | 158    |
| 638 | 26.3410 | 22.1300 | cop       | Egypt           | East Saharan<br>craton | Arabian–<br>Nubian Shield | Gebel Kamil<br>migmatite       | migmatite    | Rb-Sr  | 673 ± 56 | WR      | Isochron  | migmatization<br>age   | OROGENIC                |             | 158    |
| 639 | 29.0000 | 17.6000 | cop       | Sudan           | East Saharan<br>craton | Arabian–<br>Nubian Shield | Wadi Howar<br>migmatite        | migmatite    | Rb-Sr  | 686 ± 26 | WR      | Isochron  | migmatization<br>age   | OROGENIC                |             | 158    |
| 640 | 30.0000 | 20.0000 | cop       | Sudan           | East Saharan<br>craton | Arabian–<br>Nubian Shield | Nubian Desert<br>gneiss        | gneiss       | Rb-Sr  | 918 ± 40 | WR      | Isochron  | migmatization<br>age   | PRE-OROGENIC            |             | 158    |
| 641 | 36.9830 | 26.1360 | fm        | Saudi<br>Arabia | Arabian Shield         | Midyan terrane            | Imdan complex                  | gabbro       | U-Pb   | 747 ± 3  | zircon  | SHRIMP    | crystallization<br>age | ARC                     | 159         | 160    |
| 642 | 37.2770 | 25.8380 | fm        | Saudi<br>Arabia | Arabian Shield         | Midyan terrane            | Nabt complex                   | tonalite     | U-Pb   | 739 ± 4  | zircon  | SHRIMP    | crystallization<br>age | ARC                     | 159         | 160    |

| NO  | LON     | LAT     | ORG.<br>* | COUNTRY      | TECTONIC<br>DIVISION | UNIT           | UNIT NAME          | ROCK                             | METHOD | AGE (Ma) | MINERAL | AGETYPE   | MEANING             | TECTONIC<br>ENVIRONMENT | CROSRE<br>F | ORGREF |
|-----|---------|---------|-----------|--------------|----------------------|----------------|--------------------|----------------------------------|--------|----------|---------|-----------|---------------------|-------------------------|-------------|--------|
| 643 | 37.2770 | 25.8380 | fm        | Saudi Arabia | Arabian Shield       | Midyan terrane | Nabt complex       | diorite                          | U-Pb   | 737 ± 10 | zircon  | SHRIMP    | crystallization age | ARC                     | 159         | 160    |
| 644 | 37.3350 | 26.0500 | fm        | Saudi Arabia | Arabian Shield       | Midyan terrane | Bayda group        | felsic lava/sill?                | U-Pb   | 711 ± 12 | zircon  | SHRIMP    | crystallization age | ARC                     | 159         | 160    |
| 645 | 36.1350 | 26.7690 | fm        | Saudi Arabia | Arabian Shield       | Midyan terrane | Rhyolitic dike     | rhyolitic dike                   | U-Pb   | 687 ± 2  | zircon  | SHRIMP    | crystallization age | ARC                     | 159         | 160    |
| 646 | 36.0880 | 26.9230 | fm        | Saudi Arabia | Arabian Shield       | Midyan terrane | Buwaydah complex   | granodiorite                     | U-Pb   | 686 ± 4  | zircon  | SHRIMP    | crystallization age | ARC                     | 159         | 160    |
| 647 | 36.5450 | 26.3580 | fm        | Saudi Arabia | Arabian Shield       | Midyan terrane | Imdan complex      | granodiorite                     | U-Pb   | 676 ± 6  | zircon  | SHRIMP    | crystallization age | ARC                     | 159         | 161    |
| 648 | 36.3790 | 26.5060 | fm        | Saudi Arabia | Arabian Shield       | Midyan terrane | Liban complex      | monzogranite                     | U-Pb   | 635 ± 5  | zircon  | SHRIMP    | crystallization age | RIFTING                 | 159         | 160    |
| 649 | 36.1990 | 26.8540 | fm        | Saudi Arabia | Arabian Shield       | Midyan terrane | Kara Dakha complex | syenogranite                     | U-Pb   | 632 ± 4  | zircon  | SHRIMP    | crystallization age | RIFTING                 | 159         | 160    |
| 650 | 37.1640 | 26.4390 | fm        | Saudi Arabia | Arabian Shield       | Midyan terrane | Abu Suar complex   | syenogranite                     | U-Pb   | 626 ± 4  | zircon  | SHRIMP    | crystallization age | RIFTING                 | 159         | 161    |
| 651 | 37.1740 | 26.5840 | fm        | Saudi Arabia | Arabian Shield       | Midyan terrane | Ash Shab complex   | granite                          | U-Pb   | 609 ± 4  | zircon  | SHRIMP    | crystallization age | RIFTING                 | 159         | 161    |
| 652 | 37.1550 | 26.8020 | fm        | Saudi Arabia | Arabian Shield       | Midyan terrane | Hadb complex       | granite                          | U-Pb   | 609 ± 3  | zircon  | SHRIMP    | crystallization age | RIFTING                 | 159         | 161    |
| 653 | 37.2090 | 25.8210 | fm        | Saudi Arabia | Arabian Shield       | Midyan terrane | Nabt complex       | microgabbro                      | U-Pb   | 774 ± 14 | zircon  | SHRIMP    | crystallization age | ARC                     | 159         | 160    |
| 654 | 37.3220 | 25.9420 | fm        | Saudi Arabia | Arabian Shield       | Midyan terrane | Midyan terrane     | deformed granodiorite-tonalite   | U-Pb   | 668 ± 8  | zircon  | LA-ICP-MS | crystallization age | ARC                     | 159         | 163    |
| 655 | 37.3800 | 25.7350 | fm        | Saudi Arabia | Arabian Shield       | Midyan terrane | Midyan terrane     | deformed granodiorite-tonalite   | U-Pb   | 742 ± 5  | zircon  | LA-ICP-MS | crystallization age | ARC                     | 159         | 163    |
| 656 | 36.6850 | 26.7270 | fm        | Saudi Arabia | Arabian Shield       | Midyan terrane | Midyan terrane     | mylonitized granodiorite-granite | U-Pb   | 720 ± 3  | zircon  | SHRIMP    | crystallization age | ARC                     | 159         | 160    |
| 657 | 37.3300 | 25.4980 | fm        | Saudi Arabia | Arabian Shield       | Midyan terrane | Hanabiq            | metatonalite                     | U-Pb   | 714 ± 17 | zircon  | SHRIMP    | crystallization age | ARC                     | 159         | 160    |
| 658 | 37.0010 | 26.1010 | fm        | Saudi Arabia | Arabian Shield       | Midyan terrane | Midyan terrane     | orthogneiss                      | U-Pb   | 705 ± 4  | zircon  | SHRIMP    | crystallization age | ARC                     | 159         | 161    |
| 659 | 37.4200 | 25.8300 | fm        | Saudi Arabia | Arabian Shield       | Midyan terrane | Midyan terrane     | mylonitic orthogneiss            | U-Pb   | 701 ± 10 | zircon  | SHRIMP    | crystallization age | ARC                     | 159         | 160    |
| 660 | 37.0710 | 26.0690 | fm        | Saudi Arabia | Arabian Shield       | Midyan terrane | Midyan terrane     | diorite                          | U-Pb   | 696 ± 6  | zircon  | LA-ICP-MS | crystallization age | ARC                     | 159         | 163    |
| 661 | 36.7110 | 26.6560 | fm        | Saudi Arabia | Arabian Shield       | Midyan terrane | Midyan terrane     | granite gneiss                   | U-Pb   | 692 ± 4  | zircon  | SHRIMP    | crystallization age | ARC                     | 159         | 160    |

| NO  | LON     | LAT     | ORG.<br>* | COUNTRY      | TECTONIC<br>DIVISION  | UNIT                   | UNIT NAME               | ROCK                           | METHOD | AGE (Ma) | MINERAL    | AGETYPE   | MEANING             | TECTONIC<br>ENVIRONMENT | CROSRE<br>F | ORGREF  |
|-----|---------|---------|-----------|--------------|-----------------------|------------------------|-------------------------|--------------------------------|--------|----------|------------|-----------|---------------------|-------------------------|-------------|---------|
| 662 | 37.5000 | 25.8200 | fm        | Saudi Arabia | Arabian Shield        | Midyan terrane         | Hamadat                 | orthogneiss                    | U-Pb   | 688 ± 3  | zircon     | SHRIMP    | crystallization age | ARC                     | 159         | 162     |
| 663 | 37.0110 | 26.2160 | fm        | Saudi Arabia | Arabian Shield        | Midyan terrane         | Baladiyah               | orthogneiss                    | U-Pb   | 611 ± 8  | zircon     | SHRIMP    | crystallization age | RIFTING                 | 159         | 160     |
| 664 | 37.0990 | 26.0860 | fm        | Saudi Arabia | Arabian Shield        | Midyan terrane         | Midyan terrane          | mylonitic granite              | U-Pb   | 601 ± 3  | zircon     | LA-ICP-MS | crystallization age | RIFTING                 | 159         | 163     |
| 665 | 36.1060 | 27.0880 | fm        | Saudi Arabia | Arabian Shield        | Midyan terrane         | Midyan terrane          | mylonitic orthogneiss          | U-Pb   | 600 ± 4  | zircon     | SHRIMP    | crystallization age | RIFTING                 | 159         | 162     |
| 666 | 37.3530 | 25.6550 | fm        | Saudi Arabia | Arabian Shield        | Midyan terrane         | Midyan terrane          | mylonitic orthogneiss          | U-Pb   | 590 ± 3  | zircon     | SHRIMP    | crystallization age | RIFTING                 | 159         | 160     |
| 667 | 37.2920 | 25.9730 | fm        | Saudi Arabia | Arabian Shield        | Midyan terrane         | Midyan terrane          | mylonitic granite              | U-Pb   | 584 ± 3  | zircon     | LA-ICP-MS | crystallization age | RIFTING                 | 159         | 163     |
| 668 | 37.2450 | 26.0730 | fm        | Saudi Arabia | Arabian Shield        | Midyan terrane         | Midyan terrane          | undeformed granite             | U-Pb   | 581 ± 4  | zircon     | LA-ICP-MS | crystallization age | RIFTING                 | 159         | 163     |
| 669 | 37.2480 | 26.0020 | fm        | Saudi Arabia | Arabian Shield        | Midyan terrane         | Midyan terrane          | foliated granite               | U-Pb   | 575 ± 10 | zircon     | SHRIMP    | crystallization age | RIFTING                 | 159         | 161     |
| 670 | 37.2200 | 26.0050 | fm        | Saudi Arabia | Arabian Shield        | Midyan terrane         | Midyan terrane          | dike: lamprophyre?             | U-Pb   | 573 ± 5  | zircon     | SHRIMP    | crystallization age | RIFTING                 | 159         | 161     |
| 671 | 37.7230 | 25.6610 | fm        | Saudi Arabia | Arabian Shield        | Midyan terrane         | Hamadat                 | alkali-feldspar granite gneiss | U-Pb   | 569 ± 1  | zircon     | SHRIMP    | crystallization age | RIFTING                 | 159         | 162     |
| 672 | 37.4430 | 26.6650 | fm        | Saudi Arabia | Arabian Shield        | Midyan terrane         | Jibalah gp., Dhaika fm. | tuff                           | U-Pb   | 569 ± 3  | zircon     | LA-ICP-MS | crystallization age | RIFTING                 | 159         | 164,165 |
| 673 | 37.1367 | 26.4268 | fm        | Saudi Arabia | Arabian Shield        | Al Muwaylih Quadrangle | Bayda Group             | volcaniclastic                 | U-Pb   | 700–660  | zircon     | SHRIMP    | crystallization age | ARC                     | 166         | 161     |
| 674 | 33.3753 | 19.3767 | fm        | Sudan        | Arabian-Nubian Shield | Kerf Suture            | Abu Hamed Shear Zone    | deformed granite               | Ar-Ar  | 577 ± 2  | hornblende | plateau   | Sinistral transport | FAULTING                |             | 167     |
| 675 | 33.3753 | 19.3767 | fm        | Sudan        | Arabian-Nubian Shield | Kerf Suture            | Abu Hamed Shear Zone    | deformed granite               | Ar-Ar  | 577 ± 5  | biotite    | plateau   | Sinistral transport | FAULTING                |             | 167     |
| 676 | 33.7425 | 18.3228 | fm        | Sudan        | Arabian-Nubian Shield | Kerf Suture            | Nabati ring complex     | granite                        | Rb-Sr  | 573 ± 70 | WR         | isochrone | Sinistral transport | FAULTING                | 167         | 168     |
| 677 | 44.0617 | 18.2650 |           | Saudi Arabia | Arabian-Nubian Shield | Afif terrane           | J. Ashirah core         | monzo granite                  | U-Pb   | 637 ± 7  | zircon     | ID-TIMS   | crystallization age | POST-OROGENIC           |             | 169     |
| 678 | 43.1200 | 19.4667 |           | Saudi Arabia | Arabian-Nubian Shield | Nabitah erogenic belt  | Al Hassir rim           | K-feldspar granite             | U-Pb   | 628 ± 1  | zircon     | ID-TIMS   | crystallization age | POST-OROGENIC           |             | 169     |
| 679 | 43.7967 | 22.1983 |           | Saudi Arabia | Arabian-Nubian Shield | Afif terrane           | J. Dahul inner rim      | K-feldspar granite             | U-Pb   | 601 ± 1  | zircon     | ID-TIMS   | crystallization age | POST-OROGENIC           |             | 169     |
| 680 | 41.4367 | 27.3383 |           | Saudi Arabia | Arabian-Nubian Shield | Afif terrane           | J. Aja rim              | K-feldspar granite             | U-Pb   | 566 ± 1  | zircon     | ID-TIMS   | crystallization age | POST-OROGENIC           |             | 169     |
| 681 | 35.6417 | 27.9217 |           | Saudi Arabia | Arabian-Nubian Shield | Midyan terrane         | J. Dibbagh rim          | K-feldspar granite             | U-Pb   | 577 ± 13 | zircon     | ID-TIMS   | crystallization age | POST-OROGENIC           |             | 169     |

| NO  | LON     | LAT     | ORG.<br>* | COUNTRY         | TECTONIC<br>DIVISION      | UNIT              | UNIT NAME                        | ROCK                                | METHOD | AGE (Ma)    | MINERAL    | AGETYPE       | MEANING                 | TECTONIC<br>ENVIRONMENT | CROSRE<br>F | ORGREF |
|-----|---------|---------|-----------|-----------------|---------------------------|-------------------|----------------------------------|-------------------------------------|--------|-------------|------------|---------------|-------------------------|-------------------------|-------------|--------|
| 682 | 34.0394 | 25.9419 |           | Egypt           | Central<br>Eastern Desert | Karaim Basin      | Wadi Kareim                      | gabbro                              | U-Pb   | 730±22      | zircon     | SHRIMP-<br>RG | crystallization<br>age  | ARC                     |             | 170    |
| 683 | 34.0358 | 25.9442 |           | Egypt           | Central<br>Eastern Desert | Karaim Basin      | Wadi Kareim                      | diabase                             | U-Pb   | 743±45      | zircon     | SHRIMP-<br>RG | crystallization<br>age  | ARC                     |             | 170    |
| 684 | 34.0375 | 25.9478 |           | Egypt           | Central<br>Eastern Desert | Karaim Basin      | Wadi Kareim                      | felsic Tuff                         | U-Pb   | 769±29      | zircon     | SHRIMP-<br>RG | crystallization<br>age  | ARC                     |             | 170    |
| 685 | 43.5833 | 23.0000 |           | Saudi<br>Arabia | Arabian Shield            | Afif terrane      | Jabal Kirsh (Dome)               | biotite<br>paragneiss               | Ar-Ar  | 557±15      | biotite    | isochrone     | cooling age             | EXTENSION               |             | 171    |
| 686 | 44.6420 | 24.5390 | fm        | Saudi<br>Arabia | Arabian Shield            | Al-Amar<br>Suture | Ridayniyah<br>ophiolitic melange | sheared<br>amphibolite              | Ar-Ar  | 610 ±2      | hornblende | plateau       | cooling<br>(uplift) age | FAULTING                |             | 172    |
| 687 | 44.6750 | 24.3950 | fm        | Saudi<br>Arabia | Arabian Shield            | Al-Amar<br>Suture | Ridayniyah<br>ophiolitic melange | isotropic<br>metagabbros<br>(block) | Ar-Ar  | 612 ±3      | hornblende | plateau       | cooling<br>(uplift) age | FAULTING                |             | 172    |
| 688 | 44.6520 | 24.3240 | fm        | Saudi<br>Arabia | Arabian Shield            | Al-Amar<br>Suture | Ridayniyah<br>ophiolitic melange | isotropic<br>metagabbros<br>(block) | Ar-Ar  | 596 ±6      | hornblende | plateau       | cooling<br>(uplift) age | FAULTING                |             | 172    |
| 689 | 44.6520 | 24.2650 | fm        | Saudi<br>Arabia | Arabian Shield            | Al-Amar<br>Suture | Ridayniyah<br>ophiolitic melange | isotropic<br>metagabbros<br>(block) | Ar-Ar  | 611 ±8      | hornblende | plateau       | cooling<br>(uplift) age | FAULTING                |             | 172    |
| 690 | 35.8763 | 27.8553 |           | Saudi<br>Arabia | Arabian Shield            | Midyan<br>Terrane | Ghawjah<br>Metavolcanic          | Porphyritic<br>andesite             | U-Pb   | 763 ± 25    | zircon     | SIMS          | crystallization<br>age  | ARC                     |             | 173    |
| 691 | 35.8421 | 27.9645 |           | Saudi<br>Arabia | Arabian Shield            | Midyan<br>Terrane | Sawawin complex                  | coarse-grained<br>diorite           | U-Pb   | 661.5 ± 2.3 | zircon     | SIMS          | crystallization<br>age  | ?                       |             | 173    |
| 692 | 35.7947 | 27.9285 |           | Saudi<br>Arabia | Arabian Shield            | Midyan<br>Terrane | Sawawin complex                  | felsic sill                         | U-Pb   | 648 ± 17    | zircon     | SHRIMP-<br>RG | crystallization<br>age  | ?                       |             | 173    |
| 693 | 44.3470 | 23.4770 |           | Saudi<br>Arabia | Arabian Shield            | Al-Amar<br>Suture | Halaban Ophiolite                | metagabbro                          | Ar-Ar  | 679 ± 4     | hornblende | plateau       | cooling age             | METAMORPHISM            |             | 174    |
| 694 | 44.3180 | 23.4340 |           | Saudi<br>Arabia | Arabian Shield            | Al-Amar<br>Suture | Halaban Ophiolite                | metagabbro                          | Ar-Ar  | 679 ± 6     | hornblende | plateau       | cooling age             | METAMORPHISM            |             | 174    |
| 695 | 44.3530 | 23.4620 |           | Saudi<br>Arabia | Arabian Shield            | Al-Amar<br>Suture | Halaban Ophiolite                | hornblendite                        | Ar-Ar  | 681 ± 3     | hornblende | plateau       | cooling age             | METAMORPHISM            |             | 174    |
| 696 | 44.3340 | 23.3940 |           | Saudi<br>Arabia | Arabian Shield            | Al-Amar<br>Suture | Halaban Ophiolite                | amphibolite                         | Ar-Ar  | 679 ± 6     | hornblende | plateau       | cooling age             | METAMORPHISM            |             | 174    |
| 697 | 44.4040 | 23.2830 |           | Saudi<br>Arabia | Arabian Shield            | Al-Amar<br>Suture | Halaban Ophiolite                | amphibolite                         | Ar-Ar  | 597 ± 4     | hornblende | plateau       | cooling age             | METAMORPHISM            |             | 174    |
| 698 | 44.4450 | 23.4640 |           | Saudi<br>Arabia | Arabian Shield            | Al-Amar<br>Suture | Halaban Ophiolite                | garnet–biotite<br>schist            | Ar-Ar  | 597 ± 2     | Biotite    | plateau       | cooling age             | METAMORPHISM            |             | 174    |
| 699 | 44.4170 | 23.3920 |           | Saudi<br>Arabia | Arabian Shield            | Al-Amar<br>Suture | Halaban Ophiolite                | migmatite                           | Ar-Ar  | 601 ± 4     | hornblende | plateau       | cooling age             | METAMORPHISM            |             | 174    |
| 700 | 44.1820 | 23.6070 |           | Saudi<br>Arabia | Arabian Shield            | Al-Amar<br>Suture | Halaban Ophiolite                | quartz diorite                      | Ar-Ar  | 675 ± 4     | hornblende | plateau       | cooling age             | METAMORPHISM            |             | 174    |

| NO  | LON     | LAT     | ORG.* | COUNTRY      | TECTONIC DIVISION     | UNIT             | UNIT NAME                   | ROCK                          | METHOD | AGE (Ma)    | MINERAL    | AGETYPE   | MEANING             | TECTONIC ENVIRONMENT | CROSREF | ORGREF |
|-----|---------|---------|-------|--------------|-----------------------|------------------|-----------------------------|-------------------------------|--------|-------------|------------|-----------|---------------------|----------------------|---------|--------|
| 701 | 44.2230 | 23.6040 |       | Saudi Arabia | Arabian Shield        | Al-Amar Suture   | Halaban Ophiolite           | diorite                       | Ar-Ar  | 681 ± 5     | hornblende | plateau   | cooling age         | METAMORPHISM         |         | 174    |
| 702 | 42.0000 | 20.0000 | cop   | Saudi Arabia | Arabian Shield        | Jiddah Group     | Surgah Formation            | rhyolite                      | Rb-Sr  | 721 ± 55    | WR         | isochrone | crystallization age | ARC                  |         | 175    |
| 703 | 43.6933 | 20.7883 |       | Saudi Arabia | Arabian Shield        | Southern Najd    | Jabal Yafikh                | hornblende, tonalite gneiss   | U-Pb   | 666 ± 8     | zircon     | ID-TIMS   | crystallization age | ARC                  |         | 175    |
| 704 | 42.7933 | 20.0983 |       | Saudi Arabia | Arabian Shield        | Southern Najd    | Junaynah                    | granite                       | U-Pb   | 678 ± 10    | zircon     | ID-TIMS   | crystallization age | ARC                  |         | 176    |
| 705 | 42.0317 | 18.7317 |       | Saudi Arabia | Arabian Shield        | Asir             | Jabal Aya                   | granodiorite gneiss           | U-Pb   | 778 ± 9     | zircon     | ID-TIMS   | crystallization age | ARC                  |         | 176    |
| 706 | 42.0150 | 18.8183 |       | Saudi Arabia | Arabian Shield        | Asir             | Jabal Aya                   | biotite leuco-adamellite      | U-Pb   | 763 ± 4     | zircon     | ID-TIMS   | crystallization age | ARC                  |         | 176    |
| 707 | 41.9900 | 18.9367 |       | Saudi Arabia | Arabian Shield        | Tihamat Ash sham | Wadi Hali                   | biotite tonalite gneiss       | U-Pb   | 797 ± 15    | zircon     | ID-TIMS   | crystallization age | ARC                  |         | 176    |
| 708 | 43.0550 | 17.6950 |       | Saudi Arabia | Arabian Shield        | Asir             | Wadi Atf                    | tonalite gneiss               | U-Pb   | 663 ± 9     | zircon     | ID-TIMS   | crystallization age | ARC                  |         | 176    |
| 709 | 43.3083 | 18.2650 |       | Saudi Arabia | Arabian Shield        | Asir             | Wadi Tarib                  | adamellite                    | U-Pb   | 660 ± 7     | zircon     | ID-TIMS   | crystallization age | ARC                  |         | 176    |
| 710 | 43.7833 | 18.9833 |       | Saudi Arabia | Arabian Shield        | Asir             | Wadi Tarib                  | metagabbro                    | U-Pb   | 664 ± 12    | zircon     | ID-TIMS   | crystallization age | ARC                  |         | 176    |
| 711 | 43.3267 | 18.1117 |       | Saudi Arabia | Arabian Shield        | Asir             | Wadi Tarib                  | biotite granodiorite gneiss   | U-Pb   | 714 ± 28    | zircon     | ID-TIMS   | crystallization age | ARC                  |         | 176    |
| 712 | 42.2000 | 19.0502 |       | Saudi Arabia | Arabian Shield        | Asir             | Asir                        | biotite tonalite gneiss       | U-Pb   | 816 ± 4     | zircon     | ID-TIMS   | crystallization age | ARC                  |         | 176    |
| 713 | 34.9350 | 29.5870 |       | Israel       | Arabian-Nubian Shield | Elat area        | Shahmon Metabasite          | gabbro                        | Ar-Ar  | 616 ± 3     | amphibole  | plateau   | cooling (unroofing) | EXTENSION            |         | 177    |
| 714 | 34.9230 | 29.5140 |       | Israel       | Arabian-Nubian Shield | Elat area        | Elat Schists                | garnet-sillimanite metapelite | Ar-Ar  | 592 ± 4     | biotite    | plateau   | cooling (unroofing) | EXTENSION            |         | 177    |
| 715 | 34.9230 | 29.5140 |       | Israel       | Arabian-Nubian Shield | Elat area        | Elat Schists                | garnetiferous leucosome       | Ar-Ar  | 598.4 ± 1.4 | muscovite  | plateau   | cooling (unroofing) | EXTENSION            |         | 177    |
| 716 | 34.9080 | 29.4950 |       | Israel       | Arabian-Nubian Shield | Elat area        | Taba Tonalite               | tonalite gneiss               | Ar-Ar  | 601.4 ± 2   | biotite    | plateau   | cooling (unroofing) | EXTENSION            |         | 177    |
| 717 | 34.9380 | 29.5800 |       | Israel       | Arabian-Nubian Shield | Elat area        | Elat Granite Gneiss         | gneiss                        | Ar-Ar  | 607         | biotite    | plateau   | cooling (unroofing) | EXTENSION            |         | 177    |
| 718 | 34.9380 | 29.5690 |       | Israel       | Arabian-Nubian Shield | Elat area        | Elat Granite                | granite                       | Ar-Ar  | 597 ± 1.4   | biotite    | plateau   | cooling             | POST-OROGENIC        |         | 177    |
| 719 | 19.3740 | 22.9120 | cop   | Libya        | Arabian-Nubian Shield | Jabal Eghei Area | Addaba Mohamed Salah pluton | hornblende-biotite granite    | Rb-Sr  | 552 ± 3     | WR         | isochrone | crystallization age | POST-OROGENIC        |         | 178    |
| 720 | 19.3740 | 22.9120 | cop   | Libya        | Arabian-Nubian Shield | Jabal Eghei Area | Addaba Mohamed Salah pluton | hornblende-biotite granite    | Rb-Sr  | 547 ± 6     | WR         | isochrone | crystallization age | POST-OROGENIC        |         | 178    |

| NO  | LON     | LAT     | ORG.* | COUNTRY      | TECTONIC DIVISION     | UNIT                    | UNIT NAME                 | ROCK                            | METHOD | AGE (Ma) | MINERAL | AGETYPE   | MEANING             | TECTONIC ENVIRONMENT | CROSREF | ORGREF |
|-----|---------|---------|-------|--------------|-----------------------|-------------------------|---------------------------|---------------------------------|--------|----------|---------|-----------|---------------------|----------------------|---------|--------|
| 721 | 19.2230 | 22.9120 | cop   | Libya        | Arabian-Nubian Shield | Jabal Eghei Area        | Kangara pluton            | granite                         | Rb-Sr  | 554 ± 6  | WR      | isochrone | crystallization age | POST-OROGENIC        |         | 178    |
| 722 | 19.0930 | 23.2920 | cop   | Libya        | Arabian-Nubian Shield | Jabal Eghei Area        | Kangara-Tushidi pluton    | granite                         | Rb-Sr  | 528 ± 7  | WR      | isochrone | crystallization age | POST-OROGENIC        |         | 178    |
| 723 | 19.5680 | 23.3580 | cop   | Libya        | Arabian-Nubian Shield | Jabal Eghei Area        | Zouma Stock               | K-feldspar granite              | Rb-Sr  | 532 ± 7  | WR      | isochrone | crystallization age | POST-OROGENIC        | 178     | 179    |
| 724 | 19.2810 | 23.2520 | cop   | Libya        | Arabian-Nubian Shield | Jabal Eghei Area        | Kangara rhyolite          | rhyolite                        | Rb-Sr  | 530 ± 7  | WR      | isochrone | crystallization age | POST-OROGENIC        |         | 178    |
| 725 | 19.2810 | 23.2520 | cop   | Libya        | Arabian-Nubian Shield | Jabal Eghei Area        | Kangara rhyolite          | rhyolite                        | Rb-Sr  | 537 ± 7  | WR      | isochrone | crystallization age | POST-OROGENIC        |         | 178    |
| 726 | 19.2810 | 23.2520 | cop   | Libya        | Arabian-Nubian Shield | Jabal Eghei Area        | Kangara rhyolitic dike    | rhyolite                        | Rb-Sr  | 559 ± 35 | WR      | isochrone | crystallization age | POST-OROGENIC        |         | 178    |
| 727 | 19.2000 | 23.2700 | cop   | Libya        | Arabian-Nubian Shield | Jabal Eghei Area        | SB dike (K-T)             | silicified breccia (fault zone) | Rb-Sr  | 499 ± 7  | WR      | isochrone | crystallization age | FAULTING             |         | 178    |
| 728 | 26.4167 | 22.1667 | cop   | Egypt        | Arabian-Nubian Shield | Gebel Kamil Area        | Gebel Kamil               | migmatite                       | Rb-Sr  | 673 ± 56 | WR      | isochrone | metamorphism        | METAMORPHISM         |         | 180    |
| 729 | 41.3400 | 23.4967 |       | Saudi Arabia | Arabian-Nubian Shield | north Harrat Kishb      | Alse-Hairah pluton        | granitoid                       | Rb-Sr  | 567±86   | WR      | isochrone | crystallization age | POST-OROGENIC        |         | 181    |
| 730 | 41.5550 | 23.4933 |       | Saudi Arabia | Arabian-Nubian Shield | north Harrat Kishb      | Jabal Abu Aris quadrangle | tonalite gneiss                 | Rb-Sr  | 774±101  | WR      | isochrone | crystallization age | ARC                  |         | 181    |
| 731 | 42.6817 | 23.4467 |       | Saudi Arabia | Arabian-Nubian Shield | Numan quadrangle        | Al Bara batholith         | granite                         | Rb-Sr  | 571±19   | WR      | isochrone | crystallization age | POST-OROGENIC        |         | 181    |
| 732 | 42.8917 | 23.6083 |       | Saudi Arabia | Arabian-Nubian Shield | Afif area               | Afif quarangle            | granodiorite                    | Rb-Sr  | 718±25   | WR      | isochrone | crystallization age | ARC                  |         | 181    |
| 733 | 42.4300 | 23.9217 |       | Saudi Arabia | Arabian-Nubian Shield | Afif area               | Jabal al Usaybiyat        | syenogranite                    | Rb-Sr  | 602±9    | WR      | isochrone | crystallization age | POST-OROGENIC        |         | 181    |
| 734 | 43.1583 | 24.9017 |       | Saudi Arabia | Arabian-Nubian Shield | northwest Ad Dawadimi   | Jabal Tukhfah             | granite                         | Rb-Sr  | 563±71   | WR      | isochrone | crystallization age | POST-OROGENIC        |         | 181    |
| 735 | 43.8533 | 24.7950 |       | Saudi Arabia | Arabian-Nubian Shield | northwest Ad Dawadimi   | Jabal Jabalah             | granite                         | Rb-Sr  | 575±7    | WR      | isochrone | crystallization age | POST-OROGENIC        |         | 181    |
| 736 | 45.0700 | 24.0650 |       | Saudi Arabia | Arabian-Nubian Shield | Marjan area             | Northern pluton           | tonalite to quartz diorite      | Rb-Sr  | 604±61   | WR      | isochrone | crystallization age | POST-OROGENIC        |         | 181    |
| 737 | 45.1550 | 24.0133 |       | Saudi Arabia | Arabian-Nubian Shield | Marjan area             | Al Mizil pluton           | tonalite to trondhjemite        | Rb-Sr  | 509±157  | WR      | isochrone | crystallization age | POST-OROGENIC        |         | 181    |
| 738 | 40.0533 | 21.0217 |       | Saudi Arabia | Arabian-Nubian Shield | Wadi Sadiyah quadrangle | Bir ad Damm               | granite gneiss                  | Rb-Sr  | 542±23   | WR      | isochrone | crystallization age | POST-OROGENIC        |         | 181    |
| 739 | 41.1783 | 20.8150 |       | Saudi Arabia | Arabian-Nubian Shield | Wadi Shuqub quadrangle  | Wadi Dhurah               | tonalite                        | Rb-Sr  | 838±93   | WR      | isochrone | crystallization age | ARC                  |         | 181    |

| NO  | LON     | LAT     | ORG.<br>* | COUNTRY      | TECTONIC<br>DIVISION  | UNIT                   | UNIT NAME                             | ROCK              | METHOD | AGE (Ma)   | MINERAL    | AGETYPE                   | MEANING             | TECTONIC<br>ENVIRONMENT | CROSRE<br>F | ORGREF |
|-----|---------|---------|-----------|--------------|-----------------------|------------------------|---------------------------------------|-------------------|--------|------------|------------|---------------------------|---------------------|-------------------------|-------------|--------|
| 740 | 44.4517 | 22.7283 |           | Saudi Arabia | Arabian-Nubian Shield | south of Halaban       | Uyajibah                              | granite           | Rb-Sr  | 595±15     | WR         | isochrone                 | crystallization age | POST-OROGENIC           |             | 181    |
| 741 | 45.0700 | 24.0650 |           | Saudi Arabia | Arabian-Nubian Shield | Marjan area            | Northern pluton                       | tonalite          | K-Ar   | 600±4      | biotite    |                           | crystallization age | POST-OROGENIC           |             | 181    |
| 742 | 45.0700 | 24.0650 |           | Saudi Arabia | Arabian-Nubian Shield | Marjan area            | Northern pluton                       | tonalite          | K-Ar   | 601±5      | hornblende |                           | crystallization age | POST-OROGENIC           |             | 181    |
| 743 | 45.0700 | 24.0650 |           | Saudi Arabia | Arabian-Nubian Shield | Marjan area            | Northern pluton                       | Tonalite          | Ar-Ar  | 608±5      | hornblende | isochrone                 | crystallization age | POST-OROGENIC           |             | 181    |
| 744 | 36.1280 | 26.8150 | fm        | Saudi Arabia | Arabian-Nubian Shield | Midyan arc basement    | Zaam group                            | tonalite          | U-Pb   | 725±4      | zircon     | ID-TIMS (upper intercept) | crystallization age | ARC                     |             | 182    |
| 745 | 35.8110 | 27.3920 | fm        | Saudi Arabia | Arabian-Nubian Shield | Midyan arc basement    | Duba complex                          | diorite           | U-Pb   | 710±5      | zircon     | ID-TIMS (upper intercept) | crystallization age | ARC                     |             | 182    |
| 746 | 37.0310 | 26.1880 | fm        | Saudi Arabia | Arabian-Nubian Shield | Midyan arc basement    | Baladiyah complex                     | gneissic tonalite | U-Pb   | 676±4      | zircon     | ID-TIMS (upper intercept) | crystallization age | ARC                     |             | 182    |
| 747 | 36.3090 | 27.0150 | fm        | Saudi Arabia | Arabian-Nubian Shield | Midyan arc basement    | Qazaz complex                         | gneiss            | Rb-Sr  | 672±30     | WR         | isochrone                 | crystallization age | ARC                     |             | 182    |
| 748 | 36.8920 | 26.2220 | fm        | Saudi Arabia | Arabian-Nubian Shield | Midyan arc basement    | Baladiyah complex                     | granodiorite      | U-Pb   | 660±4      | zircon     | ID-TIMS (upper intercept) | crystallization age | ARC                     |             | 182    |
| 749 | 35.6950 | 27.6830 | fm        | Saudi Arabia | Arabian-Nubian Shield | Midyan arc basement    | Shar complex                          | alkali granite    | U-Pb   | 625±5      | zircon     | ID-TIMS (upper intercept) | crystallization age | POST-OROGENIC           |             | 182    |
| 750 | 36.4640 | 26.4550 | fm        | Saudi Arabia | Arabian-Nubian Shield | Midyan arc basement    | Liban complex                         | monzogranite      | U-Pb   | 621±7      | zircon     | ID-TIMS (upper intercept) | crystallization age | POST-OROGENIC           |             | 182    |
| 751 | 35.4320 | 27.9890 | fm        | Saudi Arabia | Arabian-Nubian Shield | Midyan arc basement    | Sadr complex                          | monzogranite      | U-Pb   | 599±5      | zircon     | ID-TIMS (upper intercept) | crystallization age | POST-OROGENIC           |             | 182    |
| 752 | 35.6350 | 27.9670 | fm        | Saudi Arabia | Arabian-Nubian Shield | Midyan arc basement    | Dabbagh complex                       | alkali granite    | U-Pb   | 577±4      | zircon     | ID-TIMS (upper intercept) | crystallization age | POST-OROGENIC           |             | 182    |
| 753 | 35.6950 | 27.6830 | fm        | Saudi Arabia | Arabian-Nubian Shield | Midyan arc basement    | Shar complex                          | alkali granite    | Rb-Sr  | 630±10     | WR         | isochrone                 | crystallization age | POST-OROGENIC           |             | 182    |
| 754 | 36.4640 | 26.4550 | fm        | Saudi Arabia | Arabian-Nubian Shield | Midyan arc basement    | Liban complex                         | monzogranite      | Rb-Sr  | 638±10     | WR         | isochrone                 | crystallization age | POST-OROGENIC           |             | 182    |
| 755 | 35.4320 | 27.9890 | fm        | Saudi Arabia | Arabian-Nubian Shield | Midyan arc basement    | Sadr complex                          | monzogranite      | Rb-Sr  | 598±30     | WR         | isochrone                 | crystallization age | POST-OROGENIC           |             | 182    |
| 756 | 35.6350 | 27.9670 | fm        | Saudi Arabia | Arabian-Nubian Shield | Midyan arc basement    | Dabbagh complex                       | alkali granite    | Rb-Sr  | 570±7      | WR         | isochrone                 | crystallization age | POST-OROGENIC           |             | 182    |
| 757 | 41.5682 | 25.6912 | cop       | Saudi Arabia | Arabian-Nubian Shield | basement of Jifn Basin | Murdamah Rhyolites                    | rhyolite          | U-Pb   | 624.9 ±4.2 | zircon     | ID-TIMS (upper intercept) | crystallization age | FAULTING                |             | 183    |
| 758 | 41.5741 | 25.5918 | cop       | Saudi Arabia | Arabian-Nubian Shield | Jifn Basin             | Jibalah Group cross-cutting volcanics | felsite dyke      | U-Pb   | 576.6 ±5.3 | zircon     | ID-TIMS (upper intercept) | crystallization age | FAULTING                |             | 183    |



| NO  | LON     | LAT     | ORG.* | COUNTRY      | TECTONIC DIVISION     | UNIT                        | UNIT NAME                           | ROCK                          | METHOD | AGE (Ma) | MINERAL      | AGETYPE                   | MEANING                 | TECTONIC ENVIRONMENT | CROSREF | ORGREF |
|-----|---------|---------|-------|--------------|-----------------------|-----------------------------|-------------------------------------|-------------------------------|--------|----------|--------------|---------------------------|-------------------------|----------------------|---------|--------|
| 759 | 36.1920 | 23.6110 | fm    | Egypt        | Arabian-Nubian Shield | Zabargad island             | Gneiss unit                         | felsic granulite              | Rb-Sr  | 655 ± 8  | gt-opx-pl-WR | isochrone                 | HP-HT metamorphic event | METAMORPHISM         |         | 184    |
| 760 | 36.1920 | 23.6110 | fm    | Egypt        | Arabian-Nubian Shield | Zabargad island             | Gneiss unit                         | felsic granulite              | Sm-Nd  | 699 ± 34 | gt-opx-WR    | isochrone                 | HP-HT metamorphic event | METAMORPHISM         |         | 184    |
| 761 | 41.1706 | 20.8196 | cop   | Saudi Arabia | Arabian-Nubian Shield | west-central Arabian Shield | Wadi Shuqub quadrangle              | tonalite-quartz diorite       | Rb-Sr  | 854 ± 10 | WR           | isochrone                 | crystallization age     | ARC                  |         | 185    |
| 762 | 41.2740 | 20.6564 | cop   | Saudi Arabia | Arabian-Nubian Shield | west-central Arabian Shield | Wadi Shuqub quadrangle              | diorite-tonalite stock        | Rb-Sr  | 815 ± 13 | WR           | isochrone                 | crystallization age     | ARC                  |         | 185    |
| 763 | 41.2245 | 20.7014 | cop   | Saudi Arabia | Arabian-Nubian Shield | west-central Arabian Shield | Gabalat area                        | biotite-granite               | Rb-Sr  | 552 ± 20 | WR           | isochrone                 | crystallization age     | POST-OROGENIC        |         | 185    |
| 764 | 39.5909 | 21.3321 | cop   | Saudi Arabia | Arabian-Nubian Shield | Jeddah-Makkah Region        | Bahrah Granodiorite-Granite Complex | granite-granodiorite          | Rb-Sr  | 665 ± 12 | WR           | isochrone                 | crystallization age     | ARC                  |         | 185    |
| 765 | 33.8362 | 17.8215 | cop   | Sudan        | Arabian-Nubian Shield | NE Bayuda Desert            | Abu Harik Complex                   | aplite, granite, granodiorite | Rb-Sr  | 898 ± 51 | WR           | isochrone                 | crystallization age     | ARC                  |         | 186    |
| 766 | 33.3407 | 19.3516 | cop   | Sudan        | Arabian-Nubian Shield | NE Bayuda Desert            | El Koro Volcanic Series             | volcaniclastic agglomerate    | Rb-Sr  | 800 ± 83 | WR           | isochrone                 | crystallization age     | ARC                  |         | 186    |
| 767 | 33.2904 | 19.4803 | cop   | Sudan        | Arabian-Nubian Shield | NE Bayuda Desert            | Diefallab Granite                   | biotite granites              | Rb-Sr  | 678 ± 43 | WR           | isochrone                 | crystallization age     | ARC                  |         | 186    |
| 768 | 33.0678 | 19.5118 | cop   | Sudan        | Arabian-Nubian Shield | NE Bayuda Desert            | Shallal Granite                     | biotite granites              | Rb-Sr  | 549 ± 12 | WR           | isochrone                 | crystallization age     | POST-OROGENIC        |         | 186    |
| 769 | 43.4930 | 17.9590 | fm    | Saudi Arabia | Arabian Shield        | Nabitah orogenic belt       | Talhah                              | tonalite gneiss               | U-Pb   | 732±3    | zircon       | ID-TIMS (upper intercept) | crystallization age     | ARC                  |         | 187    |
| 770 | 43.2430 | 18.0330 | fm    | Saudi Arabia | Arabian Shield        | Nabitah orogenic belt       | Suwaydah                            | tonalite gneiss               | U-Pb   | 729±3    | zircon       | ID-TIMS (upper intercept) | crystallization age     | ARC                  |         | 187    |
| 771 | 43.4500 | 18.3680 | fm    | Saudi Arabia | Arabian Shield        | Nabitah orogenic belt       | Wadi Arin                           | tonalite                      | U-Pb   | 674±6    | zircon       | ID-TIMS (upper intercept) | crystallization age     | ARC                  |         | 187    |
| 772 | 43.2430 | 18.7140 | fm    | Saudi Arabia | Arabian Shield        | Nabitah orogenic belt       | Mahda                               | two -mica granite             | U-Pb   | 670±6    | zircon       | ID-TIMS (upper intercept) | crystallization age     | ARC                  |         | 187    |
| 773 | 42.6540 | 18.2470 | fm    | Saudi Arabia | Arabian Shield        | Hijah-Asir belt             | Khamis Mushayt                      | quartz diorite                | U-Pb   | 667±4    | zircon       | ID-TIMS (upper intercept) | crystallization age     | SYN-OROGENIC         |         | 187    |
| 774 | 43.2500 | 18.2760 | fm    | Saudi Arabia | Arabian Shield        | Nabitah orogenic belt       | Hijrat                              | trondhjemite gneiss           | U-Pb   | 657±3    | zircon       | ID-TIMS (upper intercept) | crystallization age     | SYN-OROGENIC         |         | 187    |
| 775 | 42.8140 | 18.3000 | fm    | Saudi Arabia | Arabian Shield        | Hijah-Asir belt             | Khamis Mushayt                      | granodiorite gneiss           | U-Pb   | 654±7    | zircon       | ID-TIMS (upper intercept) | crystallization age     | SYN-OROGENIC         |         | 187    |
| 776 | 43.2240 | 18.3300 | fm    | Saudi Arabia | Arabian Shield        | Nabitah orogenic belt       | Al Ar                               | tonalite gneiss (?)           | U-Pb   | 644±3    | zircon       | ID-TIMS (upper intercept) | crystallization age     | SYN-OROGENIC         |         | 187    |
| 777 | 43.9870 | 18.4150 | fm    | Saudi Arabia | Arabian Shield        | Nabitah orogenic belt       | Wadi Makhdhul                       | quartz diorite                | U-Pb   | 642±5    | zircon       | ID-TIMS (upper intercept) | crystallization age     | SYN-OROGENIC         |         | 187    |

| NO  | LON     | LAT     | ORG.<br>* | COUNTRY      | TECTONIC<br>DIVISION | UNIT                  | UNIT NAME       | ROCK                   | METHOD | AGE (Ma)   | MINERAL | AGETYPE                   | MEANING             | TECTONIC<br>ENVIRONMENT | CROSRE<br>F | ORGREF |
|-----|---------|---------|-----------|--------------|----------------------|-----------------------|-----------------|------------------------|--------|------------|---------|---------------------------|---------------------|-------------------------|-------------|--------|
| 778 | 44.1140 | 18.0390 | fm        | Saudi Arabia | Arabian Shield       | Nabitah erogenic belt | Wadi Simlal     | quartz diorite         | U-Pb   | 641±2      | zircon  | ID-TIMS (upper intercept) | crystallization age | SYN-OROGENIC            |             | 187    |
| 779 | 43.6430 | 18.0220 | fm        | Saudi Arabia | Arabian Shield       | Nabitah erogenic belt | Jabal Tharwah   | biotite monzogranite   | U-Pb   | 641±10     | zircon  | ID-TIMS (upper intercept) | crystallization age | SYN-OROGENIC            |             | 187    |
| 780 | 44.4860 | 17.5900 | fm        | Saudi Arabia | Arabian Shield       | Nabitah erogenic belt | A'ashiba quartz | diorite gneiss         | U-Pb   | 640±3      | zircon  | ID-TIMS (upper intercept) | crystallization age | SYN-OROGENIC            |             | 187    |
| 781 | 43.0070 | 18.2450 | fm        | Saudi Arabia | Arabian Shield       | Nabitah erogenic belt | Tindahah        | biotite monzogranite   | U-Pb   | 635±15     | zircon  | ID-TIMS (upper intercept) | crystallization age | SYN-OROGENIC            |             | 187    |
| 782 | 43.0983 | 17.3215 |           | Saudi Arabia | Arabian Shield       | Nabitah Mobile Belt   | Tayyah Belt     | granitic dyke          | U-Pb   | 645.8 ±1.7 | zircon  | SIMS                      | crystallization age | SYN-OROGENIC            |             | 188    |
| 783 | 40.2625 | 22.3601 |           | Saudi Arabia | Arabian Shield       | Makkah Suite          | Asir            | gabbro/tonalite        | U-Pb   | 845.6±4.9  | zircon  | SIMS                      | crystallization age | ARC                     |             | 188    |
| 784 | 40.4546 | 22.4483 |           | Saudi Arabia | Arabian Shield       | Al Hawiyah Suite      | Asir            | granite                | U-Pb   | 591.9±5.2  | zircon  | SIMS                      | crystallization age | EXTENSION               |             | 188    |
| 785 | 42.7515 | 21.3362 |           | Saudi Arabia | Arabian Shield       | Kawr Suite            | Asir            | alkali granite         | U-Pb   | 611.7±6.5  | zircon  | SIMS                      | crystallization age | POST-OROGENIC           |             | 188    |
| 786 | 42.7515 | 21.3362 |           | Saudi Arabia | Arabian Shield       | Kawr Suite            | Asir            | alkali granite         | U-Pb   | 60±128     | zircon  | SIMS                      | crystallization age | POST-OROGENIC           |             | 188    |
| 787 | 42.8330 | 19.4527 |           | Saudi Arabia | Arabian Shield       | Wadbah Suite          | Asir            | alkali granite         | U-Pb   | 615.9±4.9  | zircon  | SIMS                      | crystallization age | POST-OROGENIC           |             | 188    |
| 788 | 42.9957 | 19.4872 |           | Saudi Arabia | Arabian Shield       | Ibn Hashbal Suite     | Asir            | alkali granite         | U-Pb   | 617.6±5.2  | zircon  | SIMS                      | crystallization age | POST-OROGENIC           |             | 188    |
| 789 | 44.3014 | 20.3945 |           | Saudi Arabia | Arabian Shield       | Al Hafoor Suite       | Tathlith        | alkali granite         | U-Pb   | 636±4      | zircon  | SIMS                      | crystallization age | POST-OROGENIC           |             | 188    |
| 790 | 43.8561 | 21.3037 |           | Saudi Arabia | Arabian Shield       | Haml Suite            | Afif            | quartz-monzonite       | U-Pb   | 608.6±8.1  | zircon  | SIMS                      | crystallization age | POST-OROGENIC           |             | 188    |
| 791 | 43.1950 | 23.8277 |           | Saudi Arabia | Arabian Shield       | Al Khushaymiyah Suite | Afif            | quartz-monzonite       | U-Pb   | 601.2±5.2  | zircon  | SIMS                      | crystallization age | POST-OROGENIC           |             | 188    |
| 792 | 44.3613 | 24.3788 |           | Saudi Arabia | Arabian Shield       | Ar Ruwaydah Suit      | Ad Dawadimi     | granite                | U-Pb   | 611±6.5    | zircon  | SIMS                      | crystallization age | POST-OROGENIC           |             | 188    |
| 793 | 44.6892 | 23.7289 |           | Saudi Arabia | Arabian Shield       | Najirah Granite       | Ad Dawadimi     | granite/alkali granite | U-Pb   | 607±7.9    | zircon  | SIMS                      | crystallization age | POST-OROGENIC           |             | 188    |
| 794 | 43.7863 | 25.1323 |           | Saudi Arabia | Arabian Shield       | Malik Granite         | Ad Dawadimi     | leucogranite           | U-Pb   | 599.4±5.1  | zircon  | SIMS                      | crystallization age | EXTENSION               |             | 188    |
| 795 | 41.2996 | 27.0623 |           | Saudi Arabia | Arabian Shield       | Idah Suite            | Ha'il           | alkali granite         | U-Pb   | 605.8±5.9  | zircon  | SIMS                      | crystallization age | POST-OROGENIC           |             | 188    |
| 796 | 35.3368 | 28.7423 |           | Saudi Arabia | Arabian Shield       | Al Bad Granite Suite  | Midyan          | alkali granite         | U-Pb   | 597.4±4.8  | zircon  | SIMS                      | crystallization age | EXTENSION               |             | 188    |
| 797 | 38.3566 | 24.4104 |           | Saudi Arabia | Arabian Shield       | Jar-Salajah Complex   | Hijaz           | granodiorite           | U-Pb   | 709.5±8.4  | zircon  | SIMS                      | crystallization age | ARC                     |             | 188    |

| NO  | LON     | LAT     | ORG.<br>* | COUNTRY      | TECTONIC<br>DIVISION | UNIT                | UNIT NAME | ROCK                       | METHOD | AGE (Ma)  | MINERAL   | AGETYPE   | MEANING             | TECTONIC<br>ENVIRONMENT | CROSRE<br>F | ORGREF |
|-----|---------|---------|-----------|--------------|----------------------|---------------------|-----------|----------------------------|--------|-----------|-----------|-----------|---------------------|-------------------------|-------------|--------|
| 798 | 38.4931 | 25.1915 |           | Saudi Arabia | Arabian Shield       | Mardabah Complex    | Hijaz     | syenite                    | U-Pb   | 525.6±4.7 | zircon    | SIMS      | crystallization age | POST-OROGENIC           |             | 188    |
| 799 | 38.4121 | 24.2981 |           | Saudi Arabia | Arabian Shield       | Admar Suite         | Hijaz     | syenite                    | U-Pb   | 599.2±3.8 | zircon    | SIMS      | crystallization age | EXTENSION               |             | 188    |
| 800 | 38.7527 | 23.7609 |           | Saudi Arabia | Arabian Shield       | Subh Suite          | Hijaz     | rhyolite                   | U-Pb   | 698.7±5.5 | zircon    | SIMS      | crystallization age | ARC                     |             | 188    |
| 801 | 38.7806 | 23.7452 |           | Saudi Arabia | Arabian Shield       | Shufayyah Comple    | Hijaz     | granodiorite/tonalite      | U-Pb   | 715.4±3.6 | zircon    | SIMS      | crystallization age | ARC                     |             | 188    |
| 802 | 21.2990 | 29.2810 | fm        | Libya        | Saharan              | Central Syrte Basin | ?         | rhyolitic volcanic breccia | K-Ar   | 470       | feldspar  | ?         | cooling age         | EXTENSION?              |             | 189    |
| 803 | 19.9390 | 28.4280 | fm        | Libya        | Saharan              | Central Syrte Basin | ?         | hornblende-biotite diorite | K-Ar   | 553       | pyroxene  | ?         | crystallization age | ARC?                    |             | 189    |
| 804 | 22.7070 | 29.5630 | fm        | Libya        | Saharan              | Central Syrte Basin | ?         | pink muscovite granite     | K-Ar   | 603       | muscovite | ?         | cooling age         | ARC?                    |             | 189    |
| 805 | 22.7070 | 29.5630 | fm        | Libya        | Saharan              | Central Syrte Basin | ?         | pink muscovite granite     | K-Ar   | 580       | muscovite | ?         | cooling age         | ARC?                    |             | 189    |
| 806 | 21.7340 | 27.5080 | fm        | Libya        | Saharan              | Central Syrte Basin | ?         | biotite granite            | K-Ar   | 558       | WR        | ?         | crystallization age | ?                       |             | 189    |
| 807 | 22.5650 | 27.6290 | fm        | Libya        | Saharan              | Central Syrte Basin | ?         | biotite granite            | K-Ar   | 557       | WR        | ?         | crystallization age | ?                       |             | 189    |
| 808 | 22.0060 | 28.3310 | fm        | Libya        | Saharan              | Central Syrte Basin | ?         | andesite                   | K-Ar   | 512       | WR        | ?         | crystallization age | ?                       |             | 189    |
| 809 | 18.9470 | 26.2820 | fm        | Libya        | Saharan              | Central Syrte Basin | ?         | granite                    | Rb-Sr  | 508       | biotite   | isochrone | crystallization age | ?                       |             | 189    |
| 810 | 21.6660 | 26.7390 | fm        | Libya        | Saharan              | Central Syrte Basin | ?         | quartz-biotite granulite   | K-Ar   | 535       | WR        | ?         | HT metamorphism?    | METAMORPHISM            |             | 189    |
| 811 | 23.7850 | 28.6450 | fm        | Libya        | Saharan              | Central Syrte Basin | ?         | trachyte                   | K-Ar   | 554       | WR        | ?         | crystallization age | ?                       |             | 189    |
| 812 | 21.1680 | 29.1100 | fm        | Libya        | Saharan              | Central Syrte Basin | ?         | granite                    | Rb-Sr  | 560       | WR        | isochrone | crystallization age | ?                       |             | 189    |
| 813 | 17.8210 | 29.4260 | fm        | Libya        | Saharan              | Central Syrte Basin | ?         | chlorite-sericite phyllite | Rb-Sr  | 550       | WR        | isochrone | crystallization age | ?                       |             | 189    |
| 814 | 19.3140 | 27.5850 | fm        | Libya        | Saharan              | Central Syrte Basin | ?         | granite                    | K-Ar   | 501       | biotite   | ?         | crystallization age | ?                       |             | 189    |
| 815 | 22.6460 | 29.0570 | fm        | Libya        | Saharan              | Central Syrte Basin | ?         | andesite, pink             | Rb-Sr  | 453       | WR        | isochrone | crystallization age | ?                       |             | 189    |
| 816 | 21.4430 | 29.1310 | fm        | Libya        | Saharan              | Central Syrte Basin | ?         | biotite granite            | K-Ar   | 508       | biotite   | ?         | crystallization age | ?                       |             | 189    |
| 817 | 20.6730 | 28.3840 | fm        | Libya        | Saharan              | Central Syrte Basin | ?         | granite                    | K-Ar   | 450       | WR        | ?         | crystallization age | ?                       |             | 189    |
| 818 | 21.5640 | 29.1480 | fm        | Libya        | Saharan              | Central Syrte Basin | ?         | granite                    | K-Ar   | 459       | biotite   | ?         | crystallization age | ?                       |             | 189    |

| NO  | LON     | LAT     | ORG.<br>* | COUNTRY  | TECTONIC<br>DIVISION  | UNIT                                   | UNIT NAME                         | ROCK                          | METHOD | AGE (Ma)  | MINERAL   | AGETYPE      | MEANING             | TECTONIC<br>ENVIRONMENT | CROSRE<br>F | ORGREF |
|-----|---------|---------|-----------|----------|-----------------------|----------------------------------------|-----------------------------------|-------------------------------|--------|-----------|-----------|--------------|---------------------|-------------------------|-------------|--------|
| 819 | 21.4010 | 28.4190 | fm        | Libya    | Saharan               | Central Syrte Basin                    | ?                                 | granite                       | K-Ar   | 490       | WR        | ?            | crystallization age | ?                       |             | 189    |
| 820 | 20.7940 | 27.6840 | fm        | Libya    | Saharan               | Central Syrte Basin                    | ?                                 | diorite                       | K-Ar   | 663       | WR        | ?            | crystallization age | ?                       |             | 189    |
| 821 | 21.5170 | 28.4380 | fm        | Libya    | Saharan               | Central Syrte Basin                    | ?                                 | diorite                       | K-Ar   | 500       | WR        | ?            | crystallization age | ?                       |             | 189    |
| 822 | 21.1280 | 29.3170 | fm        | Libya    | Saharan               | Central Syrte Basin                    | ?                                 | trachyte                      | Rb-Sr  | 487       | WR        | isochrone    | crystallization age | ?                       |             | 189    |
| 823 | 20.3500 | 28.0980 | fm        | Libya    | Saharan               | Central Syrte Basin                    | ?                                 | dacite-porohyry               | K-Ar   | 447       | feldspar  | ?            | crystallization age | ?                       |             | 189    |
| 824 | 13.9008 | 28.1392 | fm        | Libya    | Saharan               | Central Syrte Basin                    | ?                                 | muscovite granite             | Rb-Sr  | 595       | WR        | isochrone    | crystallization age | ?                       |             | 189    |
| 825 | 35.4540 | 8.9458  |           | Ethiopia | Arabian Nubian Shield | Didesa Domain                          | Ganjji granitoid                  | monzogranite                  | U-Pb   | 584 ± 10  | zircon    | SHIRIMP II   | crystallization age | RIFTING                 |             | 190    |
| 826 | 36.1551 | 9.0311  |           | Ethiopia | Arabian Nubian Shield | Didesa Domain                          | Didesa River                      | K-feldspar-rich granite       | U-Pb   | 653 ± 12  | zircon    | SHIRIMP II   | crystallization age | SC                      |             | 190    |
| 827 | 36.1551 | 9.0311  |           | Ethiopia | Arabian Nubian Shield | Didesa Domain                          | Didesa River                      | quartzo-feldspathic gneiss    | U-Pb   | 794 ± 30  | zircon    | SHIRIMP II   | crystallization age | PRC                     |             | 190    |
| 828 | 35.6250 | 9.1657  |           | Ethiopia | Arabian Nubian Shield | Didesa Domain                          | Ethiopian Road Authority Quarry   | hornblende + biotite tonalite | U-Pb   | 841 ± 8   | zircon    | SHIRIMP II   | crystallization age | PRC                     |             | 190    |
| 829 | 35.6250 | 9.1657  |           | Ethiopia | Arabian Nubian Shield | Didesa Domain                          | Ethiopian Road Authority Quarry   | felsic granite                | U-Pb   | 827 ± 17  | zircon    | SHIRIMP II   | crystallization age | PRC                     |             | 190    |
| 830 | 35.4390 | 9.1380  | fm        | Ethiopia | Arabian Nubian Shield | Didesa Domain                          | Gneiss and migmatites             | schist                        | Ar-Ar  | 551.6±2.2 | muscovite | total fusion | cooling age         | METAMORPHISM            |             | 191    |
| 831 | 38.6400 | 3.8270  | fm        | Ethiopia | Arabian-Nubian Shield | Moyale-Sololo granite-gneiss complex   | Metoarbasebat granite             | granite                       | U-Pb   | 526±5     | zircon    | SHIRIMP II   | crystallization age | POST-OROGENIC           |             | 192    |
| 832 | 38.7750 | 6.1000  | fm        | Ethiopia | Arabian-Nubian Shield | Adola granitogneiss complex            | Meleka granodiorite               | granodiorite                  | U-Pb   | 560±8     | zircon    | SHIRIMP II   | crystallization age | ARC                     |             | 192    |
| 833 | 38.6350 | 5.1940  | fm        | Ethiopia | Arabian-Nubian Shield | Megado ophiolitic fold and thrust belt | Digati diorite gneiss             | diorite gneiss                | U-Pb   | 570±7     | zircon    | SHIRIMP II   | crystallization age | ARC                     |             | 192    |
| 834 | 39.2920 | 5.9590  | fm        | Ethiopia | Arabian-Nubian Shield | Adola granitogneiss complex            | Wadera megacrystic diorite gneiss | diorite gneiss                | U-Pb   | 579±5     | zircon    | SHIRIMP II   | crystallization age | ARC                     |             | 192    |
| 835 | 39.3630 | 5.9640  | fm        | Ethiopia | Arabian-Nubian Shield | Adola granitogneiss complex            | Wadera deformed granite dyke      | granite dyke                  | U-Pb   | 576±7     | zircon    | SHIRIMP II   | crystallization age | ARC                     |             | 192    |

| NO  | LON     | LAT     | ORG.<br>* | COUNTRY  | TECTONIC<br>DIVISION      | UNIT                                         | UNIT NAME                                   | ROCK                                                     | METHOD | AGE (Ma)   | MINERAL                | AGETYPE       | MEANING                | TECTONIC<br>ENVIRONMENT | CROSRE<br>F | ORGREF |
|-----|---------|---------|-----------|----------|---------------------------|----------------------------------------------|---------------------------------------------|----------------------------------------------------------|--------|------------|------------------------|---------------|------------------------|-------------------------|-------------|--------|
| 836 | 39.1510 | 3.6330  | fm        | Ethiopia | Arabian–<br>Nubian Shield | Megado<br>ophiolitic fold<br>and thrust belt | Moyale granodiorite                         | granodiorite                                             | U-Pb   | 666±5      | zircon                 | SHIRIMP II    | crystallization<br>age | ARC                     |             | 192    |
| 837 | 39.2820 | 4.6750  | fm        | Ethiopia | Arabian–<br>Nubian Shield | Adola<br>granitegneiss<br>complex            | Melka Guba<br>megacrystic diorite<br>gneiss | diorite gneiss                                           | U-Pb   | 778 ±23    | zircon                 | SHIRIMP II    | crystallization<br>age | ARC                     |             | 192    |
| 838 | 39.4650 | 4.9170  | fm        | Ethiopia | Arabian–<br>Nubian Shield | Bulbul Belt                                  | Bulbul mylonitic<br>diorite                 | mylonitic<br>diorite                                     | U-Pb   | 876±7      | zircon                 | SHIRIMP II    | crystallization<br>age | ARC                     |             | 192    |
| 839 | 38.6400 | 3.8270  | fm        | Ethiopia | Arabian–<br>Nubian Shield | Moyale–Sololo<br>granite-gneiss<br>complex   | Metoarbasebat<br>granite                    | granite                                                  | Ar-Ar  | 511±4      | hornblende             | Laser probe   | cooling age            | METAMORPHISM            |             | 192    |
| 840 | 38.7750 | 6.1000  | fm        | Ethiopia | Arabian–<br>Nubian Shield | Adola<br>granitegneiss<br>complex            | Meleka granodiorite                         | granodiorite                                             | Ar-Ar  | 512±4      | biotite                | Laser probe   | cooling age            | METAMORPHISM            |             | 192    |
| 841 | 38.6350 | 5.1940  | fm        | Ethiopia | Arabian–<br>Nubian Shield | Megado<br>ophiolitic fold<br>and thrust belt | Digati diorite gneiss                       | diorite gneiss                                           | Ar-Ar  | 502±4      | biotite                | Laser probe   | cooling age            | METAMORPHISM            |             | 192    |
| 842 | 39.4650 | 4.9170  | fm        | Ethiopia | Arabian–<br>Nubian Shield | Bulbul Belt                                  | Bulbul mylonitic<br>diorite                 | mylonitic<br>diorite                                     | Ar-Ar  | 495±5      | biotite                | Laser probe   | cooling age            | METAMORPHISM            |             | 192    |
| 843 | 39.6182 | 13.9456 | fm        | Ethiopia | Arabian–<br>Nubian Shield | Tigrai                                       | Tsaliyet Group                              | sill                                                     | U-Pb   | 775.9±6.5  | zircon                 | SHIRIMP<br>RG | crystallization<br>age | OROGENIC                |             | 192    |
| 844 | 38.9686 | 14.0497 | fm        | Ethiopia | Arabian–<br>Nubian Shield | Tigrai                                       | Mai Kenetal granite                         | granit                                                   | U-Pb   | 612.3±5.7  | zircon                 | SHIRIMP<br>RG | crystallization<br>age | POST-<br>OROGENIC       |             | 193    |
| 845 | 39.4153 | 13.8902 | fm        | Ethiopia | Arabian–<br>Nubian Shield | Tigrai                                       | Tsaliyet Granitoid                          | aplite granite                                           | U-Pb   | 784.2±14.1 | zircon                 | SHIRIMP<br>RG | crystallization<br>age | OROGENIC                |             | 193    |
| 846 | 38.0630 | 14.7410 | fm        | Ethiopia | Arabian–<br>Nubian Shield | Axum area                                    | Azeho Granitoid                             | granitoid                                                | Sm-Nd  | 763 ±24    | WR                     | isochrone     | crystallization<br>age | SYN-OROGENIC            |             | 194    |
| 847 | 38.3610 | 14.3900 | fm        | Ethiopia | Arabian–<br>Nubian Shield | Axum area                                    | Deset Granitoid                             | granitoid                                                | U-Pb   | 757±30     | zircon                 | CHIME         | crystallization<br>age | SYN-OROGENIC            |             | 194    |
| 848 | 38.6490 | 14.2770 | fm        | Ethiopia | Arabian–<br>Nubian Shield | Axum area                                    | Chila Granitoid                             | granitoid                                                | U-Pb   | 806 ±21    | zircon                 | CHIME         | crystallization<br>age | SYN-OROGENIC            |             | 194    |
| 849 | 38.8060 | 14.3180 | fm        | Ethiopia | Arabian–<br>Nubian Shield | Axum area                                    | Rama Granitoid                              | granitoid                                                | Sm-Nd  | 793±51     | biotite-<br>hornblende | isochrone     | crystallization<br>age | SYN-OROGENIC            |             | 194    |
| 850 | 39.5900 | 15.3110 | fm        | Eritrea  | Arabian–<br>Nubian Shield | Eastern Eritrea                              | Ghedem domain<br>mylonites                  | mylonitised<br>titanite-bearing<br>amphibole<br>gneisses | Ar-Ar  | 586 ± 6    | hornblende             | plateau       | cooling age            | METAMORPHISM            |             | 195    |
| 851 | 39.5840 | 15.3220 | fm        | Eritrea  | Arabian–<br>Nubian Shield | Eastern Eritrea                              | Ghedem domain<br>mylonites                  | mylonitised<br>titanite-bearing<br>amphibole<br>gneisses | Ar-Ar  | 565 ± 7    | hornblende             | plateau       | cooling age            | METAMORPHISM            |             | 195    |

| NO  | LON     | LAT     | ORG.<br>* | COUNTRY  | TECTONIC<br>DIVISION      | UNIT                           | UNIT NAME                  | ROCK                                                     | METHOD | AGE (Ma)    | MINERAL    | AGETYPE                         | MEANING                | TECTONIC<br>ENVIRONMENT | CROSRE<br>F | ORGREF |
|-----|---------|---------|-----------|----------|---------------------------|--------------------------------|----------------------------|----------------------------------------------------------|--------|-------------|------------|---------------------------------|------------------------|-------------------------|-------------|--------|
| 852 | 39.5010 | 15.2880 | fm        | Eritrea  | Arabian–<br>Nubian Shield | Eastern Eritrea                | Ghedem domain<br>mylonites | mylonitised<br>titanite-bearing<br>amphibole<br>gneisses | Ar-Ar  | 572 ± 7     | hornblende | plateau                         | cooling age            | METAMORPHISM            |             | 195    |
| 853 | 39.5160 | 15.2840 | fm        | Eritrea  | Arabian–<br>Nubian Shield | Eastern Eritrea                | Ghedem domain<br>mylonites | mylonitised<br>titanite-bearing<br>amphibole<br>gneisses | Ar-Ar  | 579 ± 5     | hornblende | plateau                         | cooling age            | METAMORPHISM            |             | 195    |
| 854 | 39.3940 | 15.5100 | fm        | Eritrea  | Arabian–<br>Nubian Shield | Eastern Eritrea                | Ghedem domain<br>mylonites | mylonitised<br>quartzo-<br>feldspathic<br>gneisses       | Ar-Ar  | 563 ± 5     | muscovite  | plateau                         | cooling age            | METAMORPHISM            |             | 195    |
| 855 | 39.5750 | 15.3040 | fm        | Eritrea  | Arabian–<br>Nubian Shield | Eastern Eritrea                | Ghedem domain<br>mylonites | mylonitised<br>quartzo-<br>feldspathic<br>gneisses       | Ar-Ar  | 576 ± 6     | muscovite  | plateau                         | cooling age            | METAMORPHISM            |             | 195    |
| 856 | 39.4570 | 15.3230 | fm        | Eritrea  | Arabian–<br>Nubian Shield | Eastern Eritrea                | Ghedem domain<br>mylonites | mylonitised<br>titanite-bearing<br>amphibole<br>gneisses | Ar-Ar  | 594 ± 6     | hornblende | plateau                         | cooling age            | METAMORPHISM            |             | 195    |
| 857 | 39.4410 | 15.3870 | fm        | Eritrea  | Arabian–<br>Nubian Shield | Eastern Eritrea                | Ghedem domain<br>mylonites | mylonitised<br>titanite-bearing<br>amphibole<br>gneisses | Ar-Ar  | 583 ± 5     | hornblende | plateau                         | cooling age            | METAMORPHISM            |             | 195    |
| 858 | 39.4130 | 15.5120 | fm        | Eritrea  | Arabian–<br>Nubian Shield | Eastern Eritrea                | Ghedem domain<br>mylonites | mylonitised<br>titanite-bearing<br>amphibole<br>gneisses | Ar-Ar  | 572 ± 6     | hornblende | plateau                         | cooling age            | METAMORPHISM            |             | 195    |
| 859 | 36.3506 | 10.6036 |           | Ethiopia | Arabian–<br>Nubian Shield | Kilaj–<br>Wembara area         | Kilaj                      | metadolerite                                             | U-Pb   | 866±20      | zircon     | ID-TIMS<br>(upper<br>intercept) | crystallization<br>age | PRE-OROGENIC            |             | 196    |
| 860 | 34.9011 | 10.6822 |           | Ethiopia | Arabian–<br>Nubian Shield | Kilaj–<br>Wembara area         | Duksi                      | granitoid                                                | U-Pb   | 699±2       | zircon     | ID-TIMS<br>(upper<br>intercept) | crystallization<br>age | SYN-OROGENIC            |             | 196    |
| 861 | 35.9531 | 10.5208 |           | Ethiopia | Arabian–<br>Nubian Shield | Kilaj–<br>Wembara area         | Dogi                       | granitoid                                                | U-Pb   | 651±5       | zircon     | ID-TIMS<br>(upper<br>intercept) | crystallization<br>age | SYN-OROGENIC            |             | 196    |
| 862 | 34.7970 | 8.1710  | cop       | Ethiopia | Arabian–<br>Nubian Shield | Western<br>Ethiopian<br>Shield | Baro domain                | orthogneiss                                              | U-Pb   | 798± 12     | zircon     | ID-TIMS<br>(upper<br>intercept) | crystallization<br>age | ARC                     |             | 197    |
| 863 | 35.8990 | 9.2320  | cop       | Ethiopia | Arabian–<br>Nubian Shield | Western<br>Ethiopian<br>Shield | Geba domain                | orthogneiss                                              | U-Pb   | 811 +24/-25 | zircon     | ID-TIMS<br>(upper<br>intercept) | crystallization<br>age | ARC                     |             | 197    |
| 864 | 39.5440 | 13.9390 | fm        | Ethiopia | Arabian–<br>Nubian Shield | Northern<br>Ethiopia           | Negash pluton              | monzogranite                                             | U-Pb   | 608± 7      | zircon     | SIMS                            | crystallization<br>age | POST-<br>OROGENIC       |             | 198    |

| NO  | LON     | LAT     | ORG.<br>* | COUNTRY  | TECTONIC<br>DIVISION      | UNIT                           | UNIT NAME             | ROCK                          | METHOD | AGE (Ma)    | MINERAL   | AGETYPE                         | MEANING                           | TECTONIC<br>ENVIRONMENT | CROSRE<br>F | ORGREF |
|-----|---------|---------|-----------|----------|---------------------------|--------------------------------|-----------------------|-------------------------------|--------|-------------|-----------|---------------------------------|-----------------------------------|-------------------------|-------------|--------|
| 865 | 34.8167 | 8.1833  |           | Ethiopia | Arabian–<br>Nubian Shield | Western<br>Ethiopian<br>Shield | Baro granite          | granite                       | Rb-Sr  | 759 ± 18    | WR        | isochrone                       | crystallization<br>age            | SYN-OROGENIC            |             | 199    |
| 866 | 34.9333 | 8.1833  |           | Ethiopia | Arabian–<br>Nubian Shield | Western<br>Ethiopian<br>Shield | Birbir west           | quartz diorite                | U-Pb   | 828 +9/-2   | zircon    | ID-TIMS<br>(upper<br>intercept) | crystallization<br>age            | PRE-OROGENIC            |             | 199    |
| 867 | 35.0167 | 8.3333  |           | Ethiopia | Arabian–<br>Nubian Shield | Western<br>Ethiopian<br>Shield | Goma                  | granodiorite                  | U-Pb   | 814 ± 2     | zircon    | ID-TIMS<br>(upper<br>intercept) | crystallization<br>age            | PRE-OROGENIC            |             | 199    |
| 868 | 35.0333 | 8.4000  |           | Ethiopia | Arabian–<br>Nubian Shield | Western<br>Ethiopian<br>Shield | Mao                   | granite                       | U-Pb   | 541 +10/-16 | zircon    | ID-TIMS<br>(lower<br>intercept) | crystallization<br>age            | POST-<br>OROGENIC       |             | 199    |
| 869 | 34.9000 | 8.2167  |           | Ethiopia | Arabian–<br>Nubian Shield | Western<br>Ethiopian<br>Shield | Bonga                 | quartz<br>monzonite           | U-Pb   | 571 +11/—3  | zircon    | ID-TIMS<br>(upper<br>intercept) | crystallization<br>age            | POST-<br>OROGENIC       |             | 199    |
| 870 | 34.9333 | 8.1833  |           | Ethiopia | Arabian–<br>Nubian Shield | Western<br>Ethiopian<br>Shield | Birbir west           | quartz diorite                | Rb-Sr  | 632 ± 8     | WR        | isochrone                       | crystallization<br>age            | POST-<br>OROGENIC       |             | 199    |
| 871 | 35.0333 | 8.4000  |           | Ethiopia | Arabian–<br>Nubian Shield | Western<br>Ethiopian<br>Shield | Mao                   | granite                       | Rb-Sr  | 552 ± 41    | WR        | isochrone                       | crystallization<br>age            | POST-<br>OROGENIC       |             | 199    |
| 872 | 34.9000 | 8.2167  |           | Ethiopia | Arabian–<br>Nubian Shield | Western<br>Ethiopian<br>Shield | Bonga                 | quartz<br>monzonite           | Rb-Sr  | 540 ± 10    | WR        | isochrone                       | crystallization<br>age            | POST-<br>OROGENIC       |             | 199    |
| 873 | 39.1042 | 14.2743 |           | Ethiopia | Arabian–<br>Nubian Shield | Northern<br>Ethiopia           | Aksum–Adigrat<br>road | red granite                   | Ar-Ar  | 600.3±10.7  | biotite   | plateau                         | cooling age<br>(magmatism)        | OROGENIC                |             | 199    |
| 874 | 39.5530 | 13.8830 | fm        | Ethiopia | Arabian–<br>Nubian Shield | Northern<br>Ethiopia           | South Adigrat         | red granite                   | Ar-Ar  | 663.7±14.0  | biotite   | plateau                         | cooling age<br>(magmatism)        | OROGENIC                |             | 200    |
| 875 | 39.5530 | 13.8830 | fm        | Ethiopia | Arabian–<br>Nubian Shield | Northern<br>Ethiopia           | South Adigrat         | tonalite                      | Ar-Ar  | 665.8±13.0  | biotite   | plateau                         | cooling age<br>(magmatism)        | OROGENIC                |             | 200    |
| 876 | 39.5530 | 13.8830 | fm        | Ethiopia | Arabian–<br>Nubian Shield | Northern<br>Ethiopia           | South Adigrat         | tonalite                      | Ar-Ar  | 647.2±13.0  | biotite   | plateau                         | cooling age<br>(magmatism)        | OROGENIC                |             | 200    |
| 877 | 38.8101 | 14.3434 |           | Ethiopia | Arabian–<br>Nubian Shield | Western<br>Ethiopian           | North Aksum           | metagranodiori<br>te          | Ar-Ar  | 736.6±12.8  | biotite   | plateau                         | cooling age<br>(metamorphi<br>sm) | METAMORPHISM            |             | 200    |
| 878 | 36.6550 | 10.0000 | fm        | Ethiopia | Arabian–<br>Nubian Shield | Western<br>Ethiopian           | West Debre Markos     | leucogranite                  | Ar-Ar  | 594.0±10.7  | muscovite | plateau                         | cooling age<br>(magmatism)        | OROGENIC                |             | 200    |
| 879 | 36.4980 | 9.1010  | fm        | Ethiopia | Arabian–<br>Nubian Shield | Western<br>Ethiopian           | North Nekemte         | augen gneiss                  | Ar-Ar  | 564.5±10.2  | biotite   | plateau                         | cooling age<br>(metamorphi<br>sm) | METAMORPHISM            |             | 200    |
| 880 | 39.1960 | 5.9140  | fm        | Ethiopia | Arabian–<br>Nubian Shield | Western<br>Ethiopian           | Dodola                | red granite                   | Ar-Ar  | 518.3±11.5  | muscovite | plateau                         | cooling age<br>(magmatism)        | OROGENIC                |             | 200    |
| 881 | 39.1480 | 4.7800  | fm        | Ethiopia | Arabian–<br>Nubian Shield | Western<br>Ethiopian           | Dodola                | granite                       | Ar-Ar  | 542.3±11.9  | muscovite | plateau                         | cooling age<br>(magmatism)        | OROGENIC                |             | 200    |
| 882 | 39.9667 | 4.1500  |           | Ethiopia | Arabian–<br>Nubian Shield | Western<br>Ethiopian           | El Der                | hornblende-<br>biotite gneiss | K-Ar   | 739 ±14     | biotite   |                                 | cooling age<br>(metamorphi<br>sm) | METAMORPHISM            |             | 201    |
| 883 | 39.9667 | 4.1500  |           | Ethiopia | Arabian–<br>Nubian Shield | Western<br>Ethiopian           | El Der                | Amphibolite                   | K-Ar   | 637 ± 20    | WR        |                                 | crystallization<br>age            | OROGENIC                |             | 201    |
| 884 | 39.0500 | 3.5333  |           | Ethiopia | Arabian–<br>Nubian Shield | Western<br>Ethiopian           | Moyale                | biotite quartz-<br>diorite    | K-Ar   | 517 ± 9     | biotite   |                                 | cooling age<br>(magmatism)        | OROGENIC                |             | 201    |

| NO  | LON     | LAT     | ORG.* | COUNTRY  | TECTONIC DIVISION        | UNIT              | UNIT NAME              | ROCK                           | METHOD | AGE (Ma)    | MINERAL    | AGETYPE                   | MEANING                    | TECTONIC ENVIRONMENT | CROSREF | ORGREF |
|-----|---------|---------|-------|----------|--------------------------|-------------------|------------------------|--------------------------------|--------|-------------|------------|---------------------------|----------------------------|----------------------|---------|--------|
| 885 | 39.2667 | 4.8500  |       | Ethiopia | Arabian–Nubian Shield    | Western Ethiopian | Dawa Parma river       | biotite augen-gneiss           | K-Ar   | 607 ± 5     | biotite    |                           | cooling age (metamorphism) | METAMORPHISM         |         | 201    |
| 886 | 39.5167 | 5.0667  |       | Ethiopia | Arabian–Nubian Shield    | Western Ethiopian | SW of Negheili         | hornblende gneiss              | K-Ar   | 615± 67     | hornblende |                           | cooling age (metamorphism) | METAMORPHISM         |         | 201    |
| 887 | 39.4500 | 4.9667  |       | Ethiopia | Arabian–Nubian Shield    | Western Ethiopian | SW of Negheili         | hornblende-chlorite gneiss     | K-Ar   | 625 ± 47    | hornblende |                           | cooling age (metamorphism) | METAMORPHISM         |         | 201    |
| 888 | 39.4000 | 4.8667  |       | Ethiopia | Arabian–Nubian Shield    | Western Ethiopian | SW of Negheili         | muscovite gneiss               | K-Ar   | 492 ± 4     | muscovite  |                           | cooling age (metamorphism) | METAMORPHISM         |         | 201    |
| 889 | 42.6500 | 9.2500  |       | Ethiopia | Arabian–Nubian Shield    | Western Ethiopian | E of Harar             | muscovite-quartz pegmatite     | K-Ar   | 569 ± 35    | muscovite  |                           | cooling age (magmatism)    | OROGENIC             |         | 201    |
| 890 | 39.3910 | 13.9350 | fm    | Ethiopia | Arabian–Nubian Shield    | Tigrai            | Hauzien Pluton         | granite                        | Pb-Pb  | 613.4 ± 0.9 | zircon     | evaporation               | crystallization age        | POST-OROGENIC        |         | 202    |
| 891 | 39.5300 | 13.9200 | fm    | Ethiopia | Arabian–Nubian Shield    | Tigrai            | Negash Pluton          | granodiorite                   | Pb-Pb  | 606.0 ± 0.9 | zircon     | evaporation               | crystallization age        | POST-OROGENIC        |         | 202    |
| 892 | 38.4030 | 16.6710 | cop   | Eritrea  | Arabian–Nubian Shield    | Nakfa area        | Wogret granite         | granite                        | Pb-Pb  | 622± 1      | zircon     | evaporation               | crystallization age        | OROGENIC             |         | 203    |
| 893 | 38.4570 | 16.6630 | nc    | Eritrea  | Arabian–Nubian Shield    | Nakfa area        | Nakfa intrusives       | syenite                        | U-Pb   | 628 ±4      | zircon     | evaporation               | crystallization age        | FAULTING             |         | 203    |
| 894 | 38.4140 | 16.6670 | fm    | Eritrea  | Arabian–Nubian Shield    | Nakfa area        | Metasedimentary unit   | metarhyolite                   | U-Pb   | 854 ±3 Ma   | zircon     | SHRIMP                    | crystallization age        | ARC                  |         | 204    |
| 895 | 37.4550 | 14.7680 | fm    | Eritrea  | Arabian–Nubian Shield    | Augaro Area       | Dukambia Granite       | granite                        | Pb-Pb  | 849±20      | zircon     | evaporation               | crystallization age        | ARC                  |         | 205    |
| 896 | 37.3720 | 14.7550 | fm    | Eritrea  | Arabian–Nubian Shield    | Augaro Area       | Adi Berbere Granite    | granite                        | U-Pb   | 849±26      | zircon     | ID-TIMS (upper intercept) | crystallization age        | ARC                  |         | 205    |
| 897 | 35.6140 | 9.0270  | fm    | Ethiopia | Arabian–Nubian Shield    | Wallagga area     | Ganjii granitoids      | monzogranite                   | Pb-Pb  | 622±7       | zircon     | evaporation               | crystallization age        | RIFTING              |         | 206    |
| 898 | 36.6670 | 9.6710  | fm    | Ethiopia | Arabian–Nubian Shield    | Wallagga area     | Guttin granitoids      | K-feldspar megacrystic granite | U-Pb   | 730±2       | zircon     | ID-TIMS (concordia age)   | crystallization age        | OROGENIC             |         | 206    |
| 899 | 35.9600 | 9.0240  | fm    | Ethiopia | Arabian–Nubian Shield    | Wallagga area     | Suqii-Wagga granitoids | two-mica granite               | Pb-Pb  | 698±27      | zircon     | evaporation               | crystallization age        | OROGENIC             |         | 206    |
| 900 | 35.7600 | 9.2440  | fm    | Ethiopia | Arabian–Nubian Shield    | Wallagga area     | Ujjukka granitoids     | granite and granodiorite       | Pb-Pb  | 815±5       | zircon     | evaporation               | crystallization age        | ARC                  |         | 206    |
| 901 | 35.6140 | 9.0270  | fm    | Ethiopia | Arabian–Nubian Shield    | Wallagga area     | Ganjii granitoids      | monzogranite                   | U-Pb   | 623±3       | zircon     | ID-TIMS (lower intercept) | crystallization age        | RIFTING              |         | 206    |
| 902 | 35.4042 | 9.1629  |       | Ethiopia | Western Ethiopian Shield | Ghimbi-Nedjo      | Wayu Meni              | olivine gabbro                 | U-Pb   | 778.1 ± 6.3 | zircon     | SHRIMP                    | crystallization age        | OPHIOLITE            |         | 207    |
| 903 | 35.5054 | 9.6491  |       | Ethiopia | Western Ethiopian Shield | Ghimbi-Nedjo      | Senbet Dura            | hornblende diorite             | U-Pb   | 787.7 ± 8.8 | zircon     | SHRIMP                    | crystallization age        | ARC                  |         | 207    |



| NO  | LON     | LAT     | ORG.<br>* | COUNTRY  | TECTONIC<br>DIVISION           | UNIT                           | UNIT NAME                        | ROCK                                                        | METHOD | AGE (Ma)    | MINERAL | AGETYPE          | MEANING                | TECTONIC<br>ENVIRONMENT | CROSRE<br>F | ORGREF |
|-----|---------|---------|-----------|----------|--------------------------------|--------------------------------|----------------------------------|-------------------------------------------------------------|--------|-------------|---------|------------------|------------------------|-------------------------|-------------|--------|
| 904 | 35.5722 | 9.5518  |           | Ethiopia | Western<br>Ethiopian<br>Shield | Ghimbi-Nedjo                   | Gebeya Kemisa                    | pyroxene<br>diorite                                         | U-Pb   | 794.3 ± 9.4 | zircon  | SHRIMP           | crystallization<br>age | ARC                     |             | 207    |
| 905 | 35.8084 | 9.4507  |           | Ethiopia | Western<br>Ethiopian<br>Shield | Ghimbi-Nedjo                   | Kemashi                          | hornblende<br>diorite                                       | U-Pb   | 856.3 ± 9.8 | zircon  | SHRIMP           | crystallization<br>age | OPHIOLITE               |             | 207    |
| 906 | 35.5054 | 9.6491  |           | Ethiopia | Western<br>Ethiopian<br>Shield | Ghimbi-Nedjo                   | Bikilal-Ghimbi                   | hornblende<br>gabbro                                        | U-Pb   | 846.0 ± 7.6 | zircon  | SHRIMP           | crystallization<br>age | OPHIOLITE               |             | 207    |
| 907 | 35.7400 | 9.1010  | fm        | Ethiopia | Arabian–<br>Nubian Shield      | Western<br>Ethiopian<br>Shield | Homa granitic<br>gneisses        | peralkaline<br>granitic gneiss                              | U-Pb   | 778 ± 49    | zircon  | SHRIMP II        | crystallization<br>age | ARC                     |             | 208    |
| 908 | 35.7370 | 9.0880  | fm        | Ethiopia | Arabian–<br>Nubian Shield      | Western<br>Ethiopian<br>Shield | Homa granitic<br>gneisses        | leucocratic<br>granitic gneiss                              | U-Pb   | 776 ± 12    | zircon  | SHRIMP II        | crystallization<br>age | ARC                     |             | 208    |
| 909 | 37.9360 | 14.0670 | fm        | Ethiopia | Western<br>Ethiopian<br>Shield | Tigray<br>basement             | Tsaliyet and<br>Tembien group    | granite                                                     | U-Pb   | 627.5±1.1   | zircon  | ID-TIMS          | crystallization<br>age | ARC                     |             | 209    |
| 910 | 37.9730 | 14.1270 | fm        | Ethiopia | Western<br>Ethiopian<br>Shield | Tigray<br>basement             | Tsaliyet and<br>Tembien group    | granite                                                     | U-Pb   | 624.24±0.6  | zircon  | ID-TIMS          | crystallization<br>age | ARC                     |             | 209    |
| 911 | 38.1670 | 14.1670 | fm        | Ethiopia | Western<br>Ethiopian<br>Shield | Tigray<br>basement             | Tsaliyet and<br>Tembien group    | granite                                                     | U-Pb   | 610.7 ± 1.1 | zircon  | ID-TIMS          | crystallization<br>age | ARC                     |             | 209    |
| 912 | 33.4986 | 18.7070 |           | Sudan    | Arabian–<br>Nubian Shield      | Bayuda<br>Terrane              | Rahaba-Absol<br>Terrane          | porphyroblasti<br>c biotite<br>metagranite                  | U-Pb   | 815±5       | zircon  | LA-SF-ICP-<br>MS | crystallization<br>age | ARC                     |             | 210    |
| 913 | 33.3919 | 18.6439 |           | Sudan    | Arabian–<br>Nubian Shield      | Bayuda<br>Terrane              | Rahaba-Absol<br>Terrane          | porphyroblasti<br>c<br>quartzfeldspat<br>hic<br>metagranite | U-Pb   | 914.1±5.5   | zircon  | LA-SF-ICP-<br>MS | crystallization<br>age | RIFTING                 |             | 210    |
| 914 | 33.1526 | 18.5344 |           | Sudan    | Arabian–<br>Nubian Shield      | Bayuda<br>Terrane              | Rahaba-Absol<br>Terrane          | porphyroblasti<br>c biotite-<br>muscovite<br>metagranite    | U-Pb   | 912±4       | zircon  | LA-SF-ICP-<br>MS | crystallization<br>age | RIFTING                 |             | 210    |
| 915 | 33.4044 | 18.6095 |           | Sudan    | Arabian–<br>Nubian Shield      | Bayuda<br>Terrane              | Rahaba-Absol<br>Terrane          | meta-<br>monzodiorite                                       | U-Pb   | 909±9       | zircon  | LA-SF-ICP-<br>MS | crystallization<br>age | RIFTING                 |             | 210    |
| 916 | 33.5704 | 18.7181 |           | Sudan    | Arabian–<br>Nubian Shield      | Bayuda<br>Terrane              | Abu Harik and<br>Kurmut Terranes | biotite<br>metagranite                                      | U-Pb   | 794 ± 15    | zircon  | LA-SF-ICP-<br>MS | crystallization<br>age | ARC                     |             | 210    |
| 917 | 33.5537 | 18.7356 |           | Sudan    | Arabian–<br>Nubian Shield      | Bayuda<br>Terrane              | Abu Harik and<br>Kurmut Terranes | medium-<br>grained<br>metagranite                           | U-Pb   | 813 ± 4     | zircon  | LA-SF-ICP-<br>MS | crystallization<br>age | ARC                     |             | 210    |
| 918 | 33.6650 | 18.7318 |           | Sudan    | Arabian–<br>Nubian Shield      | Bayuda<br>Terrane              | Abu Harik and<br>Kurmut Terranes | meta-quartz-<br>monzonite                                   | U-Pb   | 810 ± 10    | zircon  | LA-SF-ICP-<br>MS | crystallization<br>age | ARC                     |             | 210    |
| 919 | 33.6614 | 18.2990 |           | Sudan    | Arabian–<br>Nubian Shield      | Bayuda<br>Terrane              | Abu Harik and<br>Kurmut Terranes | medium-<br>grained<br>metagranite                           | U-Pb   | 808 ± 5     | zircon  | LA-SF-ICP-<br>MS | crystallization<br>age | ARC                     |             | 210    |
| 920 | 33.6334 | 18.6386 |           | Sudan    | Arabian–<br>Nubian Shield      | Bayuda<br>Terrane              | Abu Harik and<br>Kurmut Terranes | medium-<br>grained<br>metagranite                           | U-Pb   | 799 ± 16    | zircon  | LA-SF-ICP-<br>MS | crystallization<br>age | ARC                     |             | 210    |

| NO  | LON     | LAT     | ORG.<br>* | COUNTRY | TECTONIC<br>DIVISION      | UNIT              | UNIT NAME                                | ROCK                                      | METHOD | AGE (Ma)  | MINERAL | AGETYPE          | MEANING                | TECTONIC<br>ENVIRONMENT | CROSRE<br>F | ORGREF |
|-----|---------|---------|-----------|---------|---------------------------|-------------------|------------------------------------------|-------------------------------------------|--------|-----------|---------|------------------|------------------------|-------------------------|-------------|--------|
| 921 | 33.4863 | 18.5612 |           | Sudan   | Arabian–<br>Nubian Shield | Bayuda<br>Terrane | Abu Harik and<br>Kurmut Terranes         | biotite<br>metagranite                    | U-Pb   | 783 ± 13  | zircon  | LA-SF-ICP-<br>MS | crystallization<br>age | ARC                     |             | 210    |
| 922 | 33.5894 | 18.7427 |           | Sudan   | Arabian–<br>Nubian Shield | Bayuda<br>Terrane | Abu Harik and<br>Kurmut Terranes         | biotite<br>metagranite                    | U-Pb   | 700 ± 7   | zircon  | LA-SF-ICP-<br>MS | crystallization<br>age | ARC                     |             | 210    |
| 923 | 33.5177 | 18.3294 |           | Sudan   | Arabian–<br>Nubian Shield | Bayuda<br>Terrane | Abu Harik and<br>Kurmut Terranes         | alkali<br>metagranite                     | U-Pb   | 645.3±5.4 | zircon  | LA-SF-ICP-<br>MS | crystallization<br>age | ARC                     |             | 210    |
| 924 | 33.3879 | 18.4453 |           | Sudan   | Arabian–<br>Nubian Shield | Bayuda<br>Terrane | Abu Harik and<br>Kurmut Terranes         | phorphyritic<br>meta-quartz-<br>monzonite | U-Pb   | 630±4     | zircon  | LA-SF-ICP-<br>MS | crystallization<br>age | ARC                     |             | 210    |
| 925 | 31.4140 | 21.6620 | fm        | Sudan   | Arabian–<br>Nubian Shield | Northern<br>Sudan | Wadi Halfa                               | felsic<br>metavolcanic<br>rocks           | Rb-Sr  | 655 ±20   | WR      | isochrone        | crystallization<br>age | ARC                     |             | 211    |
| 926 | 31.3830 | 21.5890 | fm        | Sudan   | Arabian–<br>Nubian Shield | Northern<br>Sudan | Wadi Halfa                               | alkali granites                           | Rb-Sr  | 530 ±10   | WR      | isochrone        | crystallization<br>age | RIFTING                 |             | 211    |
| 927 | 30.9610 | 21.3760 | fm        | Sudan   | Arabian–<br>Nubian Shield | Northern<br>Sudan | Wadi Halfa                               | orthogneiss                               | Pb-Pb  | 719± 14   | zircon  | evaporation      | crystallization<br>age | ARC                     |             | 211    |
| 928 | 34.1660 | 28.6413 |           | Egypt   | Arabian–<br>Nubian Shield | Sinai             | Wadi Zaghra                              | diorite                                   | U-Pb   | 614 ± 4   | zircon  | LA-ICP-MS        | crystallization<br>age | RIFTING                 |             | 212    |
| 929 | 34.1662 | 28.6413 |           | Egypt   | Arabian–<br>Nubian Shield | Sinai             | Wadi Zaghra                              | diorite                                   | U-Pb   | 631 ± 4   | zircon  | LA-ICP-MS        | crystallization<br>age | RIFTING                 |             | 212    |
| 930 | 34.1807 | 28.6333 |           | Egypt   | Arabian–<br>Nubian Shield | Sinai             | Wadi Zaghra                              | mozogranite                               | U-Pb   | 605 ± 7   | zircon  | LA-ICP-MS        | crystallization<br>age | RIFTING                 |             | 212    |
| 931 | 34.1764 | 28.6363 |           | Egypt   | Arabian–<br>Nubian Shield | Sinai             | Wadi Zaghra                              | granite                                   | U-Pb   | 622 ± 6   | zircon  | LA-ICP-MS        | crystallization<br>age | RIFTING                 |             | 212    |
| 932 | 34.0790 | 28.7570 |           | Egypt   | Arabian–<br>Nubian Shield | Sinai             | Sa'al volcano-<br>sedimentary<br>complex | ash-fall                                  | U-Pb   | 1028 ± 5  | zircon  | SIMS             | crystallization<br>age | ARC                     |             | 213    |
| 933 | 34.0810 | 28.7520 |           | Egypt   | Arabian–<br>Nubian Shield | Sinai             | Sa'al volcano-<br>sedimentary<br>complex | ash-fall                                  | U-Pb   | 1031 ± 5  | zircon  | SIMS             | crystallization<br>age | ARC                     |             | 213    |
| 934 | 34.0920 | 28.7370 |           | Egypt   | Arabian–<br>Nubian Shield | Sinai             | Sa'al volcano-<br>sedimentary<br>complex | ash-fl ow                                 | U-Pb   | 1110 ± 6  | zircon  | SIMS             | crystallization<br>age | ARC                     |             | 213    |
| 935 | 34.0960 | 28.7440 |           | Egypt   | Arabian–<br>Nubian Shield | Sinai             | Sa'al volcano-<br>sedimentary<br>complex | gabbro Sill                               | U-Pb   | 1017 ± 5  | zircon  | SIMS             | crystallization<br>age | ARC                     |             | 213    |
| 936 | 34.2070 | 28.7580 |           | Egypt   | Arabian–<br>Nubian Shield | Sinai             | Sa'al volcano-<br>sedimentary<br>complex | quartz<br>Monzonite                       | U-Pb   | 819 ± 4   | zircon  | SIMS             | crystallization<br>age | ARC                     |             | 213    |

Unit and Unit names were directly taken from the sources, provided by authors themselves.

Gray shaded data were not taken into any consideration because of their high errors (>10%).

\*Coordinates provided by the authors if there is no indication next to the coordinates

cop: center of pluton (unit, formation etc.). Coordinate is taken from the center of the unit (that can be recognized in a general map) when coordinate is not provided;

fm: from map. Coordinate is extracted from rectification of the maps provided;

fl: list of the ages including coordinates provided.

Note: Although it is too small for the resolution of this study, different coordinate systems used in different countries can cause a deviation on the coordinates extracted from rectified maps (generally < 12 km).

**Table S2.** The rock content of the main nine accidental units of the Saharides and their brief descriptions. The data were gathered chiefly from the following: references 214, 215, 216, 217, 218, 68, 219, 220, 221, 222, 180,158, 223, 224, 225, 226, 227, 228, 229, 230, 21, 231, 232, 233, 234, 235, 236, 237, 121, 238, 18, 138, 239, 240, 95, 205, 157, 241, 242, 126, 243, 193, 122, 123, 244, 245, 246, 247, 248, 249, 250, 251, 252, 253, 254, 255, 256, 257, 258,156, 259, 260, 261, 262, 263, 264, 265, 266, 267, 268, 269. We have taken the rock descriptions in certain cases verbatim from portions of texts of the papers cited above with a view to facilitate comparison with our sources. What is not cited here is the older literature we consulted, especially in languages other than English, in cases it is superseded or just repeated by newer work.

| Name                        | Age             | Brief Description                                                                                                                                                                                                                                                                                                                                                          | Interpretation       |
|-----------------------------|-----------------|----------------------------------------------------------------------------------------------------------------------------------------------------------------------------------------------------------------------------------------------------------------------------------------------------------------------------------------------------------------------------|----------------------|
| <i>I. Bayuda-Atbay Unit</i> |                 |                                                                                                                                                                                                                                                                                                                                                                            |                      |
| Al Hawiyah granite suite    | lower Ediacaran | The exposures are undeformed, discordant plutons, which are made of monzogranite and syenogranite with transitions to alkali-feldspar granite and granodiorite. The members of the unit are Turabah granite, Layyah complex, Rahwah granite and others.                                                                                                                    | Magmatic arc         |
| Younger granites            | lower Ediacaran | Pink to red granites of lower Ediacaran age.                                                                                                                                                                                                                                                                                                                               | Magmatic arc         |
| Fatima Group                | Cryogenian      | Basal polymict conglomerate overlain by a volcanic and sedimentary assemblage that includes rhyolitic breccia, tuff, and ignimbrite, basalt, arkosic sandstone, tuffaceous sandstone, shale, limestone, and conglomerate.                                                                                                                                                  | Forearc basin        |
| Samd tonalite               | Cryogenian      | The unit is an elliptical pluton made of tonalite, which is weakly foliated and slightly metamorphosed.                                                                                                                                                                                                                                                                    | Magmatic arc         |
| Nu'man Complex              | Cryogenian      | Consists of biotite monzogranite and hornblende-biotite monzogranite to granodiorite orthogneiss and subordinate massive granite.                                                                                                                                                                                                                                          | Magmatic arc         |
| Older granites              | Cryogenian      | Grey granites of Cryogenian age.                                                                                                                                                                                                                                                                                                                                           | Magmatic arc         |
| Homogar Series              | Cryogenian      | This is mainly made of weakly metamorphosed volcanic rocks and includes gabbro, granite and syenite intrusions. The series is more than 1 km thick. The lower age limit of the Homogar is marked by the angular unconformity between the Homogar and Nafirdeib series. It may be correlated with the Dokhan (Egypt) and the Shammer Series (Saudi Arabia) <sup>224</sup> . | Magmatic arc         |
| Samran Group                | Tonian          | Mafic to felsic lavas and volcanoclastic rocks, graywacke, polymict conglomerate, shale, siltstone, chert, marble, and quartzofeldspathic schist, mica schist, amphibole schist. Chlorite schist and subordinate interlayered sericite schist and andesitic tuff are locally common, representing fine-grained distal volcanic deposits.                                   | Accretionary complex |

| Name           | Age    | Brief Description                                                                                                                                                                                                                                                                                                                                                                                                                                                                                                                                                                                                                                                                                                                                                                                                                                                                                                                                                                                                             | Interpretation                                 |
|----------------|--------|-------------------------------------------------------------------------------------------------------------------------------------------------------------------------------------------------------------------------------------------------------------------------------------------------------------------------------------------------------------------------------------------------------------------------------------------------------------------------------------------------------------------------------------------------------------------------------------------------------------------------------------------------------------------------------------------------------------------------------------------------------------------------------------------------------------------------------------------------------------------------------------------------------------------------------------------------------------------------------------------------------------------------------|------------------------------------------------|
| Zibarah Group  | Tonian | Massive, to well-bedded, to schistose basalt, andesite, and mafic tuffs; subordinate dacite, rhyolite, greenstone, greenschist; and schistose sedimentary rocks such as sericite-chlorite schist, chlorite schist, quartz-feldspar-sericite-chlorite schist, epidote-tremolite and actinolite-chlorite schist. Locally, the epiclastic rocks include poorly sorted, medium- to coarse-grained, cross-bedded and ripple-marked sandstone and massive graywacke containing pebbles and small cobbles of greenstone, beds of coarse-pebble to small-boulder conglomerate, and marble. The axis of the Fatima shear zone is characterized by amphibolite, quartzofeldspathic schist, and paragneiss interlayered with calc-silicate rock, marble, garnetiferous metaquartzite, and banded biotite-quartz-feldspar paragneiss. These rocks grade into migmatite adjacent to intrusion of granite gneiss. Lavas in the group are calc-alkalic and subordinate tholeiitic, and are interpreted as products of a maturing island-arc. | Accretionary complex or forearc invaded by arc |
| Hali Group     | Tonian | Tightly folded and faulted moderately to strongly metamorphosed rocks that vary in their degree of structural alteration from phyllite to schist to granoblastic paragneiss. The protoliths are sandstone, pebble conglomerate, siltstone, limestone, and subordinate volcanoclastic rocks. Much of the sequence includes greenschist-facies gray-green phyllite, slate, graywacke, feldspathic arkose, marble, and pebble-to-cobble polymict conglomerate containing clasts of quartz diorite, quartzite, chert, and phyllite.                                                                                                                                                                                                                                                                                                                                                                                                                                                                                               | Accretionary complex                           |
| At Ta'if Group | Tonian | Metamorphosed mafic to felsic lavas and interbedded volcanoclastic rocks, amphibolite, albite-chlorite-epidote schist, garnetiferous quartzofeldspathic schist, chlorite schist, talc-chlorite schist, quartz-mica schist, and rare calc-silicate rocks, marble, and magnetite quartzite; Massive, schistose, and, locally, banded and gneissic amphibolite are the dominant rock types, but well-layered alternations of amphibolite and quartzofeldspathic schist and metabasalt are common. Porphyritic andesitic lava, massive porphyritic rhyodacitic lava, schistose rhyolite, and dacitic metatuff are locally present. Volcanoclastic rocks include mafic-to-felsic tuff and breccia.                                                                                                                                                                                                                                                                                                                                 | Magmatic Arc                                   |

| Name                         | Age    | Brief Description                                                                                                                                                                                                                                                                                                                                                                                                                                                                                                                                                                                                                                                                                                                                                                                                                                                                                                                                                                                                                                                                                                                                                                                                                                                                     | Interpretation                                       |
|------------------------------|--------|---------------------------------------------------------------------------------------------------------------------------------------------------------------------------------------------------------------------------------------------------------------------------------------------------------------------------------------------------------------------------------------------------------------------------------------------------------------------------------------------------------------------------------------------------------------------------------------------------------------------------------------------------------------------------------------------------------------------------------------------------------------------------------------------------------------------------------------------------------------------------------------------------------------------------------------------------------------------------------------------------------------------------------------------------------------------------------------------------------------------------------------------------------------------------------------------------------------------------------------------------------------------------------------|------------------------------------------------------|
| Al Lith                      | Tonian | Amphibolite, amphibolite schist, quartz-rich schist, and paragneiss interlayered with orthogneiss, and appear, overall, to be a succession of metamorphosed basaltic volcanic and volcanoclastic rocks, epiclastic sedimentary rocks, and subordinate rhyolite and marble. Basaltic rocks are represented by massive to schistose, fine- to medium-grained amphibolite, epidote amphibolite, quartz amphibolite, hornblende hornfels, greenschist, and mafic paragneiss. Other rocks types are paraamphibolite, garnet-mica schist, metaandesite, metagraywacke, metamorphosed lithic, crystal, and ash-fall tuffs, minor agglomerate, hornblende schist, and hornblende gneiss, quartzo-feldspathic schist and gneiss, impure quartzite, rare magnetite-bearing quartzite, marble, and metarhyolite and rhyolite tuff. A distinctive rock type in the belt is kyanite-bearing quartz-rich metaarenite, present as andalusite-kyanite-muscovite quartzite, rutile-muscovite-kyanite quartzite, muscovite-kyanite quartzite, staurolite-biotite-albite-sericite-quartz-andalusite schist, and lazulite-andalusite quartzite. The protoliths of the sedimentary rocks were probably sandstone, shale, claystone, sandy limestone, interbedded limestone, graywacke, arkose, and pelite. | Accretionary complex with possible basalt slivers    |
| Bidah Belt                   | Tonian | Greenschist to amphibolite grade shale, phyllite, phyllitic quartzite, argillite, ferruginous quartzite, marble, graywacke, and limestone.                                                                                                                                                                                                                                                                                                                                                                                                                                                                                                                                                                                                                                                                                                                                                                                                                                                                                                                                                                                                                                                                                                                                            | Accretionary complex and possibly also forearc basin |
| Buwwah suite/coal with Bidah | Tonian | Plutonic rocks, which are approximately between 855-815 Ma. They include well-bedded to massive, fine-to-medium grained basaltic, andesitic, dacitic, and rhyolitic flows and tuffs, abundant volcanoclastic rocks, and significant amounts of epiclastic sedimentary rocks, and represent one or more volcanic arcs.                                                                                                                                                                                                                                                                                                                                                                                                                                                                                                                                                                                                                                                                                                                                                                                                                                                                                                                                                                 | Magmatic arc                                         |
| Hufayriyah Complex           | Tonian | Irregular plutons of tonalite.                                                                                                                                                                                                                                                                                                                                                                                                                                                                                                                                                                                                                                                                                                                                                                                                                                                                                                                                                                                                                                                                                                                                                                                                                                                        | Magmatic arc                                         |
| Qiya Complex                 | Tonian | Deformed tonalite, granodiorite, and granite.                                                                                                                                                                                                                                                                                                                                                                                                                                                                                                                                                                                                                                                                                                                                                                                                                                                                                                                                                                                                                                                                                                                                                                                                                                         | Magmatic arc                                         |
| Kamil suite                  | Tonian | A suite of mafic, intermediate and felsic plutonic rocks of calc-alkalic and locally trondhjemitic affinities, including tonalite and trondhjemite, diorite and quartz diorite, lesser amounts of granodiorite and quartz monzonite, and minor monzogranite. The rocks are weakly metamorphosed and variably deformed.                                                                                                                                                                                                                                                                                                                                                                                                                                                                                                                                                                                                                                                                                                                                                                                                                                                                                                                                                                | Magmatic arc                                         |

| Name                      | Age    | Brief Description                                                                                                                                                                                                                                                                                                                                                                                                                                                                                                                                                                                                                                                                                                                                                                                                                                                                                                                                                                  | Interpretation                       |
|---------------------------|--------|------------------------------------------------------------------------------------------------------------------------------------------------------------------------------------------------------------------------------------------------------------------------------------------------------------------------------------------------------------------------------------------------------------------------------------------------------------------------------------------------------------------------------------------------------------------------------------------------------------------------------------------------------------------------------------------------------------------------------------------------------------------------------------------------------------------------------------------------------------------------------------------------------------------------------------------------------------------------------------|--------------------------------------|
| Tsaliet Group             | Tonian | In Tigre and Eritrea, it is formed of metavolcanics ranging from basalts to dacites and rhyolites with predominance of andesites, and associated sediments: greywackes, agglomerates and slates. The metasediments bear evidence of shallow water origin, ripple marks, crossbedding, sun cracks etc. In the western and southern parts of the fold belt this unit is represented mainly by sediments of pelitic and semi-pelitic nature intercalated with occasional volcanic flows of andesitic or dacitic-rhyolitic composition. These rocks contain strongly deformed bodies of early diorites and granodiorites and large late or post-tectonic (batholithic) intrusions of granites and granodiorites <sup>215</sup> . A synthesis of available crystallization ages (mainly zircon U-Pb and Pb-Pb) on Tsaliet arc crust shows that igneous activity occurred mainly at 820-740 Ma, but older ~850 Ma arc volcanics occur in neighbouring Eritrea <sup>138, 205, 241</sup> . | Accretionary complex invaded by arc  |
| Tsaliet Group (volcanics) | Tonian | Andesite, lavas and tuffs, tuffaceous slates and greywackes of the Tsaliet Group.                                                                                                                                                                                                                                                                                                                                                                                                                                                                                                                                                                                                                                                                                                                                                                                                                                                                                                  | Magmatic arc                         |
| Abu Harik Series          | Tonian | They form a belt some 20 km wide striking N-NE in the southeastern part of the Bayuda area. It consists of highly metamorphosed, partly migmatized to granitized biotite-hornblende gneisses, hornblende gneisses and amphibolites with quartzite lenses <sup>224</sup> .                                                                                                                                                                                                                                                                                                                                                                                                                                                                                                                                                                                                                                                                                                          | Accretionary complex invaded by arc? |
| Rahaba Series             | Tonian | They are conformably overlying the Kurmut Series and in parts interfingering with this series. In the basal parts of the series, biotite and hornblende gneisses predominate with numerous amphibolite intercalations. Acidic muscovite-bearing quartz feldspar gneisses, with amphibolite intercalations in thin layers, and lenses of calc-silicate garnetiferous quartzitic mica schists and graphitic schists, form the typical rocks of the upper parts of the Rhaba Series in the northeastern and central part of the Bayuda desert. They are generally well foliated and intensely folded. The fold axes dip west and sw in the southern, central and western parts of the Beyuda Desert, and southeast and northwest in the southern part of the area <sup>224</sup> .                                                                                                                                                                                                    | Accretionary complex invaded by arc  |

| Name               | Age                   | Brief Description                                                                                                                                                                                                                                                                                                                                                                                                                                                                                                                                                                                                                                                                                                                                                                                                                                                                                                                                                                                                                                                                                                 | Interpretation                      |
|--------------------|-----------------------|-------------------------------------------------------------------------------------------------------------------------------------------------------------------------------------------------------------------------------------------------------------------------------------------------------------------------------------------------------------------------------------------------------------------------------------------------------------------------------------------------------------------------------------------------------------------------------------------------------------------------------------------------------------------------------------------------------------------------------------------------------------------------------------------------------------------------------------------------------------------------------------------------------------------------------------------------------------------------------------------------------------------------------------------------------------------------------------------------------------------|-------------------------------------|
| Kurmut Series      | Tonian                | <p>The rocks of the Kurmut Series are exposed in the eastern and northern parts of the Bayida area. They are well foliated and folded. The fold axes plunge to the west and southwest with north to northwest dipping axial planes in the southern two-third of the area. They plunge to the southeast and east, and northwest to to west with southwest and south dipping axial planes in the northern part. The rocks of series mainly consist of metasediments such as quartzitesites, quartzitic schists, paragneisses, mics schists, graphite schists, calc-mica schists, calc-silicate rocks and marbles with intrusions of metavolcanic rocks. Mixed metamorphic rocks indicate an origin of typical sedimentation shallow epicontinental shelf areas. The degree of metamorphism of the Kurmut Series is not high as that of the ABu Harik Series<sup>224</sup>. Eleven zircons from the Dam Et Tor gneiss have been analyzed. Nine concordant zircons define a Concordia age at ~860 Ma<sup>122</sup>.</p>                                                                                               | Accretionary complex invaded by arc |
| Tambien Group      | Tonian to Cryogenian? | <p>(a) slates, chlorite and graphite phyllite, limostone, dolomite, (b) limestone with algae and oncolite. The Tambien Group of northern Ethiopia consists of an ~5km-thick mixed carbonate-siliciclastic succession. These sediments accumulated above volcanics and volcanoclastics of the Tsaliyet Group. The ca. 610 Ma-aged plutons suggest a minimum age constraint on the timing of the Tambien Group deposition<sup>255</sup>. The easternmost Negash synclinorium is cored by a diamictite with extrabasinal clasts interpreted with diamictites of the ca. 717-662 Ma Sturtian glaciation<sup>240, 245</sup>. Negash diamictite and Shiraro sequence contain detrital zircons derived from underlying ~0.85–0.74 Ga volcanics, a small number of 1.1 Ga zircons (likely inherited within the underlying arc crust) were also detected. The youngest detrital zircons in these sequences are 0.75 and 0.74 Ga<sup>193</sup>. Integration of available geochronological information suggests c. 775-660 Ma as a plausible constraining deposition of the prospective glacial intervals<sup>247</sup>.</p> | Forearc or intra-arc basin          |
| Didikama Formation | Tonian?               | <p>Slates and dolomites. Lower member of the Tambien Group. Occurrence of evaporite pseudomorphs in lower Didikama Formation dolomite was interpretes as &lt; 774.7 +/- 4.8 Ma<sup>246</sup>.</p>                                                                                                                                                                                                                                                                                                                                                                                                                                                                                                                                                                                                                                                                                                                                                                                                                                                                                                                 | Forearc or intra-arc basin          |

| Name                        | Age             | Brief Description                                                                                                                                                                                                                                                                                                                                                                                                                                                                                                                                                                                                                                                                                                                                                                                                                                                                                                                                                                                                                                                                                                                       | Interpretation                      |
|-----------------------------|-----------------|-----------------------------------------------------------------------------------------------------------------------------------------------------------------------------------------------------------------------------------------------------------------------------------------------------------------------------------------------------------------------------------------------------------------------------------------------------------------------------------------------------------------------------------------------------------------------------------------------------------------------------------------------------------------------------------------------------------------------------------------------------------------------------------------------------------------------------------------------------------------------------------------------------------------------------------------------------------------------------------------------------------------------------------------------------------------------------------------------------------------------------------------|-------------------------------------|
| Nafirdeib and Odi series    | Tonian?         | Both series are made up of sedimentary volcanic complex. The metasedimentary volcanic rocks are of the greenschist facies with basic and ultrabasic intrusions, and calcl-alkali batholith granitoids. The Odi Series is made up of a variety of metamorphic schists, marbles, quartzites with rare intercalations of amphibolites and greenstone effusive rocks. The Nafirdeib Seris is mainly made up of basic to intermediate altered effusive rocks and tuffs with intercalating siliceous schists, marbles and graywackes. In the upper part of the series, the sedimentary rocks are more common with intercalations of tuffs and basic greenstone effusive rocks. The Odi and Nafirdeib Series are correlated with the Abu Zeran and Atalla Series in Egypt, Abu Baish Halaban and Hali Series in Saudi Arabia, Mormora and Txaliet Seris in Ethiopia. Rocks of both series are deformed to linear folds, but the Odi Series is more intensely folded (isoclinal, often overturned folds) <sup>224</sup> . Ten limited number of zircons suggest ages between 840 and 880 Ma from a rhyolite at the Aquaba Pass <sup>121</sup> . | Accretionary complex invaded by arc |
| Absol Series                | Tonian?         | Quartz mica schists, lenticular metavolcanics, thin lenses of calcsilicate schists. In the area southwest, west and northwest of Al Shireik, the upper parts of the Rhaba Series interlock with or are overlain by the quartz micaschists, graphite schists, manganese schists, and rare intercalations of marbles and calc-silicates schists of the Arbol Series. These metasediments contain lenticular bodies of amphibolites and hornblende gneisses, up to 1km thick, which have probably been formed from basic volcanic rocks. The predominantly clastic rocks were originally deposited on a rise in the marginal basin and are typical, together with the volcanic rocks, of island arc facies <sup>224</sup> . Absol eries interfingers with gneiss-quartz-feldspathic Rhaba Sries forming the core of a syncline <sup>253</sup> . The medium K-granite-granodiorite in the northeastern Bayuda Desert was discordantly emplaced at 900 Ma into high-grade metamorphic schists and amphibolites of the Absol Series <sup>122</sup> .                                                                                          | Accretionary complex invaded by arc |
| <b>II. Mecca-Jizan Unit</b> |                 |                                                                                                                                                                                                                                                                                                                                                                                                                                                                                                                                                                                                                                                                                                                                                                                                                                                                                                                                                                                                                                                                                                                                         |                                     |
| Shayma Nasir Group          | upper Ediacaran | Polymict conglomerate; basaltic, andesitic, dacitic, and rhyolitic lava, tuff, and agglomerate; and red-brown arkosic, volcanoclastic, and calcareous sandstone                                                                                                                                                                                                                                                                                                                                                                                                                                                                                                                                                                                                                                                                                                                                                                                                                                                                                                                                                                         | Magmatic arc                        |
| Jibalah Group               | upper Ediacaran | Polymict conglomerate, arkosic sandstone, siltstone, well-bedded to stromatolitic limestone, shale, rhyolite and dacite lava, breccia, and tuff, and andesite lava and tuff; red, brown, purplish brown, or variegated gray-green and red.                                                                                                                                                                                                                                                                                                                                                                                                                                                                                                                                                                                                                                                                                                                                                                                                                                                                                              | Arc slivers                         |
| Ediacaran rhyolite          | upper Ediacaran | Rhyolite.                                                                                                                                                                                                                                                                                                                                                                                                                                                                                                                                                                                                                                                                                                                                                                                                                                                                                                                                                                                                                                                                                                                               | Pull-apart basin product            |
| Hadb ash Sharar suite       | upper Ediacaran | Granite, granodiorite, and gabbro. The suite includes monzogranite, alkali-feldspar granite, aegerine-reibekite alkali granite, and small bodies of gabbro and granodiorite.                                                                                                                                                                                                                                                                                                                                                                                                                                                                                                                                                                                                                                                                                                                                                                                                                                                                                                                                                            | Magmatic arc                        |



| Name                          | Age             | Brief Description                                                                                                                                                                                                                                                                                                                                                                                                                                                                                                                                                                                                                                                                                                                                                                                                                                                                                                                                                                                                                                                                                                              | Interpretation                                                |
|-------------------------------|-----------------|--------------------------------------------------------------------------------------------------------------------------------------------------------------------------------------------------------------------------------------------------------------------------------------------------------------------------------------------------------------------------------------------------------------------------------------------------------------------------------------------------------------------------------------------------------------------------------------------------------------------------------------------------------------------------------------------------------------------------------------------------------------------------------------------------------------------------------------------------------------------------------------------------------------------------------------------------------------------------------------------------------------------------------------------------------------------------------------------------------------------------------|---------------------------------------------------------------|
| Khaniq Formation              | lower Ediacaran | Sequence of massive, nonmetamorphosed rhyolite, dacite, and andesite lava and subordinate tuff                                                                                                                                                                                                                                                                                                                                                                                                                                                                                                                                                                                                                                                                                                                                                                                                                                                                                                                                                                                                                                 | Magmatic arc                                                  |
| Dakhabag Formation            | lower Ediacaran | Purple sandstone, subordinate siltstone, and rare, possibly algal, limestone.                                                                                                                                                                                                                                                                                                                                                                                                                                                                                                                                                                                                                                                                                                                                                                                                                                                                                                                                                                                                                                                  | Forearc basin sliced by arc shaving faults                    |
| Al Junaynah Formation         | lower Ediacaran | Basal polymict conglomerate overlain by arkosic sandstone, siltstone, and slate                                                                                                                                                                                                                                                                                                                                                                                                                                                                                                                                                                                                                                                                                                                                                                                                                                                                                                                                                                                                                                                | Arc-slicing fault basin                                       |
| Abbasiyah granodiorite        | lower Ediacaran | Small plutons of biotite-hornblende granodiorite and minor monzogranite.                                                                                                                                                                                                                                                                                                                                                                                                                                                                                                                                                                                                                                                                                                                                                                                                                                                                                                                                                                                                                                                       | Magmatic arc                                                  |
| Thurayban granodiorite        | lower Ediacaran | It is a complex of nested ring-dikes composed of biotite-muscovite granodiorite and inward-dipping metasedimentary and metavolcanic spta.                                                                                                                                                                                                                                                                                                                                                                                                                                                                                                                                                                                                                                                                                                                                                                                                                                                                                                                                                                                      | Magmatic arc                                                  |
| Wadbah suite                  | lower Ediacaran | Plutons of biotite-hornblende granodiorite and monzogranite and minor tonalite. It includes a pluton that discordantly cuts serpentinite schist along the Ibran shear zone, and sheared and mylonitic plutons along the Junaynah fault zone.                                                                                                                                                                                                                                                                                                                                                                                                                                                                                                                                                                                                                                                                                                                                                                                                                                                                                   | Magmatic arc                                                  |
| Younger Granites              | lower Ediacaran | Younger granites in Ethiopia and Eritrea, which are mainly made of pink to red colour granites.                                                                                                                                                                                                                                                                                                                                                                                                                                                                                                                                                                                                                                                                                                                                                                                                                                                                                                                                                                                                                                | Magmatic arc                                                  |
| Buqaya and Qarnayn formations | Cryogenian      | Andesitic tuffs, breccias, and massive lavas, and basaltic sills and dikes. The felsic rocks include rhyolite porphyry, dacite, trachyte flows, thickly bedded lithic, lapilli, and welded ash-flow tuffs, and volcanic conglomerate and breccia; Sedimentary rocks are conspicuous in the central and eastern parts of the Bayda group outcrop area, and consist of interbedded sandstone and shale, in beds 1 cm-30 m thick, forming sandstone-shale units up to 1000 m thick, subordinate andesitic and felsic tuff, and purple sandstone, siltstone, and polymict conglomerate containing subrounded pebbles and cobbles of mafic and felsic volcanic rocks and granite. East and southeast of Bi'r al Bayda, the formation includes as much as 8000 m of lithic arenite and siltstone well-bedded in depositional units 10-30 cm thick, pebbly, well-bedded to massive volcanoclastic rocks, and local limestone. Sedimentary structures such as cross bedding, ripples, graded bedding, and mud cracks, and load casts are common. A magnetite-rich banded-iron formation is locally present in the vicinity of Shaghab. | Forearc basin invaded by arc                                  |
| Ash Sha'ib Group              | Cryogenian      | The rocks appear to have lower $\epsilon\text{Nd}(t)$ values than adjacent rocks, and may constitute a separate domain (sub-terrane) within the Asir terrane, referred to as the Tathlith terrane <sup>254</sup> . The group is mostly high-grade amphibolite and paragneiss but includes greenschist-facies volcanic and sedimentary rocks; the high-grade rocks include hornblende-quartz-feldspar granofels and paragneiss, iron-stained felsic and amphibolitic schists, amphibolite, metatuff, calc-silicate and quartzitic rocks, marble and dolomite, magnetite-bearing cordierite-pyroxene granofels, cordierite-quartz granofels, variably sericitized and chloritized quartz-feldspar granofels, and leucocratic biotite-quartz-feldspar schist and graphitic schist.                                                                                                                                                                                                                                                                                                                                                | Ophirag and ocean floor turbidites in an accretionary complex |

| Name                 | Age        | Brief Description                                                                                                                                                                                                                                                                                                                                                                                                                                                      | Interpretation         |
|----------------------|------------|------------------------------------------------------------------------------------------------------------------------------------------------------------------------------------------------------------------------------------------------------------------------------------------------------------------------------------------------------------------------------------------------------------------------------------------------------------------------|------------------------|
| Atura Formation      | Cryogenian | Polymict conglomerate as much as 1 km thick with boulder-, cobble-, and pebble-clasts of the underlying rocks, overlain by arkose, pebbly sandstone or diamictite, mudstone, tuff, and minor carbonate                                                                                                                                                                                                                                                                 | Forearc basin fill     |
| Hishash granite      | Cryogenian | Pluton with an irregular shape made of monzogranite and subordinate granodiorite <sup>235</sup> .                                                                                                                                                                                                                                                                                                                                                                      | Magmatic arc           |
| Alawah tonalite      | Cryogenian | Exposes as a small tonalite pluton, which is partly covered by Quaternary alluvium and Keinozoic sedimentary and volcanic rocks.                                                                                                                                                                                                                                                                                                                                       | Magmatic arc           |
| Kawr suite           | Cryogenian | It is mostly made of monzogranite, syenogranite and granodiorite, but includes a significant amount of alkali-feldspar and riebeckite- and aegerine-bearing alkali diorite as well as more mafic components such as diabase and gabbro.                                                                                                                                                                                                                                | Magmatic arc           |
| Ibn Hasbal suite     | Cryogenian | Plutons that range in composition from monzogranite, to alkali-feldspar granite, and alkali granite. It is broadly contemporary with the Kawr suite.                                                                                                                                                                                                                                                                                                                   | Magmatic arc           |
| Ruwayhah suite       | Cryogenian | An assemblage of mafic intrusions, including tonalite. Ref. 216 interprets this unit as to be the roots of the 'Halaban arc'.                                                                                                                                                                                                                                                                                                                                          | Magmatic arc           |
| Nabitah gneiss suite | Cryogenian | Strongly deformed granitoids that has a composition between tonalite, granodiorite and monzogranite and include granodiorite and monzogranite gneisses. The gneisses consist of granodiorite, monzogranite and subordinate quartz diorite, tonalite, and amphibolite. Xenoliths of amphibolite and biotite schist are locally abundant.                                                                                                                                | Magmatic arc           |
| Samran Group         | Tonian     | Mafic to felsic lavas and volcanoclastic rocks, graywacke, polymict conglomerate, shale, siltstone, chert, marble, and quartzofeldspathic schist, mica schist, amphibole schist. Chlorite schist and subordinate interlayered sericite schist and andesitic tuff are locally common, representing fine-grained distal volcanic deposits.                                                                                                                               | Accretionary complex   |
| Ghamr Group          | Tonian     | Polymict conglomerate containing volcanic clasts supposedly derived from the Mahd group and granite clasts derived from the Ram Ram complex; coarse-grained epiclastic sandstones; rhyolite and dacite lava flows, tuffite, volcanic breccia, and conglomerate; and subordinate basalt, basaltic-andesite and andesite lava flows, breccia, and tuffite. The rocks are only moderately deformed, and stratigraphic relationships within the group are clearly evident. | Forearc invaded by arc |

| Name                | Age    | Brief Description                                                                                                                                                                                                                                                                                                                                                                                                                                                                                                                                                                                                                                                                                                                                                                                                                                                                                                                                                                                                                                                                                                                                                                                                                                                                                                                                                                                                                                                                                                                                                                                                                                                                                                                                                                                                                                                                                                                                                                                                                                                                                                                                                                                                                                                                                                                                                                                      | Interpretation                                                    |
|---------------------|--------|--------------------------------------------------------------------------------------------------------------------------------------------------------------------------------------------------------------------------------------------------------------------------------------------------------------------------------------------------------------------------------------------------------------------------------------------------------------------------------------------------------------------------------------------------------------------------------------------------------------------------------------------------------------------------------------------------------------------------------------------------------------------------------------------------------------------------------------------------------------------------------------------------------------------------------------------------------------------------------------------------------------------------------------------------------------------------------------------------------------------------------------------------------------------------------------------------------------------------------------------------------------------------------------------------------------------------------------------------------------------------------------------------------------------------------------------------------------------------------------------------------------------------------------------------------------------------------------------------------------------------------------------------------------------------------------------------------------------------------------------------------------------------------------------------------------------------------------------------------------------------------------------------------------------------------------------------------------------------------------------------------------------------------------------------------------------------------------------------------------------------------------------------------------------------------------------------------------------------------------------------------------------------------------------------------------------------------------------------------------------------------------------------------|-------------------------------------------------------------------|
| Arj and Mahd Groups | Tonian | <p>Basaltic to andesitic lava and tuff, felsic tuff, quartz keratophyre and chert, limestone, sandstone, conglomerate, intrusive breccia, massive andesite, sandstone, siltstone, and conglomerate; A distinctive polymict diamictite 1-5 m thick composed of matrix-supported angular to subangular clasts of Dhukhr-batholith, granitic, and felsic volcanic rocks in a dark-gray, immature, arkosic matrix type is at the base of the Mahd group south of Mahd adh Dhahab; The rest of the group consists of tholeiitic to calc-alkalic basalt, basaltic andesite. They are differentiated on the source map<sup>220</sup> but combined here because of the map scale. The Arj group is probably the older of the two and is interpreted by ref. 220 to be unconformable beneath the Mahd group. The rocks are intruded by the Hufayriyah tonalite and Ram Ram complex, overthrust by the Bi'r Umq mafic-ultramafic complex, and yield a SHRIMP crystallization age of <math>775 \pm 5</math> Ma<sup>126</sup> consistent with an unreliable Rb-Sr age of <math>772 \pm 28</math> Ma obtained from Mahd group rhyolite<sup>219</sup> and with SHRIMP ages of <math>785 \pm 6</math> Ma, <math>769 \pm 6</math> Ma, and <math>749 \pm 10</math> Ma obtained from the Hufayriyah and Ram rocks<sup>126</sup>. The map unit is treated here as <math>\sim 785</math>-<math>775</math> Ma. The rocks include basaltic to andesitic lava and tuff, felsic tuff, quartz keratophyre and chert, limestone, sandstone, conglomerate, intrusive breccia, massive andesite, sandstone, siltstone, and conglomerate<sup>220, 233</sup>. A distinctive polymict diamictite 1-5 m thick composed of matrix-supported angular to subangular clasts of Dhukhr-batholith, granitic, and felsic volcanic rocks in a dark-gray, immature, arkosic matrix type is at the base of the Mahd group south of Mahd adh Dhahab, and may be a Neoproterozoic glacial deposit<sup>243</sup>. The rest of the group consists of tholeiitic to calc-alkalic basalt, basaltic andesite, andesite, dacite, and rhyolite lavas and pyroclastic rocks, some of which were deposited in a subaerial environment, subordinate sandstone, siltstone, pebble conglomerate, and minor limestone. Contain host for the Jabal Sayid and Umm ad Damar volcanic-massive sulfide deposits and the Mahd adh Dhahab epithermal gold deposit.</p> | Accretionary complex and forearc invaded by arc                   |
| Sumayir Formation   | Tonian | Mafic volcanic and fine-grained sedimentary rocks intercalated with the Bi'r Umq mafic-ultramafic complex in the northeastern part of the Jiddah terrane: undivided basalt, chert, carbonate-altered mafic rocks (listwaenite), tuffite, and siltstone, and subordinate mafic-ultramafic intrusive rocks and is locally structurally intercalated with serpentinite.                                                                                                                                                                                                                                                                                                                                                                                                                                                                                                                                                                                                                                                                                                                                                                                                                                                                                                                                                                                                                                                                                                                                                                                                                                                                                                                                                                                                                                                                                                                                                                                                                                                                                                                                                                                                                                                                                                                                                                                                                                   | Ophiolite and epi-ophiolitic oceanic distal turbidites and cherts |

| Name                           | Age    | Brief Description                                                                                                                                                                                                                                                                                                                                                                                                                                                                                                                                                                                                                                                                                                                                                                                                                                                                                                                                                                                                                                                                                                                                               | Interpretation                           |
|--------------------------------|--------|-----------------------------------------------------------------------------------------------------------------------------------------------------------------------------------------------------------------------------------------------------------------------------------------------------------------------------------------------------------------------------------------------------------------------------------------------------------------------------------------------------------------------------------------------------------------------------------------------------------------------------------------------------------------------------------------------------------------------------------------------------------------------------------------------------------------------------------------------------------------------------------------------------------------------------------------------------------------------------------------------------------------------------------------------------------------------------------------------------------------------------------------------------------------|------------------------------------------|
| Muwayh Formation               | Tonian | Interbedded basaltic, andesitic, dacitic, and rhyolitic flows and tuffs, volcanoclastic conglomerate, sandstone, quartzite, calc-silicate rock, and ironstone metamorphosed to the greenschist facies. Intermediate to mafic lavas, agglomerate, breccia, and lithic-lapilli, crystal, and ash tuffs predominate. Dacite, rhyodacite, rhyolite, and felsic tuff form subordinate interbeds in parts of the formation particularly along its western margin. Rare white, blue, gray, and pink calcite-rich marble crops out as lenses of up to 200 m thick and as discontinuous hills surrounded by sabkha 40 km west-northwest of Al Muwayh. Fine- to medium-grained quartzite is exposed in lenses as much as 500 m long and 50 m wide in the area west of the Ash Shakhtaliyah shear zone.                                                                                                                                                                                                                                                                                                                                                                    | Magmatic arc that invaded a melange belt |
| Sarjuj Formation               | Tonian | Basalt and andesite flows, agglomerate, and volcanic breccia predominate. The flow rocks are mainly fine grained; porphyritic lava is rare. Agglomerate consists of andesite, basalt, and dacite fragments as much as 25 cm across in an andesitic matrix. Subordinate interbeds consist of felsic ash tuff, siltstone, and volcanic cobble-clast conglomerate, and rare flow-banded rhyolite and dacite lava.                                                                                                                                                                                                                                                                                                                                                                                                                                                                                                                                                                                                                                                                                                                                                  | Magmatic arc                             |
| Khadra Belt                    | Tonian | Andesite, dacite, pillow basalt, subordinate rhyolite, mafic and felsic tuffs, dioritic hypabyssal intrusions, polymict conglomerate with pebble to boulder clasts of plutonic as well as volcanic and sedimentary rocks, coarse-grained, pebbly volcanoclastic graywacke, siltstone, local carbonaceous siltstone, mudstone, and shale, thin ferruginous marble, and red and brown chert. South of Tathlith, adjacent to the Hamdah serpentinite, the unit contains phyllite, marble, graywacke, siltstone, greenstone, and amphibolite intermixed with blocks and lenses of serpentinite as much as 1,500 m thick. Amphibolite-grade rocks are present at contacts with granitoid intrusions and along shear zones as amphibolite, epidote-amphibole schist and gneiss, biotite schist, biotite-muscovite schist, biotite-hornblende-quartz schist, biotite gneiss, quartzofeldspathic schist, and marble. Along the Al Mulha fault zone, the rocks are granoblastic and include biotite-hornblende psammite, feldspathic psammite, biotite-hornblende schist, and pyroxene-bearing granofelses, described by ref. 221 as 'garnetiferous-pyroxene granulite'. | Accretionary complex invaded by arc      |
| Buwwah suite coeval with Bidah | Tonian | Plutonic rocks, which are approximately between 855-815 Ma. They include well-bedded to massive, fine-to-medium grained basaltic, andesitic, dacitic, and rhyolitic flows and tuffs, abundant volcanoclastic rocks, and significant amounts of epiclastic sedimentary rocks, and represent one or more volcanic arcs.                                                                                                                                                                                                                                                                                                                                                                                                                                                                                                                                                                                                                                                                                                                                                                                                                                           | Magmatic arc                             |
| Shwas Belt                     | Tonian | Flows and pyroclastic rocks of andesitic, dacitic, and basaltic compositions, green and red, feldspathic to lithic graywacke, tuff, flat-pebble-to-boulder conglomerate, and thin gray marble. They are metallogenically significant as the host rocks for VMS base metal and gold deposits                                                                                                                                                                                                                                                                                                                                                                                                                                                                                                                                                                                                                                                                                                                                                                                                                                                                     | Magmatic arc                             |

| Name         | Age    | Brief Description                                                                                                                                                                                                                                                                                                                                                                                                                                                                                                                                                                                                                                                                                                                                                                                                                                                                                                                                                                                                                                                                                                                                                                                                                                                                                                                                                                                                                                                                                                                                                                                                                                                                                                                                                                                                                                                                                                                                                                                                                   | Interpretation                      |
|--------------|--------|-------------------------------------------------------------------------------------------------------------------------------------------------------------------------------------------------------------------------------------------------------------------------------------------------------------------------------------------------------------------------------------------------------------------------------------------------------------------------------------------------------------------------------------------------------------------------------------------------------------------------------------------------------------------------------------------------------------------------------------------------------------------------------------------------------------------------------------------------------------------------------------------------------------------------------------------------------------------------------------------------------------------------------------------------------------------------------------------------------------------------------------------------------------------------------------------------------------------------------------------------------------------------------------------------------------------------------------------------------------------------------------------------------------------------------------------------------------------------------------------------------------------------------------------------------------------------------------------------------------------------------------------------------------------------------------------------------------------------------------------------------------------------------------------------------------------------------------------------------------------------------------------------------------------------------------------------------------------------------------------------------------------------------------|-------------------------------------|
| Tayyah Belt  | Tonian | <p>In the southern part of the belt include basalt in Wadi Baysh, and metasedimentary rocks in the vicinity of Sabya. The Wadi Baysh basalt, the type area for the Baish group referenced in the conventional literature on the shield, consists of tholeiitic basaltic flows and spilitic pillow basalt intercalated with minor discontinuous beds of metagraywacke, metachert, schist, and marble<sup>225</sup>. The rocks are regionally metamorphosed to the greenschist facies and locally metamorphosed to the amphibolite facies adjacent to intrusions. highly strained and include quartz-sericite schist, quartz-biotite-sericite schist, quartz-siderite-sericite schist, quartz-calcite-sericite schist, black carbonaceous slate, red slate, quartzite, metagraywacke, marble, and locally, kyanite-topaz-lazulite gneiss and andalusite-bearing hornfels. Where less deformed, the rocks are mapped as quartzite, quartz-pebble conglomerate, argillite, limestone, dolomite, graywacke, and sparse basalt. Elsewhere, the Tayyah-belt layered rocks consist of basaltic and andesitic flow rocks, commonly as pillow lava, flow breccia, and pyroclastic rocks interbedded with dacitic pyroclastic rocks, volcanoclastic conglomerate, coarse- to fine-grained graywacke, and phyllite. The volcanoclastic rocks are commonly carbonaceous and include thin layers of dark gray or brown marble and black chert. Local exposures of dacite and rhyolite flows together with tuffs, agglomerate, and volcanoclastic sediments are present at the north end of the structural belt. Amphibolite (tya) is common on the flanks of, and as roof pendants in, the Khamis Mushayt gneiss complex and adjacent to the Yemen border, where the rock is associated with paragneiss located on the flanks of foliated Nabitah-orogeny granite domes. The rocks are intruded by the 815-795 Ma An Nimas tonalite, trondhjemite, granodiorite, diorite, gabbro, local bodies of diorite-tonalite agmatite, and amphibolite.</p> | Accretionary complex invaded by arc |
| Malahah Belt | Tonian | <p>Mafic volcanic rocks are common in the northeastern part of the belt, in the vicinity of Wadi Wassat, comprising a sequence of basaltic and andesitic flows, breccias, agglomerates, and tuffs, interbedded with volcanoclastic graywacke, sandstone, and shale. To the southwest, dacitic flows and pyroclastic rocks and diabase sills and dikes are significant components of the assemblage, and in the south felsic pyroclastic and volcanoclastic rocks, largely metamorphosed to quartzofeldspathic sericite schist and chlorite-sericite schist, interlayered with pyritic carbonaceous graywacke and phyllite are abundant. Locally the rocks form amphibolite-grade paraschist and paragneiss. The volcanoclastic beds are locally graded and probably many were deposited as turbidites. The Malahah-belt assemblage is important as the host of large massive pyrite deposits (e.g. Wadi Wassat) and polymetallic VMS deposits (e.g. Al Masane)</p>                                                                                                                                                                                                                                                                                                                                                                                                                                                                                                                                                                                                                                                                                                                                                                                                                                                                                                                                                                                                                                                                  | Accretionary complex invaded by arc |

| Name                              | Age             | Brief Description                                                                                                                                                                                                                                                                                                                                                                                                                                                                 | Interpretation                      |
|-----------------------------------|-----------------|-----------------------------------------------------------------------------------------------------------------------------------------------------------------------------------------------------------------------------------------------------------------------------------------------------------------------------------------------------------------------------------------------------------------------------------------------------------------------------------|-------------------------------------|
| Bari granodiorite                 | Tonian          | Consists of medium -to-fine-grained biotite granodiorite that locally grades to tonalite and trondjemite.                                                                                                                                                                                                                                                                                                                                                                         | Magmatic arc                        |
| Ram Ram Complex                   | Tonian          | The small bimodal intrusions that consists of granodiorite, red granite, granophyre, gabbro and diorite.                                                                                                                                                                                                                                                                                                                                                                          | Magmatic arc                        |
| Hufayriyah Complex                | Tonian          | Irregular plutons of tonalite.                                                                                                                                                                                                                                                                                                                                                                                                                                                    | Magmatic arc                        |
| An Nimas Complex                  | Tonian          | Comprises tonalite, trondjemite, granodiorite, diorite, gabbro, local bodies of diorite-tonalite agmatite and amphibolite.                                                                                                                                                                                                                                                                                                                                                        | Magmatic arc                        |
| Western gneiss terranes           | Tonian          | The continuation of Afif and Asir terranes in Yemen and made of gneisses and schists, which are cut by granitic intrusions. The Afif terrane consists of monotonous orthogneisses of intercalated with arc-type pillow basalts, andesites and rhyolites. The Asir terrane consists of alternating belts of greenschist-grade volcanic and sedimentary rocks and high-grade gneisses <sup>18</sup> .                                                                               | Accretionary complex invaded by arc |
| Tsaliet Group                     | Tonian          | Andesite, lavas and tuffs, tuffaceous slates and greywackes of the Tsaliet Group.                                                                                                                                                                                                                                                                                                                                                                                                 | Accretionary complex invaded by arc |
| Didikama Formation                | Tonian?         | Slates and dolomites. Lower member of the Tambien Group. Occurrence of evaporite pseudomorphs in lower Didikama Formation dolomite was interpreted as $< 774.7 \pm 4.8 \text{ Ma}^{246}$ .                                                                                                                                                                                                                                                                                        | Forearc or intra-arc basin          |
| Matheos Formation                 | Tonian?         | Limestone with stromatolite dolomitic limestone, dolomite. Upper member of the Tambien Group. A section across the upper 1 km of the Tambien Group starts with the Didikama Formation at the bottom, which is extensively dolomitized and recrystallized pale-brown carbonates interbedded with siltstones. This transitions into well-preserved limestone ribbonite (micrite with ribbon-like laminations) with molar tooth structures of the Matheos Formation <sup>258</sup> . | Forearc or intra-arc basin          |
| <b>III. Nufud al- 'Urayq unit</b> |                 |                                                                                                                                                                                                                                                                                                                                                                                                                                                                                   |                                     |
| Abanat suite                      | upper Ediacaran | Alkali-rich, leucocratic, siliceous, high evolved and undeformed granites, which are generally exposed in the northern and northeastern part of the Arabian Shield.                                                                                                                                                                                                                                                                                                               | Magmatic arc                        |
| Ediacaran rhyolite                | upper Ediacaran | Rhyolite.                                                                                                                                                                                                                                                                                                                                                                                                                                                                         | Pull-apart basin product            |
| Jibalah Group                     | upper Ediacaran | Polymict conglomerate, arkosic sandstone, siltstone, well-bedded to stromatolitic limestone, shale, rhyolite and dacite lava, breccia, and tuff, and andesite lava and tuff; red, brown, purplish brown, or variegated gray-green and red                                                                                                                                                                                                                                         | Arc slivers                         |
| Malik granite                     | upper Ediacaran | Leucocratic medium-grained biotite monzogranite.                                                                                                                                                                                                                                                                                                                                                                                                                                  | Magmatic arc                        |
| Najirah granite                   | upper Ediacaran | Granite ranging in composition from tonalite to granodiorite to monzogranite.                                                                                                                                                                                                                                                                                                                                                                                                     | Magmatic arc                        |

| Name                            | Age             | Brief Description                                                                                                                                                                                                                                                                                                                                                                                                                                                                                                                                                                                                                                                                                                                                                                                                                                                                                                                                                                                                                                                                                                                                                                                                                                                                                                                                                                        | Interpretation           |
|---------------------------------|-----------------|------------------------------------------------------------------------------------------------------------------------------------------------------------------------------------------------------------------------------------------------------------------------------------------------------------------------------------------------------------------------------------------------------------------------------------------------------------------------------------------------------------------------------------------------------------------------------------------------------------------------------------------------------------------------------------------------------------------------------------------------------------------------------------------------------------------------------------------------------------------------------------------------------------------------------------------------------------------------------------------------------------------------------------------------------------------------------------------------------------------------------------------------------------------------------------------------------------------------------------------------------------------------------------------------------------------------------------------------------------------------------------------|--------------------------|
| Bani Ghayy Group                | lower Ediacaran | Clast-supported subangular to rounded cobble and boulder polymict conglomerate, tuffaceous graywacke sandstone and siltstone, and limestone. Conglomerate clasts are mainly locally derived from Siham-group volcanic and Siham-associated plutonic rocks, such as diorite, granodiorite, and granite, and from intraformational volcanic rocks. Sedimentary structures, including graded, cross- and planar laminated beds, are particularly common in the finer grained rocks and are interpreted as truncated Bouma cycles <sup>227</sup> . Thick sequences of white, gray, and brown calc-rudite, calc-arenite, oolitic limestone, stromatolitic limestone, dolomite, and calcareous sandstone and siltstone are conspicuous in several parts of the group <sup>259</sup> . The volcanic sequences, which are as much as 13,000 m thick <sup>222, 231</sup> , are an assemblage of porphyritic rhyolite <sup>17</sup> flows, sills, and tuffs, dacite, basalt, and andesite that, chemically, resemble present-day tholeiitic, high-alumina, and alkali basalts <sup>227</sup> or calc-alkalic and high-K calc-alkalic lavas transitional between continental-margin arcs and island arcs <sup>222</sup> . Volcaniclastic rocks include welded tuff, crystal and lapilli tuff, breccia, and agglomerate that are locally interbedded with and transitional to volcanic conglomerate. | Arc slivers              |
| Hadn Formation                  | lower Ediacaran | Rhyolitic to rhyodacitic ash-flow tuff, lesser amounts of massive rhyolite and rhyodacite flows, and rare dacitic, andesitic, and basaltic flows. Epiclastic rocks include arkosic sandstone and polymict conglomerate                                                                                                                                                                                                                                                                                                                                                                                                                                                                                                                                                                                                                                                                                                                                                                                                                                                                                                                                                                                                                                                                                                                                                                   | Magmatic arc             |
| Hibshi Formation                | lower Ediacaran | Undifferentiated conglomerate, arkose, volcanic arenite, lithic graywacke, and siltstone with subordinate mafic and felsic volcanic rocks. Felsic volcanic rocks are concentrated in the central part of the basin and are characterized by dacitic and rhyolitic welded and ash-fall tuff and dacitic and andesitic flow rocks and breccia. Mafic volcanic rocks in the northeast of the Hibshi outcrops consist of andesite flows, andesite tuff and agglomerate, subordinate graywacke, and minor conglomerate                                                                                                                                                                                                                                                                                                                                                                                                                                                                                                                                                                                                                                                                                                                                                                                                                                                                        | Extensional magmatic arc |
| Idah Suite                      | lower Ediacaran | Made of calc-alkalic plutons, which expose as broadly elliptical intrusions with the older rocks units and are largely undeformed, except where locally cataclased along fault zones.                                                                                                                                                                                                                                                                                                                                                                                                                                                                                                                                                                                                                                                                                                                                                                                                                                                                                                                                                                                                                                                                                                                                                                                                    | Magmatic arc             |
| Jurdawiyah Group                | lower Ediacaran | Folded and cut by numerous faults; polymict conglomerate, volcanic arenite, and andesite, dacite, rhyodacite, and rhyolite flows, tuffs, and agglomerate.                                                                                                                                                                                                                                                                                                                                                                                                                                                                                                                                                                                                                                                                                                                                                                                                                                                                                                                                                                                                                                                                                                                                                                                                                                | Arc slivers              |
| Syn- to post-Shammar intrusives | lower Ediacaran | Granite plutons spatially related to, and probably coeval with, rhyolite in the Shammar Group in the north-central part of the shield, including alkali-feldspar granite, alkali granite, syenogranite, monzogranite and granodiorite.                                                                                                                                                                                                                                                                                                                                                                                                                                                                                                                                                                                                                                                                                                                                                                                                                                                                                                                                                                                                                                                                                                                                                   | Magmatic arc             |
| Badwah granite                  | lower Ediacaran | Lenticular plutons of alkali-feldspar granite.                                                                                                                                                                                                                                                                                                                                                                                                                                                                                                                                                                                                                                                                                                                                                                                                                                                                                                                                                                                                                                                                                                                                                                                                                                                                                                                                           | Magmatic arc             |

| Name                          | Age                        | Brief Description                                                                                                                                                                                                                                                                                                                                                                                                                                                                                                                                                                                                                                                                                                                                                                                                                                                                                                                                                                                                                                                                                                              | Interpretation               |
|-------------------------------|----------------------------|--------------------------------------------------------------------------------------------------------------------------------------------------------------------------------------------------------------------------------------------------------------------------------------------------------------------------------------------------------------------------------------------------------------------------------------------------------------------------------------------------------------------------------------------------------------------------------------------------------------------------------------------------------------------------------------------------------------------------------------------------------------------------------------------------------------------------------------------------------------------------------------------------------------------------------------------------------------------------------------------------------------------------------------------------------------------------------------------------------------------------------|------------------------------|
| Gharamil monzogranite         | lower Ediacaran            | Non-foliated, coarse-grained monzogranite and subsidiary biotite-rich granodiorite.                                                                                                                                                                                                                                                                                                                                                                                                                                                                                                                                                                                                                                                                                                                                                                                                                                                                                                                                                                                                                                            | Magmatic arc                 |
| Ar Ruwaydah suite             | lower Ediacaran            | Consists of Khurs and Arwa granites with pale grey to white colour and absence of the tin-tungsten or niobium-lanthanum-rare-earth-element mineral occurrences. The Khurs granite is leucocratic monzogranite, subordinate syenogranite and biotite-muscovite aluminous granite, whereas the Arwa granite is a greyish-red porphyritic microgranite ring-dike.                                                                                                                                                                                                                                                                                                                                                                                                                                                                                                                                                                                                                                                                                                                                                                 | Magmatic arc                 |
| Al Khushaymiyah suite         | lower Ediacaran            | A group of massive, relatively undeformed, circular to concentric plutons that includes granodiorite, monzogranite, syenogranite and minor gabbro and diorite.                                                                                                                                                                                                                                                                                                                                                                                                                                                                                                                                                                                                                                                                                                                                                                                                                                                                                                                                                                 | Magmatic arc                 |
| Abbasiyah granodiorite        | lower Ediacaran            | Small plutons of biotite-hornblende granodiorite and minor monzogranite.                                                                                                                                                                                                                                                                                                                                                                                                                                                                                                                                                                                                                                                                                                                                                                                                                                                                                                                                                                                                                                                       | Magmatic arc                 |
| Younger Granites              | lower Ediacaran            | (In Ethiopia) Granite, diorite and quartz diorite.                                                                                                                                                                                                                                                                                                                                                                                                                                                                                                                                                                                                                                                                                                                                                                                                                                                                                                                                                                                                                                                                             | Magmatic arc                 |
| Shammar Group                 | lower Ediacaran to Tonian? | Rhyolite flow rock, ignimbrite, ash flow tuff, felsic breccias, basalt, and red-brown polymict conglomerate, sandstone, and siltstone.                                                                                                                                                                                                                                                                                                                                                                                                                                                                                                                                                                                                                                                                                                                                                                                                                                                                                                                                                                                         | Extensional magmatic arc     |
| Buqaya and Qarnayn formations | Cryogenian                 | Andesitic tuffs, breccias, and massive lavas, and basaltic sills and dikes. The felsic rocks include rhyolite porphyry, dacite, trachyte flows, thickly bedded lithic, lapilli, and welded ash-flow tuffs, and volcanic conglomerate and breccia; Sedimentary rocks are conspicuous in the central and eastern parts of the Bayda group outcrop area, and consist of interbedded sandstone and shale, in beds 1 cm-30 m thick, forming sandstone-shale units up to 1000 m thick, subordinate andesitic and felsic tuff, and purple sandstone, siltstone, and polymict conglomerate containing subrounded pebbles and cobbles of mafic and felsic volcanic rocks and granite. East and southeast of Bi'r al Bayda, the formation includes as much as 8000 m of lithic arenite and siltstone well-bedded in depositional units 10-30 cm thick, pebbly, well-bedded to massive volcanoclastic rocks, and local limestone. Sedimentary structures such as cross bedding, ripples, graded bedding, and mud cracks, and load casts are common. A magnetite-rich banded-iron formation is locally present in the vicinity of Shaghab. | Forearc basin invaded by arc |
| Laban and Kilab complexes     | Cryogenian                 | Heterogenous assemblage of biotite quartz diorite, lesser biotite and hornblende diorite, monzogabbro, and subordinate granodiorite, monzogranite and syenogranite.                                                                                                                                                                                                                                                                                                                                                                                                                                                                                                                                                                                                                                                                                                                                                                                                                                                                                                                                                            | Magmatic arc                 |
| Khishaybi Suite               | Cryogenian                 | Granite, granodiorite, tonalite and trondhjemite batholits.                                                                                                                                                                                                                                                                                                                                                                                                                                                                                                                                                                                                                                                                                                                                                                                                                                                                                                                                                                                                                                                                    | Magmatic arc                 |
| Rubayq Complex                | Cryogenian                 | Consists of strongly deformed granite and diorite exposed at the northeastern edge of the Arabian Shield. The complex includes biotite monzogranite grading to subordinate granodiorite and amphibolite-biotite diorite with abundant small mafic inclusions.                                                                                                                                                                                                                                                                                                                                                                                                                                                                                                                                                                                                                                                                                                                                                                                                                                                                  | Magmatic arc                 |



| Name                                      | Age                            | Brief Description                                                                                                                                                                                                                                                                                                                                                                                                                                                                                      | Interpretation                                             |
|-------------------------------------------|--------------------------------|--------------------------------------------------------------------------------------------------------------------------------------------------------------------------------------------------------------------------------------------------------------------------------------------------------------------------------------------------------------------------------------------------------------------------------------------------------------------------------------------------------|------------------------------------------------------------|
| Al Amar Group                             | Cryogenian                     | Andesitic tuff and breccia, andesite flow rock, well-bedded andesitic and rhyolitic tuff, welded rhyolitic tuff, minor calcareous dolomite and siltstone, and pyritic chert. The higher-grade rocks are phyllite, quartz-feldspar schist, biotite-amphibole schist, calc schist, amphibolite, amphibole and garnet-bearing paragneiss, and leucocratic quartz-feldspar gneiss. In places the metamorphosed rocks have lit-par-lit intrusions of tonalite and granodiorite, and grade into orthogneiss. | Forearc basin invaded by arc                               |
| Syn- to post-Al Amar intrusives           | Cryogenian                     | Tonalite, quartz diorite, diorite, gabbro, and minor trondhjemite.                                                                                                                                                                                                                                                                                                                                                                                                                                     | Magmatic arc                                               |
| Abu Dhira'ah and Ar Ridaniyah Formations  | Cryogenian                     | Intercalated quartz-feldspar schist, quartz schist, graphitic biotite schist, biotite-actinolite schist, biotite-muscovite schist, and leucocratic gneiss; jasper, biotite schist, amphibole schist, and marble. skarn minerals and hosts a Zn-Sn prospect.                                                                                                                                                                                                                                            | Accretionary complex                                       |
| Hadhaq Complex                            | Cryogenian                     | Monzogranite, diorite, tonalite and granodiorite gneiss.                                                                                                                                                                                                                                                                                                                                                                                                                                               | Magmatic arc                                               |
| Ar Rika Formaiton                         | Cryogenian                     | Greenschist-facies massive andesitic flow rocks, andesitic crystal and lapilli tuff, tuffite, local dacitic flows and tuffs, and minor sandstone, rhyolite, and volcanic breccia.                                                                                                                                                                                                                                                                                                                      | Magmatic arc                                               |
| Older Granites                            | Cryogenian                     | (In Ethiopia) Granodiorites and granites                                                                                                                                                                                                                                                                                                                                                                                                                                                               | Magmatic arc                                               |
| Haml suite: monzogranite and granodiorite | Cryogenian to lower Ediacaran? | Undeformed granites, including monzogranite-granodiorite. Granodiorite and monzogranite contain as much as 1% accessory magnetite.                                                                                                                                                                                                                                                                                                                                                                     | Magmatic arc                                               |
| Haml suite: Alkali-feldspar granite       | Cryogenian to lower Ediacaran? | Monzogranite and syenogranite.                                                                                                                                                                                                                                                                                                                                                                                                                                                                         | Magmatic arc                                               |
| Mughah Complex                            | Tonian                         | Well-banded paragneiss, amphibole gneiss and schist with or without garnet, sillimanite-bearing gneiss, actinolite-hornblende schist, sericite-chlorite schist, calc-silicate quartzite, and leucocratic gneiss. Protoliths are believed to include both mafic and felsic volcanic rocks as well as sedimentary rocks                                                                                                                                                                                  | Accretionary complex with possible ridge subduction record |
| Banana and Sufran Formations              | Tonian                         | The rocks are metamorphosed in the greenschist and locally amphibolite facies. Rock types include basalt, dacite, and rhyolite flows, flow breccia, and tuff, subordinate graywacke and conglomerate, and local hornblende-plagioclase paragneiss, quartz-plagioclase-biotite paragneiss, and hornblende-biotite-garnet paragneiss. Metamorphic foliation is commonly well developed but primary structures such as pillows in basalt are locally preserved                                            | Arc massif                                                 |
| Dhukhr Complex                            | Tonian                         | Tonalites, granodiorites, subordinate gabbros and trondhjemites <sup>220</sup> .                                                                                                                                                                                                                                                                                                                                                                                                                       | Magmatic arc                                               |
| Hulayfah Group                            | Tonian                         | Greenschist-facies basalt, andesite, dacite, rhyolite, tuffs, sandstone, shale, and small lenses of limestone                                                                                                                                                                                                                                                                                                                                                                                          | Magmatic arc                                               |

| Name                                                                | Age    | Brief Description                                                                                                                                                                                                                                                                                                                                                                                                                                                                                                                                  | Interpretation                      |
|---------------------------------------------------------------------|--------|----------------------------------------------------------------------------------------------------------------------------------------------------------------------------------------------------------------------------------------------------------------------------------------------------------------------------------------------------------------------------------------------------------------------------------------------------------------------------------------------------------------------------------------------------|-------------------------------------|
| Isamah Formation                                                    | Tonian | Basalt, andesite, and subordinate rhyolite flows, abundant felsic and mafic tuffs, commonly well bedded and cherty, and subordinate epiclastic sedimentary rocks including conglomerate, sandstone, and siltstone. The formation is notable for polymetallic and nickel-copper-bearing sulfide deposits at Nuqrah and Jabal Mardah.                                                                                                                                                                                                                | Magmatic arc                        |
| Syn- to post-Isamah formation intrusives                            | Tonian | Plutonic rocks that intrude the Isamah Formation, which are mainly intermediate in composition and include deformed and foliated igneous rocks such as diorite, tonalite, granodiorite and some granite.                                                                                                                                                                                                                                                                                                                                           | Magmatic arc                        |
| Jidh Suite                                                          | Tonian | Calc-alkalic intrusive rocks, compositionally including granodiorite, monzogranite, tonalite, diorite, and quartz diorite.                                                                                                                                                                                                                                                                                                                                                                                                                         | Magmatic arc                        |
| Dhiran, Nafi, and Hillit formations, Ajal Group, and Dukhnah gneiss | Tonian | Most of the rocks are amphibolite grade. Mafic granulite is locally present and other rocks are greenschist. The Dhiran formation consists of andesite and minor dacite. The Nafi formation, Hillit formation, and Dukhnah gneiss comprise chlorite schist, biotite schist, muscovite-garnet schist, quartzofeldspathic schist, amphibolite, rare calcareous beds, biotite gneiss, quartzfeldspar gneiss, and local mafic granulite. The Ajal group south of Halaban includes amphibolite, quartzofeldspathic gneiss, minor marble, and quartzite. | Accretionary complex invaded by arc |
| Silham Group                                                        | Tonian | Andesite, basalt, rhyolite, shale, lithic sandstone, conglomerate, quartzite, and marble. The proportions and thicknesses of these rocks vary from locality to locality.                                                                                                                                                                                                                                                                                                                                                                           | Magmatic arc                        |
| Tamran Formation                                                    | Tonian | Greenschist-facies andesitic agglomerate and lithic tuff, dacitic lithic-lapilli tuff, dacitic crystal tuff, and tuffaceous siltstone. Minor rock types include marble units as much as 100 m thick, jasper, and magnetite-bearing quartzite.                                                                                                                                                                                                                                                                                                      | Magmatic arc                        |
| Fuwayliq granodiorite                                               | Tonian | A small granodiorite intrusion adjacent to the Muhayil suite.                                                                                                                                                                                                                                                                                                                                                                                                                                                                                      | Magmatic arc                        |
| Sarjuj Formation                                                    | Tonian | Basalt and andesite flows, agglomerate, and volcanic breccia predominate. The flow rocks are mainly fine grained; porphyritic lava is rare. Agglomerate consists of andesite, basalt, and dacite fragments as much as 25 cm across in an andesitic matrix. Subordinate interbeds consist of felsic ash tuff, siltstone, and volcanic cobble-clast conglomerate, and rare flow-banded rhyolite and dacite lava                                                                                                                                      | Magmatic arc                        |
| Tays Formation and Kabid Paragneiss                                 | Tonian | Biotite-muscovite-quartz-oligoclase/andesine-garnet-sillimanite Granoblastic pelitic gneiss, quartz-oligoclase-biotite felsic gneiss, quartz-oligoclase-microcline-muscovite metaarkose, fine-grained quartz-feldspathic schist and locally, metaconglomerate. Small lenses of marble form a minor component of the map unit. Finely crystalline andesine-hornblende-garnet amphibolite probably represents metamorphosed mafic dikes. There are inherited zircons of Archaean and Palaeoproterozoic age.                                          | Accretionary complex                |
| Al-Mukalla island arc                                               | Tonian | Contains tuffs, feldspar porphyr lavas, volcanic breccias, rhyolites, basalts and quartz-feldspar porphyr dikes <sup>18</sup> .                                                                                                                                                                                                                                                                                                                                                                                                                    | Magmatic arc                        |

| Name                             | Age                          | Brief Description                                                                                                                                                                                                                                                                                                                                                                                                                                                                                                                                                                                                                                                                                                                                                                                                                                                                                                                                                                  | Interpretation                      |
|----------------------------------|------------------------------|------------------------------------------------------------------------------------------------------------------------------------------------------------------------------------------------------------------------------------------------------------------------------------------------------------------------------------------------------------------------------------------------------------------------------------------------------------------------------------------------------------------------------------------------------------------------------------------------------------------------------------------------------------------------------------------------------------------------------------------------------------------------------------------------------------------------------------------------------------------------------------------------------------------------------------------------------------------------------------|-------------------------------------|
| Tsaliet Group                    | Tonian                       | In Tigre and Eritrea, it is formed of metavolcanics ranging from basalts to dacites and rhyolites with predominance of andesites, and associated sediments: greywackes, agglomerates and slates. The metasediments bear evidence of shallow water origin, ripple marks, crossbedding, sun cracks etc. In the western and southern parts of the fold belt this unit is represented mainly by sediments of pelitic and semi-pelitic nature intercalated with occasional volcanic flows of andesitic or dacitic-rhyolitic composition. These rocks contain strongly deformed bodies of early diorites and granodiorites and large late or post-tectonic (batholithic) intrusions of granites and granodiorites <sup>215</sup> . A synthesis of available crystallization ages (mainly zircon U-Pb and Pb-Pb) on Tsaliet arc crust shows that igneous activity occurred mainly at 820-740 Ma, but older ~850 Ma arc volcanics occur in neighbouring Eritrea <sup>138, 205, 241</sup> . | Accretionary complex invaded by arc |
| Syn- to post-Hulayfah intrusives | Tonian - Cryogenian boundary | Consists of plutons of monzogranite, granodiorite and diorite that intrude the Hulayfah Group.                                                                                                                                                                                                                                                                                                                                                                                                                                                                                                                                                                                                                                                                                                                                                                                                                                                                                     | Magmatic arc                        |
| <b>IV. Baranis Uweinat Unit</b>  |                              |                                                                                                                                                                                                                                                                                                                                                                                                                                                                                                                                                                                                                                                                                                                                                                                                                                                                                                                                                                                    |                                     |
| Post-Hammamat Felsites           | upper Ediacaran              | Intrusion of felsite bodies, sheets, plugs and breccia. Their field relation with Younger Granites is uncertain <sup>214</sup> . In many places, the felsites have intrusive relations with the Hammamat sediments, and in turn were introduced by the younger granites. However, ref. 261 mention that there is no clear field relation between the felsites and the Hammamat sediments in the north Eastern Desert. According to ref. 218, field evidence and chemistry indicate that the felsites might be directly related to or comagmatic with the younger granites. According to the limited chemistry available, the felsites are considered to include Fe-poor alkaline rhyolite and rhyodacites <sup>262</sup> . Their age, being post-Dokhan and is less probably less than 580 Ma <sup>260</sup> .                                                                                                                                                                     | Magmatic arc                        |
| Shayma Nasir Group               | upper Ediacaran              | Polymict conglomerate; basaltic, andesitic, dacitic, and rhyolitic lava, tuff, and agglomerate; and red-brown arkosic, volcanoclastic, and calcareous sandstone                                                                                                                                                                                                                                                                                                                                                                                                                                                                                                                                                                                                                                                                                                                                                                                                                    | Magmatic arc                        |
| Jibalah Group                    | upper Ediacaran              | Polymict conglomerate, arkosic sandstone, siltstone, well-bedded to stromatolitic limestone, shale, rhyolite and dacite lava, breccia, and tuff, and andesite lava and tuff; red, brown, purplish brown, or variegated gray-green and red                                                                                                                                                                                                                                                                                                                                                                                                                                                                                                                                                                                                                                                                                                                                          | Arc slivers                         |
| Radwa granite                    | upper Ediacaran              | Circular to semi-circular plutons of alkali and alkali-feldspar granite.                                                                                                                                                                                                                                                                                                                                                                                                                                                                                                                                                                                                                                                                                                                                                                                                                                                                                                           | Magmatic arc                        |
| Khuls granite                    | upper Ediacaran              | The circular to elongate plutons of medium- to coarse-grained hornblende-biotite monzogranite, granodiorite, and subordinate syneogranite. The suite is lithologically similar to Admar suite, but they are younger.                                                                                                                                                                                                                                                                                                                                                                                                                                                                                                                                                                                                                                                                                                                                                               | Magmatic arc                        |

| Name             | Age             | Brief Description                                                                                                                                                                                                                                                                                                                                                                                                                                                                                                                                                                                                                                                                                                                                                                                                                                                                                                                                                                                                                                                                                                                                                                                                                                                                                                                                                                                                                                                                     | Interpretation                                                  |
|------------------|-----------------|---------------------------------------------------------------------------------------------------------------------------------------------------------------------------------------------------------------------------------------------------------------------------------------------------------------------------------------------------------------------------------------------------------------------------------------------------------------------------------------------------------------------------------------------------------------------------------------------------------------------------------------------------------------------------------------------------------------------------------------------------------------------------------------------------------------------------------------------------------------------------------------------------------------------------------------------------------------------------------------------------------------------------------------------------------------------------------------------------------------------------------------------------------------------------------------------------------------------------------------------------------------------------------------------------------------------------------------------------------------------------------------------------------------------------------------------------------------------------------------|-----------------------------------------------------------------|
| Younger Granites | lower Ediacaran | Pink to red and form a suite of isolated plutons, which are epizonal and unfoliated, and have sharp contacts with all surrounding rock types. Equidimensional to moderately elongate bodies. Most bodies consist almost entirely of quartz, K-feldspar and sodic plagioclase. The more mafic bodies contain moderate amounts of biotite and hornblende. Can be grouped into three: (a) Group I: Most felsic and characterized by fewer mafic and more aplitic dikes than others, Very high Rb, High Y, Nb, Low Zr, Very Low Ba, Sr (b) Group II: Varied dikes, Low Sr, (c) Mostly mafic dikes, Very high Ba, High Sr, Zr, Low Rb, Y, Nb <sup>218</sup> . Or; Group I: less differentiated calc-alkaline to weakly alkaline I-type granodiorite and monzogranite, Group II: normal alkaline A-type monzogranite to syenite, and Group III: strongly alkaline A-type alkali feldspar granite <sup>236</sup> .                                                                                                                                                                                                                                                                                                                                                                                                                                                                                                                                                                           | Magmatic arc                                                    |
| Younger Gabbro   | lower Ediacaran | There are at least two different gabbroic assemblages, especially in the Central Eastern Desert (metagabbros "MG" and younger gabbro "YG"), which have distinct geochemical differences between their amphiboles. The amphiboles of the MG are mainly magnesio-hornblende with subordinate actinolitic hornblende, whereas, the YG amphiboles are edenitic hornblende in composition. The Al and Ti contents of the amphibole of the MG indicate that these rocks are subjected to low pressure metamorphism within the greenschist-amphibolite facies <sup>234</sup> . In terms of intrusions in Nubia, the sequence is (1) older gabbro (or metagabbro), (2) older granite, (3) younger gabbro, and (4) younger granite. The structural evolution is interpreted to be characterized by early NW-directed transport that formed several major thrusts in the belt. This event is correlated with the main deformation event in the Eastern Desert, elsewhere known as D2. During this event the regional fabric of the Wadi Mubarak belt was wrapped around the El Umra granite complex in a west-east orientation. This event is related to the formation of the Najd Fault System <sup>157</sup> . Recent studies classify gabbroic rocks into three major groups: (I) the metagabbro-diorite-tonalite association (900-800 Ma) <sup>238, 250</sup> , (II) the ophiolitic metagabbros (780-730 Ma) <sup>256, 257</sup> , (III) younger gabbros (655-570 Ma) <sup>249, 248</sup> . | Ophiolite and ocean floor turbidites in an accretionary complex |
| Habid Formation  | lower Ediacaran | Nonmetamorphosed, gently dipping greywacke, siltstone, polymict conglomerate and rare tuff <sup>229</sup> . Cross bedding, ripple marks, and mudcracks are common.                                                                                                                                                                                                                                                                                                                                                                                                                                                                                                                                                                                                                                                                                                                                                                                                                                                                                                                                                                                                                                                                                                                                                                                                                                                                                                                    | Forearc basin sliced by arc shaving faults                      |
| Rithmah Complex  | lower Ediacaran | Small, circular and discordant plutons, some of which are layered and include quartz diorite and subordinate gabbro, granodiorite, and tonalite.                                                                                                                                                                                                                                                                                                                                                                                                                                                                                                                                                                                                                                                                                                                                                                                                                                                                                                                                                                                                                                                                                                                                                                                                                                                                                                                                      | Magmatic arc                                                    |
| Suwaylih suite   | lower Ediacaran | The undeformed circular to elongate syenitic plutons.                                                                                                                                                                                                                                                                                                                                                                                                                                                                                                                                                                                                                                                                                                                                                                                                                                                                                                                                                                                                                                                                                                                                                                                                                                                                                                                                                                                                                                 | Magmatic arc                                                    |

| Name           | Age        | Brief Description                                                                                                                                                                                                                                                                                                                                                                                                                                                                                                                                                                                                                                                                                                                                          | Interpretation                                                                |
|----------------|------------|------------------------------------------------------------------------------------------------------------------------------------------------------------------------------------------------------------------------------------------------------------------------------------------------------------------------------------------------------------------------------------------------------------------------------------------------------------------------------------------------------------------------------------------------------------------------------------------------------------------------------------------------------------------------------------------------------------------------------------------------------------|-------------------------------------------------------------------------------|
| Older Granites | Cryogenian | Grey granite or older granite; are mainly represented by tonalites, monzodiorites and qz-monzodiorites, which are derived from calc-alkaline melamunious to prealuminous I-type magma and were emplaced under prevailing compressional regime <sup>237</sup> . The age determined for older granodiorite is 652.5+/- 2.6 Ma <sup>123</sup> .                                                                                                                                                                                                                                                                                                                                                                                                               | Magmatic arc                                                                  |
| Metasediments  | Cryogenian | A three-fold stratigraphy is preserved in the basement of the Central Eastern Desert of Egypt. A basal section of oceanic crust includes ultramafics, gabbros and pillowed basalts. These older metavolcanics are conformably succeeded by dominantly andesitic, calc-alkaline sequence of younger volcanics. The OMV and YMV are largely restricted to the the Central Eastern Desert, but analogous terranes are found in northern Arabia <sup>68</sup> .                                                                                                                                                                                                                                                                                                | Accretionary complex invaded by arc                                           |
| Metavolcanics  | Cryogenian | Intermediate to felsic metavolcanics and metapyroclastics, which partly includes ophiolitic basic metavolcanics in places.                                                                                                                                                                                                                                                                                                                                                                                                                                                                                                                                                                                                                                 | Magmatic arc                                                                  |
| Al-Ays Group   | Cryogenian | Basaltic to rhyolitic flows, breccias, and tuffs, and an abundance of well-bedded volcanoclastic and epiclastic sedimentary rocks. Marble is locally present. Sedimentary structures, including ripple marks and grading, are locally present. The rocks are polydeformed and metamorphosed in the greenschist facies.                                                                                                                                                                                                                                                                                                                                                                                                                                     | Forearc close to the arc axis                                                 |
| Thalbah Group  | Cryogenian | Pebble to cobble polymict conglomerate at the base and higher in the succession, well-bedded purple and green lithic arenite and siltstone. The clasts are derived from the underlying terrane-forming rocks of the Midyan terrane                                                                                                                                                                                                                                                                                                                                                                                                                                                                                                                         | Either part of a forearc or Post-amalgamation sedimentary basin (?pull-apart) |
| Zaam Group     | Cryogenian | Crudely bedded to massive and pillowed basalt and andesite, mafic tuff and agglomerate, dacitic and rhyolitic flows and tuffs, massive to well bedded volcanoclastic sandstone or lithic arenite, siltstone, shale, pyritic and graphitic shale, black chert, and minor limestone and marble. Graded bedding, load casts, and slump structures are common. A distinctive rock type is diamictite composed of small angular fragments of quartz and feldspar, isolated well-rounded pebbles, cobbles, and boulders of sandstone, rhyolite, limestone, and granite, and rafts up to several tens of meters across of sandstone, limestone and limestone breccia floating in massive argillaceous sediment. The formation is between 1000 m and 4500 m thick. | Accretionary complex invaded by arc                                           |
| Hadiyah Group  | Cryogenian | 2000 m of massive to pillowed andesitic and basaltic lava, subordinate volcanic sandstone, fine-grained volcanic breccia and conglomerate, and minor felsic tuff, overlain by 3000 m of matrix-supported sandstone (diamictite), medium- to thin-bedded sandstone, and minor limestone that passes up into red and maroon sandstone and siltstone, greenish sandstone and siltstone, and, at the top, 2000 m of polymict conglomerate, gray to red arkosic sandstone, volcanic sandstone, and red siltstone and mudstone. Contacts are sharp to gradational                                                                                                                                                                                                | Magmatic arc                                                                  |

| Name                              | Age        | Brief Description                                                                                                                                                                                                                                                                                                                                                                                                                                                                                                                                                                                                                                                                                                                                                                                                                                                                                                                                                                                                                                                                                                                                                                                                                                                                                                                                   | Interpretation                      |
|-----------------------------------|------------|-----------------------------------------------------------------------------------------------------------------------------------------------------------------------------------------------------------------------------------------------------------------------------------------------------------------------------------------------------------------------------------------------------------------------------------------------------------------------------------------------------------------------------------------------------------------------------------------------------------------------------------------------------------------------------------------------------------------------------------------------------------------------------------------------------------------------------------------------------------------------------------------------------------------------------------------------------------------------------------------------------------------------------------------------------------------------------------------------------------------------------------------------------------------------------------------------------------------------------------------------------------------------------------------------------------------------------------------------------|-------------------------------------|
| Furayh Group                      | Cryogenian | In the east, the group includes as much as 6000 m of green and purple shale, siltstone, volcanoclastic sandstone, graywacke, and subordinate limestone; cobble to boulder polymict conglomerate containing clasts of granophyre, siltstone, chert, andesite, and quartz; rhyolite, andesite, and dacite flows, and rhyolite breccia, tuff, and ignimbrite. West of Harrat Rahat, volcanic rocks are more abundant and the group contains several thousand meters of andesite and basalt flows, breccia, and tuffs, subordinate dacite and rhyolite, and interbeds of sandstone and local conglomerate.                                                                                                                                                                                                                                                                                                                                                                                                                                                                                                                                                                                                                                                                                                                                              | Forearc basin invaded by arc        |
| Admar suite                       | Cryogenian | Consists of a cluster of small to large, irregular- to subcircular-shaped granitoid intrusions, including granophyre, monzogranite, syenogranite, granodiorite, and subordinate tonalite and alkali-feldspar granite.                                                                                                                                                                                                                                                                                                                                                                                                                                                                                                                                                                                                                                                                                                                                                                                                                                                                                                                                                                                                                                                                                                                               | Magmatic arc                        |
| Shufayyah Complex                 | Cryogenian | The complex includes granodiorite, tonalite, diorite and gabbro.                                                                                                                                                                                                                                                                                                                                                                                                                                                                                                                                                                                                                                                                                                                                                                                                                                                                                                                                                                                                                                                                                                                                                                                                                                                                                    | Magmatic arc                        |
| Subh suite                        | Cryogenian | They are similar to Radwa granite, but differs in its irregular form.                                                                                                                                                                                                                                                                                                                                                                                                                                                                                                                                                                                                                                                                                                                                                                                                                                                                                                                                                                                                                                                                                                                                                                                                                                                                               | Magmatic arc                        |
| Khanzirah complex                 | Cryogenian | Made of biotite-muscovite monzogranite and granophyre that also include monzogranite and syenogranite.                                                                                                                                                                                                                                                                                                                                                                                                                                                                                                                                                                                                                                                                                                                                                                                                                                                                                                                                                                                                                                                                                                                                                                                                                                              | Magmatic arc                        |
| Medium to High Grade Metamorphics | Tonian     | In various places, medium-to-high grade metamorphics may include (a) biotite gneisses, diopside-hornblende gneisses, meta-quartzites, noritic to granulitic gneisses, garnet-granulitic gneisses, calc-silicates (Jebel Uweinat) <sup>217</sup> , (b) blastomylonites (SE of Jebel Uweinat) <sup>263</sup> , (c) granitic gneisses, often migmatitic, amphibolites, diopside-hornblende gneisses, anatectic granitoids (SE of Jebel Uweinat) <sup>217</sup> , (d) (Granoblastite Formation) gneissic granulites and granoblastites, meta-quartzites, serpentinites, amphibolites, pyroxenites, metagabbro norites (western part of Jebel Kamil, east of Jebel Uweinat and around Jebel Kissu) <sup>180, 228</sup> , (e) (Anatextite Formation) migmatitic gneisses, metaxites, nebulitic diatexites, marbles, calc-silicates, amphibolites (east of Jebel Kamil) <sup>180, 228</sup> , (f) hornblende gneisses, biotite gneisses, etc (NW Sudan) <sup>180, 228</sup> , (g) granitic to tonalitic gneisses, often migmatized, amphibolites, marbles, calc-silicates (all areas in S Egypt and N Sudan) <sup>223, 264</sup> (from ref. 158). Samples from Gebel El Asr and Gebel Kamil (gabbroic anorthosite and anorthosite, respectively) are fine-to-medium grained, weakly banded and exhibit well developed granoblastic texture <sup>52</sup> . | Accretionary complex invaded by arc |

| Name                           | Age                   | Brief Description                                                                                                                                                                                                                                                                                                                                                                                                                                                                                                                                                                                                                                                                                                                                                                                                                                                                                                                                                                                                                                                                                                                        | Interpretation                                               |
|--------------------------------|-----------------------|------------------------------------------------------------------------------------------------------------------------------------------------------------------------------------------------------------------------------------------------------------------------------------------------------------------------------------------------------------------------------------------------------------------------------------------------------------------------------------------------------------------------------------------------------------------------------------------------------------------------------------------------------------------------------------------------------------------------------------------------------------------------------------------------------------------------------------------------------------------------------------------------------------------------------------------------------------------------------------------------------------------------------------------------------------------------------------------------------------------------------------------|--------------------------------------------------------------|
| Serpentinite                   | Tonian                | Ophiolitic serpentinite, talc carbonate & related rocks; The Wadi-Semna serpentinites are composed essentially of antigorite, chrysotile, and lizardite, with minor carbonate, chromite, magnetite, magnesite and chlorite, and they were tectonically emplaced. Major-element compositions indicate that except, for the addition of water, the serpentinites have not been experienced extensive element mobility; these were originally CaO- and Al <sub>2</sub> O <sub>3</sub> -depleted harzburgites similar to peridotites from modern oceanic forearcs <sup>12</sup> .                                                                                                                                                                                                                                                                                                                                                                                                                                                                                                                                                            | Accretionary complex                                         |
| Milhah Formation               | Tonian                | Massive basalt, subordinate rhyolite subvolcanic intrusions, sandstone, shale, conglomerate, mafic tuff, and minor limestone                                                                                                                                                                                                                                                                                                                                                                                                                                                                                                                                                                                                                                                                                                                                                                                                                                                                                                                                                                                                             | Magmatic arc or possibly ocean floor in accretionary complex |
| Birak Group                    | Tonian                | Greenschist-facies basaltic, andesitic, dacitic, and rhyolitic flows and pyroclastic rocks (agglomerate, lapilli tuff, and ash tuff), graywacke, marble, quartzite, and chert. In places, the rocks are schistose. Chert is thinly bedded to finely laminated. White to banded pale gray and white marble is conspicuous at Jabal Farasan.                                                                                                                                                                                                                                                                                                                                                                                                                                                                                                                                                                                                                                                                                                                                                                                               | Accretionary complex invaded by arc                          |
| Al Qunah Formation             | Tonian                | Andesite, basalt, rhyolite, shale, lithic sandstone, conglomerate, quartzite, and marble. The proportions and thicknesses of these rocks vary from locality to locality                                                                                                                                                                                                                                                                                                                                                                                                                                                                                                                                                                                                                                                                                                                                                                                                                                                                                                                                                                  | Immature magmatic arc                                        |
| Metagabbro-Metadiorite Complex | Tonian to Cryogenian? | In south Sinai, on the basis of petrography and mineral chemistry, there are three rock types: (1) pyroxene hornblende gabbros, (2) hornblende gabbros, and (3) diorites). The bulk-rock chemistry and the microprobe analyses of pyroxenes reveal a subalkaline magma generated in an island arc environment for the present metagabbro-diorite complex. K-Ar age dating of the hornblendes and biotites yield 794 ±30 - 667±25 Ma age <sup>238</sup> .                                                                                                                                                                                                                                                                                                                                                                                                                                                                                                                                                                                                                                                                                 | Accretionary complex                                         |
| Nafirdeib and Odi series       | Tonian?               | Both series are made up of sedimentary volcanic complex. The metasedimentary volcanic rocks are of the greenschist facies with basic and ultrabasic intrusions, and calc-alkali batholith granitoids. The Odi Series is made up of a variety of metamorphic schists, marbles, quartzites with rare intercalations of amphibolites and greenstone effusive rocks. The Nafirdeib Series is mainly made up of basic to intermediate altered effusive rocks and tuffs with intercalating siliceous schists, marbles and graywackes. In the upper part of the series, the sedimentary rocks are more common with intercalations of tuffs and basic greenstone effusive rocks. The Odi and Nafirdeib Series are correlated with the Abu Zeran and Atalla Series in Egypt, Abu Baish Halaban and Hali Series in Saudi Arabia, Mormora and Txaliet Series in Ethiopia. Rocks of both series are deformed to linear folds, but the Odi Series is more intensely folded (isoclinal, often overturned folds) <sup>224</sup> . Ten limited number of zircons suggest ages between 840 and 880 Ma from a rhyolite at the Aquaba Pass <sup>121</sup> . | Accretionary complex invaded by arc                          |

| Name                               | Age             | Brief Description                                                                                                                                                                                                                                                                                                                                                                                                                                                                                                                                                                                                                                                                                                                                                                                                                                                                                                                                                                                     | Interpretation                      |
|------------------------------------|-----------------|-------------------------------------------------------------------------------------------------------------------------------------------------------------------------------------------------------------------------------------------------------------------------------------------------------------------------------------------------------------------------------------------------------------------------------------------------------------------------------------------------------------------------------------------------------------------------------------------------------------------------------------------------------------------------------------------------------------------------------------------------------------------------------------------------------------------------------------------------------------------------------------------------------------------------------------------------------------------------------------------------------|-------------------------------------|
| <b><i>IVa. Tibesti Unit</i></b>    |                 |                                                                                                                                                                                                                                                                                                                                                                                                                                                                                                                                                                                                                                                                                                                                                                                                                                                                                                                                                                                                       |                                     |
| Super Tibestian Magmatic Series    | upper Ediacaran | The Super Tibestian magmatic Series includes batholithic calc-alkalic and syntectonic gabbro to granites in the Jabal Eghei area, at other locations in the eastern Tibesti area, and in the Bin Ghanimah batholith. The Super Tibestian magmatic series intrudes the Lower Tibestian series in the eastern Tibesti (Jabal Eghei area and rocks in the southeast of the Tibesti massif) and the Upper Tibestian series in the western Tibesti (Bin Ghanimah batholith). The Super Tibestian magmatic series of the Jabal Eghei area becomes more siliceous toward the East. The Bin Ghanimah batholith becomes more siliceous towards the west. All suites contain typically calc-alkalic mineralogy <sup>21</sup> .                                                                                                                                                                                                                                                                                  | Magmatic arc                        |
| Upper Tibestian Metamorphic Series | Cryogenian      | The Upper Tibestian Series consists of low greenschist-facies siliceous schists and quartzites with conglomerates, interbedded greywackes and arkoses, and interbeds of rhyolitic lavas with schists. The Upper Tibestian Series extends west across the entire Tibesti massif to the Bin Ghanimah batholith <sup>21</sup> .                                                                                                                                                                                                                                                                                                                                                                                                                                                                                                                                                                                                                                                                          | Accretionary complex invaded by arc |
| Lower Tibestian Metamorphic Series | Tonian?         | The Lower Tibestian Metamorphic Series is exposed along the eastern part of the Tibesti Massif. It contains highly metamorphosed sedimentary and intercalated basic volcanic rocks in upper greenschist to lower almandine amphibolite facies. An abundance of basic metavolcanics causes Lower Tibestian series to have a higher magnetic intensity than the Upper Tibestian Series. Major rock types include: gneisses, amphibolites, mica-schists, staurolite-garnet-mica-schists, and hornblende-mica-schists, graphite schists and calc-silicates and marbles. The amphibolites are probably mafic metavolcanic rocks. Serpentinites occur partly as small pods as veins within epidote boudins in metavolcanics, which may represent oceanic crust. Carbonate rocks occur to the west and are interbedded with mica schist and pyroclastics. Metaconglomerates at the top of the Lower Tibestian Series contain cobbles of granite, amphibolite, quartzite, gneiss and rhyolite <sup>21</sup> . | Accretionary complex invaded by arc |
| <b><i>IVb.</i></b>                 |                 |                                                                                                                                                                                                                                                                                                                                                                                                                                                                                                                                                                                                                                                                                                                                                                                                                                                                                                                                                                                                       |                                     |
| Upper Tibestian Metamorphic Series | Cryogenian      | The Upper Tibestian Series consists of low greenschist-facies siliceous schists and quartzites with conglomerates, interbedded greywackes and arkoses, and interbeds of rhyolitic lavas with schists.                                                                                                                                                                                                                                                                                                                                                                                                                                                                                                                                                                                                                                                                                                                                                                                                 | Accretionary complex invaded by arc |
| <b><i>V. Midian-Liya unit</i></b>  |                 |                                                                                                                                                                                                                                                                                                                                                                                                                                                                                                                                                                                                                                                                                                                                                                                                                                                                                                                                                                                                       |                                     |
| Ediacaran rhyolite                 | upper Ediacaran | Rhyolite.                                                                                                                                                                                                                                                                                                                                                                                                                                                                                                                                                                                                                                                                                                                                                                                                                                                                                                                                                                                             | Pull-apart basin product            |
| Jibalah Group                      | upper Ediacaran | Polymict conglomerate, arkosic sandstone, siltstone, well-bedded to stromatolitic limestone, shale, rhyolite and dacite lava, breccia, and tuff, and andesite lava and tuff; red, brown, purplish brown, or variegated gray-green and red                                                                                                                                                                                                                                                                                                                                                                                                                                                                                                                                                                                                                                                                                                                                                             | Arc slivers                         |



| Name                      | Age             | Brief Description                                                                                                                                                                                                                                                                                                                                                                                                                                                                                                                                                                                                                                                                                                                                                                                                                                                                                                           | Interpretation                          |
|---------------------------|-----------------|-----------------------------------------------------------------------------------------------------------------------------------------------------------------------------------------------------------------------------------------------------------------------------------------------------------------------------------------------------------------------------------------------------------------------------------------------------------------------------------------------------------------------------------------------------------------------------------------------------------------------------------------------------------------------------------------------------------------------------------------------------------------------------------------------------------------------------------------------------------------------------------------------------------------------------|-----------------------------------------|
| Younger Granites          | lower Ediacaran | (In Egypt) Pink to red and form a suite of isolated plutons, which are epizonal and unfoliated, and have sharp contacts with all surrounding rock types. Equidimensional to moderately elongate bodies. Most bodies consist almost entirely of quartz, K-feldspar and sodic plagioclase. The more mafic bodies contain moderate amounts of biotite and hornblende. Can be grouped into three: (a) Group I: Most felsic and characterized by fewer mafic and more aplitic dikes than others, Very high Rb, High Y, Nb, Low Zr, Very Low Ba, Sr (b) Group II: Varied dikes, Low Sr, (c) Mostly mafic dikes, Very high Ba, High Sr, Zr, Low Rb, Y, Nb <sup>218</sup> . Or; Group I: less differentiated calc-alkaline to weakly alkaline I-type granodiorite and monzogranite, Group II: normal alkaline A-type monzogranite to syenogranite, and Group III: strongly alkaline A-type alkali feldspar granite <sup>236</sup> . | Accretionary complex invaded by arc     |
| Dokhan volcanics          | lower Ediacaran | The major and trace elements of lavas from Wadi Um Sidra and Um Asmer suggest from medium- to high-K basalt to rhyolite. They comprise voluminous medium- to high-K calc-alkaline lavas, subordinate adakitic lavas and minor alkali basalts (242).                                                                                                                                                                                                                                                                                                                                                                                                                                                                                                                                                                                                                                                                         | Magmatic arc                            |
| Hammamat Clastics         | lower Ediacaran | Made of Shihimiya and Igla formations. Dark greywackes, coarse conglomerates, green-grey siltstones, minor subgreywacke and conglomerates, purple hematitic siltstone, subgreywacke, minor arenite, conglomerate and intraformational breccia (from up to the bottom). Hematites, rich in Igla Formation, are most probably related to the older volcanics (Dokhan volcanics) that are exceptionally rich in iron <sup>214</sup> . Sediments are derived from 30% mafic rocks, 25% granodiorite, 25% intermediate volcanic rocks and 20% felsic volcanic rocks; but at Wadi Bali it is 90% intermediate and 10% felsic volcanic rocks <sup>239</sup> .                                                                                                                                                                                                                                                                      | Forearc or intra-arc basin              |
| Katherine Ring Complex    | lower Ediacaran | The complex includes Katherine volcanics, subvolcanic bodies, ring dykes and granitic pluton. The Katherine volcanics are essentially composed of rhyolites, ignimbrite, volcanic breccia and tuffs. Mineralogically, the prealkaline rhyolites contain sodic amphiboles and aegirine <sup>252</sup> .                                                                                                                                                                                                                                                                                                                                                                                                                                                                                                                                                                                                                      | Magmatic arc                            |
| Hinshan Formation         | Cryogenian      | Intermediate to felsic volcanic and sedimentary rocks, metamorphosed to the greenschist facies, and includes andesitic lava and tuffs, rhyolitic flow rock and welded tuff, subordinate basalt, and well-bedded and locally graded wacke, siltstone, and shale.                                                                                                                                                                                                                                                                                                                                                                                                                                                                                                                                                                                                                                                             | Magmatic arc                            |
| Qazaz granite super suite | Cryogenian      | Predominantly monzogranite, but individual plutons also contain granodiorite, diorite, syenogranite and local gabbro.                                                                                                                                                                                                                                                                                                                                                                                                                                                                                                                                                                                                                                                                                                                                                                                                       | Magmatic arc                            |
| Muwaylih Suite            | Cryogenian      | Mafic plutons that intrude into the granodiorites. They are variably deformed and metamorphosed. The main rock types are tonalite, trondhjemitic, diorite, quartz diorite, gabbro and norite. Granodiorite, monzogranite, and serpentinite are locally present.                                                                                                                                                                                                                                                                                                                                                                                                                                                                                                                                                                                                                                                             | Magmatic arc                            |
| Zaytah Formation          | Cryogenian      | Conglomerate and sedimentary breccia, immature sandstone, graywacke, siltstone, shale and minor amounts of quartzite. Subordinate lithologies, mainly developed toward the top of the succession, include andesite, felsic tuff, and porphyritic felsite.                                                                                                                                                                                                                                                                                                                                                                                                                                                                                                                                                                                                                                                                   | Forearc basin fill later invaded by arc |

| Name                       | Age                            | Brief Description                                                                                                                                                                                                                                                                                                                                                                                                                                                                                                                                                                                                                                                                                                                                                                                                                                                                                                                                                                                                                                                                                                              | Interpretation                      |
|----------------------------|--------------------------------|--------------------------------------------------------------------------------------------------------------------------------------------------------------------------------------------------------------------------------------------------------------------------------------------------------------------------------------------------------------------------------------------------------------------------------------------------------------------------------------------------------------------------------------------------------------------------------------------------------------------------------------------------------------------------------------------------------------------------------------------------------------------------------------------------------------------------------------------------------------------------------------------------------------------------------------------------------------------------------------------------------------------------------------------------------------------------------------------------------------------------------|-------------------------------------|
| Bayda Group                | Cryogenian                     | Andesitic tuffs, breccias, and massive lavas, and basaltic sills and dikes. The felsic rocks include rhyolite porphyry, dacite, trachyte flows, thickly bedded lithic, lapilli, and welded ash-flow tuffs, and volcanic conglomerate and breccia; Sedimentary rocks are conspicuous in the central and eastern parts of the Bayda group outcrop area, and consist of interbedded sandstone and shale, in beds 1 cm-30 m thick, forming sandstone-shale units up to 1000 m thick, subordinate andesitic and felsic tuff, and purple sandstone, siltstone, and polymict conglomerate containing subrounded pebbles and cobbles of mafic and felsic volcanic rocks and granite. East and southeast of Bi'r al Bayda, the formation includes as much as 8000 m of lithic arenite and siltstone well-bedded in depositional units 10-30 cm thick, pebbly, well-bedded to massive volcanoclastic rocks, and local limestone. Sedimentary structures such as cross bedding, ripples, graded bedding, and mud cracks, and load casts are common. A magnetite-rich banded-iron formation is locally present in the vicinity of Shaghab. | Magmatic arc and forearc            |
| Older Granites             | Cryogenian                     | (In Egypt) Grey granite or older granite; are mainly represented by tonalites, monzodiorites and qz-monzodiorites, which are derived from calc-alkaline melamunious to prealuminous I-type magma and were emplaced under prevailing compressional regime <sup>237</sup> . The age determined for older granodiorite is 652.5+/- 2.6 Ma <sup>123</sup> .                                                                                                                                                                                                                                                                                                                                                                                                                                                                                                                                                                                                                                                                                                                                                                        | Magmatic arc                        |
| Metavolcanics              | Cryogenian                     | Made of intermediate to felsic metavolcanics and metapyroclastics                                                                                                                                                                                                                                                                                                                                                                                                                                                                                                                                                                                                                                                                                                                                                                                                                                                                                                                                                                                                                                                              | Magmatic arc                        |
| Metasediments              | Cryogenian                     | A three-fold stratigraphy is preserved in the basement of the Central Eastern Desert of Egypt. A basal section of oceanic crust includes ultramafics, gabbros and pillowed basalts. These older meta-volcanics are conformably succeeded by dominantly andesitic, calc-alkaline sequence of younger volcanics. The OMV and YMV are largely restricted to the the Central Eastern Desert, but analogous terranes are found in northern Arabia <sup>68</sup> .                                                                                                                                                                                                                                                                                                                                                                                                                                                                                                                                                                                                                                                                   | Accretionary complex invaded by arc |
| Al Bad granite super suite | Cryogenian to lower Ediacaran? | Granites, syenogranites and alkali-feldspar granite compositions, and high topographic relief.                                                                                                                                                                                                                                                                                                                                                                                                                                                                                                                                                                                                                                                                                                                                                                                                                                                                                                                                                                                                                                 | Magmatic arc                        |
| Hegaf Formation            | Tonian                         | Rocks are folded and faulted, locally strongly, and are metamorphosed to the greenschist, and locally higher, facies represented by amphibolite, mafic schist, quartz-feldspathic mica schist, and calc-silicate rock. Pillow basalt is abundant in the eastern exposures and a minor iron formation occurs in the south                                                                                                                                                                                                                                                                                                                                                                                                                                                                                                                                                                                                                                                                                                                                                                                                       | Accretionary complex                |
| Hegaf Formation            | Tonian                         | Rocks are folded and faulted, locally strongly, and are metamorphosed to the greenschist, and locally higher, facies represented by amphibolite, mafic schist, quartz-feldspathic mica schist, and calc-silicate rock. Pillow basalt is abundant in the eastern exposures and a minor iron formation occurs in the south.                                                                                                                                                                                                                                                                                                                                                                                                                                                                                                                                                                                                                                                                                                                                                                                                      | Accretionary complex                |

| Name                              | Age                   | Brief Description                                                                                                                                                                                                                                                                                                                                                                                                                                                                                                                                                                                                                                                                                                                                                                                                                                              | Interpretation                      |
|-----------------------------------|-----------------------|----------------------------------------------------------------------------------------------------------------------------------------------------------------------------------------------------------------------------------------------------------------------------------------------------------------------------------------------------------------------------------------------------------------------------------------------------------------------------------------------------------------------------------------------------------------------------------------------------------------------------------------------------------------------------------------------------------------------------------------------------------------------------------------------------------------------------------------------------------------|-------------------------------------|
| Silasia Formation                 | Tonian                | Tuffaceous sedimentary rocks and tuffs at the base; an intermediate unit of jaspilitic iron formation and ferruginous tuffs; and an upper sequence of tuffs, tuffite, and tuffaceous sedimentary rocks. The formation is intruded by subconcordant sills of metadiabase as much as 100 m thick and several kilometers long.                                                                                                                                                                                                                                                                                                                                                                                                                                                                                                                                    | Forearc basin fill                  |
| Ghawjah Formation                 | Tonian                | Massive porphyritic andesitic flows with interbeds of dacite, thin felsic tuffs and quartz latite, and wacke. Basaltic and andesitic breccia and agglomerate are subordinate. Layering and graded bedding in the wacke are well preserved although metamorphism has destroyed many diagnostic volcanic features. The rocks are metamorphosed to the greenschist facies, locally to amphibolite facies and, adjacent to some faults, are strongly foliated biotite-chlorite schist.                                                                                                                                                                                                                                                                                                                                                                             | Magmatic arc                        |
| Najah granodiorite                | Tonian                | Light to dark grey, uniformly medium grained granodiorites with well-developed hypidiomorphic-granular texture that is locally schistose and gneissic.                                                                                                                                                                                                                                                                                                                                                                                                                                                                                                                                                                                                                                                                                                         | Magmatic arc                        |
| Medium to High Grade Metamorphics | Tonian                | Mostly melanocratic medium to high grade metamorphic rocks; the age represents the exhumation <sup>82</sup> . Emplacement age for the orthogneisses change between 650 and 700 Ma <sup>95</sup> . In places it is also possible to see leucocratic metamorphics.                                                                                                                                                                                                                                                                                                                                                                                                                                                                                                                                                                                               | Accretionary complex invaded by arc |
| Metagabbro-Metadiorite Complex    | Tonian to Cryogenian? | In south Sinai, on the basis of petrography and mineral chemistry, there are three rock types: (1) pyroxene hornblende gabbros, (2) hornblende gabbros, and (3) diorites). The bulk-rock chemistry and the microprobe analyses of pyroxenes reveal a subalkaline magma generated in an island arc environment for the present metagabbro-diorite complex. K-Ar age dating of the hornblendes and biotites yield $794 \pm 30$ - $667 \pm 25$ Ma age <sup>238</sup> .                                                                                                                                                                                                                                                                                                                                                                                            | Accretionary complex                |
| <b>VI. Tadrart Unit</b>           |                       |                                                                                                                                                                                                                                                                                                                                                                                                                                                                                                                                                                                                                                                                                                                                                                                                                                                                |                                     |
| Ediacaran metamorphics            | lower Ediacaran       | Protolith is the Ediacaran sediments; amphibolite and greenschist facies. In the Djanet 'Terrane' it is in greenschist-facies sedimentary sequence (the Djanet Group), whereas it is made of amphibolite facies in Edembo 'Terrane'. In Edembo, we observe lithologies including biotite micaschists, metagreywacke with pebbles, phlogopite marble, hornblende metabasalt, and migmatitic gneiss; garnet is abundant in many lithologies. The Djanet Group is mainly a clastic series, comprising slates, quartzites, and conglomerates interleaved with decimeter to meter thick sills of pyroxene-amphibole andesite and minor amounts of more acid compositions, up to rhyolite. These sills are often boudinaged within the sedimentary sequence. Zircon Pb ages suggest ~590 Ma for the deposition and metamorphism of the Djanet Group <sup>154</sup> . | Accretionary complex invaded by arc |
| Ediacaran sediments               | lower Ediacaran       | See the protolith content for the Ediacaran metamorphics                                                                                                                                                                                                                                                                                                                                                                                                                                                                                                                                                                                                                                                                                                                                                                                                       | Accretionary complex                |

| Name                                           | Age                         | Brief Description                                                                                                                                                                                                                                                                                                                                                                                                                                                                                                                                                                                                           | Interpretation                      |
|------------------------------------------------|-----------------------------|-----------------------------------------------------------------------------------------------------------------------------------------------------------------------------------------------------------------------------------------------------------------------------------------------------------------------------------------------------------------------------------------------------------------------------------------------------------------------------------------------------------------------------------------------------------------------------------------------------------------------------|-------------------------------------|
| Ediacaran magmatics                            | lower Ediacaran             | Porphyritic granite, syeno-granite, rhyolite dyke                                                                                                                                                                                                                                                                                                                                                                                                                                                                                                                                                                           | Magmatic arc                        |
| <b>VII. Air-Biu Unit</b>                       |                             |                                                                                                                                                                                                                                                                                                                                                                                                                                                                                                                                                                                                                             |                                     |
| Ediacaran alkaline and alkali-calcic magmatics | upper Ediacaran             | This composite group comprises the late post-collisional alkali-calcic and alkaline plutons, dykes and volcanic rocks (570-520 Ma) of the Adrar des Iforas, the Tapurirt province in LATEA and in adjacent 'terrane' to the west and additional more isolated bodies such as the Tisselliline pluton in NE LATEA or the Tin Bedjane pluton and associated Tin Amali dyke swarm in Eastern Ahaggar <sup>10</sup> .                                                                                                                                                                                                           | Magmatic arc                        |
| Ediacaran magmatics                            | lower Ediacaran             | Adamellite, granodiorite, monzogranite                                                                                                                                                                                                                                                                                                                                                                                                                                                                                                                                                                                      | Magmatic arc                        |
| Ediacaran sediments                            | lower Ediacaran             | See the protolith content for the Ediacaran metamorphics. In the south, there is a lower Ediacaran eclogite (see ref. 5)                                                                                                                                                                                                                                                                                                                                                                                                                                                                                                    | Accretionary complex                |
| Older granites                                 | lower Ediacaran-Cryogenian? | (In Nigeria); They range widely in age and composition. But many geochronological constraints suggest early Ediacaran for the emplacement of the Older Granites. Their composition ranges from tonalites and diorites through granodiorites to true granites and syenites <sup>251</sup> . One sample dated as Tonian (793 Ma) <sup>66</sup> .                                                                                                                                                                                                                                                                              | Magmatic arc                        |
| Cryogenian volcano-sedimentary rocks           | Cryogenian                  | Greenschist facies volcano-sedimentary rocks                                                                                                                                                                                                                                                                                                                                                                                                                                                                                                                                                                                | Accretionary complex invaded by arc |
| Karaukarau Schist Belt                         | Pan-African?                | (In Nigeria) Mainly muscovite and muscovite-biotite schists interbedded with thin quartzites. Pelitic rocks include minor graphitic and feldspathic schists and contain frequent quartz and quartz-tourmaline veins. Interbedded quartzites are commonly thin but they may be grouped into sections with quartzite beds several tens of metres thick. Anthophyllite cordierite schists may have formed from rocks fed by ultramafics. Amphibolites form discontinuous bands but are not abundant. The original lithologies are muds and sands. Like a turbidite section. The age of the lot is estimated to be Pan-African. | Accretionary complex                |
| Kazaure Forearc Basin                          | Pan-African?                | (In Nigeria) Dominated by massive quartzites associated with schists and metaconglomerates in the north. May be deposited in a littoral or even continental environment. Has no igneous rocks intruding it and its deformation is characterised mostly by open folds. It is estimated that its age is Pan-African. Most likely a forearc basin.                                                                                                                                                                                                                                                                             | Forearc basin                       |

| Name                                           | Age                         | Brief Description                                                                                                                                                                                                                                                                                                                                                                                                                                                                                                                                                                                                                                                                                                                                                                                                                                                                                                                                                                                              | Interpretation                      |
|------------------------------------------------|-----------------------------|----------------------------------------------------------------------------------------------------------------------------------------------------------------------------------------------------------------------------------------------------------------------------------------------------------------------------------------------------------------------------------------------------------------------------------------------------------------------------------------------------------------------------------------------------------------------------------------------------------------------------------------------------------------------------------------------------------------------------------------------------------------------------------------------------------------------------------------------------------------------------------------------------------------------------------------------------------------------------------------------------------------|-------------------------------------|
| <i>VIII. Pharusian Unit</i>                    |                             |                                                                                                                                                                                                                                                                                                                                                                                                                                                                                                                                                                                                                                                                                                                                                                                                                                                                                                                                                                                                                |                                     |
| Ediacaran alkaline and alkali-calcic magmatics | upper Ediacaran             | This composite group comprises the late post-collisional alkali-calcic and alkaline plutons, dykes and volcanic rocks (570-520 Ma) of the Adrar des Iforas, the Tapurirt province in LATEA and in adjacent 'terranes' to the west and additional more isolated bodies such as the Tisselliline pluton in NE LATEA or the Tin Bedjane pluton and associated Tin Amali dyke swarm in Eastern Ahaggar <sup>10</sup> .                                                                                                                                                                                                                                                                                                                                                                                                                                                                                                                                                                                             | Magmatic arc                        |
| Anka Shist Belt                                | upper Ediacaran             | Metaconglomerates, sandstones, slates, phyllites, and felsic volcanic rocks. Conglomerates may locally reach thicknesses of some 150 to 250 m, but they do not persist laterally and are replaced by feldspathic metasandstones. The conglomerates contain pebbles of granite, quartzite, phyllite and volcanic rocks. They are clearly channels draining a volcanic arc to the east of the main belt green and purple grits are interbedded with shales and siltstones with fine cross-bedding and ripple marks. In the western part of the belt phyllites dominate with some metasiltstones and metasandstones with rhyolitic to dacitic volcanic rocks. The metamorphic mafic and ultramafic rocks are considered older than 1 Ga which is entirely probable representing ocean floor (see ref. 265). The associated amphibolites are tholeiitic in composition. The unmetamorphosed volcanic and sedimentary rocks are dated at 516±20 Ma. There are eclogite lenses of Lower Ediacaran age <sup>5</sup> . | Accretionary complex                |
| Ediacaran magmatics                            | lower Ediacaran             | Granodiorite, granite                                                                                                                                                                                                                                                                                                                                                                                                                                                                                                                                                                                                                                                                                                                                                                                                                                                                                                                                                                                          | Magmatic arc                        |
| Older granites                                 | lower Ediacaran-Cryogenian? | (In Nigeria); They range widely in age and composition. But many geochronological constraints suggest early Ediacaran for the emplacement of the Older Granites. Their composition ranges from tonalites and diorites through granodiorites to true granites and syenites <sup>251</sup> .                                                                                                                                                                                                                                                                                                                                                                                                                                                                                                                                                                                                                                                                                                                     | Magmatic arc                        |
| Cryogenian magmatics                           | Cryogenian                  | quartz-syenite                                                                                                                                                                                                                                                                                                                                                                                                                                                                                                                                                                                                                                                                                                                                                                                                                                                                                                                                                                                                 | Magmatic arc                        |
| Cryogenian volcano-sedimentary rocks           | Cryogenian                  | Greenschist facies volcano-sedimentary rocks                                                                                                                                                                                                                                                                                                                                                                                                                                                                                                                                                                                                                                                                                                                                                                                                                                                                                                                                                                   | Accretionary complex invaded by arc |
| Tonian magmatics                               | Tonian                      | granite, q-diorite (870-830 Ma) <sup>266</sup> .                                                                                                                                                                                                                                                                                                                                                                                                                                                                                                                                                                                                                                                                                                                                                                                                                                                                                                                                                               | Magmatic arc                        |
| Tonian volcano-sedimentary rocks               | Tonian                      |                                                                                                                                                                                                                                                                                                                                                                                                                                                                                                                                                                                                                                                                                                                                                                                                                                                                                                                                                                                                                | Accretionary complex invaded by arc |

| Name                                           | Age             | Brief Description                                                                                                                                                                                                                                                                                                                                                                                                              | Interpretation                       |
|------------------------------------------------|-----------------|--------------------------------------------------------------------------------------------------------------------------------------------------------------------------------------------------------------------------------------------------------------------------------------------------------------------------------------------------------------------------------------------------------------------------------|--------------------------------------|
| Maru Schist Belt                               | Tonian?         | Pelitic rocks dominate, mainly as phyllites and slates interlayered with siltstones. Banded iron formation containing magnetite, haematite and garnet is also present indicating deep-water deposition. Impure micaceous quartzites occur near the eastern margin of the belt. Mafic rocks represented by amphibolites are present in several localities. The whole thing is intruded by granites, granodiorites and syenites. | Accretionary complex invaded by arc? |
| <b><i>IX. Iforas Unit</i></b>                  |                 |                                                                                                                                                                                                                                                                                                                                                                                                                                |                                      |
| Ediacaran alkaline and alkali-calcic magmatics | upper Ediacaran | This composite group comprises the late post-collisional alkali-calcic and alkaline plutons, dykes and volcanic rocks (570-520 Ma) of the Adrar des Iforas, the Tapurirt province in LATEA and in adjacent 'terrane' to the west and additional more isolated bodies such as the Tisselliline pluton in NE LATEA or the Tin Bedjane pluton and associated Tin Amali dyke swarm in Eastern Ahaggar <sup>10</sup> .              | Magmatic arc                         |
| Ediacaran magmatics                            | lower Ediacaran | Granodiorite, alkaline granite, rhyolitic lavas, monzogranite, tonalite, and q-monzogranite                                                                                                                                                                                                                                                                                                                                    | Magmatic arc                         |
| Ediacaran sediments                            | lower Ediacaran | See the protolith content for the Ediacaran metamorphics. Unit includes eclogite lenses (~623 Ma) <sup>5</sup> .                                                                                                                                                                                                                                                                                                               | Accretionary complex                 |
| Cryogenian magmatics                           | Cryogenian      | plagiogranite, orthogneiss, granodiorite, diorite                                                                                                                                                                                                                                                                                                                                                                              | Magmatic arc                         |
| Cryogenian volcano-sedimentary rocks           | Cryogenian      | Greenschist facies volcano-sedimentary rocks                                                                                                                                                                                                                                                                                                                                                                                   | Accretionary complex invaded by arc  |
| Tonian volcano-sedimentary rocks               | Tonian          | q-diorite, orthogneiss,                                                                                                                                                                                                                                                                                                                                                                                                        | Accretionary complex invaded by arc  |
| <b><i>IXa. Tassendjanet Unit</i></b>           |                 |                                                                                                                                                                                                                                                                                                                                                                                                                                |                                      |
| Ediacaran magmatics                            | lower Ediacaran | Gabbro and granite <sup>146</sup> .                                                                                                                                                                                                                                                                                                                                                                                            | Magmatic arc                         |
| Ediacaran sediments                            | lower Ediacaran | See the protolith content for the Ediacaran metamorphics                                                                                                                                                                                                                                                                                                                                                                       | Accretionary complex                 |
| Cryogenian volcano-sedimentary rocks           | Cryogenian      | Greenschist facies volcano-sedimentary rocks                                                                                                                                                                                                                                                                                                                                                                                   | Accretionary complex invaded by arc  |
| Tonian volcano-sedimentary rocks               | Tonian          | It is mainly composed of a huge monotonous formation of turbiditic greywackes and conglomerates formed by the erosion of calc-alkaline lavas and plutons ranging from basaltic andesites to dacites in composition <sup>5, 267, 268</sup> and overlying volcanic and volcanoclastics (<680 Ma) <sup>269</sup> .                                                                                                                | Accretionary complex invaded by arc  |
| <b><i>IXb. Tilemsi Unit</i></b>                |                 |                                                                                                                                                                                                                                                                                                                                                                                                                                |                                      |
| Cryogenian magmatics                           | Cryogenian      | Plagiogranite, orthogneiss, granodiorite, and diorite                                                                                                                                                                                                                                                                                                                                                                          | Magmatic arc                         |

| Name                                 | Age        | Brief Description                                          | Interpretation                      |
|--------------------------------------|------------|------------------------------------------------------------|-------------------------------------|
| Cryogenian volcano-sedimentary rocks | Cryogenian | Greenschist facies volcano-sedimentary rocks with eclogite | Accretionary complex invaded by arc |
| Tonian magmatics                     | Tonian     | Q-diorite, and orthogneiss                                 | Magmatic arc                        |
| Tonian sediments                     | Tonian     | metaabasalts, acid metavolcanics, and mafic dyke complexe  | Accretionary complex                |

## SI References

1. Cottin, J. Y., Lorand, J. P., Agrinier, P., Bodinier, J. L., & Liégeois, J. P., 1998, Isotopic (O, Sr, Nd) and trace element geochemistry of the Laouni layered intrusions (Pan-African belt, Hoggar, Algeria): evidence for post-collisional continental tholeiitic magmas variably contaminated by continental crust. *Lithos*, 45(1-4), 197-222.
2. Ait-Djafer, S., Ouzegane, K., Paul-Liégeois, J., & Kienast, J. R., 2003, An example of post-collisional mafic magmatism: the gabbro–anorthosite layered complex from the Tin Zebane area (western Hoggar, Algeria). *Journal of African Earth Sciences*, 37(3-4), 313-330.
3. Liégeois, J.P., Latouche, L., Boughrara, M., Navez, J. and Guiraud, M., 2003. The LATEA metacraton (Central Hoggar, Tuareg shield, Algeria): behaviour of an old passive margin during the Pan-African orogeny. *Journal of African Earth Sciences*, 37(3-4), pp.161-190.
4. Augé, T., Joubert, M., & Bailly, L., 2012, Typology of mafic–ultramafic complexes in Hoggar, Algeria: Implications for PGE, chromite and base-metal sulphide mineralisation. *Journal of African Earth Sciences*, 63, 32-47.
5. Berger, J., Ouzegane, K., Bendaoud, A., Liégeois, J. P., Kiénast, J. R., Bruguier, O., & Caby, R., 2014. Continental subduction recorded by Neoproterozoic eclogite and garnet amphibolites from Western Hoggar (Tassendjanet terrane, Tuareg Shield, Algeria). *Precambrian Research*, 247, 139-158.
6. Caby R., 2014, Nature and evolution of Neoproterozoic ocean-continent transition: Evidence from the passive margin of the West African craton in NE Mali. *Journal of African Earth Sciences*, 91, 1-11.
7. Marignac, C., Aïssa, D. E., Bouabsa, L., Kesraoui, M., & Nedjari, S., 2016, The Hoggar Gold and Rare Metals Metallogenic Province of the Pan-African Tuareg Shield (Central Sahara, South Algeria): An Early Cambrian Echo of the Late Ediacaran Murzukian Event?. In *Mineral Deposits of North Africa* (pp. 371-404). Springer, Cham.
8. Aïssa, D. E., & Marignac, C., 2017, Controls on gold deposits in Hoggar, Tuareg shield (southern Algeria). *Journal of African Earth Sciences*, 127, 136-145.
9. Saad, W., Aïssa, D. E., Watanabe, K., & Taguchi, S., 2018, Gold deposits associated with the gabbroic rocks at Tirek area, western Hoggar, Algeria: fluid inclusion study. *Arabian Journal of Geosciences*, 11(2), 26.

10. Liégeois, J.-P., 2019, A new synthetic map of the Tuareg Shield: an overview of its global structure and geological evolution: in Bendaoud, A., Hamimi, Z., Hamoudi, M., Djemai, S. and Zoheir, B., editors, *The Geology of the Arab World—An Overview*: Springer Geology, Springer, Cham, pp. 83-107.
11. Conoco (1987) Geologic Map of Egypt. Egyptian General Authority for Petroleum (UNESCO Joint Map Project), 20 Sheets, Scale 1:500 000.
12. Azer, M. K. and Stern, R. J., 2007, Neoproterozoic (835-720 Ma) serpentinites in the eastern Desert, Egypt: Fragments of forearc mantle, *Journal of Geology*, v. 155, p. 457-472
13. Azer, M.K., 2014, Petrological studies of Neoproterozoic serpentinitized ultramafics of the Nubian Shield: spinel compositions as evidence of the tectonic evolution of Egyptian ophiolites. *Acta Geologica Polonica*, 64(1), pp.113-127.
14. Sedki, T., Ali, S., Mohamed, H.A. and Zaki, R., 2019, Sol Hamed Ophiolitic Complex, Southern Eastern Desert, Egypt: Petrological, Economic Potentiality and Structural Implications.
15. Abdallah, S.E., Ali, S. and Obeid, M.A., 2019, Geochemistry of an Alaskan-type mafic-ultramafic complex in Eastern Desert, Egypt: New insights and constraints on the Neoproterozoic island arc magmatism. *Geoscience Frontiers*, 10(3), pp.941-955.
16. El Kalioubi, B., Fowler, A.R. and Abdelmalik, K., 2020, The Metamorphism and Deformation of the Basement Complex in Egypt. In *The Geology of Egypt* (pp. 191-251). Springer, Cham.
17. Johnson, P.R., 2006, Explanatory notes to the map of Proterozoic geology of Western Saudi Arabia: Saudi Geological Survey Technical Report SGS-TR-2006-4, 62 p., 22 figs., 2 plates
18. Windley, B. F., Whitehouse M. J. and Mahfood, A. I. B-B., 1996, Early Precambrian gneiss terranes and Pan-African island arcs in Yemen: Crustal accretion of the eastern Arabian Shield, *Geology*, v. 24(2), p. 131-134.
19. Geological and Mineral Resources Department (G.M.R.D – Sudan), Saudi-Sudanese Red Sea Joint Commission (R.S.C. – Kingdom of Saudi Arabia), and Bureau de Recherches Géologiques et Minières (B.R.G.M. – France), 1981. Geological Map of the Sudan scale 1:20000000, drawn by the Département Arts Graphiques, B. R. G. M. Orléans, France and printed by Impact Graphic, Paris, 1 sheet.
20. GSE, 1973, The Geological Map of Ethiopia (1st edition) Scale 1:2000000, compiled by V. Kazmin in 1972, Geological Survey of Ethiopia, Ministry of Mines, Addis Ababa, Ethiopia
21. El Makkrouf, A. A., 1988. Tectonic interpretation of Jabal Eghei area and its regional application to Tibesti orogenic belt, south central Libya (SPLAJ). *Journal of African Earth Sciences (and the Middle East)*, 7(7-8), 945-967.
22. CGMW and UNESCO, 1990, International Geological Map of Africa Scale 1:50000000, Third edition, 6 map sheets.
23. Avigad, D., Gerdes, A., Morag, N. & Bechstädt, T., 2012. Coupled U–Pb–Hf of detrital zircons of Cambrian sandstones from Morocco and Sardinia: implications for provenance and Precambrian crustal evolution of North Africa. *Gondwana Research* 21, 690–703.
24. Brahimi, S., Liégeois, J. P., Ghienne, J. F., Munsch, M., & Bourmatte, A., 2018, The Tuareg shield terranes revisited and extended towards the northern Gondwana margin: Magnetic and gravimetric constraints. *Earth-Science Reviews*, 185, 572-599.



25. Blades, M. L., Foden, J., Collins, A. S., Alemu, T. and Woldetinsae, G., 2019, The origin of the ultramafic rocks of the Tulu Dimtu Belt, western Ethiopia – do they represent remnants of the Mozambique Ocean?, *Geological Magazine*, v. 156(1), pp. 62-82.
26. Boyden, J.R., Müller, R.D., Gurnis, M., Torsvik, T.H., Clark, J., Turner, M., Ivey-Law, H., Watson, R., and Cannon, J., 2011, Next-generation plate-tectonic reconstructions using GPlates, in Keller, R., and Baru, C., editors, *Geoinformatics*: Cambridge, UK, Cambridge University Press, pp. 95–114.
27. Torsvik, T.H. and Cocks, L.R.M., 2017, *Earth History and Palaeogeography*: Cambridge University Press, 317 pp.
28. Black, R., Liegeois, J.P., 1991. Pan-African plutonism of the Damagaram inlier, Niger Republic. *Journal African Earth Sciences* 13, 471–482.
29. Dixon, T.H., 1981. Age and chemical characteristics of some pre-Pan- African rocks in the Egyptian Shield. *Precambrian Research* 14, 119–133.
30. Stern, R.J., 1979. Late Precambrian Ensimatic Volcanism in the Central Eastern Desert, Egypt. Ph.D. thesis, Univ. California, San Diego.
31. Harms, U., Schandelmeier, H., Darbyshire, D.P.F., 1990. Pan-African reworked early/middle Proterozoic crust in NE Africa W of the Nile: Sr and Nd isotope evidence. *Journal Geological Society, London* 147, 859–872.
32. Harms, U., Darbyshire, D.P.F., Denkler, T., Hengst, M., Schandelmeier, H., 1994. Evolution of the Neoproterozoic Delgo suture zone and crustal growth in northern Sudan: Geochemical and radiogenic isotope constraints. *Geol Rundsch* 83: 591-603.
33. Abdel Rahman, E., Harms, U., Schandelmeier, H., Franz, G., Darbyshire, D. P. F., Horn, P., & Müller-Sohnius, D., 1990. A new ophiolite occurrence in NW Sudan—constraints on Late Proterozoic tectonism. *Terra nova*, 2(4), 363-376.
34. Blasband, B. B., 2006. Neoproterozoic Tectonics of the Arabian-Nubian Shield. Ph.D. Thesis, Mededelingen van die Faculteit Geowetenschappen, Universiteit Utrecht, Utrecht, The Netherlands.
35. Fleck, R. J., Greenwood, W. R., Hadley, D. G., Anderson, R. E., & Schmidt, D. L., 1980. Rubidium-strontium geochronology and plate-tectonic evolution of the southern part of the Arabian Shield (No. 1131). US Geological Survey; for sale by the Supt. of Docs., GPO.
36. Hadley, D.G., 1976, Geology of the Bi'r Jujuq quadrangle, Sheet 21/43D, Kingdom of Saudi Arabia: Saudi Arabian Directorate General Mineral Resources Geologic Map GM-26, scale 1:100,000, with text.
37. Coleman, R. G., 1973, Reconnaissance geology of the Khamis Mushayt quadrangle, Kingdom of Saudi Arabia: Saudi Arabian Directorate General Mineral Resources Geologic Map GM-5, scale 1:100,000.
38. Johnson, P.R., Kattan, F.H. and Wooden, J.L., 2001. Implications of SHRIMP and microstructural data on the age and kinematics of shearing in the Asir Terrane, southern Arabian Shield, Saudi Arabia. *Gondwana Research*, 4(2), pp.172-173.
39. Genna, A., Guerrot, C., Deschamps, Y., Nehlig, P., & Shanti, M., 1999. Les formations Ablah d'Arabie Saoudite (datation et implication géologique). *Comptes Rendus de l'Académie des Sciences-Series IIA-Earth and Planetary Science*, 329(9), 661-667.

40. Küster, D., Liegeois, J.-P., 2001. Sr, Nd isotopes and geochemistry of the Bayuda Desert high-grade metamorphic basement (Sudan): an early Pan-African oceanic convergent margin, not the edge of the East Saharan ghost craton. *Precambrian Research* 109, 1–23.
41. Liégeois, J.P., Black, R., Navez, J. and Latouche, L., 1994. Early and late Pan-African orogenies in the Air assembly of terranes (Tuareg Shield, Niger). *Precambrian research*, 67(1-2), pp.59-88.
42. Black, R., Liegeois, J.P., Navez, J. and Vialette, Y., 1991. Terrains exotiques dans les zones internes de la chaîne panafricaine trans-saharienne: les clefs fournies par l'Air sudoriental (République du Niger). *C. R. Acad. Sci. Paris*, 312: 889-895.
43. Pegram, W.J., Register, J.K., Fullagar, P.D., Ghuma, M.A., Rogers, J.J.W., 1976. Pan-African ages from a Tibesti massif batholith, southern Libya. *Earth and Planetary Scientific Letters* 30, 123– 128.
44. Pin, C., Poidevin, J.L., 1987. U–Pb zircon evidence for a Pan- African granulite facies metamorphism in the Central African Republic. A new interpretation of the high-grade series of the northern border of the Congo Craton. *Precambrian Research* 36, 303–312.
45. Duyverman, H. J., Harris, N. B., & Hawkesworth, C. J., 1982. Crustal accretion in the Pan African: Nd and Sr isotope evidence from the Arabian Shield. *Earth and Planetary Science Letters*, 59(2), 315-326.
46. Pallister, J.S., Stacey, J.S., Fischer, L.B. and Premo, W.R., 1988. Precambrian ophiolites of Arabia: Geologic settings, U- Pb geochronology, Pb-isotope characteristics, and implications for continental accretion. *Precambrian Research*, 38(1), pp.1-54.
47. Claesson, S., Pallister, J. S., & Tatsumoto, M., 1984. Samarium-neodymium data on two late Proterozoic ophiolites of Saudi Arabia and implications for crustal and mantle evolution. *Contributions to Mineralogy and Petrology*, 85(3), 244-252.
48. Ledru, P., and Augé, T., 1984. The Al 'Ays ophiolitic complex petrology and structural evolution: Saudi Arabian Deputy Ministry for Mineral Resources Open-File Report BRGM-OF- 04-15, 57 p.
49. Kröner, A., Halpern, M., and Basahel, A., 1984, Age and significance of metavolcanic sequences and granitoid gneisses from the Al-Lith area, Southwestern Arabian shield: *Bulletin of the Faculty of Earth Sciences, King Abdulaziz University*, v. 6, p. 380-388.
50. Stacey, J.S., Stoesser, D.B., Greenwood, W.R. and Fischer, L.B., 1984. U-Pb zircon geochronology and geological evolution of the Halaban-Al Amar region of the Eastern Arabian Shield, Kingdom of Saudi Arabia. *Journal of the Geological Society*, 141(6), pp.1043-1055.
51. Stacey, J.S. and Agar, R.A., 1985. U-Pb Isotopic evidence for the accretion of a continental microplate in the Zalm region of the Saudi Arabian Shield. *Journal of the Geological Society*, 142(6), pp.1189-1203.
52. Sultan, M., Tucker, R.D., El Alfy, Z., Attia, R., Ragab, A.G., 1994. U–Pb (zircon) ages for the gneissic terrane west of the Nile, southern Egypt. *Geologische Rundschau* 83, 514–522.
53. Abdel-Rahman, A. F. M., & Doig, R., 1987. The Rb-Sr geochronological evolution of the Ras Gharib segment of the northern Nubian Shield. *Journal of the Geological Society*, 144(4), 577-586.

54. Aït Malek, H., Gasquet, D., Bertrand, J.M., Leterrier, J., 1998. Eburnian and Panafrican granitoids from the Igherm, Kerdous and Bas-Draa Proterozoic inliers (western Anti-Atlas, Morocco): U–Pb geochronology on zircon *Comptes Rendus de l'Academie des Sciences Series IIA Earth and Planetary Science*, 327, pp. 819-826
55. Pons, J., Barbey, P., Nachit, H. and Burg, J.P., 2006. Development of igneous layering during growth of pluton: The Tarcouate Laccolith (Morocco). *Tectonophysics*, 413(3-4), pp.271-286.
56. Charlot, R., 1982. Caractérisation des événements éburnéens et panafricains dans l'Anti-Atlas marocain. Apport de la méthode géochronologique Rb/Sr. *N.M.Serv.Géol.Maroc* 313.
57. Darbyshire, D. P. F., Jackson, N. J., Ramsay, C. R., & Roobol, M. J., 1983. Rb-Sr isotope study of latest Proterozoic volcano-sedimentary belts in the Central Arabian Shield. *Journal of the Geological Society*, 140(2), 203-213.
58. D'Lemos, R. S., Inglis, J. D., & Samson, S. D., 2006. A newly discovered orogenic event in Morocco: Neoproterozoic ages for supposed Eburnean basement of the Bou Azzer inlier, Anti-Atlas Mountains. *Precambrian Research*, 147(1-2), 65-78.
59. Inglis, J.D., D'Lemos, R.S., Samson, S.D. and Admou, H., 2005. Geochronological constraints on Late Precambrian intrusion, metamorphism, and tectonism in the Anti-Atlas Mountains. *The Journal of geology*, 113(4), pp.439-450.
60. El Hadi, H., Simancas, J. F., Martínez-Poyatos, D., Azor, A., Tahiri, A., Montero, P., Fanning, C.M., Bea, F. & González-Lodeiro, F., 2010. Structural and geochronological constraints on the evolution of the Bou Azzer Neoproterozoic ophiolite (Anti-Atlas, Morocco). *Precambrian Research*, 182(1-2), 1-14.
61. Eyal, M., Litvinovsky, B. A., Katzir, Y., & Zanvilevich, A. N., 2004. The Pan-African high-K calc-alkaline peraluminous Elat granite from southern Israel: geology, geochemistry and petrogenesis. *Journal of African Earth Sciences*, 40(3-4), 115-136.
62. Gasquet, D., Chevremont, P., Baudin, T., Chalot-Prat, F., Guerrot, C., Cocherie, A., Roger, J., Hassenforder, B. & Cheilletz, A., 2004. Polycyclic magmatism in the Tagragra d'Akka and Kerdous–Tafeltast inliers (Western Anti-Atlas, Morocco). *Journal of African Earth Sciences*, 39(3-5), 267-275.
63. Inglis, J.D., MacLean, J.S., Samson, S.D., D'Lemos, R.S., Admou, H. and Hefferan, K., 2004. A precise U–Pb zircon age for the Bleida granodiorite, Anti-Atlas, Morocco: implications for the timing of deformation and terrane assembly in the eastern Anti-Atlas. *Journal of African Earth Sciences*, 39(3-5), pp.277-283.
64. Liégeois, J.P., Bertrand, J.M. and Black, R., 1987. The subduction-and collision-related Pan-African composite batholith of the Adrar des Iforas (Mali): A review. *Geological Journal*, 22(S2), pp.185-211.
65. Nouar, O., Henry, B., Liégeois, J.P., Derder, M.E.M., Bayou, B., Bruguier, O., Ouabadi, A., Amenna, M., Hemmi, A. and Ayache, M., 2011. Eburnean and Pan-African granitoids and the Raghane mega-shear zone evolution: Image analysis, U–Pb zircon age and AMS study in the Arokam Ténéré (Tuareg shield, Algeria). *Journal of African Earth Sciences*, 60(3), pp.133-152.
66. Henry, B., Liégeois, J.P., Nouar, O., Derder, M.E.M., Bayou, B., Bruguier, O., Ouabadi, A., Belhai, D., Amenna, M., Hemmi, A. and Ayache, M., 2009. Repeated granitoid intrusions during the Neoproterozoic along the western boundary of the Saharan metacraton, Eastern Hoggar,

- Tuareg shield, Algeria: an AMS and U–Pb zircon age study. *Tectonophysics*, 474(3-4), pp.417-434.
67. Bertrand, J. M. L., Caby, R., Ducrot, J., Lancelot, J., Moussine-Pouchkine, A., & Saadallah, A., 1978. The late Pan-African intracontinental linear fold belt of the eastern Hoggar (Central Sahara, Algeria): geology, structural development, U/Pb geochronology, tectonic implications for the Hoggar shield. *Precambrian Research*, 7(4), 349-376.
68. Stern, R. J., 1981. Petrogenesis and tectonic setting of Late Precambrian ensimatic volcanic rocks, Central Eastern Desert of Egypt. *Precambrian Research*, 16(3), 195-230.
69. Fullagar, P. D., PD, F., & Greenberg, J.K, 1978. Egyptian Younger Granites: A Single Period of Plutonism. *Precambrian Res.*, 6 (1978), p. A22
70. Wahed, A.A.A., Ali, K.G. A., Khalil, M.M.A. & Gawad, A.E.A, 2010. Dokhan volcanics of Gabal Monqul area, North Eastern Desert, Egypt: geochemistry and petrogenesis. *Arabian Journal of Geosciences*. 5. 10.1007/s12517-010-0136-z.
71. Breikreuz, C., Eliwa, H., Khalaf, I., El Gameel, K., Sergeev, S., Larionov, A., 2010 Neoproterozoic SHRIMP U–Pb zircon ages of Dokhan Volcanics in the northern part of the Eastern Desert, Egypt. 33rd International Geological Congress Oslo 2008 August 6–14th. Abstract
72. Segev, A., 1987. The age of the latest Precambrian volcanism in southern Israel, northeastern Sinai and southwestern Jordan—a re-evaluation. *Precambrian research*, 36(3-4), pp.277-285.
73. Bielski, M., 1982a. Stages in the Evolution of the Arabian- Nubian Massif in Sinai. Ph.D. Thesis, Hebrew Univ. of Jerusalem, 155 pp. (in Hebrew).
74. Bielski, M., 1982b. On the problem of the Lower Cambrian, age in the Arabian-Nubian Massif. In: G.S. Odin (Editor), *Numerical Dating in Stratigraphy*. Wiley, Chichester, pp. 943-948.
75. Lenz, H., Bender, F., Besang, C., Harre, W., Kreuzer, H., Muller, P. and Wendt, I., 1972. The age of early tectonic events in the zone of the Jordan geosuture, based on radiometric data. 24th Int. Geol. Congr. Montreal, 3: 371-379.
76. Stern, R.J. and Hedge, C.E., 1985. Geochronologic and isotopic constraints on late Precambrian crustal evolution in the Eastern Desert of Egypt. *American Journal of Science*, 285(2), pp.97-127.
77. Stern, R.J. and Manton, W.I., 1987. Age of Feiran basement rocks, Sinai: implications for late Precambrian crustal evolution in the northern Arabian–Nubian Shield. *Journal of the Geological Society*, 144(4), pp.569-575.
78. Eyal, Y., Eyal, M., Litvinovsky, B., Jahn, B. M., Calvo, R., & Golan, T., 2019. The evolution of the Neoproterozoic Elat Metamorphic Complex, northernmost Arabian-Nubian Shield: Island arc to syncollisional stage and post-collisional magmatism. *Precambrian Research*, 320, 137-170.
79. Kröner, A., Krüger, J. and Rashwan, A.E.A.A., 1994. Age and tectonic setting of granitoid gneisses in the Eastern Desert of Egypt and south-west Sinai. *Geologische Rundschau*, 83(3), pp.502-513.
80. Andresen, A., El-Rus, M. A. A., Myhre, P. I., Boghdady, G. Y., & Corfu, F., 2009. U–Pb TIMS age constraints on the evolution of the Neoproterozoic Meatiq Gneiss dome, Eastern Desert, Egypt. *International Journal of Earth Sciences*, 98(3), 481-497.

81. Fritz, H., Dallmeyer, D.R., Wallbrecher, E., Loizenbauer, J., Hoinkes, G., Neumayr, P. and Khudeir, A.A., 2002. Neoproterozoic tectonothermal evolution of the Central Eastern Desert, Egypt: a slow velocity tectonic process of core complex exhumation. *Journal of African Earth Sciences*, 34(3-4), pp.137-155.
82. Fritz, H., Wallbrecher, E., Khudeir, A.A., Abu El Ela, F., Dallmeyer, D.R., 1996. Formation of Neoproterozoic metamorphic core complexes during oblique convergence (Eastern Desert, Egypt). *Journal of African Earth Sciences* 23, 311–323.
83. Hassan, M.A., and Hashad, A.H., 1990. Precambrian of Egypt, in Said, R., ed, *The Geology of Egypt*, Netherlands, Balkema- Rotterdam, p. 201–245.
84. Stern, R.J., Ali, K.A., Liégeois, J.P., Johnson, P.R., Kozdroj, W. and Kattan, F.H., 2010. Distribution and significance of pre-Neoproterozoic zircons in juvenile Neoproterozoic igneous rocks of the Arabian-Nubian Shield. *American Journal of Science*, 310(9), pp.791-811.
85. Kröner, A., Todt, W., Hussein, I.M., Mansour, M. and Rashwan, A., 1992. Dating of late Proterozoic ophiolites in Egypt and the Sudan using the single grain zircon evaporation technique. *Precambrian Research*, 59(1-2), pp.15-32.
86. Loizenbauer, J., Wallbrecher, E., Fritz, H., Neumayr, P., Khudeir, A.A. and Kloetzli, U., 2001. Structural geology, single zircon ages and fluid inclusion studies of the Meatiq metamorphic core complex: implications for Neoproterozoic tectonics in the Eastern Desert of Egypt. *Precambrian Research*, 110(1-4), pp.357-383.
87. Sami, M., Ntaflos, T., Farahat, E.S., Mohamed, H.A., Hauzenberger, C. and Ahmed, A.F., 2018. Petrogenesis and geodynamic implications of Ediacaran highly fractionated A-type granitoids in the north Arabian-Nubian Shield (Egypt): constraints from whole-rock geochemistry and Sr-Nd isotopes. *Lithos*, 304, pp.329-346.
88. Abd El-Naby, H., Frisch, W. and Siebel, W., 2008. Tectono-metamorphic evolution of the Wadi Hafafit Culmination (central Eastern Desert, Egypt). Implication for Neoproterozoic core complex exhumation in NE Africa. *Geologica Acta: an international earth science journal*, 6(4), pp.293-312.
89. Ali, K. A., Stern, R. J., Manton, W. I., Kimura, J. I., & Khamees, H. A., 2009a. Geochemistry, Nd isotopes and U–Pb SHRIMP zircon dating of Neoproterozoic volcanic rocks from the Central Eastern Desert of Egypt: New insights into the ~ 750 Ma crust-forming event. *Precambrian Research*, 171(1-4), 1-22.
90. Ali, K. A., Azer, M. K., Gahlan, H. A., Wilde, S. A., Samuel, M. D., & Stern, R. J., 2010. Age constraints on the formation and emplacement of Neoproterozoic ophiolites along the Allaqi–Heiani Suture, South Eastern Desert of Egypt. *Gondwana Research*, 18(4), 583-595.
91. Ali, K., Andresen, A., Manton, W. I., Stern, R. J., Omar, S. A., & Maurice, A. E., 2012. U–Pb zircon dating and Sr–Nd–Hf isotopic evidence to support a juvenile origin of the ~ 634 Ma El Shalul granitic gneiss dome, Arabian–Nubian Shield. *Geological Magazine*, 149(5), 783-797.
92. Ali, K. A., Kröner, A., Hegner, E., Wong, J., Li, S. Q., Gahlan, H. A., & El Ela, F. F. A., 2015. U–Pb zircon geochronology and Hf–Nd isotopic systematics of Wadi Beitan granitoid gneisses, south Eastern Desert, Egypt. *Gondwana Research*, 27(2), 811-824.
93. Ali, B. H., Wilde, S. A., & Gabr, M. M. A., 2009b. Granitoid evolution in Sinai, Egypt, based on precise SHRIMP U–Pb zircon geochronology. *Gondwana Research*, 15(1), 38-48.

94. Augland, L. E., Andresen, A., & Boghdady, G. Y., 2012. U–Pb ID-TIMS dating of igneous and metagneous rocks from the El-Sibai area: time constraints on the tectonic evolution of the Central Eastern Desert, Egypt. *International Journal of Earth Sciences*, 101(1), 25-37.
95. Bregar, M., Bauernhofer, A., Pelz, K., Kloetzli, U., Fritz, H., & Neumayr, P., 2002. A late Neoproterozoic magmatic core complex in the Eastern Desert of Egypt: emplacement of granitoids in a wrench-tectonic setting. *Precambrian Research*, 118(1-2), 59-82
96. Lundmark, A.M., Andresen, A., Hassan, M.A., Augland, L.E. and Boghdady, G.Y., 2012. Repeated magmatic pulses in the East African Orogen in the Eastern Desert, Egypt: an old idea supported by new evidence. *Gondwana Research*, 22(1), pp.227-237.
97. Thomas, R.J., Chevallier, L.P., Gresse, P.G., Harmer, R.E., Eglington, B.M., Armstrong, R.A., De Beer, C.H., Martini, J.E.J., De Kock, G.S., Macey, P.H. and Ingram, B.A., 2002. Precambrian evolution of the Sirwa window, Anti-Atlas orogen, Morocco. *Precambrian Research*, 118(1-2), pp.1-57.
98. Tubosun, I.A., Lancelot, J.R., Rahaman, M.A. and Ocan, O., 1984. U-Pb Pan-African ages of two charnockite-granite associations from southwestern Nigeria. *Contributions to Mineralogy and Petrology*, 88(1-2), pp.188-195.
99. Shellnutt, J.G., Pham, N.H.T., Denyszyn, S.W., Yeh, M.W. and Lee, T.Y., 2017. Timing of collisional and post-collisional Pan-African Orogeny silicic magmatism in south-central Chad. *Precambrian Research*, 301, pp.113-123.
100. Kröner, A., Stern, R.J., Dawoud, A.S., Compston, W., Reischmann, T., 1987. The Pan-African continental margin in NE Africa: evidence from a geochronological study of granulites at Sabaloka, Sudan. *Earth Planetary Science Letters* 85, 91–104.
101. Bertrand, J. M., Michard, A., Boullier, A. M., & Dautel, D., 1986. Structure and U/Pb geochronology of Central Hoggar (Algeria): A reappraisal of its Pan-African evolution. *Tectonics*, 5(7), 955-972.
102. Liégeois, J.P. and Stern, R.J., 2010. Sr–Nd isotopes and geochemistry of granite-gneiss complexes from the Meatiq and Hafafit domes, Eastern Desert, Egypt: no evidence for pre-Neoproterozoic crust. *Journal of African Earth Sciences*, 57(1-2), pp.31-40.
103. Inglis, J.D., Hefferan, K., Samson, S.D., Admou, H. and Saquaque, A., 2017. Determining age of Pan African metamorphism using Sm-Nd garnet-whole rock geochronology and phase equilibria modeling in the Tasriwine ophiolite, Sirwa, Anti-Atlas Morocco. *Journal of African Earth Sciences*, 127, pp.88-98.
104. Gasquet, D., Levresse, G., Cheilletz, A., Azizi-Samir, M. R., & Mouttaqi, A., 2005. Contribution to a geodynamic reconstruction of the Anti-Atlas (Morocco) during Pan-African times with the emphasis on inversion tectonics and metallogenic activity at the Precambrian–Cambrian transition. *Precambrian Research*, 140(3-4), 157-182.
105. Ducrot, J., & Lancelot, J. R., 1977. Problème de la limite Précambrien–Cambrien: étude radiochronologique par la méthode U–Pb sur zircons du volcan du Jbel Boho (Anti-Atlas marocain). *Canadian Journal of Earth sciences*, 14(12), 2771-2777.
106. Landing, E., Bowring, S.A., Davidek, K.L., Westrop, S.R., Geyer, G. and Heldmaier, W., 1998. Duration of the Early Cambrian: U-Pb ages of volcanic ashes from Avalon and Gondwana. *Canadian Journal of Earth Sciences*, 35(4), pp.329-338.

107. Walsh, G.J., Aleinikoff, J.N., Benziane, F., Yazidi, A. and Armstrong, T.R., 2002. U–Pb zircon geochronology of the Paleoproterozoic Tagragra de Tata inlier and its Neoproterozoic cover, western Anti-Atlas, Morocco. *Precambrian Research*, 117(1-2), pp.1-20.
108. Samson, S.D., Inglis, J.D., D'lemos, R.S., Admou, H., Blichert-Toft, J. and Hefferan, K., 2004. Geochronological, geochemical, and Nd–Hf isotopic constraints on the origin of Neoproterozoic plagiogranites in the Tasriwine ophiolite, Anti-Atlas orogen, Morocco. *Precambrian Research*, 135(1-2), pp.133-147.
109. Mifdal, A. and Peucat, J.J., 1985. Datations U-Pb et Rb-Sr du volcanisme acide de l'Anti-Atlas marocain et du socle sous-jacent dans la région de Ouarzazate. Apport au problème de la limite Précambrien-Cambrien. U-Pb and Rb-Sr dating of acidic volcanic rocks and Precambrian basement in Anti-Atlas of Morocco (Ouarzazate). Contribution for numerical dating of Precambrian-Cambrian boundary. *Sciences Géologiques, bulletins et mémoires*, 38(2), pp.185-200.
110. Walsh, G.J., Aleinikoff, J.N., Benziane, F., Yazidi, A. and Armstrong, T.R., 2002. U–Pb zircon geochronology of the Paleoproterozoic Tagragra de Tata inlier and its Neoproterozoic cover, western Anti-Atlas, Morocco. *Precambrian Research*, 117(1-2), pp.1-20.
111. Beyth, M., & Heimann, A. (1999). The youngest igneous event in the crystalline basement of the Arabian-Nubian Shield, Timna Igneous Complex. *Isr. J. Earth Sci*, 48(2), 113-120.
112. Be'eri-Shlevin, Y., Katzir, Y., & Valley, J. W., 2009b. Crustal evolution and recycling in a juvenile continent: oxygen isotope ratio of zircon in the northern Arabian Nubian Shield. *Lithos*, 107(3-4), 169-184.
113. Be'eri-Shlevin, Y., 2008. The origin and evolution of Neoproterozoic magmatism in the northern Arabian-Nubian Shield (Sinai Peninsula, Egypt and southern Israel): evidence from stable and radiogenic isotope record. Unpublished Ph.D. thesis, Ben-Gurion University, Israel. 134 pp.
114. Beyth, M., & Reischmann, T. (1996). The age of the quartz monzodiorite, the youngest plutonic intrusion in the Timna Igneous Complex. *Israel Journal of Earth Sciences*, 45, 223-226.
115. Be'eri-Shlevin, Y., Katzir, Y., & Whitehouse, M., 2009a. Post-collisional tectonomagmatic evolution in the northern Arabian–Nubian Shield: time constraints from ion-probe U–Pb dating of zircon. *Journal of the Geological Society*, 166(1), 71-85.
116. Beyth, M., Stern, R. J., Altherr, R., & Kröner, A. (1994). The late Precambrian Timna igneous complex, southern Israel: evidence for comagmatic-type sanukitoid monzodiorite and alkali granite magma. *Lithos*, 31(3-4), 103-124.
117. Morag, N., Avigad, D., Gerdes, A., Belousova, E. and Harlavan, Y., 2011. Crustal evolution and recycling in the northern Arabian-Nubian Shield: New perspectives from zircon Lu–Hf and U–Pb systematics. *Precambrian Research*, 186(1-4), pp.101-116.
118. Katz, O., Avigad, D., Matthews, A. and Heimann, A., 1998. Precambrian metamorphic evolution of the Arabian-Nubian Shield in the Roded area. *Israel Journal of Earth Sciences*, 47, pp.93-110.
119. Kröner, A., Eyal, M. and Eyal, Y., 1990. Early Pan-African evolution of the basement around Elat, Israel, and the Sinai Peninsula revealed by single-zircon evaporation dating, and implications for crustal accretion rates. *Geology*, 18(6), pp.545-548.

120. Kröner, A., Linnebacher, P., Stern, R.J., Reischmann, T., Manton, W. and Hussein, I.M., 1991. Evolution of Pan-African island arc assemblages in the southern Red Sea Hills, Sudan, and in southwestern Arabia as exemplified by geochemistry and geochronology. *Precambrian Research*, 53(1-2), pp.99-118.
121. Reischmann, T., Bachtadse, V., Kröner, A. and Layer, P., 1992. Geochronology and palaeomagnetism of a late Proterozoic island arc terrane from the Red Sea Hills, northeast Sudan. *Earth and Planetary Science Letters*, 114(1), pp.1-15.
122. Küster, D., Liégeois, J.P., Matukov, D., Sergeev, S. and Lucassen, F., 2008. Zircon geochronology and Sr, Nd, Pb isotope geochemistry of granitoids from Bayuda Desert and Sabaloka (Sudan): evidence for a Bayudian event (920–900 Ma) preceding the Pan-African orogenic cycle (860–590 Ma) at the eastern boundary of the Saharan Metacraton. *Precambrian Research*, 164(1-2), pp.16-39.
123. Moussa, E.M., Stern, R.J., Manton, W.I. and Ali, K.A., 2008. SHRIMP zircon dating and Sm/Nd isotopic investigations of Neoproterozoic granitoids, Eastern Desert, Egypt. *Precambrian Research*, 160(3-4), pp.341-356.
124. Geisler, T., Rashwan, A. A., Rahn, M. K. W., Poller, U., Zwingmann, H., Pidgeon, R. T., Schleicher, H. & Tomaschek, F., 2003. Low-temperature hydrothermal alteration of natural metamict zircons from the Eastern Desert, Egypt. *Mineralogical Magazine*, 67(3), 485-508.
125. Wilde, S.A. and Youssef, K., 2000. Significance of SHRIMP U-Pb dating of the imperial porphyry and associated Dokhan volcanics, Gebel Dokhan, north Eastern Desert, Egypt. *Journal of African Earth Sciences*, 31(2), pp.403-413.
126. Hargrove, U.S., 2006, Crustal evolution of the Neoproterozoic Bi'r Umq suture zone, Kingdom of Saudi Arabia: Geochronological, isotopic, and geochemical constraints: Ph.D. Thesis, University of Texas at Dallas, 343 p.
127. Kennedy, A., Johnson, P.R., and Kattan, F.H., 2004. SHRIMP geochronology in the northern Arabian Shield, Part I: Data acquisition: Saudi Geological Survey Open-file Report SGS- OF-2004-11, 28 pp.
128. Kennedy, A., Johnson, P.R., and Kattan, F.H., 2005. SHRIMP geochronology in the northern Arabian Shield: Part II: Data acquisition 2004: Saudi Geological Survey Open-File Report SGS- OF-2005-10, 44 pp.
129. Doebrich, J. L., Al-Jehani, A. M., Siddiqui, A. A., Hayes, T. S., Wooden, J. L., & Johnson, P. R., 2007. Geology and metallogeny of the Ar Rayn terrane, eastern Arabian shield: evolution of a Neoproterozoic continental-margin arc during assembly of Gondwana within the East African Orogen. *Precambrian Research*, 158(1-2), 17-50.
130. Whitehouse, M.J., Windley, B.F., Ba-Bttat, M.A., Fanning, C.M. and Rex, D.C., 1998. Crustal evolution and terrane correlation in the eastern Arabian Shield, Yemen: geochronological constraints. *Journal of the Geological Society*, 155(2), pp.281-295.
131. Finger, F., Dörr, W., Gerdas, A., Gharib, M., & Dawoud, M., 2008. U-Pb zircon ages and geochemical data for the Monumental Granite and other granitoid rocks from Aswan, Egypt: implications for the geological evolution of the western margin of the Arabian Nubian Shield. *Mineralogy and Petrology*, 93(3-4), 153.



132. Azer, M. K., Stern, R. J., & Kimura, J. I., 2010. Origin of a Late Neoproterozoic (605±13 Ma) intrusive carbonate–albitite complex in Southern Sinai, Egypt. *International Journal of Earth Sciences*, 99(2), 245-267.
133. Bea, F., Abu-Anbar, M., Montero, P., Peres, P., & Talavera, C., 2009. The ~844 Ma Moneiga quartz-diorites of the Sinai, Egypt: Evidence for Andean-type arc or rift-related magmatism in the Arabian-Nubian Shield?. *Precambrian Research*, 175(1-4), 161-168.
134. Kröner, A. and Sassi, F.P., 1996. Evolution of the northern Somali basement: new constraints from zircon ages. *Journal of African Earth Sciences*, 22(1), pp.1-15.
135. Schandelmeier, H., Rahman, E.A., Wipfler, E., Küster, D., Utke, A. and Matheis, G., 1994. Late Proterozoic magmatism in the Nakasib suture, Red Sea Hills, Sudan. *Journal of the Geological Society*, 151(3), pp.485-497.
136. Stern, R.J. and Kröner, A., 1993. Late Precambrian crustal evolution in NE Sudan: isotopic and geochronologic constraints. *The Journal of Geology*, 101(5), pp.555-574.
137. Stern, R.J., Kröner, A.; Manton, W. I.; Reischmann, T.; Mansour, M.; and Hussein, I. M., 1989, Geochronology of the late Precambrian Hamisana shear zone, Red Sea Hills, Sudan and Egypt: *Jour. Geol. Soc. London*, v. 146, p. 1017-1029.
138. Teklay, M., 1997. Petrology, Geochemistry and Geochronology of Neoproterozoic Magmatic Arc Rocks from Eritrea: Implications for Crustal Evolution in the Southern Nubian Shield, vol. 1. Department of Mines, Eritrea, p. 125 (Memoir).
139. Teklay, M., Kröner, A., Mezger, K. and Oberhänsli, R., 1998. Geochemistry, Pb-Pb single zircon ages and Nd-Sr isotope composition of Precambrian rocks from southern and eastern Ethiopia: implications for crustal evolution in East Africa. *Journal of African Earth Sciences*, 26(2), pp.207-227.
140. Blein, O., Baudin, T., Chevremont, P., Soulaïmani, A., Admou, H., Gasquet, P., Cocherie, A., Egal, E., Youbi, N., Razin, P., Bouabdelli, M., Gombert, P., 2014a. Geochronological constraints on the polycyclic magmatism in the Bou Azzer-El Graara inlier (central Anti-Atlas Morocco). *Journal of African Earth Sciences*, 99, 287-306.
141. Blein, O., Baudin, T., Soulaïmani, A., Cocherie, A., Chevremont, P., Admou, H., Ouanaïmi, H., Razin, P., Bouabdelli, M., & Roger, J., 2014b. New geochemical, geochronological and structural constraints on the Ediacaran evolution of the south Sirwa, Agadir-Melloul and Iguerda inliers, Anti-Atlas, Morocco. *Journal of African Earth Sciences*, 98, 47-71.
142. Suayah, I.B., Miller, J.S., Miller, B.V., Bayer, T.M. and Rogers, J.J., 2006. Tectonic significance of Late Neoproterozoic granites from the Tibesti massif in southern Libya inferred from Sr and Nd isotopes and U–Pb zircon data. *Journal of African Earth Sciences*, 44(4-5), pp.561-570.
143. Suayah, I.B. and Rogers, J.J., 1986. Geochemistry, chronology and petrogenesis of the Wadi Yebigue pluton, central Tibesti massif, Libya. *Journal of African Earth Sciences* (1983), 5(4), pp.413-422.
144. Caby, R., Andreopoulos-Renaud, U., & Pin, C., 1989. Late Proterozoic arc–continent and continent–continent collision in the Pan-African Trans-Saharan Belt of Mali. *Canadian Journal of Earth Sciences*, 26(6), 1136-1146.

145. Ferkous, K., & Monie, P., 2002. Neoproterozoic shearing and auriferous hydrothermalism along the lithospheric N–S East in Ouzzal shear zone (Western Hoggar, Algeria, North Africa). *Journal of African Earth Sciences*, 35(3), 399-415.
146. Hadj-Kaddour, Z., Liegeois, J.P., Demaiffe, D. and Caby, R., 1998. The alkaline–peralkaline granitic post-collisional Tin Zebane dyke swarm (Pan-African Tuareg shield, Algeria): prevalent mantle signature and late agpaitic differentiation. *Lithos*, 45(1-4), pp.223-243.
147. Lancelot, J.R., Boullier, A.M., Maluski, H. and Ducrot, J., 1983. Deformation and related radiochronology in a late Pan-African mylonitic shear zone, Adrar des Iforas (Mali). *Contributions to Mineralogy and Petrology*, 82(4), pp.312-326.
148. Paquette, J.L., Caby, R., Djouadi, M.T. and Bouchez, J.L., 1998. U–Pb dating of the end of the Pan-African orogeny in the Tuareg shield: the post-collisional syn-shear Tioueine pluton (Western Hoggar, Algeria). *Lithos*, 45(1-4), pp.245-253.
149. Pouclet, A., Ouazzani, H. and Fekkak, A., 2008. The Cambrian volcano-sedimentary formations of the westernmost High Atlas (Morocco): their place in the geodynamic evolution of the West African Palaeo-Gondwana northern margin. *Geological Society, London, Special Publications*, 297(1), pp.303-327.
150. El Attari, A., Pereira, M. F., Ezzouhairi, H., El Houicha, M., Jouhari, A., Berrada, I., Fekkak, A., Ennih, N., Hoepffner, Ch., Gama, C., & Silva, J. B., 2019. Zircon U-Pb geochronology and geochemistry of Cambrian magmatism in the Coastal Block (Oued Rhebar volcanic complex, Moroccan Meseta): Implications for the geodynamic evolutionary model of North-Gondwana. *Journal of African Earth Sciences*, 160, 103598.
151. El Houicha, M., Pereira, M. F., Jouhari, A., Gama, C., Ennih, N., Fekkak, A., Ezzouhairi, H., El Attari, A. & Silva, J. B., 2018. Recycling of the Proterozoic crystalline basement in the Coastal Block (Moroccan Meseta): New insights for understanding the geodynamic evolution of the northern peri-Gondwanan realm. *Precambrian Research*, 306, 129-154.
152. Berrada, I., Fekkak, A., El Houicha, M., Ouanimi, H., Jouhari, A., Ezzouhairi, H., El Attari, A., Pereira, M.F. and Gasquet, D., 2019, April. First evidence of early Cambrian felsic-intermediate plutonism in the Western High Atlas (Moroccan Atlas-Meseta Domain): SHRIMP U-Pb zircon geochronology study. In *Magmatisme, Métamorphisme et Minéralisations Associées 3MA-11ème coll.*
153. Bosch, D., Bruguier, O., Caby, R., Buscail, F., & Hammor, D., 2016. Orogenic development of the Adrar des Iforas (Tuareg Shield, NE Mali): New geochemical and geochronological data and geodynamic implications. *Journal of Geodynamics*, 96, 104-130.
154. Fezaa, N., Liégeois, J. P., Abdallah, N., Cherfouh, E. H., De Waele, B., Bruguier, O., & Ouabadi, A. (2010). Late Ediacaran geological evolution (575–555 Ma) of the Djanet Terrane, Eastern Hoggar, Algeria, evidence for a Murzukian intracontinental episode. *Precambrian Research*, 180(3-4), 299-327.
155. Ghuma, M. A. (1975). The geology and geochemistry of the Ben Ghnema batholith. Tibisti massif, southern Libya, LAR [Ph. D. thesis]: Houston, Texas, Rice University, 185.
156. Zhang, W., Pease, V., Whitehouse, M.J., El-Sankary, M.M. and Shalaby, M.H., 2019. From the Libyan border to the Nile–Neoproterozoic magmatism and basement evolution of southern Egypt. *International Geology Review*, 61(16), pp.2057-2079.

157. Shalaby, A., Stüwe, K., Makroum, F., Fritz, H., Kebede, T. and Klötzli, U., 2005. The Wadi Mubarak belt, Eastern Desert of Egypt: a Neoproterozoic conjugate shear system in the Arabian–Nubian Shield. *Precambrian Research*, 136(1), pp.27-50.
158. Schandelmeier, H., Richter, A. and Harms, U., 1987. Proterozoic deformation of the East Saharan Craton in southeast Libya, south Egypt and north Sudan. *Tectonophysics*, 140(2-4), pp.233-246.
159. Kozdrój, W., Kennedy, A.K., Johnson, P.R., Ziólkowska-Kozdrój, M. and Kadi, K., 2017. Geochronology in the southern Midyan terrane: a review of constraints on the timing of magmatic pulses and tectonic evolution in a northwestern part of the Arabian Shield. *International Geology Review*, 60(10), pp.1290-1319.
160. Kennedy, A., Kozdrój, W., Kattan, F.H., Kozdrój, M.Z., and Johnson, P.R., 2010. SHRIMP Geochronology in the Arabian Shield (Midyan Terrane, Afif Terrane, Ad Dawadimi Terrane) and Nubian Shield (Central Eastern Desert), Part IV. Data acquisition 2008. Saudi Geological Survey Open-File Report SGS-OF-2010-10, 101 pp.
161. Kennedy, A., Kozdrój, W., Johnson, P.R., and Kattan, F.H., 2011a. SHRIMP Geochronology in the Northern Arabian Shield. Part III. Data Acquisition 2006. Saudi Geological Survey. Open-File Report SGS-OF-2007-9, 81 pp.
162. Kennedy, A., Kozdrój, W., Kadi, K., Kozdrój, M.Z., and Johnson, P. R., 2011b. SHRIMP geochronology in the Arabian Shield (Midyan Terrane, Afif Terrane) and Nubian Shield (Central Eastern Desert Terrane), Part V: Data acquisition 2009. Saudi Geological Survey. Open-File Report SGS-OF-2010-11, 80 pp.
163. Hassan, M., Stüwe, K., Abu-Alam, T.S., Klötzli, U., and Tiepolo, M., 2016a. Time constraints on deformation of the Ajjaj branch of one of the largest Proterozoic shear zones on Earth: The Najd Fault System: *Gondwana Research*, no. 34, p. 346–362. 10.1016/j.gr.2015.04.009
164. Vickers-Rich, P., Ivantsov, A., Kattan, F.H., Johnson, P.R., Al-Qubani, A., Kashghari, W., Leonov, M., Rich, T.H., Linnemann, U., Hofmann, M., Trusler, P., Smith, J., Yazed, A., Rich, B., Al-Garni Shamari, A., Al-Barakati, A., and Al-Kaff, M.H., 2013, In search of the Kingdom's Ediacarans: The first genuine metazoans (macroscopic body and trace fossils) from the Neoproterozoic Jibalah group (Vendian/Ediacaran) on the Arabian Shield: Saudi Geological Survey Technical Report, SGS-TR-2013-5. 21 p.
165. Vickers-Rich, P., Kozdrój, W., Kattan, F.H., Leonov, M., Ivantsov, A., Johnson, P.R., Linnemann, U., Hofmann, M., Al-Garni, S. M., Al Qubani, A., Shamari, A., Al-Barakati, A., Al-Kaff, M.H., Ziólkowska-Kozdrój, M., Rich, T.H., Trusler, P., and Rich, B., 2010, Reconnaissance for an Ediacaran Fauna, Kingdom of Saudi Arabia. Saudi Geological Survey, Technical Report, SGS-TR-2010-8, 42 p., 74.
166. Al-Husseini, M., 2015, Spatio-temporal position of the Ediacaran Thalbah Basin in the Najd Fault System, Arabian Shield, *GeoArabia*, 2015, v. 20, no. 1, p. 17-44.
167. Abdelsalam, M.G., Stern, R.J., Copeland, P., Elfaki, E.M., Elhur, B., Ibrahim, F.M., 1998, The Neoproterozoic Keraf suture in NE Sudan: Sinistral transpression along the eastern margin of West Gondwana. *Journal of Geology* 106, 133–147.
168. Barth, H.; Besang, C.; Lenz, H.; and Meinhold, K.-D., 1983, Results of Petrological Investigations and Rb/Sr age determinations on the Non-orogenic Ring-com-plexes in the Bayuda Desert, Sudan: *Geol. Jb.*, v. 51, p. 3–34.

169. Aleinikoff, J.N., Stoesser, D.B., 1988. Zircon Morphology and U–Pb Geochronology of Seven Metaluminous and Peralkaline Post-Orogenic Granite Complexes of the Arabian Shield, Kingdom of Saudi Arabia. Saudi Arabian Directorate General of Mineral Resources Open-File Report USGS-OF-06-5, 32 p.
170. Ali, K.A., Stern, R.J., Manton, W.I., Kimura, J.I. and Khamees, H.A., 2009c. Geochemistry, Nd isotopes and U–Pb SHRIMP zircon dating of Neoproterozoic volcanic rocks from the Central Eastern Desert of Egypt: New insights into the ~ 750 Ma crust-forming event. *Precambrian Research*, 171(1-4), pp.1-22.
171. Al-Saleh, A. M. 2012. The Kirsh gneiss dome: An extensional metamorphic core complex from the SE Arabian Shield. *Arabian Journal of Geosciences - ARAB J GEOSCI.* 5. 10.1007/s12517-010-0179-1.
172. Al-Saleh, A.M., Boyle, A.P., 2001. Structural rejuvenation of the eastern Arabian shield during continental collision:  $^{40}\text{Ar}/^{39}\text{Ar}$  evidence from the Ar Ridaniyah ophiolite mélangé. *Journal of African Earth Sciences* 33, 135–141.
173. Ali, K.A., Stern, R.J., Manton, W.I., Kimura, J.I., Whitehouse, M.J., Mukherjee, S.K., Johnson, P.R. and Griffin, W.R., 2010b. Geochemical, U–Pb zircon, and Nd isotope investigations of the Neoproterozoic Ghawjah metavolcanic rocks, northwestern Saudi Arabia. *Lithos*, 120(3-4), pp.379-392.
174. Al-Saleh, A.M., Boyle, A.P., and Mussett, A.E., 1998, Metamorphism and  $^{40}\text{Ar}/^{39}\text{Ar}$  dating of the Halaban ophiolite and associated units: evidence for two-stage orogenesis in the eastern Arabian shield: *Journal of the Geological Society, London*, v. 155, p. 165-175.
175. Bokhari, F.Y., and Kramers, J.D., 1981, Island-arc character and late Precambrian age of volcanics at Wadi Shwas, Hijaz, Saudi Arabia: geochemical and Sr and Nd isotopic evidence: *Earth and Planetary Science Letters*, v. 54, p. 409-422.
176. Cooper, J.A., Stacey, J.S., Stoesser, D.B., and Flack, R.J., 1979. An evaluation of the zircon method of isotopic dating in the southern Arabian craton: *Contributions to Mineralogy and Petrology*, v. 68, p. 429-439.
177. Cosca, M.A., Shimron, A., Caby, R., 1999. Late Precambrian metamorphism and cooling in the Arabian–Nubian Shield. *Petrology and  $^{40}\text{Ar}/^{39}\text{Ar}$  geochronology of metamorphic rocks of the Elat area (southern Israel)*. *Precambrian Research* 98, 107–127.
178. El-Makhrouf, A.A. and Fullagar, P.D., 2000. The rubidium-strontium geochronology of the Pan-African post-orogenic granites of the eastern Tibesti orogenic belt, Tibesti Massif, South-central Libya: application to origin and tectonic evolution. In *Geological Exploration in Murzuq Basin* (pp. 379-395). Elsevier Science BV.
179. El-Makhrouf, A.A., 1984. *Geology, Petrology, Geochemistry, and Geochronology of Eghei (Nugay) batholith alkali-rich granites, NE Tibesti, Libya*. MSc thesis, University of North Carolina at Chapel Hill, 289p.
180. Schandelmeier, H., Richter, A. and Franz, G., 1983. Outline of the geology of magmatic and metamorphic units between Gebel Uweinat and Bir Safsaf (SW Egypt/NW Sudan). *Journal of African Earth Sciences* (1983), 1(3-4), pp.275-283.
181. Fleck, R.J., Hadley, D.G., 1985. Ages and Strontium Initial Ratios of Plutonic Rocks in a Transect of the Arabian Shield. Saudi Arabian Deputy Ministry for Mineral Resources Open-File Report USGS-OF-03-38, 43 p.

182. Hedge, C.E., 1984, Precambrian geochronology of part of northwestern Saudi Arabia: Saudi Arabian Deputy Ministry for Mineral Resources Open-File Report USGS-OF-04-31, 12 p.
183. Kusky, T., Matsah, M., 2003. Neoproterozoic Dextral Faulting on the Najd Fault System, Saudi Arabia, preceded sinistral faulting and escape tectonics related to closure of the Mozambique Ocean. In: Yoshida, M., Windley, B.F., Dasgupta, S., Powell, C. (Eds.), *Proterozoic East Gondwana: Supercontinent Assembly and Breakup*, vol. 206. Geological Society, London, Special Publication, pp. 327–361.
184. Lancelot, J.L.R. and Bosch, D., 1991. A Pan African age for the HP-HT granulite gneisses of Zabargad island: implications for the early stages of the Red Sea rifting. *Earth and planetary science letters*, 107(3-4), pp.539-549.
185. Radain, A.A., Ali, S., Nasseef, A.O., and Abdel-Monem, A.A., 1987, Rb-Sr geochronology and geochemistry of plutonic rocks from the Wadi Shuqub quadrangles, west-central Arabian shield: *Journal of African Earth Sciences*, v. 6, p. 553-568.
186. Ries, A.C., Shackleton, R.M. and Dawoud, A.S., 1985. Geochronology, geochemistry and tectonics of the NE Bayuda Desert, N Sudan: implications for the western margin of the late Proterozoic fold belt of NE Africa. *Precambrian Research*, 30(1), pp.43-62.
187. Stoeser, D.B., Stacey, J.S., Greenwood, W.R., and Fischer, L.B., 1984. U/Pb zircon geochronology of the southern part of the Nabitah mobile belt and Pan-African continental collision in the Saudi Arabian shield: Saudi Arabian Deputy Ministry for Mineral Resources Technical Record USGS-TR-04-5, 88 p.
188. Robinson, F.A., Pease, V., Whitehouse, M.J. and Kooijman, E., 2018. Preliminary detrital zircon signatures from the southern Asir terrane, Saudi Arabia: A link to Yemen or the Nubian Shield?. *Precambrian Research*, 311, pp.247-261.
189. Schürmann, H. M. E., 1974, *The Precambrian in North Africa*: E. J. Brill, Leiden, XVI+351 pp.+ 88 photographic plates+ 3 foldout maps in back pocket.
190. Blades, M., Collins, A., Foden, J., Payne, J., Xu, X., Alemu, T., Woldetinsae, G., Clark, C., Taylor, R., 2015. Age and Hafnium Isotopic Evolution of the Didesa and Kemashi Domains, Western Ethiopia. *Precambrian Research*. 270. 10.1016/j.precamres.2015.09.018.
191. Blades, M., 2013. *The Age and the Origin of the Western Ethiopian Shield*. The University of Adelaide, Honours Degree in Geology, 82 pp.
192. Yibas, B., Reimold, W.U., Armstrong, R., Koeberl, C., Anhaeusser, C.R., Phillips, D., 2002. The tectonostratigraphy, granitoid geochronology and geological evolution of the Precambrian of southern Ethiopia, *Journal of African Earth Sciences*, Volume 34, Issues 1–2, 57-84,
193. Avigad, D., Stern, R.J., Beyth, M., Miller, N. & McWilliams, M.O., 2007. Detrital zircon U–Pb geochronology of Cryogenian diamictites and Lower Paleozoic sandstone in Ethiopia (Tigray): age constraints on Neoproterozoic glaciation and crustal evolution of the southern Arabian–Nubian Shield. *Precambrian Research* 154, 88–106.
194. Tadesse, T., Hoshino, M., Suzuki, K., Iizumi, S., 2000. Nd, Rb–Sr and Th–U–Pb zircon ages of syn- and post-tectonic granitoids from the Axum area of northern Ethiopia. *J. Afr. Earth Sci.* 30, 313–327.
195. Ghebreab, W., Talbot, C.J., Page, L., 2005. Time constrains on exhumation of the East African Orogen from field observations and  $^{40}\text{Ar}/^{39}\text{Ar}$  cooling ages of low-angle mylonites in Eritrea, NE Africa. *Precambrian Research* 139, 20–41.

196. Grenne, T., Pedersen, R., Bjerkgård, T., Braathen, A., Selassie, M., Worku, T., 2003. Neoproterozoic evolution of Western Ethiopia: igneous geochemistry, isotopesystematics and U–Pb ages. *Geol. Mag.* 140, 373–395.
197. Johnson, T.E., Ayalew, T., Mogessie, A., Kruger, F.J., Poujol, M., 2004. Constraints on the tectonometamorphic evolution of the Western Ethiopian Shield. *Precambrian Res.* 133, 305–327.
198. Asrat, A., Barbey, P., Ludden, J.N., Reisberg, L., Gleizes, G., Ayalew, D., 2004. Petrology and isotope geochemistry of the Pan-African Negash Pluton, Northern Ethiopia: Mafic-Felsic Magma Interactions during the Construction of Shallow-level Calc-alkaline Plutons. *J. Petrol.* 45, 1147–1179.
199. Ayalew, T., Bell, K., Moore, J.M., Parrish, R.R., 1990. U–Pb and Rb–Sr geochronology of the Western Ethiopian Shield. *Geol. Soc. Am. Bull.* 102, 1309–1316.
200. Mock, C., Arnaud, N.O., Cantagrel, J.-M., Yirgu, G., 1999.  $^{40}\text{Ar}/^{39}\text{Ar}$  thermochronology of the Ethiopian and Yemeni basements: reheating related to the Afar plume? *Tectonophysics* 314, 351–372.
201. Rogers, A., Miller, J.M., Mohr, P.A., 1965. Age determinations of some Ethiopian basement rocks. *Nature* 206, 1021–1026.
202. Miller, N.R., Alene, M., Sacci, R., Stern, R.J., Kröner, A., Conti, A., Zuppi, G., 2003. Significance of the Tambien Group (Tigray, N. Ethiopia) for Snowball Earth Events in the Arabian–Nubian Shield. *Precambrian Res.* 121, 263–283.
203. Teklay, M., Kröner, A., Mezger, K., 2001. Geochemistry, geochronology and isotope geology of Nakfa intrusive rocks, northern Eritrea: products of a tectonically thickened Neoproterozoic arc crust. *J. Afr. Earth Sci.* 33, 283–301.
204. Teklay, M., Kröner, A. and Mezger, K. 2002. Enrichment from plume interaction in the generation of Neoproterozoic arc rocks in northern Eritrea: implications for crustal accretion in the southern Arabian–Nubian Shield. *Chem. Geol.*, v. 184, pp. 167–184.
205. Teklay, M., Haile, T., Kröner, A., Asmerom, Y., Watson, J., 2003. A back-arc Paleotectonic setting for the Augaro Neoproterozoic magmatic rocks of western Eritrea. *Gondwana Res.* 6 (4), 629–640.
206. Kebede, T., Kloetzli, U.S., Koeberl, C., 2001. U/Pb and Pb/Pb zircon ages from granitoid rocks of Wallagga area: constraints on magmatic and tectonic evolution of Precambrian rocks of western Ethiopia. *Mineral. Petrol.* 71, 251–271.
207. Woldemichael, B.W., Kimura, J.-I., Dunkley, D.J., Tani, K., Ohira, H., 2010. SHRIMP–Pb zircon geochronology and Sr–Nd isotopic systematic of the Neoproterozoic Ghimbi–Nedjo mafic to intermediate intrusions of western Ethiopia: a record of passive margin magmatism at 855 Ma? *Int. J. Earth Sci.* 99, 1773–1790.
208. Kebede, T., Horie, K., Hidaka, H., Terada, K., 2007. Zircon ‘microvein’ in peralkaline granitic gneiss, western Ethiopia: Origin, SHRIMP U–Pb geochronology and trace element investigations. *Chemical Geology - CHEM GEOL.* 242. 76–102. 10.1016/j.chemgeo.2007.03.014.
209. Gebreyohannes, G.W., 2014. Geology, geochemistry and geochronology of Neoproterozoic rocks in western Shire, Northern Ethiopia. Master Thesis in Geosciences Discipline: Geology of mineral resources Department of Geosciences Faculty of Mathematics and Natural Sciences University of Oslo. 75 pp.

210. Evuk, D.O., 2013, Geodynamic evolution of the central-eastern Bayuda Desert Basement, Sudan: structural, petrological, geochemical and geochronological investigations, Technische Universität Berlin, Doctoral Thesis, 193 pp.
211. Stern, R.J., 1994. Arc assembly and continental collision in the Neoproterozoic E African Orogen: implication for the consolidation of Gondwanaland. *Annual Reviews of Earth Planetary Sciences* 22, 319–351.
212. Andresen, A., Abu El-Enen, M. M., Stern, R. J., Wilde, S. A. & Ali, K. A., 2014. The Wadi Zaghra metasediments of Sinai, Egypt: new constraints on the late Cryogenian–Ediacaran tectonic evolution of the northernmost Arabian–Nubian Shield. *International Geology Review* 56, 1020–3
213. Be'eri-Shlevin, Y & Eyal, M., Eyal, Y., & Whitehouse, M. & Litvinovsky, B., 2012. The Sa'al volcano-sedimentary complex (Sinai, Egypt): A latest Mesoproterozoic volcanic arc in the northern Arabian Nubian Shield. *Geology*. 40. 403-406. 10.1130/G32788.1.
214. Akaad and Noweir, 1969, Lithostratigraphy of the Hammamat-Um Seleimat District, Eastern Desert, Egypt, *Nature*, v. 223, 284-285
215. Kazmin, V., Shifferaw, A., & Balcha, T., 1978. The Ethiopian basement: Stratigraphy and possible manner of evolution. *Geologische Rundschau*, 67(2), 531–546. doi:10.1007/bf01802803
216. Schmidt, D.L., Hadley, D.G., and Stoesser, D.B., 1979, Late Proterozoic crustal history of the Arabian Shield southern Najd province, Kingdom of Saudi Arabia: King Abdulaziz University Institute of Applied Geology Bulletin 3, v. 2, p. 41-58.
217. Klerkx, J., 1980. Age and metamorphic evolution of the basement complex around Jabal al Awaynat. In: M.J. Salem and M.T. Busrewil (Editors), *The Geology of Libya*. Academic, London, Vol. 3, 901-906.
218. Greenberg, J. K., 1981, Characteristics and origin of Egyptian ounger Granites: Summary, *GSA Bulletin*, v. 92(5), 224-232
219. Calvez, J.-Y., and Kemp, J., 1982, Geochronological investigations in the Mahd adh Dhahab quadrangle, central Arabian Shield: Saudi Arabian Deputy Ministry for Mineral Resources Technical Report BRGM-TR-02-5, 41 p.
220. Kemp, J., Gros, Y., and Prian, J.-P., 1982, Geologic map of the Mahd adh Dhahab quadrangle sheet 23E, Kingdom of Saudi Arabia: Saudi Arabian Deputy Ministry for Mineral Resources Geologic Map GM-64, scale 1:250,000, 39 p.
221. Warden, A.J., 1982, Reconnaissance geology of the Markas quadrangle, sheet 18/43B, Kingdom of Saudi Arabia: Saudi Arabian Deputy Ministry for Mineral Resources Open-File Report USGS-OF-02-41, 58 p.
222. Roobol, M.J., Ramsay, C.R., Jackson, N.J., and Darbyshire, D.P.F., 1983, Late Proterozoic lavas of the Central Arabian Shield – evolution of an ancient volcanic system: *Journal of the Geological Society*, London, v. 140, p. 185-202.
223. Huth, A., Franz, G. and Schandemeier, H., 1984. Magmatic and metamorphic rocks of NW Sudan: a reconnaissance survey. *Berliner Geowiss., Abh. (A)*, 50: 7-21.
224. Yassin, A. A., Khalil, F. A., and El Shafie, A. G., 1984, Explanatory note to the geological map at the scale of 1:2000000 of the Democratic Republic of the Sudan, The Ministry of Energy and Mining Geological & Mineral Resources Department, Bulletin no. 35, 62 pages + 1 map.

225. Fairer, G.M., 1985, Geologic map of the Wadi Baysh quadrangle, Sheet 17 F, Kingdom of Saudi Arabia: Saudi Arabian Deputy Ministry for Mineral Resources Geologic Map GM77, scale 1:250,000, 23 p.
226. Klemenic, P.M., 1985, Klemenic, P. M. (1985). New geochronological data on volcanic rocks from northeast Sudan and their implication for crustal evolution. *Precambrian Research*, 30(3), 263–276. doi:10.1016/0301-9268(85)90023-3
227. Agar, R.A., 1986, The Bani Ghayy group: sedimentation and volcanism in pull-apart grabens of the Najd strike-slip orogen, Saudi Arabian shield: *Precambrian Research*, v. 31, p. 257-274.
228. Richter, A., 1986. Geologie der metamorphen und magmatischen Einheiten im Gebiet zwischen Gebel Uweinat und Gebel Kamil-SW Ägypten/NW Sudan. *Berliner Geowiss., Abh. (A)*, 73: 201.
229. Sahl, M., and Smith, J.W., 1986, Geologic map of the Al Muwayh quadrangle, sheet 22 E, Kingdom of Saudi Arabia: Saudi Arabian Deputy Ministry for Mineral Resources Geoscience Map GM-88, scale 1:250,000, 29 p.
230. Bemau, R., Darbyshire, D.P.F., Franz, G., Harms, U., Huth, A., Mansour, N., Pasteels, P. and Schandemeier, H., 1987, Petrology, geochemistry and structural development of the Bir Safsaf-Aswan uplift/Southern Egypt. *J. Afr. Earth Sci.*, 6(1): 79-90.
231. Thieme, J., 1988, Geologic map of the Jabal Khida quadrangle, sheet 21 G, Kingdom of Saudi Arabia: Saudi Arabian Directorate General of Mineral Resources Geologic Map GM 90, scale 1:250,000, 35 p.
232. Willis and Stern, 1988, Age and geochemistry of late Precambrian sediments of the Hammamar Series from the northeastern desert of Egypt, *Precambrian Research*, v. 42, 173-187
233. Affi, A.M., 1989, Geology of the Mahd adh Dhahab district, Kingdom of Saudi Arabia: Saudi Arabian Directorate General of Mineral Resources Open-File Report USGS-OF-09-2, 49 p.
234. Ghoneim, M. F., 1989, Mineral chemistry of some gabbroic rocks of the Central Eastern desert, Egypt, *Journal of African Earth Sciences (and the Middle East)*, v. 9(2), 289-295.
235. Moore, T.A., and Ar-Rehaili, H., 1989, Geologic map of the Makkah quadrangle, sheet 21D, Kingdom of Saudi Arabia: Saudi Arabian Deputy Ministry for Mineral Resources Geoscience Map GM 107, 62 p.
236. Noweir, A. M., Sewifi, B. M., and Abu El Ela, A. M., 1990, Geology, petrography, geochemistry and petrogenesis of the Egyptian Younger Granites, *Qatar Univ. Sci. Bull.*, v. 10, 363-393.
237. El-Mettwaly, A. A., Zalata, A. A. and Abu El-Enen, M. M., 1992, The evolution of the Pan-African granitoid rocks: geochemical evidences from SW Sinai massif, Egypt, *Journal of African Earth Sciences (and the Middle East)*, v. 14 (1), 111-119.
238. Abdel-Karim, A. M., 1995, Late Precambrian Metagabbro-Diorite Complex from southwest Sinai, Egypt, *Egypt. J. Geol.*, 39(2), 715-738
239. Holail, H. M. and Moghazi, A-K., M. (1998), Provenance, tectonic setting and geochemistry of greywackes and siltstones of the late Precambrian Hammamat Group, Egypt, *Sedimentary Geology*, v. 166, 227-250
240. Beyth, M., 2001, Preliminary indications for Snowball Earth in the East African Orogen: *Geological Society of Australia Abstracts*, v. 65.



241. Anderson, U.B., Ghebreab, W., Teklay, M., 2006. Crustal evolution and metamorphism in east central Eritrea, south-east Arabian–Nubian Shield. *J. Afr. Earth Sci.* 44, 45–65.
242. Eliwa, H. A., Kimura, J.-I., and Itaya, T., 2006, Late Neoproterozoic Dokhan Volcanics, North Eastern Desert, Egypt: Geochemistry and petrogenesis, *Precambrian Research*, v. 151, 31-52.
243. Stern, R.J., Avigad, D., Miller, N.R., and Beyth, M., 2006, Evidence for the Snowball Earth hypothesis in the Arabian-Nubian shield and the East African Orogen: *Journal of African Earth Sciences*, v. 44, p. 1-20.
244. Schlüter, T., 2008, *Geological Atlas of Africa with notes on stratigraphy, tectonics, economic geology, geohazards, geosites and geoscientific education of each country*, 2nd edition: Springer, Berlin, 308 pp.+1 CD-ROM
245. Hoffman, P.F., and Li, Z.-X., 2009, A palaeogeographic context for Neoproterozoic glaciation: *Palaeogeography, Palaeoclimatology, Palaeoecology*, v. 277, p. 158–172, doi:10.1016/j.palaeo.2009.03.013.
246. Miller, N. R., Stern, R. J., Avigad, D., Beyth, M., & Schilman, B., 2009. Cryogenian slate-carbonate sequences of the Tambien Group, Northern Ethiopia (I): Pre-“Sturtian” chemostratigraphy and regional correlations. *Precambrian Research*, 170(3-4), 129–156. doi:10.1016/j.precamres.2008.12.004
247. Miller, N. R., Avigad, D., Stern, R. J., & Beyth, M., 2011. Chapter 21 The Tambien Group, Northern Ethiopia (Tigre). *Geological Society, London, Memoirs*, 36(1), 263–276. doi:10.1144/m36.21
248. Abdel-Karim, A. M., El-Awady, A., Helmy, H., Al-Afandy, A. H., Sh Abdalla, 2011, Younger Gabbros from Egypt: a transition from tholeiitic to alkaline basaltic magma and from arc to within plate rifting regime, The 6th Environmental Conference, Faculty of Science, Zagazih University, 194-220.
249. Azer, M. K. and El-Gharbawy, R. I., 2011, Contribution to the neoproterozoic layered mafic-ultramafic intrusion of galab Imleih, south Sinai, Egypt: implication of post-collisional magmatism in the north Arabian-Nubian shield, *J. African Earth Science*, v. 60, 253-272.
250. Qaoud N, Abdelnasser A (2012) Geochemistry and petrogenesis of El-Fringa metagabbro-diorite rocks, Wadi Sa'al area, south Sinai, Egypt. *J Azhar Univ-Gaza (Nat Sci)* 14:111–138
251. Obaje, N. G., 2009, *Geology and Mineral Resources of Nigeria*: Springer, Berlin, xiv+221 pp.
252. Azer, M.K., Obeid, M.A. and Ren, M., 2014, Geochemistry and petrogenesis of late Ediacaran (605–580 Ma) post-collisional alkaline rocks from the Katherina ring complex, south Sinai, Egypt, *J. of Asian Earth Science*, v. 93, 229-252.
253. Evuk, D., Franz, G., Frei D. and Lucassen, F., 2014, The Neoproterozoic evolution of the central-eastern Bayuda Desert (Sudan), *Precambrian Research*, v. 240, 108-125
254. Flowerdew, M., Stoesser, D.B., and Whitehouse, M.J., 2004, The Nabitah fault zone: is it a suture between two ensimatic arcs? Abstracts; 32nd IGC – Florence
255. Swanson-Hysell, N. L., Maloof, A. C., Condon, D. J., Jenkin, G. R. T., Alene, M., Tremblay, M. M., Haileab, B., 2015. Stratigraphy and geochronology of the Tambien Group, Ethiopia: Evidence for globally synchronous carbon isotope change in the Neoproterozoic. *Geology*, 43(4), 323–326. doi:10.1130/g36347.1

256. Khedr, M. Z. and Arai, S., 2016a, Petrology of a neoproterozoic alaskan-type complex from the Eastern Desert of Egypt: implications for mantle heterogeneity, *Lithos*, v. 263, 15-32.
257. Khedr, M. Z. and Arai, S., 2016b, Chemical variations of mineral inclusions in Neoproterozoic high-Cr chromitites from Egypt: evidence of fluids during chromitite genesis, *Lithos*, 240-243, 309-326.
258. MacLennan, S., Park, Y., Swanson-Hysell, N., Maloof, A., Schoene, B., Gebreslassie, M., Antilla, E., Tesema, T., Alene, M., and Haileab, B., 2018. The arc of the Snowball: U-Pb dates constrain the Islay anomaly and the initiation of the Sturtian glaciation. *Geology*, 46(6), 539–542. doi:10.1130/g40171.1
259. Kattan, F.H., and Harire, A.R., 2000, Geology of the Ad Duwayah-Bi'r Warshah mineral belt: Saudi Geological Survey Open-File Report USGS-OF-99-6, 33 p.
260. Said, R., editor, 1990, *The Geology of Egypt*: A. A. Balkema, Rotterdam, X+734 pp.
261. Dardir, A. A. and Abu Zeid, K. M., 1972. Geology of the basement rocks between latitudes 27°00' and 27°30'N, Eastern Desert, *Ann. Geol. Surv. Egypt*, v. 17, 19-35.
262. Bendor, Y. K., 1985. The crustal evolution of the Arabo-Nubian Massif with special reference to Sinai Peninsula. *Precambrian Research*, v. 28, 1-74.
263. Klerx, J., 1980. Age and metamorphic evolution of the Pan-African crystalline Basement complex around Jabal al Awaynat, In: Salem, M. J. and Busrewil, M. T. (Eds), *The Geology of Libya*, v. 3, 901-906.
264. Bernau, R., Darbyshire, D. P. F., Franz, G., Harms, U., Huth, A., Mansour, N., Pasteels, P. and Schandelmeyer, H., 1987. Petrology, geochemistry and structural development of the Bir Safsaf-Aswan Uplift, Southern Egypt, *Journal of African Earth Sciences*, v. 6, 79-90.
265. Ogezi, A. E. O., 1977. Geochemistry and geochronology of basement rocks from northwestern Nigeria. Unpublished PhD thesis, Univ. of Leeds, England, pp. 295.
266. Caby, R., Andreopoulos-Renaud, U., Gravelle, M., 1982. Cadre géologique et géochronologique U/Pb sur zircon des batholites précoces dans le segment pan-africain du Hoggar central (Algérie). *Bull. la Société Géologique Fr.* S7-XXIV, 677–684. <https://doi.org/10.2113/gssgfbull.S7-XXIV.4.677>.
267. Caby, R., Dostal, J and Dupey, C., 1977. Upper Proterozoic greywackes from western Hoggar (Algeria). *Geology and geochemistry. Precambrian Research*, v. 5, 283-297.
268. Chikhaoui, M., Dupuy, C. and Dostal, J., 1978. Geochemistry of late Proterozoic volcanic rocks from Tassendjanet area (NW Hoggar, Algeria). *Contrib. Mineral. Petrol.*, v. 66: 157-164.
269. Caby, R. and Monié, P., 2003. Neoproterozoic subductions and differential exhumation of western Hoggar (southwest Algeria): new structural, petrological and geochronological evidence. *J. Afr. Earth Sci.* v. 37, 269–293.
